# Supplementary material for: A pooled genome-wide screening strategy to identify and rank influenza host restriction factors in cell-based vaccine production platforms
Source: Sci Rep. 2020 Jul 22;10:12166. doi: 10.1038/s41598-020-68934-y (PMC7376217; doi:10.1038/s41598-020-68934-y)
Supplement: Supplementary file 4 — Supplementary information S4. [file 41598_2020_68934_MOESM4_ESM.xlsx]

## Sheet: Title
A pooled genome-wide screening strategy to identify and rank influenza host restriction factors in
cell-based vaccine production platforms
David M. Sharon, Sean Nesdoly, Hsin J. Yang, Jean-François Gélinas, Yu Xia, Sven Ansorge, Amine A.
Kamen*
Supplemental S4 MAGeCKFlute output
This file contains a summary of the MAGeCKFlute RRA analysis, including the ranking of all a) genes and b) individual sgRNA. "FDR" column contains p values adjusted for multiple testing. Also included are c) read allignment statistics for each sample as well as d) QC information for the sequencing run for each sample.

## Sheet: gene summary
id	num	neg|score	neg|p-value	neg|fdr	neg|rank	neg|goodsgrna	neg|lfc	pos|score	pos|p-value	pos|fdr	pos|rank	pos|goodsgrna	pos|lfc
DDX6	4	1	1	1	19107	0	1.2813	1.0915e-13	2.5909e-07	0.00011	1	4	1.2813
TSC2	4	1	1	1	19106	0	0.93965	1.4252e-13	2.5909e-07	0.00011	2	4	0.93965
CARM1	4	1	1	1	19105	0	0.95555	2.4973e-13	2.5909e-07	0.00011	3	4	0.95555
RFX7	4	1	1	1	19104	0	0.53804	7.2563e-09	2.5909e-07	0.00011	4	4	0.53804
C19orf43	4	1	1	1	19103	0	0.46688	8.9204e-09	2.5909e-07	0.00011	5	4	0.46688
TSC1	4	1	1	1	19102	0	0.66066	9.1654e-09	2.5909e-07	0.00011	6	4	0.66066
DNTTIP1	4	1	1	1	19101	0	0.52386	1.5431e-08	2.5909e-07	0.00011	7	4	0.52386
ZC3HC1	4	1	1	1	19100	0	0.5073	2.4053e-08	2.5909e-07	0.00011	8	4	0.5073
NR2C2AP	4	1	1	1	19099	0	0.6528	2.7153e-08	2.5909e-07	0.00011	9	4	0.6528
NPRL3	4	0.99997	1	1	19080	0	0.50561	5.1515e-08	2.5909e-07	0.00011	10	4	0.50561
NXF1	4	0.54334	0.54769	1	10240	1	0.569	5.8917e-08	2.5909e-07	0.00011	11	2	0.569
ARMC5	4	0.94398	0.9595	1	17459	0	0.66949	6.7767e-08	2.5909e-07	0.00011	12	3	0.66949
YTHDF2	4	1	1	1	19093	0	0.74461	9.7377e-08	2.5909e-07	0.00011	13	4	0.74461
SMG9	3	1	1	1	19098	0	0.7415	1.0898e-07	2.5909e-07	0.00011	14	3	0.7415
EDC4	4	1	1	1	19097	0	0.4498	1.3198e-07	2.5909e-07	0.00011	15	4	0.4498
SRSF11	4	1	1	1	19096	0	0.55641	1.4022e-07	2.5909e-07	0.00011	16	4	0.55641
NUP98	3	1	1	1	19095	0	1.1185	1.6075e-07	2.5909e-07	0.00011	17	3	1.1185
GTPBP1	4	1	1	1	19094	0	0.5302	2.4138e-07	2.5909e-07	0.00011	18	4	0.5302
DCP2	4	0.95152	0.96488	1	17632	0	0.69661	2.7011e-07	2.5909e-07	0.00011	19	3	0.69661
NUPL2	4	0.99439	0.99763	1	18776	0	0.84356	3.0283e-07	2.5909e-07	0.00011	20	4	0.84356
TMEM209	4	1	1	1	19092	0	0.60223	4.5124e-07	2.5909e-07	0.00011	21	4	0.60223
GNB1L	4	1	1	1	19091	0	0.57309	7.1863e-07	2.5909e-07	0.00011	22	4	0.57309
DPH3P1	4	0.95783	0.97028	1	17800	0	0.47103	7.9066e-07	2.5909e-07	0.00011	23	3	0.47103
SETD1A	4	1	1	1	19090	0	0.58402	1.246e-06	2.5909e-07	0.00011	24	4	0.58402
ZCCHC8	4	1	1	1	19089	0	0.32151	1.682e-06	2.5909e-07	0.00011	25	4	0.32151
RPRD1B	4	0.99608	0.99837	1	18846	0	0.5623	1.8133e-06	2.5909e-07	0.00011	26	4	0.5623
RCE1	4	1	1	1	19088	0	0.28958	2.4873e-06	2.5909e-07	0.00011	27	4	0.28958
NXT1	4	0.99995	1	1	19077	0	0.87803	3.5565e-06	2.5909e-07	0.00011	28	4	0.87803
MYO10	4	1	1	1	19087	0	0.48719	3.846e-06	2.5909e-07	0.00011	29	4	0.48719
NDST1	3	1	1	1	19086	0	0.45598	4.0114e-06	2.5909e-07	0.00011	30	3	0.45598
EIF3L	4	0.99992	0.99999	1	19067	0	0.68978	5.0538e-06	2.5909e-07	0.00011	31	4	0.68978
ENY2	4	0.84085	0.85318	1	15287	0	0.53143	5.57e-06	2.5909e-07	0.00011	32	3	0.53143
NPRL2	4	0.16345	0.2196	0.833978	4993	1	0.57858	5.7488e-06	2.5909e-07	0.00011	33	3	0.57858
FZR1	4	0.99999	1	1	19085	0	0.28915	6.8481e-06	2.5909e-07	0.00011	34	4	0.28915
STK11	4	0.99999	1	1	19084	0	0.4994	7.0628e-06	2.5909e-07	0.00011	35	4	0.4994
MOCS3	4	0.99999	1	1	19083	0	0.47311	8.8043e-06	2.5909e-07	0.00011	36	4	0.47311
ZC3H10	4	0.92425	0.93915	1	16971	0	0.5485	8.8525e-06	2.5909e-07	0.00011	37	3	0.5485
ANKRD49	4	0.68367	0.6708	1	12314	1	0.52239	9.3394e-06	2.5909e-07	0.00011	38	3	0.52239
ADRM1	4	0.88596	0.90281	1	16176	0	0.34656	1.1484e-05	2.5909e-07	0.00011	39	3	0.34656
CADM1	4	0.99999	1	1	19082	0	0.37744	1.1556e-05	2.5909e-07	0.00011	40	4	0.37744
CSNK2A1	4	0.99975	0.99996	1	19040	0	0.5175	1.1638e-05	2.5909e-07	0.00011	41	4	0.5175
ZNF131	4	0.8366	0.84824	1	15206	0	0.66388	1.2309e-05	2.5909e-07	0.00011	42	3	0.66388
KTI12	4	0.96327	0.97518	1	17931	0	0.55825	1.5271e-05	2.5909e-07	0.00011	43	3	0.55825
DPM1	4	0.99984	0.99997	1	19052	0	0.35423	1.5776e-05	2.5909e-07	0.00011	44	4	0.35423
FADD	4	0.99931	0.99976	1	19000	0	0.42734	2.0336e-05	7.7728e-07	0.000286	45	4	0.42734
GLE1	4	0.97552	0.98432	1	18232	0	0.65183	2.0686e-05	7.7728e-07	0.000286	46	3	0.65183
JPH2	4	0.94228	0.95674	1	17428	0	0.3135	2.6242e-05	7.7728e-07	0.000286	47	3	0.3135
PRRC2B	4	0.99997	1	1	19081	0	0.24994	2.6765e-05	7.7728e-07	0.000286	48	4	0.24994
CNOT6	4	0.94893	0.96319	1	17574	0	0.57151	2.8265e-05	7.7728e-07	0.000286	49	3	0.57151
RBM10	4	0.99991	0.99999	1	19064	0	0.62428	2.915e-05	7.7728e-07	0.000286	50	4	0.62428
AMD1	4	0.949	0.96319	1	17577	0	0.67174	3.0957e-05	7.7728e-07	0.000286	51	3	0.67174
PCIF1	4	0.99842	0.99933	1	18950	0	0.34334	3.5929e-05	1.2955e-06	0.000442	52	4	0.34334
KHSRP	4	0.99992	0.99999	1	19066	0	0.56932	3.8687e-05	1.2955e-06	0.000442	53	4	0.56932
C5orf22	4	0.99996	1	1	19079	0	0.30444	4.0155e-05	1.2955e-06	0.000442	54	4	0.30444
SLC17A6	4	0.99996	1	1	19078	0	0.25672	4.3734e-05	1.8137e-06	0.000608	55	4	0.25672
NUP50	3	0.99935	0.99983	1	19004	0	0.64285	4.6236e-05	2.5909e-07	0.00011	56	3	0.64285
UPF2	4	0.99977	0.99996	1	19044	0	0.56844	4.6436e-05	3.3682e-06	0.00111	57	4	0.56844
RTEL1	4	0.67692	0.66586	1	12215	1	0.45604	4.8464e-05	3.8864e-06	0.001259	58	3	0.45604
KBTBD4	4	0.99995	1	1	19076	0	0.32019	4.9609e-05	4.9228e-06	0.001568	59	4	0.32019
ZFR	4	0.99995	0.99999	1	19075	0	0.47779	5.0998e-05	6.4773e-06	0.001996	60	4	0.47779
CST3	4	0.98736	0.99291	1	18539	0	0.3317	5.1082e-05	6.4773e-06	0.001996	61	3	0.3317
CAAP1	4	0.99994	0.99999	1	19074	0	0.40241	5.9738e-05	8.0319e-06	0.002398	62	4	0.40241
LCMT1	4	0.99753	0.99896	1	18907	0	0.42722	6.0221e-05	8.0319e-06	0.002398	63	4	0.42722
ELF5	4	0.99994	0.99999	1	19073	0	0.32346	6.3675e-05	8.5501e-06	0.002513	64	4	0.32346
PTCD2	4	0.99994	0.99999	1	19072	0	0.26373	6.4622e-05	9.5865e-06	0.002775	65	4	0.26373
CSTL1	4	0.99993	0.99999	1	19071	0	0.37694	6.8596e-05	1.1141e-05	0.00301	66	4	0.37694
MRPL54	4	0.99836	0.99929	1	18943	0	0.38767	6.9855e-05	1.1659e-05	0.00301	67	4	0.38767
ADAMTS10	4	0.99993	0.99999	1	19070	0	0.377	7.0895e-05	1.1659e-05	0.00301	68	4	0.377
LMNB2	4	0.88025	0.89843	1	16066	0	0.4372	7.1305e-05	1.1659e-05	0.00301	69	3	0.4372
OR1I1	4	0.7627	0.76247	1	13776	0	0.32281	7.185e-05	1.1659e-05	0.00301	70	3	0.32281
EIF3K	4	0.97968	0.98721	1	18353	0	0.43277	7.3498e-05	1.1659e-05	0.00301	71	3	0.43277
NRF1	4	0.99939	0.99979	1	19005	0	0.55401	7.4372e-05	1.1659e-05	0.00301	72	4	0.55401
GTPBP2	4	0.99992	0.99999	1	19069	0	0.36318	7.6225e-05	1.2177e-05	0.003102	73	4	0.36318
UCP2	4	0.99992	0.99999	1	19068	0	0.25029	8.0315e-05	1.2696e-05	0.003192	74	4	0.25029
L3MBTL1	4	0.99992	0.99999	1	19065	0	0.35378	8.4707e-05	1.3214e-05	0.003207	75	4	0.35378
C20orf62	4	0.733	0.73258	1	13222	0	0.56461	8.6501e-05	1.3214e-05	0.003207	76	3	0.56461
TRIM23	4	0.9999	0.99999	1	19063	0	0.30322	9.5297e-05	1.3732e-05	0.003207	77	4	0.30322
DIDO1	4	0.9993	0.99975	1	18998	0	0.34254	0.00010239	1.425e-05	0.003207	78	4	0.34254
FBXO21	4	0.9999	0.99999	1	19062	0	0.25597	0.00010301	1.425e-05	0.003207	79	4	0.25597
AP1M1	4	0.99688	0.99867	1	18879	0	0.29103	0.00010435	1.425e-05	0.003207	80	4	0.29103
SLC6A19	4	0.19773	0.26137	0.872471	5692	1	0.25272	0.00010567	1.425e-05	0.003207	81	2	0.25272
SMS	4	0.96526	0.97673	1	17977	0	0.33192	0.00010725	1.425e-05	0.003207	82	3	0.33192
IL12RB1	4	0.99989	0.99999	1	19061	0	0.3231	0.00010763	1.4768e-05	0.003207	83	4	0.3231
PPIL1	4	0.9757	0.9845	1	18237	0	0.3835	0.00010809	1.4768e-05	0.003207	84	3	0.3835
PDCD10	4	0.9989	0.99959	1	18971	0	0.37556	0.00011164	1.4768e-05	0.003207	85	4	0.37556
TRMT5	4	0.99989	0.99999	1	19060	0	0.35057	0.00011402	1.4768e-05	0.003207	86	4	0.35057
MAPRE1	4	0.81862	0.82924	1	14868	0	0.50271	0.00011645	1.5287e-05	0.003282	87	3	0.50271
SEMA6B	4	0.77577	0.77769	1	14021	0	0.47511	0.00012476	1.8914e-05	0.003971	88	3	0.47511
GLRA1	4	0.99987	0.99998	1	19059	0	0.32869	0.00012639	1.8914e-05	0.003971	89	4	0.32869
OR4C45	4	0.99987	0.99998	1	19058	0	0.22374	0.00012798	1.9432e-05	0.003992	90	4	0.22374
APMAP	4	0.99987	0.99998	1	19057	0	0.37913	0.00013067	1.9432e-05	0.003992	91	4	0.37913
UBQLN1	4	0.99986	0.99998	1	19056	0	0.39964	0.00014008	1.995e-05	0.004055	92	4	0.39964
ABCF3	4	0.99985	0.99998	1	19055	0	0.23053	0.00014659	2.3059e-05	0.00445	93	4	0.23053
CHD1	4	0.99135	0.99516	1	18680	0	0.30715	0.00014958	2.3059e-05	0.00445	94	4	0.30715
EIF3H	4	0.9535	0.9669	1	17682	0	0.46421	0.00015115	2.3059e-05	0.00445	95	3	0.46421
TGIF2	4	0.99973	0.99995	1	19037	0	0.37148	0.00015144	2.3059e-05	0.00445	96	4	0.37148
DRD2	4	0.87837	0.89614	1	16034	0	0.17928	0.00015703	2.9278e-05	0.005474	97	2	0.17928
SSU72	2	0.99984	1	1	19054	0	0.65943	0.0001594	1.2955e-06	0.000442	98	2	0.65943
OAZ1	4	0.99984	0.99997	1	19053	0	0.22955	0.00015953	2.9796e-05	0.005474	99	4	0.22955
LBP	4	0.99984	0.99997	1	19051	0	0.38923	0.00016138	2.9796e-05	0.005474	100	4	0.38923
PPDPF	4	0.99891	0.9996	1	18972	0	0.32345	0.00016211	2.9796e-05	0.005474	101	4	0.32345
HCAR3	4	0.99187	0.99554	1	18695	0	0.34649	0.00016272	2.9796e-05	0.005474	102	4	0.34649
PRKDC	4	0.99983	0.99997	1	19050	0	0.30473	0.00016873	3.2387e-05	0.005716	103	4	0.30473
OR51M1	4	0.99983	0.99997	1	19049	0	0.35208	0.00017085	3.2387e-05	0.005716	104	4	0.35208
NPBWR2	4	0.9992	0.99973	1	18993	0	0.34428	0.0001732	3.2387e-05	0.005716	105	4	0.34428
VSTM2L	4	0.99983	0.99997	1	19048	0	0.17013	0.00017347	3.2387e-05	0.005716	106	4	0.17013
C19orf71	4	0.99982	0.99997	1	19047	0	0.2823	0.00017677	3.2905e-05	0.005716	107	4	0.2823
E2F1	4	0.99639	0.99852	1	18856	0	0.37188	0.00017867	3.2905e-05	0.005716	108	4	0.37188
ASB8	4	0.99981	0.99997	1	19046	0	0.34832	0.00019424	3.3423e-05	0.005753	109	4	0.34832
RAI14	4	0.62134	0.61657	1	11328	1	0.26927	0.00021052	3.5496e-05	0.006051	110	3	0.26927
FBXW9	4	0.99978	0.99997	1	19045	0	0.26726	0.00021531	3.6014e-05	0.006051	111	4	0.26726
SNUPN	4	0.98842	0.99349	1	18575	0	0.33029	0.00022503	3.6532e-05	0.006051	112	3	0.33029
FBXW7	4	0.99414	0.99754	1	18768	0	0.32744	0.00023095	3.705e-05	0.006051	113	4	0.32744
ZNF304	4	0.95716	0.96969	1	17785	0	0.46397	0.00023389	3.705e-05	0.006051	114	3	0.46397
PREX1	4	0.99977	0.99996	1	19043	0	0.26385	0.00023472	3.705e-05	0.006051	115	4	0.26385
RXFP3	4	0.99976	0.99996	1	19042	0	0.24806	0.00023552	3.8605e-05	0.006251	116	4	0.24806
PPP2R4	4	0.98834	0.99349	1	18572	0	0.34737	0.00023982	4.275e-05	0.006807	117	3	0.34737
NUDT8	4	0.99976	0.99996	1	19041	0	0.204	0.0002414	4.275e-05	0.006807	118	4	0.204
MCM3AP	4	0.94845	0.96319	1	17567	0	0.33183	0.00025598	4.3269e-05	0.006833	119	3	0.33183
FOXD4L3	3	0.78299	0.80849	1	14170	0	0.6093	0.00025908	2.2541e-05	0.00445	120	2	0.6093
CRAMP1L	4	0.99974	0.99995	1	19039	0	0.3483	0.00026254	4.9487e-05	0.00775	121	4	0.3483
CDX1	4	0.99973	0.99995	1	19038	0	0.26758	0.00026637	5.0005e-05	0.007768	122	4	0.26758
RASA2	4	0.33013	0.40626	0.957614	7981	1	0.3085	0.00027121	5.156e-05	0.007835	123	3	0.3085
COX4I2	4	0.83241	0.84416	1	15131	0	0.26706	0.00027161	5.156e-05	0.007835	124	3	0.26706
DEPDC5	4	0.99904	0.99968	1	18981	0	0.28898	0.00027458	5.2078e-05	0.007835	125	4	0.28898
RANBP1	4	0.99972	0.99995	1	19036	0	0.30423	0.00027541	5.2078e-05	0.007835	126	4	0.30423
KRTAP5-6	4	0.9988	0.99956	1	18963	0	0.25956	0.00027614	5.415e-05	0.008083	127	4	0.25956
SIRPB2	4	0.99972	0.99995	1	19035	0	0.34405	0.00027802	5.6741e-05	0.008404	128	4	0.34405
OR5D14	4	0.94826	0.96319	1	17562	0	0.5173	0.00028458	5.9851e-05	0.008797	129	3	0.5173
HNF1A	4	0.9718	0.98112	1	18131	0	0.28355	0.00029022	6.6069e-05	0.009424	130	3	0.28355
SNRNP40	4	0.99953	0.99984	1	19017	0	0.50834	0.0002913	6.6069e-05	0.009424	131	4	0.50834
NAA20	4	0.61737	0.61492	1	11265	1	0.49404	0.00029426	6.6069e-05	0.009424	132	2	0.49404
IMPDH2	4	0.9997	0.99994	1	19034	0	0.33026	0.00030233	6.6587e-05	0.009424	133	4	0.33026
SLC45A2	4	0.9997	0.99994	1	19033	0	0.30228	0.00030331	6.6587e-05	0.009424	134	4	0.30228
PLCG1	4	0.62749	0.62142	1	11430	1	0.28975	0.00032236	8.1096e-05	0.0113	135	3	0.28975
BTBD18	4	0.99968	0.99992	1	19032	0	0.30612	0.00032398	8.1614e-05	0.0113	136	4	0.30612
SLC43A1	4	0.99966	0.99992	1	19031	0	0.21814	0.00033878	8.8351e-05	0.012043	137	4	0.21814
RPP25L	4	0.99966	0.99992	1	19029	0	0.35824	0.00034226	8.8869e-05	0.012043	138	4	0.35824
PATL1	4	0.99966	0.99992	1	19030	0	0.38482	0.00034355	8.8869e-05	0.012043	139	4	0.38482
GANAB	4	0.65574	0.64611	1	11868	1	0.41366	0.00035154	9.2496e-05	0.012446	140	3	0.41366
DEFB124	4	0.99965	0.99991	1	19028	0	0.20712	0.00035394	9.6642e-05	0.012803	141	4	0.20712
SCAF8	4	0.90147	0.91593	1	16493	0	0.51387	0.00035663	9.6642e-05	0.012803	142	3	0.51387
PLTP	4	0.98271	0.98946	1	18426	0	0.32652	0.0003605	9.716e-05	0.012803	143	3	0.32652
AKAP17A	4	0.99964	0.9999	1	19027	0	0.35034	0.00036456	0.00010079	0.01319	144	4	0.35034
SIN3A	4	0.99963	0.9999	1	19026	0	0.32569	0.00037271	0.00011011	0.014092	145	4	0.32569
TRIM41	4	0.99962	0.9999	1	19025	0	0.28512	0.0003782	0.00011063	0.014092	146	4	0.28512
CSNK1A1	4	0.72346	0.71511	1	13050	0	0.35982	0.00037873	0.00011063	0.014092	147	2	0.35982
TGM2	4	0.99626	0.99845	1	18849	0	0.34563	0.00038565	0.00011063	0.014092	148	4	0.34563
MYO9B	4	0.99961	0.99989	1	19024	0	0.32744	0.00038811	0.00011789	0.014884	149	4	0.32744
DUSP15	4	0.99944	0.99983	1	19007	0	0.29696	0.00038924	0.00011841	0.014884	150	4	0.29696
OR4X1	4	0.99961	0.99988	1	19023	0	0.20768	0.0003937	0.00012514	0.01549	151	4	0.20768
MAP7D2	4	0.37572	0.42932	0.96036	8394	1	0.4029	0.00039484	0.00012566	0.01549	152	3	0.4029
RUNX1	4	0.9996	0.99988	1	19022	0	0.17467	0.00039533	0.00012566	0.01549	153	4	0.17467
THAP10	4	0.11803	0.15793	0.742498	4052	2	0.1883	0.00040664	0.00013291	0.016073	154	2	0.1883
CNBP	4	0.99918	0.99972	1	18991	0	0.33431	0.00040753	0.00013291	0.016073	155	4	0.33431
C10orf12	4	0.98964	0.99416	1	18615	0	0.30702	0.0004116	0.00013291	0.016073	156	3	0.30702
ZFP36L2	4	0.99958	0.99987	1	19021	0	0.22236	0.00042362	0.00014069	0.016696	157	4	0.22236
NEURL2	4	0.99634	0.99848	1	18852	0	0.33568	0.00042429	0.00014069	0.016696	158	4	0.33568
SCGB1D2	4	0.99957	0.99987	1	19020	0	0.23549	0.00042926	0.00014069	0.016696	159	4	0.23549
COLGALT1	4	0.99956	0.99986	1	19019	0	0.29232	0.00043704	0.00015053	0.017646	160	4	0.29232
ATHL1	4	0.99956	0.99986	1	19018	0	0.33058	0.0004372	0.00015053	0.017646	161	4	0.33058
TBC1D7	4	0.89989	0.91324	1	16454	0	0.41286	0.00044794	0.00015416	0.017961	162	3	0.41286
SLC23A1	4	0.62178	0.61657	1	11338	1	0.089856	0.00044918	0.00015572	0.018032	163	2	0.089856
RNF10	3	0.45748	0.45225	0.969059	9213	1	0.4183	0.00045075	7.9023e-05	0.011102	164	2	0.4183
NECAB3	4	0.99952	0.99984	1	19016	0	0.3355	0.00047615	0.00017022	0.019304	165	4	0.3355
PVALB	4	0.99952	0.99984	1	19015	0	0.22332	0.00047666	0.00017022	0.019304	166	4	0.22332
MRPS18B	4	0.99951	0.99984	1	19014	0	0.28847	0.0004855	0.00017074	0.019304	167	4	0.28847
ARL11	4	0.9995	0.99984	1	19013	0	0.29893	0.00049569	0.00017074	0.019304	168	4	0.29893
CDC42BPG	4	0.99949	0.99984	1	19012	0	0.27564	0.00050613	0.00017903	0.01983	169	4	0.27564
ALDH3B2	4	0.99434	0.99759	1	18773	0	0.3282	0.00051349	0.00018422	0.01983	170	4	0.3282
GPX8	4	0.99948	0.99983	1	19011	0	0.32161	0.00051746	0.00018422	0.01983	171	4	0.32161
TGM6	4	0.93934	0.95515	1	17356	0	0.252	0.00051785	0.00018422	0.01983	172	3	0.252
CDK5RAP1	4	0.99948	0.99983	1	19010	0	0.36685	0.00052128	0.00018422	0.01983	173	4	0.36685
ABHD12	4	0.99947	0.99983	1	19009	0	0.28127	0.00052696	0.00018422	0.01983	174	4	0.28127
LRTOMT	4	0.99947	0.99983	1	19008	0	0.30689	0.00053074	0.00018473	0.01983	175	4	0.30689
ARHGAP4	4	0.75292	0.75229	1	13602	0	0.20262	0.00053102	0.00018473	0.01983	176	2	0.20262
EEF1A2	4	0.9992	0.99973	1	18992	0	0.31874	0.00054175	0.00018473	0.01983	177	4	0.31874
LMTK3	4	0.99944	0.99983	1	19006	0	0.30378	0.00056489	0.00019095	0.02027	178	4	0.30378
PGA3	4	0.97999	0.98721	1	18360	0	0.35469	0.00056543	0.00019095	0.02027	179	3	0.35469
DRG1	4	0.99123	0.99516	1	18674	0	0.45267	0.00057305	0.00021842	0.023057	180	4	0.45267
EMID1	4	0.99774	0.99901	1	18917	0	0.54298	0.00057836	0.00022826	0.023821	181	4	0.54298
EIF3D	4	0.75069	0.74777	1	13567	0	0.60265	0.00058091	0.00022826	0.023821	182	3	0.60265
SLC35B2	4	0.99931	0.99976	1	18999	0	0.40486	0.00059899	0.00023137	0.023821	183	4	0.40486
TP53	4	0.43475	0.45893	0.970543	8984	1	0.23471	0.00060091	0.00023137	0.023821	184	3	0.23471
OR6B3	4	0.21466	0.2857	0.901553	6015	1	0.030586	0.00060768	0.00023189	0.023821	185	1	0.030586
FIBP	4	0.934	0.9487	1	17221	0	0.22193	0.00061788	0.00023914	0.024305	186	3	0.22193
HPX	4	0.99785	0.99901	1	18919	0	0.3365	0.00062323	0.00023914	0.024305	187	4	0.3365
C9orf135	4	0.99385	0.99727	1	18761	0	0.27718	0.00063988	0.00024536	0.024726	188	4	0.27718
RARB	4	0.49182	0.50481	0.999327	9613	1	0.42544	0.00064649	0.00024588	0.024726	189	3	0.42544
PF4V1	4	0.072092	0.1019	0.623869	3095	2	0.0073092	0.0006605	0.00025935	0.025676	190	2	0.0073092
MORF4L1	4	0.99506	0.99788	1	18808	0	0.386	0.00066239	0.00025935	0.025676	191	4	0.386
ARF1	4	0.78471	0.78829	1	14195	0	0.26107	0.00066678	0.00025935	0.025676	192	2	0.26107
KLF1	4	0.99933	0.99977	1	19003	0	0.19267	0.000669	0.0002692	0.026428	193	4	0.19267
MYLK2	4	0.99932	0.99977	1	19002	0	0.22333	0.00068162	0.00026972	0.026428	194	4	0.22333
UPF3B	4	0.99932	0.99977	1	19001	0	0.28073	0.00068408	0.00027542	0.026849	195	4	0.28073
SLCO4A1	4	0.82089	0.83146	1	14913	0	0.29581	0.000694	0.00029822	0.028257	196	3	0.29581
CST1	4	0.90398	0.91725	1	16549	0	0.2929	0.00070352	0.00029822	0.028257	197	2	0.2929
DNAJC5	4	0.99928	0.99975	1	18997	0	0.37727	0.00071615	0.00029822	0.028257	198	4	0.37727
ELAVL1	4	0.98938	0.99407	1	18603	0	0.26756	0.00071822	0.00029822	0.028257	199	3	0.26756
SIRPB1	4	0.99927	0.99975	1	18996	0	0.16425	0.00072545	0.00029873	0.028257	200	4	0.16425
NMUR2	4	0.99375	0.99722	1	18759	0	0.43309	0.00072806	0.00029873	0.028257	201	4	0.43309
FEZ1	4	0.40665	0.44418	0.965415	8705	1	0.051287	0.00076615	0.00031221	0.029242	202	1	0.051287
PCBP2	4	0.99557	0.998	1	18828	0	0.43775	0.00077396	0.00031221	0.029242	203	4	0.43775
PDGFD	4	0.99922	0.99973	1	18995	0	0.28489	0.00078193	0.00033501	0.03097	204	4	0.28489
RAN	2	0.99921	0.99999	1	18994	0	0.49198	0.00078654	1.0623e-05	0.00301	205	2	0.49198
TOMM34	4	0.8836	0.90135	1	16127	0	0.34355	0.00079734	0.00033553	0.03097	206	3	0.34355
MAU2	4	0.95488	0.96819	1	17725	0	0.2288	0.00080523	0.00034174	0.031393	207	3	0.2288
PXN	4	0.9697	0.98045	1	18074	0	0.27429	0.0008395	0.00035004	0.03146	208	3	0.27429
BRAP	4	0.87747	0.89455	1	16009	0	0.27397	0.00084343	0.00035004	0.03146	209	2	0.27397
C11orf91	4	0.99915	0.99972	1	18990	0	0.21019	0.00084636	0.00035055	0.03146	210	4	0.21019
PROCR	4	0.99915	0.99972	1	18989	0	0.33925	0.00085452	0.00035055	0.03146	211	4	0.33925
NDP	4	0.39972	0.43928	0.964854	8636	1	0.11485	0.0008718	0.00035677	0.03146	212	3	0.11485
PTGR2	4	0.99913	0.99972	1	18988	0	0.23961	0.00087397	0.00035677	0.03146	213	4	0.23961
COL9A3	4	0.93394	0.9487	1	17218	0	0.25106	0.00088083	0.00035729	0.03146	214	3	0.25106
HNRNPAB	4	0.99912	0.99972	1	18987	0	0.21763	0.00088179	0.00035729	0.03146	215	4	0.21763
NIM1K	4	0.99911	0.99972	1	18986	0	0.28821	0.00088504	0.00035729	0.03146	216	4	0.28821
CDC20B	4	0.99908	0.99969	1	18985	0	0.3693	0.00092026	0.0003889	0.033516	217	4	0.3693
B3GNT4	4	0.99908	0.99969	1	18984	0	0.32464	0.00092362	0.0003889	0.033516	218	4	0.32464
SMG7	4	0.51206	0.52947	1	9845	1	0.41138	0.00092814	0.00038942	0.033516	219	3	0.41138
CYB5R4	4	0.99907	0.99969	1	18983	0	0.29624	0.00092923	0.00038942	0.033516	220	4	0.29624
ST3GAL2	4	0.83429	0.84723	1	15162	0	0.21683	0.00093064	0.00038942	0.033516	221	2	0.21683
BPTF	4	0.99906	0.99968	1	18982	0	0.36973	0.0009448	0.00041222	0.034894	222	4	0.36973
NAA25	4	0.99872	0.9995	1	18959	0	0.58964	0.00094798	0.00041222	0.034894	223	4	0.58964
NCOA3	4	0.88429	0.90208	1	16136	0	0.24431	0.0009482	0.00041222	0.034894	224	2	0.24431
C17orf85	4	0.88375	0.90135	1	16131	0	0.38018	0.00095802	0.00041274	0.034894	225	3	0.38018
PRR19	4	0.99904	0.99967	1	18980	0	0.30235	0.00095999	0.00041999	0.035043	226	4	0.30235
EPHX3	4	0.99884	0.99956	1	18964	0	0.28515	0.00096334	0.00041999	0.035043	227	4	0.28515
BTG2	4	0.99902	0.99967	1	18979	0	0.16726	0.00097828	0.00041999	0.035043	228	4	0.16726
EEF1G	4	0.99899	0.99966	1	18978	0	0.36906	0.0010072	0.00042724	0.035493	229	4	0.36906
PLEKHA1	4	0.36532	0.42269	0.96036	8298	1	0.39586	0.0010212	0.00043346	0.035854	230	3	0.39586
ZFP82	4	0.71401	0.70531	1	12872	1	0.10112	0.0010302	0.00045315	0.037161	231	2	0.10112
TM2D3	4	0.997	0.99869	1	18885	0	0.27371	0.0010363	0.00046196	0.037721	232	4	0.27371
CTU2	4	0.99896	0.99963	1	18977	0	0.48925	0.0010396	0.00048062	0.038529	233	4	0.48925
ZSWIM6	4	0.19166	0.25584	0.865428	5576	1	0.43547	0.0010401	0.00048114	0.038529	234	3	0.43547
TRIM68	3	0.99895	0.99969	1	18976	0	0.25363	0.0010485	0.00031687	0.029534	235	3	0.25363
ZC3H14	4	0.99249	0.99616	1	18717	0	0.48038	0.0010487	0.0004915	0.038529	236	4	0.48038
OR5D16	4	0.99838	0.99929	1	18946	0	0.48738	0.0010507	0.0004915	0.038529	237	4	0.48738
SIRPG	4	0.99895	0.99962	1	18975	0	0.21989	0.0010525	0.0004915	0.038529	238	4	0.21989
CCDC105	4	0.99895	0.99962	1	18974	0	0.19952	0.0010548	0.00049202	0.038529	239	4	0.19952
PCDHGA4	4	0.98025	0.98767	1	18363	0	0.49243	0.0010558	0.00049202	0.038529	240	3	0.49243
TMEM138	4	0.99894	0.99962	1	18973	0	0.38868	0.0010615	0.00049202	0.038529	241	4	0.38868
C11orf98	4	0.97166	0.98112	1	18128	0	0.39218	0.0010703	0.00050756	0.039423	242	3	0.39218
CCAR1	4	0.98296	0.98959	1	18430	0	0.31051	0.001071	0.00050756	0.039423	243	3	0.31051
ZNF215	4	0.85744	0.87114	1	15600	0	0.27027	0.001086	0.00052052	0.039663	244	2	0.27027
PPP4C	4	0.97705	0.98575	1	18272	0	0.559	0.0010863	0.00052052	0.039663	245	3	0.559
CTDNEP1	4	0.99889	0.99959	1	18970	0	0.27381	0.0011076	0.00052104	0.039663	246	4	0.27381
FGF3	4	0.99888	0.99959	1	18969	0	0.28559	0.0011169	0.00052104	0.039663	247	4	0.28559
TRPS1	4	0.99888	0.99959	1	18968	0	0.31615	0.0011211	0.00052104	0.039663	248	4	0.31615
NNT	4	0.99887	0.99958	1	18967	0	0.30689	0.0011254	0.0005314	0.040013	249	4	0.30689
BMP7	4	0.99887	0.99958	1	18966	0	0.22398	0.0011289	0.00053192	0.040013	250	4	0.22398
FAM209A	4	0.92432	0.93915	1	16975	0	0.3218	0.0011346	0.00054487	0.040617	251	3	0.3218
SYDE1	4	0.99886	0.99957	1	18965	0	0.14931	0.0011414	0.00054487	0.040617	252	4	0.14931
MOCS2	4	0.45739	0.4785	0.988299	9212	1	0.21199	0.0011779	0.00055057	0.040617	253	2	0.21199
TMED1	4	0.95313	0.96656	1	17670	0	0.26835	0.0011787	0.00055057	0.040617	254	3	0.26835
UBE2R2	4	0.99799	0.99903	1	18926	0	0.37625	0.0011883	0.00055057	0.040617	255	4	0.37625
ARNTL	4	0.68244	0.6708	1	12292	1	0.14105	0.0012175	0.00058581	0.042079	256	2	0.14105
FASTKD3	4	0.74749	0.74632	1	13502	0	0.33656	0.0012178	0.00058581	0.042079	257	3	0.33656
SNX18	4	0.99877	0.99952	1	18962	0	0.29063	0.0012315	0.0005941	0.042515	258	4	0.29063
OR4D11	4	0.99876	0.99951	1	18961	0	0.32043	0.0012448	0.00061327	0.043276	259	4	0.32043
ELP5	4	0.7387	0.73722	1	13340	0	0.32608	0.001257	0.00061379	0.043276	260	3	0.32608
TEK	4	0.99874	0.99951	1	18960	0	0.31425	0.0012645	0.00061379	0.043276	261	4	0.31425
GSS	4	0.99766	0.99899	1	18914	0	0.38319	0.0012665	0.00061379	0.043276	262	4	0.38319
KLC2	4	0.98268	0.98946	1	18425	0	0.22133	0.001274	0.00062726	0.044063	263	3	0.22133
CYP2A6	4	0.14189	0.19024	0.786805	4551	2	-0.12741	0.0012943	0.00064333	0.044572	264	1	-0.12741
P2RX7	4	0.73887	0.73722	1	13344	0	0.3019	0.0013042	0.00064333	0.044572	265	3	0.3019
BPIFA3	4	0.99869	0.99948	1	18958	0	0.22482	0.0013091	0.00064333	0.044572	266	4	0.22482
ZDHHC5	4	0.9946	0.99767	1	18788	0	0.31076	0.0013195	0.00064385	0.044572	267	4	0.31076
SNPH	4	0.94057	0.95595	1	17391	0	0.22559	0.0013407	0.00065577	0.045071	268	3	0.22559
TNPO1	4	0.90591	0.91853	1	16602	0	0.32679	0.0013474	0.00065577	0.045071	269	3	0.32679
PLIN2	4	0.98228	0.98903	1	18414	0	0.30392	0.0013511	0.00066976	0.045254	270	3	0.30392
EPS8L1	4	0.96473	0.97623	1	17962	0	0.35909	0.001354	0.00066976	0.045254	271	3	0.35909
DEFB129	4	0.99864	0.99947	1	18957	0	0.27106	0.0013615	0.00066976	0.045254	272	4	0.27106
CST4	4	0.99119	0.99508	1	18672	0	0.25541	0.0013682	0.00067027	0.045254	273	4	0.25541
CALHM3	4	0.99863	0.99947	1	18956	0	0.29661	0.0013712	0.00067027	0.045254	274	4	0.29661
NOTCH3	4	0.99862	0.99946	1	18955	0	0.30402	0.0013841	0.0007309	0.049001	275	4	0.30402
ZNF146	4	0.69323	0.68377	1	12459	1	0.047006	0.0013999	0.00074645	0.049351	276	2	0.047006
RNF169	4	0.92637	0.94017	1	17026	0	0.23989	0.0014047	0.00074645	0.049351	277	3	0.23989
ABHD17B	4	0.99859	0.99944	1	18954	0	0.16367	0.0014058	0.00074645	0.049351	278	4	0.16367
MAST4	4	0.98974	0.99416	1	18617	0	0.30681	0.0014074	0.00074645	0.049351	279	4	0.30681
OR4A16	4	0.69078	0.68053	1	12421	1	0.23664	0.0014158	0.00077806	0.050946	280	3	0.23664
PPIG	4	0.99858	0.99941	1	18953	0	0.32137	0.0014162	0.00077806	0.050946	281	4	0.32137
NR5A1	4	0.97371	0.9828	1	18181	0	0.18595	0.0014345	0.00077858	0.050946	282	3	0.18595
NEK7	3	0.65246	0.65406	1	11817	0	0.25814	0.0014367	0.00044745	0.036851	283	2	0.25814
DNAJB1	4	0.58764	0.57879	1	10863	1	0.18937	0.0014513	0.00080708	0.052631	284	2	0.18937
CDH18	4	0.9983	0.99925	1	18938	0	0.28687	0.0014848	0.00084853	0.054622	285	4	0.28687
MRGPRE	4	0.99491	0.99784	1	18800	0	0.25107	0.0014888	0.00084853	0.054622	286	4	0.25107
DIABLO	4	0.99461	0.99767	1	18789	0	0.24693	0.0015094	0.00084905	0.054622	287	4	0.24693
CIC	4	0.99849	0.99936	1	18952	0	0.19306	0.0015128	0.00084905	0.054622	288	4	0.19306
HOXA5	4	0.95016	0.96422	1	17603	0	0.43576	0.0015445	0.00088429	0.056508	289	3	0.43576
STRBP	4	0.34596	0.41443	0.958075	8126	1	0.26445	0.001567	0.00091538	0.057891	290	2	0.26445
CBWD3	3	0.99842	0.99954	1	18951	0	0.34747	0.0015761	0.00046922	0.03815	291	3	0.34747
PDZD2	4	0.99463	0.99771	1	18791	0	0.21742	0.0015995	0.00093144	0.057891	292	4	0.21742
DCAF15	4	0.72269	0.71511	1	13036	0	0.37828	0.001602	0.00094336	0.057891	293	3	0.37828
TRAM2	4	0.99839	0.9993	1	18949	0	0.30247	0.0016052	0.00094336	0.057891	294	4	0.30247
NSMAF	4	0.048911	0.065951	0.526367	2380	2	-0.11639	0.0016111	0.00094388	0.057891	295	1	-0.11639
CIRH1A	3	0.99839	0.99954	1	18948	0	0.50631	0.0016129	0.00048165	0.038529	296	3	0.50631
C7orf60	4	0.3541	0.41608	0.958075	8202	1	0.29761	0.0016145	0.00094388	0.057891	297	3	0.29761
MOS	4	0.019615	0.024438	0.375652	1239	2	0.0043287	0.0016175	0.00095787	0.057891	298	2	0.0043287
DSCR3	4	0.60957	0.60023	1	11164	1	0.43019	0.0016178	0.00095787	0.057891	299	3	0.43019
POLD4	4	0.99838	0.99929	1	18947	0	0.27561	0.0016209	0.00095787	0.057891	300	4	0.27561
TFAP2D	4	0.99837	0.99929	1	18945	0	0.22267	0.0016282	0.00095787	0.057891	301	4	0.22267
NUP188	4	0.9978	0.99901	1	18918	0	0.42698	0.0016337	0.00095787	0.057891	302	4	0.42698
OR5B2	4	0.99836	0.99929	1	18944	0	0.34256	0.0016409	0.00095839	0.057891	303	4	0.34256
SESN2	4	0.7631	0.76247	1	13788	0	0.26062	0.0016446	0.00095839	0.057891	304	3	0.26062
LECT2	4	0.99835	0.99929	1	18942	0	0.33646	0.001648	0.00095839	0.057891	305	4	0.33646
ZDHHC12	4	0.99835	0.99929	1	18941	0	0.18311	0.0016515	0.00095839	0.057891	306	4	0.18311
PHACTR3	4	0.95532	0.96819	1	17735	0	0.26941	0.0016559	0.00095839	0.057891	307	3	0.26941
LHFPL2	4	0.85183	0.86661	1	15500	0	0.23702	0.0016632	0.00097341	0.058304	308	3	0.23702
KIAA0754	4	0.55891	0.56076	1	10449	1	0.16089	0.0016638	0.00097341	0.058304	309	2	0.16089
PPP4R2	4	0.99832	0.99925	1	18940	0	0.2561	0.0016833	0.00099673	0.058992	310	4	0.2561
SV2C	4	0.99831	0.99925	1	18939	0	0.1936	0.0016917	0.00099673	0.058992	311	4	0.1936
SRSF6	4	0.99829	0.99925	1	18937	0	0.27056	0.0017078	0.00099725	0.058992	312	4	0.27056
GGTLC1	4	0.99828	0.99925	1	18936	0	0.20619	0.0017225	0.0010159	0.059756	313	4	0.20619
OR2Z1	4	0.23501	0.3076	0.904609	6435	1	0.24238	0.0017419	0.0010164	0.059756	314	2	0.24238
CLEC11A	4	0.99825	0.99923	1	18935	0	0.28765	0.0017461	0.0010356	0.060697	315	4	0.28765
BABAM1	4	0.99606	0.99837	1	18844	0	0.36996	0.0017552	0.0010517	0.061262	316	4	0.36996
TLE4	4	0.97815	0.98607	1	18307	0	0.32567	0.0017795	0.0010765	0.061799	317	3	0.32567
RTBDN	4	0.66265	0.65108	1	11988	1	0.27408	0.0017822	0.0010771	0.061799	318	3	0.27408
OR4C6	4	0.72611	0.72	1	13103	0	0.25991	0.0017831	0.0010771	0.061799	319	3	0.25991
GALNT18	4	0.99821	0.99919	1	18934	0	0.32717	0.0017866	0.0010771	0.061799	320	4	0.32717
ZNF90	4	0.3392	0.41287	0.958075	8067	1	0.26343	0.0017951	0.0010771	0.061799	321	2	0.26343
TFB2M	4	0.82069	0.83146	1	14910	0	0.39872	0.0018112	0.0010947	0.062279	322	2	0.39872
SCGB3A2	4	0.99818	0.99917	1	18933	0	0.28107	0.0018237	0.0010952	0.062279	323	4	0.28107
COX6A1	4	0.89331	0.90567	1	16324	0	0.27525	0.0018355	0.0010952	0.062279	324	3	0.27525
PGAM5	4	0.99816	0.99917	1	18932	0	0.18119	0.0018429	0.0011118	0.062692	325	4	0.18119
PALM3	3	0.31317	0.32458	0.913698	7844	1	0.35094	0.0018524	0.00053088	0.040013	326	2	0.35094
CDKN1C	4	0.99605	0.99837	1	18843	0	0.24588	0.0018541	0.0011118	0.062692	327	4	0.24588
CDH22	4	0.81328	0.82143	1	14758	0	0.22526	0.001875	0.0011123	0.062692	328	3	0.22526
TBXA2R	4	0.81855	0.82924	1	14866	0	0.19672	0.0019149	0.0011532	0.064808	329	3	0.19672
RAE1	3	0.97466	0.98505	1	18203	0	0.76308	0.0019248	0.00057234	0.04146	330	3	0.76308
HOOK2	4	0.99806	0.99913	1	18931	0	0.20433	0.0019431	0.001176	0.065895	331	4	0.20433
NOD2	4	0.99804	0.99911	1	18930	0	0.32774	0.0019568	0.0011978	0.066723	332	4	0.32774
BRD7	4	0.9893	0.99407	1	18601	0	0.36291	0.0019622	0.0011978	0.066723	333	3	0.36291
LYPD6	4	0.37014	0.426	0.96036	8336	1	0.20834	0.0019805	0.0012232	0.067576	334	2	0.20834
MTMR12	3	0.99801	0.99945	1	18929	0	0.31396	0.0019886	0.00057286	0.04146	335	3	0.31396
MIR1-1HG	4	0.81015	0.81797	1	14699	0	0.21695	0.0019912	0.0012237	0.067576	336	3	0.21695
YPEL4	4	0.96502	0.97673	1	17965	0	0.25974	0.001995	0.0012237	0.067576	337	3	0.25974
PWP1	3	0.97416	0.98384	1	18195	0	0.4318	0.0019965	0.00057286	0.04146	338	3	0.4318
NRXN2	4	0.998	0.99906	1	18928	0	0.37738	0.0020035	0.0012693	0.069719	339	4	0.37738
DPP9	4	0.99799	0.99906	1	18927	0	0.33351	0.002006	0.0012698	0.069719	340	4	0.33351
CT47A4	4	0.99188	0.99554	1	18697	0	0.24933	0.0020075	0.0012937	0.06979	341	4	0.24933
ZFP3	4	0.67086	0.6626	1	12115	1	0.12216	0.00201	0.0012937	0.06979	342	2	0.12216
BCLAF1	3	0.99798	0.99945	1	18925	0	0.36015	0.0020172	0.00057286	0.04146	343	3	0.36015
STRAP	4	0.92992	0.94408	1	17114	0	0.33579	0.0020333	0.0013108	0.06979	344	2	0.33579
ARHGAP29	4	0.99797	0.99903	1	18924	0	0.39941	0.0020339	0.0013108	0.06979	345	4	0.39941
RBM12	4	0.99109	0.995	1	18666	0	0.28802	0.0020555	0.0013108	0.06979	346	4	0.28802
KEAP1	4	0.59729	0.59034	1	10988	1	0.18281	0.0020584	0.0013113	0.06979	347	3	0.18281
BMP2	4	0.99792	0.99903	1	18923	0	0.22626	0.0020822	0.0013113	0.06979	348	4	0.22626
CALR	4	0.89629	0.90777	1	16378	0	0.22166	0.0020822	0.0013113	0.06979	349	3	0.22166
PCNXL3	4	0.98691	0.99215	1	18525	0	0.25465	0.0020852	0.0013113	0.06979	350	3	0.25465
USP5	4	0.99791	0.99903	1	18922	0	0.21949	0.0020878	0.0013113	0.06979	351	4	0.21949
SCARB1	4	0.96595	0.97697	1	17993	0	0.3122	0.0020891	0.0013113	0.06979	352	3	0.3122
RRBP1	4	0.78866	0.79352	1	14269	0	0.24946	0.0021045	0.0013569	0.071057	353	3	0.24946
KCNS1	4	0.99789	0.99901	1	18921	0	0.21243	0.0021127	0.0013569	0.071057	354	4	0.21243
IFITM10	4	0.99786	0.99901	1	18920	0	0.27608	0.0021352	0.0013574	0.071057	355	4	0.27608
OR10H5	4	0.70407	0.69708	1	12670	1	0.065239	0.0021388	0.0013574	0.071057	356	2	0.065239
EHMT2	4	0.59507	0.58867	1	10959	1	0.1584	0.0021422	0.0013574	0.071057	357	2	0.1584
GINS1	4	0.99478	0.9978	1	18796	0	0.51781	0.0021669	0.0013574	0.071057	358	4	0.51781
HNRNPA2B1	3	0.96695	0.97871	1	18014	0	0.57219	0.0021687	0.00072157	0.048546	359	2	0.57219
NAIP	4	0.75353	0.75378	1	13622	0	0.33481	0.002183	0.0013807	0.07208	360	3	0.33481
OPRL1	4	0.97508	0.98375	1	18219	0	0.18543	0.002204	0.0014045	0.072926	361	2	0.18543
FST	4	0.96802	0.97978	1	18040	0	0.34646	0.0022475	0.0014279	0.073736	362	3	0.34646
ZCCHC6	4	0.98936	0.99407	1	18602	0	0.25987	0.0022568	0.0014279	0.073736	363	3	0.25987
FANCE	4	0.97474	0.98375	1	18206	0	0.2736	0.0022995	0.0014807	0.075633	364	3	0.2736
TFCP2	4	0.99769	0.99899	1	18916	0	0.22563	0.0023105	0.0014963	0.075633	365	4	0.22563
ANHX	4	0.99769	0.99899	1	18915	0	0.25597	0.0023105	0.0014963	0.075633	366	4	0.25597
SLC2A10	4	0.99667	0.99856	1	18871	0	0.26181	0.0023216	0.0014963	0.075633	367	4	0.26181
TPX2	4	0.95936	0.97256	1	17832	0	0.51356	0.0023224	0.0014963	0.075633	368	3	0.51356
OR10V1	3	0.94523	0.96112	1	17492	0	0.41929	0.002348	0.00086511	0.055469	369	2	0.41929
EP300	4	0.97753	0.9859	1	18288	0	0.2673	0.0023715	0.0015237	0.076022	370	3	0.2673
SEC14L3	4	0.99762	0.99899	1	18913	0	0.17999	0.0023809	0.0015242	0.076022	371	4	0.17999
RASEF	4	0.99761	0.99899	1	18912	0	0.25901	0.0023906	0.0015242	0.076022	372	4	0.25901
MKNK2	4	0.98078	0.988	1	18376	0	0.32285	0.0024027	0.0015512	0.076022	373	3	0.32285
ACADS	4	0.98488	0.99062	1	18474	0	0.32182	0.0024113	0.0015512	0.076022	374	3	0.32182
PLCB4	4	0.99757	0.99899	1	18911	0	0.26312	0.0024326	0.0015512	0.076022	375	4	0.26312
KLK4	4	0.99757	0.99899	1	18910	0	0.19069	0.0024343	0.0015517	0.076022	376	4	0.19069
PRKCDBP	4	0.96909	0.98024	1	18062	0	0.39009	0.0024346	0.0015517	0.076022	377	3	0.39009
PFDN1	4	0.93108	0.94649	1	17147	0	0.41353	0.0024548	0.0015517	0.076022	378	3	0.41353
SEC23B	4	0.9973	0.99886	1	18898	0	0.31195	0.0024613	0.0015517	0.076022	379	4	0.31195
PAOX	4	0.99753	0.99899	1	18909	0	0.22483	0.002466	0.0015517	0.076022	380	4	0.22483
OR5B17	4	0.99753	0.99896	1	18908	0	0.35517	0.0024728	0.0016082	0.077817	381	4	0.35517
SLC25A23	4	0.97904	0.9866	1	18334	0	0.24086	0.0024988	0.0016087	0.077817	382	3	0.24086
EMG1	4	0.67113	0.6626	1	12122	1	0.37185	0.0025065	0.0016087	0.077817	383	3	0.37185
APPL1	4	0.99749	0.99896	1	18906	0	0.15684	0.0025099	0.0016087	0.077817	384	4	0.15684
WDR73	4	0.9922	0.99576	1	18705	0	0.26077	0.0025176	0.0016305	0.078472	385	4	0.26077
TMEM41B	4	0.98513	0.99076	1	18481	0	0.43196	0.0025223	0.0016305	0.078472	386	3	0.43196
USP35	4	0.99746	0.99892	1	18905	0	0.23924	0.0025367	0.0016543	0.078654	387	4	0.23924
NUP155	3	0.99746	0.99906	1	18904	0	0.36698	0.0025396	0.00098637	0.058895	388	3	0.36698
MS4A6E	4	0.99458	0.99767	1	18785	0	0.24617	0.0025477	0.0016543	0.078654	389	4	0.24617
MMP16	4	0.59114	0.58373	1	10914	1	0.21537	0.0025508	0.0016543	0.078654	390	3	0.21537
MTRNR2L3	4	0.9344	0.94913	1	17230	0	0.30387	0.0025657	0.0016548	0.078654	391	3	0.30387
PHLDB1	4	0.99743	0.99892	1	18903	0	0.21996	0.0025697	0.0016548	0.078654	392	4	0.21996
MAP3K1	4	0.98725	0.99248	1	18535	0	0.28966	0.0025826	0.0016849	0.079514	393	3	0.28966
SAMHD1	4	0.99741	0.99889	1	18902	0	0.19968	0.0025878	0.0016849	0.079514	394	4	0.19968
NPLOC4	3	0.80975	0.82678	1	14689	0	0.64462	0.0025934	0.0010506	0.061262	395	2	0.64462
KCTD14	4	0.053109	0.072908	0.545227	2536	1	0.26057	0.0025951	0.0016854	0.079514	396	3	0.26057
CPSF4	4	0.99651	0.99852	1	18864	0	0.31087	0.0026084	0.0017129	0.080412	397	4	0.31087
RALGAPB	4	0.90247	0.91725	1	16514	0	0.404	0.002619	0.0017129	0.080412	398	3	0.404
PPME1	4	0.99736	0.99886	1	18901	0	0.21086	0.0026416	0.0017383	0.081031	399	4	0.21086
ACOT8	4	0.75199	0.7508	1	13589	0	0.26829	0.0026441	0.0017383	0.081031	400	3	0.26829
CCDC40	4	0.99733	0.99886	1	18900	0	0.19911	0.0026713	0.0017388	0.081031	401	4	0.19911
FBXL12	4	0.79786	0.80353	1	14458	0	0.18947	0.0026795	0.0017688	0.082231	402	2	0.18947
MYL9	4	0.9973	0.99886	1	18899	0	0.24536	0.0026981	0.0017968	0.083329	403	4	0.24536
CDH2	4	0.89943	0.91256	1	16446	0	0.36187	0.0027147	0.001858	0.085156	404	3	0.36187
RABL2B	4	0.99728	0.99883	1	18897	0	0.19603	0.002716	0.001858	0.085156	405	4	0.19603
PRDM11	4	0.99728	0.99883	1	18896	0	0.25074	0.0027188	0.001858	0.085156	406	4	0.25074
HELZ2	4	0.99726	0.99883	1	18895	0	0.20203	0.0027447	0.0018585	0.085156	407	4	0.20203
IL31RA	4	0.9808	0.988	1	18377	0	0.2955	0.0027487	0.0018585	0.085156	408	3	0.2955
ARG2	4	0.98742	0.99291	1	18541	0	0.34113	0.0027714	0.0018833	0.085666	409	3	0.34113
ADAMTS7	4	0.65379	0.64611	1	11838	1	0.068537	0.0027719	0.0018833	0.085666	410	1	0.068537
ABCB9	4	0.9946	0.99767	1	18787	0	0.31824	0.002778	0.0019139	0.085666	411	4	0.31824
MPV17L2	4	0.82922	0.84207	1	15072	0	0.31056	0.002783	0.0019139	0.085666	412	3	0.31056
ADCY5	4	0.6519	0.64444	1	11809	1	0.23291	0.0027847	0.0019139	0.085666	413	2	0.23291
RNF114	4	0.99721	0.99881	1	18894	0	0.25394	0.0027938	0.0019139	0.085666	414	4	0.25394
DNM1	4	0.99117	0.99508	1	18670	0	0.22924	0.0028179	0.0019144	0.085666	415	4	0.22924
ANKK1	4	0.99717	0.99881	1	18893	0	0.2326	0.0028313	0.0019144	0.085666	416	4	0.2326
H1F0	4	0.99716	0.99881	1	18892	0	0.1969	0.0028358	0.0019144	0.085666	417	4	0.1969
PURB	4	0.99716	0.99881	1	18891	0	0.21925	0.002841	0.0019144	0.085666	418	4	0.21925
ACER1	4	0.99714	0.99878	1	18890	0	0.25655	0.0028619	0.0019543	0.086777	419	4	0.25655
ZNF101	4	0.93565	0.94955	1	17263	0	0.33222	0.0028682	0.0019543	0.086777	420	2	0.33222
NF2	4	0.96988	0.98045	1	18081	0	0.28055	0.0028693	0.0019543	0.086777	421	3	0.28055
GADD45GIP1	4	0.99709	0.99875	1	18889	0	0.25374	0.0029106	0.0020139	0.088483	422	4	0.25374
SIGIRR	4	0.98895	0.99377	1	18590	0	0.18584	0.0029167	0.0020139	0.088483	423	3	0.18584
SPATA2	4	0.99708	0.99875	1	18888	0	0.2121	0.0029232	0.0020139	0.088483	424	4	0.2121
RFPL4A	4	0.92687	0.94067	1	17046	0	0.30466	0.0029351	0.0020145	0.088483	425	3	0.30466
BHMT	4	0.99704	0.99875	1	18887	0	0.20423	0.0029599	0.0020476	0.089551	426	4	0.20423
C5orf15	4	0.99703	0.99875	1	18886	0	0.21427	0.0029686	0.0020481	0.089551	427	4	0.21427
OR7C2	4	0.95811	0.97058	1	17806	0	0.21877	0.0029808	0.0020761	0.090141	428	3	0.21877
SSB	4	0.62778	0.62304	1	11435	1	0.13324	0.0029829	0.0020761	0.090141	429	2	0.13324
UBE2C	4	0.997	0.99869	1	18884	0	0.25207	0.0030037	0.0021036	0.090141	430	4	0.25207
EIF4ENIF1	4	0.99039	0.99457	1	18640	0	0.48296	0.0030077	0.0021036	0.090141	431	4	0.48296
MTG2	4	0.99699	0.99869	1	18883	0	0.38897	0.0030098	0.0021041	0.090141	432	4	0.38897
F8A1	4	0.72053	0.71351	1	12990	0	0.23814	0.0030182	0.0021041	0.090141	433	3	0.23814
TMEM187	4	0.99698	0.99869	1	18882	0	0.22435	0.0030248	0.0021041	0.090141	434	4	0.22435
RNF214	4	0.19391	0.25691	0.865428	5625	1	0.25198	0.0030282	0.0021041	0.090141	435	3	0.25198
RNF103	4	0.16585	0.22406	0.833978	5049	2	-0.11037	0.0030356	0.0021269	0.090711	436	1	-0.11037
PDE6A	4	0.83141	0.84416	1	15111	0	0.27179	0.0030458	0.0021269	0.090711	437	3	0.27179
DDX19A	3	0.99321	0.99669	1	18739	0	0.37939	0.0030724	0.0013854	0.072126	438	3	0.37939
GDNF	4	0.99691	0.99867	1	18881	0	0.3305	0.0030877	0.0021621	0.09142	439	4	0.3305
EMILIN3	4	0.99637	0.99852	1	18854	0	0.22038	0.0031048	0.0021621	0.09142	440	4	0.22038
OSER1	3	0.7971	0.82077	1	14444	0	0.33451	0.0031122	0.0014615	0.075096	441	2	0.33451
FAU	3	0.99689	0.99859	1	18880	0	0.48817	0.003113	0.0014621	0.075096	442	3	0.48817
AP3S2	4	0.77942	0.78033	1	14098	0	0.3538	0.0031188	0.0021627	0.09142	443	2	0.3538
C16orf13	4	0.99133	0.99516	1	18679	0	0.28189	0.0031399	0.0021886	0.092108	444	4	0.28189
KDM1B	4	0.19328	0.25691	0.865428	5612	1	-0.023837	0.0031411	0.0021886	0.092108	445	1	-0.023837
ERVV-1	4	0.99684	0.99864	1	18878	0	0.26989	0.0031557	0.0022202	0.09305	446	4	0.26989
WFDC9	4	0.99682	0.99864	1	18877	0	0.16349	0.0031797	0.0022207	0.09305	447	4	0.16349
ZFP57	4	0.99681	0.99862	1	18876	0	0.23253	0.0031896	0.0022466	0.093746	448	4	0.23253
IFNA2	4	0.99679	0.99862	1	18875	0	0.19649	0.0032067	0.0022471	0.093746	449	4	0.19649
E2F4	4	0.99678	0.99861	1	18874	0	0.1244	0.0032217	0.0022938	0.09468	450	4	0.1244
DUSP9	4	0.34237	0.41443	0.958075	8099	1	0.15633	0.0032319	0.0022938	0.09468	451	2	0.15633
PIGU	4	0.97299	0.98177	1	18164	0	0.23349	0.003233	0.0022938	0.09468	452	3	0.23349
OR4S1	4	0.82585	0.83895	1	15015	0	0.21496	0.0032435	0.0022943	0.09468	453	3	0.21496
SLC26A11	4	0.94282	0.95674	1	17440	0	0.29718	0.0032599	0.0023259	0.094825	454	3	0.29718
CDC37	2	0.75139	0.78359	1	13582	0	0.45452	0.003261	0.00055316	0.040651	455	1	0.45452
PCDHB4	3	0.35428	0.35799	0.92899	8205	1	0.41174	0.0032779	0.0014859	0.075633	456	2	0.41174
ARL6IP4	4	0.99358	0.99722	1	18749	0	0.2844	0.003283	0.0023508	0.094825	457	4	0.2844
DEFB132	4	0.99079	0.99475	1	18657	0	0.35315	0.0033061	0.0023513	0.094825	458	4	0.35315
BIRC7	4	0.99669	0.99856	1	18873	0	0.2731	0.0033149	0.0023513	0.094825	459	4	0.2731
MAP7D1	4	0.99668	0.99856	1	18872	0	0.13593	0.0033207	0.0023513	0.094825	460	4	0.13593
FEN1	3	0.70044	0.70827	1	12590	0	0.14994	0.0033458	0.0015237	0.076022	461	2	0.14994
CDYL	4	0.99665	0.99856	1	18870	0	0.19914	0.0033508	0.0023953	0.094825	462	4	0.19914
PLXNC1	4	0.98766	0.99308	1	18552	0	0.22861	0.0033579	0.0023953	0.094825	463	3	0.22861
ZNF782	4	0.99663	0.99856	1	18869	0	0.16554	0.0033715	0.0023953	0.094825	464	4	0.16554
XPO4	4	0.99257	0.99629	1	18718	0	0.23177	0.0033943	0.0023958	0.094825	465	4	0.23177
GNA14	4	0.86927	0.88821	1	15857	0	0.21397	0.0034047	0.0023958	0.094825	466	3	0.21397
C5orf28	4	0.99657	0.99856	1	18868	0	0.19604	0.003425	0.0023958	0.094825	467	4	0.19604
FBLN1	4	0.63573	0.63285	1	11554	1	0.33647	0.0034385	0.0024306	0.094825	468	3	0.33647
CYB5R2	4	0.99655	0.99852	1	18867	0	0.33422	0.0034453	0.0024306	0.094825	469	4	0.33422
OTUD7A	3	0.48496	0.47062	0.97887	9525	1	0.47871	0.0034557	0.0015569	0.076081	470	2	0.47871
TM6SF2	4	0.99654	0.99852	1	18866	0	0.18796	0.0034626	0.0024311	0.094825	471	4	0.18796
KIF3B	4	0.99515	0.998	1	18809	0	0.33448	0.0034754	0.0024311	0.094825	472	4	0.33448
BLID	4	0.99652	0.99852	1	18865	0	0.20538	0.0034845	0.002471	0.094825	473	4	0.20538
CRB2	4	0.99651	0.99852	1	18863	0	0.18072	0.0034944	0.002471	0.094825	474	4	0.18072
SLC25A48	4	0.99649	0.99852	1	18862	0	0.22243	0.003505	0.002471	0.094825	475	4	0.22243
SVIP	4	0.85451	0.86936	1	15540	0	0.16984	0.0035101	0.002471	0.094825	476	3	0.16984
RBMS1	4	0.91155	0.92589	1	16718	0	0.47953	0.003512	0.002471	0.094825	477	3	0.47953
CDH26	4	0.78172	0.78435	1	14147	0	0.19112	0.0035157	0.002471	0.094825	478	2	0.19112
GLYATL1	4	0.36543	0.42269	0.96036	8299	1	0.26511	0.003518	0.002471	0.094825	479	3	0.26511
NLRP5	4	0.99647	0.99852	1	18861	0	0.21632	0.0035348	0.002471	0.094825	480	4	0.21632
TRIM49D2	4	0.98767	0.99308	1	18553	0	0.23712	0.0035679	0.0024715	0.094825	481	3	0.23712
RFX4	4	0.99643	0.99852	1	18860	0	0.19722	0.0035733	0.0024715	0.094825	482	4	0.19722
HIST1H2AH	4	0.99641	0.99852	1	18859	0	0.28814	0.0035872	0.0024715	0.094825	483	4	0.28814
ORAI1	4	0.68549	0.67403	1	12347	1	0.22218	0.0035904	0.0024715	0.094825	484	3	0.22218
ZBTB14	4	0.99641	0.99852	1	18858	0	0.16426	0.0035942	0.0024715	0.094825	485	4	0.16426
SNW1	4	0.72663	0.72	1	13116	0	0.31512	0.0036054	0.0024715	0.094825	486	2	0.31512
DDA1	4	0.75914	0.75816	1	13724	0	0.27636	0.0036091	0.0024715	0.094825	487	3	0.27636
TAF1L	4	0.99639	0.99852	1	18857	0	0.35618	0.0036121	0.0024715	0.094825	488	4	0.35618
BET1L	4	0.26438	0.34448	0.922211	7033	2	-0.053539	0.0036155	0.0024715	0.094825	489	1	-0.053539
FAM89B	4	0.99637	0.99852	1	18855	0	0.20982	0.00363	0.0024715	0.094825	490	4	0.20982
RBMY1B	4	0.99635	0.99848	1	18853	0	0.2365	0.0036457	0.0025067	0.095984	491	4	0.2365
TFAP2B	4	0.99634	0.99845	1	18851	0	0.1615	0.0036614	0.0025446	0.096677	492	4	0.1615
PSMD13	4	0.9963	0.99845	1	18850	0	0.51003	0.0036989	0.0025446	0.096677	493	4	0.51003
HYPK	4	0.95417	0.96786	1	17706	0	0.53407	0.0037091	0.0025446	0.096677	494	3	0.53407
PATE4	4	0.78971	0.79734	1	14291	0	0.034231	0.003721	0.0025451	0.096677	495	1	0.034231
TMEM132C	4	0.9962	0.99841	1	18848	0	0.16114	0.0037978	0.0026181	0.098107	496	4	0.16114
NUDT5	4	0.98714	0.99239	1	18531	0	0.30008	0.0038043	0.0026181	0.098107	497	3	0.30008
ERP29	4	0.97233	0.98155	1	18142	0	0.20807	0.0038086	0.0026181	0.098107	498	3	0.20807
TM9SF4	4	0.59152	0.58373	1	10919	1	0.30502	0.0038149	0.0026181	0.098107	499	3	0.30502
SCAI	4	0.23807	0.31263	0.911004	6486	1	0.20543	0.0038264	0.0026187	0.098107	500	2	0.20543
DEPDC1B	4	0.96728	0.9791	1	18021	0	0.2526	0.0038305	0.0026187	0.098107	501	3	0.2526
ATP2B1	4	0.98906	0.99377	1	18592	0	0.24636	0.0038671	0.0026591	0.09883	502	3	0.24636
BST2	4	0.41457	0.44747	0.965782	8780	1	0.042423	0.0038791	0.0026596	0.09883	503	2	0.042423
WFDC12	4	0.52347	0.53776	1	9974	1	0.21368	0.0038921	0.0026596	0.09883	504	3	0.21368
FIZ1	4	0.9961	0.99837	1	18847	0	0.19286	0.0039032	0.0027047	0.09883	505	4	0.19286
MAN2B1	4	0.99608	0.99837	1	18845	0	0.30772	0.0039164	0.0027047	0.09883	506	4	0.30772
DUSP27	4	0.54058	0.54599	1	10201	1	0.01586	0.0039318	0.0027047	0.09883	507	1	0.01586
NUDT12	4	0.99147	0.99523	1	18682	0	0.40398	0.0039335	0.0027047	0.09883	508	4	0.40398
BRSK2	4	0.73644	0.73722	1	13297	0	0.29412	0.0039618	0.0027047	0.09883	509	3	0.29412
DDX4	4	0.90007	0.91324	1	16460	0	0.29499	0.0039797	0.0027052	0.09883	510	3	0.29499
OR4C13	4	0.68733	0.67732	1	12374	1	0.27589	0.0039812	0.0027052	0.09883	511	3	0.27589
LIN37	4	0.99215	0.99569	1	18704	0	0.20914	0.0040202	0.0027052	0.09883	512	4	0.20914
RNASEH2A	4	0.99597	0.99837	1	18842	0	0.19963	0.004031	0.0027052	0.09883	513	4	0.19963
FZD6	4	0.87796	0.89537	1	16022	0	0.090854	0.0040372	0.0027052	0.09883	514	2	0.090854
WFDC10B	4	0.99595	0.99834	1	18841	0	0.15573	0.0040471	0.0027378	0.099832	515	4	0.15573
PRKAB1	4	0.99591	0.9983	1	18840	0	0.16642	0.0040854	0.002771	0.100657	516	4	0.16642
NUP160	4	0.97325	0.98239	1	18168	0	0.25835	0.0040899	0.002771	0.100657	517	2	0.25835
GPR137	4	0.9859	0.99113	1	18499	0	0.38129	0.0040938	0.0028042	0.101668	518	3	0.38129
CCDC88B	4	0.99589	0.99819	1	18839	0	0.24057	0.0041093	0.0028793	0.103043	519	4	0.24057
CENPQ	4	0.79654	0.80353	1	14434	0	0.31661	0.0041138	0.0028793	0.103043	520	3	0.31661
WDPCP	4	0.99588	0.99819	1	18838	0	0.17539	0.0041162	0.0028793	0.103043	521	4	0.17539
U2AF2	3	0.49235	0.48078	0.99071	9616	1	0.46708	0.0041232	0.0019574	0.086777	522	2	0.46708
COMT	4	0.99587	0.99819	1	18837	0	0.24385	0.0041317	0.0028798	0.103043	523	4	0.24385
ITPA	4	0.99586	0.99819	1	18836	0	0.19862	0.004136	0.0028798	0.103043	524	4	0.19862
CORO2B	4	0.01153	0.014789	0.315016	892	2	-0.077265	0.0041425	0.0028798	0.103043	525	1	-0.077265
TNPO2	4	0.99534	0.998	1	18819	0	0.2051	0.0041572	0.0029135	0.103491	526	4	0.2051
LCE3C	4	0.57488	0.57226	1	10665	1	0.31062	0.0041881	0.002914	0.103491	527	3	0.31062
NXPE1	4	0.9958	0.99815	1	18835	0	0.14655	0.0042001	0.002914	0.103491	528	4	0.14655
OAS1	4	0.99579	0.99815	1	18834	0	0.22299	0.0042062	0.002914	0.103491	529	4	0.22299
CARD9	4	0.70761	0.69872	1	12736	1	0.35321	0.0042144	0.0029487	0.103778	530	3	0.35321
ZBTB46	4	0.99503	0.99788	1	18806	0	0.22778	0.0042237	0.0029487	0.103778	531	4	0.22778
TP53I11	4	0.97739	0.98575	1	18285	0	0.18721	0.0042479	0.0029493	0.103778	532	3	0.18721
KPNA4	4	0.47351	0.49165	0.995024	9399	1	0.25223	0.0042551	0.0029493	0.103778	533	2	0.25223
CBWD1	2	0.99571	0.99904	1	18833	0	0.39815	0.0042857	0.00095994	0.057891	534	2	0.39815
ZSWIM4	4	0.65032	0.64444	1	11786	1	0.12252	0.0042919	0.0030187	0.10585	535	2	0.12252
TAS2R1	4	0.99571	0.99805	1	18832	0	0.15623	0.0042942	0.0030192	0.10585	536	4	0.15623
RIC3	4	0.99569	0.99805	1	18831	0	0.27467	0.0043129	0.0030674	0.10623	537	4	0.27467
POLR3K	3	0.99568	0.99808	1	18830	0	0.34442	0.0043186	0.0021031	0.090141	538	3	0.34442
ZNFX1	4	0.9054	0.91853	1	16590	0	0.25257	0.0043246	0.0030674	0.10623	539	3	0.25257
TSPAN4	4	0.99564	0.998	1	18829	0	0.14898	0.0043593	0.0031083	0.10623	540	4	0.14898
FAM222A	4	0.97864	0.98625	1	18322	0	0.36673	0.0043683	0.0031607	0.10623	541	3	0.36673
PRDX6	4	0.96525	0.97673	1	17976	0	0.29571	0.0043822	0.0031607	0.10623	542	2	0.29571
BASP1	4	0.82545	0.83787	1	15005	0	0.28703	0.004405	0.0031607	0.10623	543	3	0.28703
NDUFB7	4	0.30594	0.38987	0.945944	7780	1	0.20115	0.004406	0.0031607	0.10623	544	3	0.20115
CCDC151	4	0.70954	0.70205	1	12776	1	0.2423	0.0044114	0.0031607	0.10623	545	3	0.2423
PTGES3	4	0.97505	0.98375	1	18218	0	0.20493	0.0044319	0.0031612	0.10623	546	3	0.20493
PPP2R2B	4	0.99556	0.998	1	18827	0	0.14849	0.0044415	0.0031612	0.10623	547	4	0.14849
TUBB4A	4	0.75294	0.75229	1	13603	0	0.18973	0.0044568	0.0031612	0.10623	548	2	0.18973
OTUB1	4	0.99554	0.998	1	18826	0	0.2071	0.004457	0.0031612	0.10623	549	4	0.2071
IFNA21	4	0.99552	0.998	1	18825	0	0.20653	0.0044835	0.003213	0.10623	550	4	0.20653
PSMD4	4	0.98899	0.99377	1	18591	0	0.31706	0.0044985	0.003213	0.10623	551	2	0.31706
KNTC1	3	0.99548	0.99802	1	18824	0	0.40788	0.0045171	0.0021585	0.09142	552	3	0.40788
MLEC	4	0.99547	0.998	1	18823	0	0.36171	0.0045285	0.003213	0.10623	553	4	0.36171
MKKS	4	0.99547	0.998	1	18822	0	0.20595	0.0045304	0.003213	0.10623	554	4	0.20595
OGFR	4	0.93525	0.94955	1	17251	0	0.29567	0.0045617	0.003213	0.10623	555	3	0.29567
CERCAM	4	0.96684	0.97865	1	18010	0	0.21682	0.0045666	0.003213	0.10623	556	3	0.21682
MMP26	4	0.99543	0.998	1	18821	0	0.27641	0.0045683	0.003213	0.10623	557	4	0.27641
NR1H3	4	0.67187	0.6626	1	12132	1	0.25607	0.0045715	0.003213	0.10623	558	3	0.25607
JUND	4	0.99542	0.998	1	18820	0	0.17686	0.0045767	0.003213	0.10623	559	4	0.17686
ARFIP2	4	0.96318	0.97518	1	17930	0	0.2745	0.0046059	0.0032135	0.10623	560	3	0.2745
EIF4E1B	4	0.9865	0.99158	1	18513	0	0.24608	0.0046141	0.0032135	0.10623	561	3	0.24608
SPEF2	4	0.99533	0.998	1	18818	0	0.23413	0.0046661	0.0032135	0.10623	562	4	0.23413
ZNF621	4	0.99533	0.998	1	18817	0	0.17428	0.0046685	0.0032135	0.10623	563	4	0.17428
ANGPT2	4	0.10939	0.14627	0.720324	3866	1	-0.083036	0.0046693	0.0032135	0.10623	564	1	-0.083036
NPR3	4	0.39404	0.43597	0.96036	8579	1	0.23337	0.0046928	0.0032135	0.10623	565	3	0.23337
PRR3	4	0.9953	0.998	1	18816	0	0.18732	0.0047007	0.0032135	0.10623	566	4	0.18732
BTG4	4	0.9953	0.998	1	18815	0	0.21454	0.004703	0.0032135	0.10623	567	4	0.21454
SPPL3	4	0.97931	0.98676	1	18341	0	0.28291	0.0047036	0.0032135	0.10623	568	3	0.28291
OR7E24	2	0.9953	0.99904	1	18814	0	0.44647	0.0047038	0.00096046	0.057891	569	2	0.44647
SLC15A2	4	0.9728	0.98177	1	18157	0	0.21132	0.0047069	0.0032135	0.10623	570	3	0.21132
BRMS1	3	0.99526	0.99792	1	18813	0	0.23051	0.0047361	0.0022585	0.094016	571	3	0.23051
TXNL4B	4	0.99526	0.998	1	18812	0	0.26112	0.0047378	0.0032503	0.106899	572	4	0.26112
PPM1N	4	0.96274	0.9749	1	17911	0	0.21424	0.0047454	0.0032503	0.106899	573	3	0.21424
CAPN5	4	0.89071	0.90281	1	16266	0	0.23551	0.0047722	0.0032892	0.106899	574	3	0.23551
SMG8	4	0.94143	0.95636	1	17410	0	0.1032	0.0047747	0.0032892	0.106899	575	3	0.1032
WT1	4	0.73009	0.72483	1	13178	0	0.17248	0.0048059	0.0032892	0.106899	576	3	0.17248
MORC4	4	0.99518	0.998	1	18811	0	0.16365	0.0048204	0.0032897	0.106899	577	4	0.16365
PTEN	4	0.98735	0.99291	1	18538	0	0.28007	0.0048212	0.0032897	0.106899	578	3	0.28007
CSH2	4	0.19681	0.26137	0.872471	5675	2	-0.084665	0.0048273	0.0032897	0.106899	579	1	-0.084665
HDLBP	4	0.99515	0.998	1	18810	0	0.23265	0.004848	0.0032897	0.106899	580	4	0.23265
SLC5A5	4	0.99098	0.99483	1	18662	0	0.29295	0.0048534	0.0032897	0.106899	581	4	0.29295
CCDC136	4	0.81698	0.82815	1	14832	0	0.33265	0.00488	0.0034063	0.109402	582	3	0.33265
BOLA3	3	0.69144	0.7027	1	12431	0	0.045267	0.0049271	0.0024026	0.094825	583	1	0.045267
LRRC70	4	0.75567	0.75668	1	13665	0	0.11944	0.004939	0.0034068	0.109402	584	2	0.11944
IKBKG	4	0.99506	0.99788	1	18807	0	0.22354	0.0049414	0.0034068	0.109402	585	4	0.22354
BBOX1	4	0.671	0.6626	1	12118	1	0.21295	0.0049609	0.0034068	0.109402	586	2	0.21295
ANGPTL6	4	0.69438	0.68377	1	12476	1	0.2722	0.0049742	0.0034068	0.109402	587	3	0.2722
HIST1H2AJ	4	0.99472	0.99776	1	18795	0	0.40067	0.0049916	0.0034068	0.109402	588	4	0.40067
NUP35	4	0.995	0.99784	1	18805	0	0.25431	0.0049978	0.0034441	0.110414	589	4	0.25431
ELMO2	4	0.99499	0.99784	1	18804	0	0.22144	0.0050088	0.0035037	0.112137	590	4	0.22144
INIP	4	0.39918	0.43763	0.962574	8630	1	0.10105	0.0050312	0.0035669	0.112853	591	2	0.10105
LANCL2	4	0.81543	0.82597	1	14788	0	0.33665	0.0050323	0.0035669	0.112853	592	3	0.33665
RFESD	4	0.99497	0.99784	1	18803	0	0.3065	0.0050337	0.0035669	0.112853	593	4	0.3065
RPL21	4	0.99493	0.99784	1	18802	0	0.2308	0.0050667	0.0035675	0.112853	594	4	0.2308
KCNG1	4	0.99493	0.99784	1	18801	0	0.16775	0.0050677	0.0035675	0.112853	595	4	0.16775
SNRPB2	4	0.96122	0.97389	1	17873	0	0.41402	0.0050812	0.0035675	0.112853	596	3	0.41402
RTN2	4	0.99363	0.99722	1	18753	0	0.26075	0.0050906	0.0035675	0.112853	597	4	0.26075
TMEM132B	4	0.99002	0.99451	1	18627	0	0.26435	0.0051433	0.0036327	0.114122	598	4	0.26435
IFITM1	4	0.97953	0.98707	1	18350	0	0.33417	0.0051481	0.0036327	0.114122	599	3	0.33417
UBA3	3	0.99485	0.99782	1	18799	0	0.30023	0.0051525	0.0024031	0.094825	600	3	0.30023
KIF4B	4	0.036821	0.047778	0.461064	1950	1	0.24971	0.0051569	0.0036327	0.114122	601	3	0.24971
PPARGC1B	4	0.99481	0.9978	1	18798	0	0.1692	0.0051872	0.0036711	0.114122	602	4	0.1692
CACYBP	4	0.99481	0.9978	1	18797	0	0.16599	0.0051913	0.0036711	0.114122	603	4	0.16599
MS4A15	4	0.97524	0.98393	1	18222	0	0.25007	0.0052047	0.0036711	0.114122	604	3	0.25007
NFIC	4	0.8259	0.83895	1	15017	0	0.22482	0.0052297	0.0036716	0.114122	605	3	0.22482
2019-09-05	4	0.90414	0.91725	1	16558	0	0.33771	0.0052565	0.0036716	0.114122	606	3	0.33771
NT5C1B-RDH14	4	0.90585	0.91853	1	16601	0	0.1972	0.0052586	0.0037084	0.114122	607	2	0.1972
MICAL3	4	0.98923	0.99407	1	18599	0	0.4081	0.0052721	0.0037084	0.114122	608	3	0.4081
ISYNA1	4	0.95966	0.97284	1	17840	0	0.29464	0.0052727	0.0037084	0.114122	609	3	0.29464
TCEA2	4	0.99472	0.99776	1	18794	0	0.15529	0.0052829	0.0037084	0.114122	610	4	0.15529
DNAJC18	4	0.92346	0.93811	1	16956	0	0.12839	0.0053012	0.0037089	0.114122	611	3	0.12839
TNFAIP3	4	0.33166	0.40626	0.957614	7996	1	0.11283	0.0053037	0.0037089	0.114122	612	2	0.11283
SBF2	4	0.98686	0.99204	1	18520	0	0.41506	0.0053173	0.0037089	0.114122	613	3	0.41506
HSPB3	4	0.85177	0.86661	1	15498	0	0.27407	0.0053303	0.0037089	0.114122	614	3	0.27407
CBLN1	4	0.99465	0.99772	1	18793	0	0.19382	0.0053511	0.0037545	0.114122	615	4	0.19382
NCOA5	4	0.83359	0.84519	1	15150	0	-0.027031	0.0053538	0.0037545	0.114122	616	1	-0.027031
PARP8	4	0.99463	0.99771	1	18792	0	0.19758	0.0053673	0.003755	0.114122	617	4	0.19758
MOB2	4	0.98892	0.99377	1	18589	0	0.19973	0.0053737	0.003755	0.114122	618	3	0.19973
GINM1	4	0.99462	0.99771	1	18790	0	0.28742	0.0053767	0.003755	0.114122	619	4	0.28742
SUSD2	4	0.50742	0.52454	1	9790	1	0.16455	0.0053955	0.0038509	0.114122	620	3	0.16455
TALDO1	4	0.85844	0.87297	1	15628	0	0.19308	0.0053991	0.0038509	0.114122	621	2	0.19308
GNRH2	4	0.90277	0.91725	1	16521	0	0.34956	0.0054065	0.0038509	0.114122	622	3	0.34956
CMTM1	4	0.47697	0.49662	0.998341	9436	1	0.12063	0.0054065	0.0038509	0.114122	623	2	0.12063
CSDC2	4	0.99459	0.99767	1	18786	0	0.15073	0.0054114	0.0038509	0.114122	624	4	0.15073
TJP3	4	0.99458	0.99767	1	18784	0	0.2577	0.0054241	0.0038509	0.114122	625	4	0.2577
FAM91A1	4	0.83652	0.84824	1	15204	0	0.2595	0.0054311	0.0038514	0.114122	626	3	0.2595
PJA2	4	0.95579	0.96819	1	17746	0	0.33573	0.0054403	0.0038514	0.114122	627	3	0.33573
SUGCT	4	0.99456	0.99767	1	18783	0	0.17091	0.0054421	0.0038514	0.114122	628	4	0.17091
C20orf27	4	0.99398	0.9974	1	18766	0	0.26537	0.0054448	0.0038514	0.114122	629	4	0.26537
RAB3A	4	0.81575	0.82597	1	14801	0	0.18713	0.0054494	0.0038514	0.114122	630	2	0.18713
OR4B1	4	0.99454	0.99767	1	18782	0	0.19229	0.005459	0.0038514	0.114122	631	4	0.19229
GCOM1	4	0.77847	0.78033	1	14076	0	0.22325	0.0054591	0.0038514	0.114122	632	2	0.22325
TCP11L1	4	0.94974	0.96356	1	17597	0	0.35186	0.0054613	0.0038514	0.114122	633	3	0.35186
SLC22A25	4	0.76556	0.76247	1	13842	0	0.1674	0.0054678	0.0038514	0.114122	634	2	0.1674
ABCC10	4	0.99451	0.99763	1	18781	0	0.32505	0.005491	0.0038887	0.114122	635	4	0.32505
C11orf58	3	0.99451	0.99762	1	18780	0	0.29301	0.0054944	0.0026031	0.098107	636	3	0.29301
LTB	4	0.99446	0.99763	1	18779	0	0.20924	0.0055402	0.0038887	0.114122	637	4	0.20924
MAPK8IP1	4	0.99442	0.99763	1	18778	0	0.157	0.0055843	0.0038892	0.114122	638	4	0.157
ZNF98	4	0.74903	0.74632	1	13538	0	0.19854	0.0056063	0.0038892	0.114122	639	2	0.19854
UQCC3	4	0.99439	0.99763	1	18777	0	0.27334	0.0056081	0.0038892	0.114122	640	4	0.27334
PKIG	4	0.98924	0.99407	1	18600	0	0.18285	0.005611	0.0038892	0.114122	641	3	0.18285
CLPTM1L	4	0.99438	0.99763	1	18775	0	0.23576	0.0056168	0.0038892	0.114122	642	4	0.23576
KRTAP24-1	4	0.99434	0.99759	1	18774	0	0.14052	0.0056559	0.0039328	0.114122	643	4	0.14052
THAP7	4	0.99434	0.99759	1	18772	0	0.14552	0.0056592	0.0039328	0.114122	644	4	0.14552
SRMS	4	0.79119	0.79857	1	14320	0	0.20441	0.0056622	0.0039328	0.114122	645	3	0.20441
OR9K2	3	0.82208	0.84089	1	14935	0	0.25155	0.0056728	0.0028285	0.102357	646	2	0.25155
WIPI1	4	0.27888	0.36342	0.934789	7317	1	0.18791	0.0056762	0.0039328	0.114122	647	2	0.18791
ARHGEF1	4	0.95612	0.96819	1	17753	0	0.25836	0.0056769	0.0039328	0.114122	648	3	0.25836
LOC100129697	4	0.63812	0.63451	1	11589	1	0.24116	0.0056976	0.0039333	0.114122	649	3	0.24116
TMEM223	4	0.92781	0.9416	1	17071	0	0.21512	0.0056996	0.0039333	0.114122	650	3	0.21512
ACOT12	4	0.9943	0.99759	1	18771	0	0.19724	0.0056996	0.0039333	0.114122	651	4	0.19724
RASSF10	4	0.96871	0.98001	1	18054	0	0.26194	0.0057278	0.0039773	0.114122	652	3	0.26194
POFUT1	4	0.98992	0.99434	1	18624	0	0.27266	0.0057316	0.0039773	0.114122	653	4	0.27266
NXNL2	4	0.205	0.27119	0.883498	5834	1	0.29002	0.0057324	0.0039773	0.114122	654	3	0.29002
SPAG8	4	0.54022	0.54599	1	10196	1	0.19943	0.0057486	0.0039773	0.114122	655	3	0.19943
DHTKD1	4	0.90747	0.92043	1	16632	0	0.26757	0.0057653	0.0039773	0.114122	656	2	0.26757
OASL	4	0.74894	0.74632	1	13536	0	0.22816	0.0057749	0.0039773	0.114122	657	3	0.22816
BMP1	3	0.298	0.31795	0.913698	7701	1	0.31568	0.0057837	0.0029316	0.103778	658	2	0.31568
C2orf47	4	0.99421	0.99754	1	18770	0	0.22497	0.005789	0.0039779	0.114122	659	4	0.22497
CLCC1	4	0.87149	0.88983	1	15901	0	0.42496	0.0058152	0.0039779	0.114122	660	3	0.42496
ARHGAP20	4	0.99372	0.99722	1	18758	0	0.2116	0.0058325	0.0039779	0.114122	661	4	0.2116
ZDHHC11	4	0.99415	0.99754	1	18769	0	0.21416	0.0058469	0.0039779	0.114122	662	4	0.21416
MRGPRF	4	0.99413	0.9975	1	18767	0	0.16989	0.0058743	0.0040193	0.114466	663	4	0.16989
XKR8	4	0.10161	0.14084	0.713291	3710	1	-0.0090235	0.0058801	0.0040193	0.114466	664	1	-0.0090235
CARD18	4	0.66214	0.64944	1	11981	1	0.25333	0.0058884	0.0040193	0.114466	665	2	0.25333
TUBGCP6	3	0.62999	0.62842	1	11460	0	0.32343	0.0058888	0.0030659	0.10623	666	2	0.32343
TH	4	0.71919	0.71186	1	12966	1	0.20083	0.0059169	0.0040198	0.114466	667	2	0.20083
ERCC6-PGBD3	4	0.9918	0.99546	1	18692	0	0.30637	0.0059422	0.0040198	0.114466	668	4	0.30637
BEST2	4	0.71689	0.7086	1	12920	1	0.25942	0.0059647	0.0040628	0.115191	669	2	0.25942
MT1E	4	0.65563	0.64611	1	11865	1	0.043795	0.0059854	0.0040628	0.115191	670	2	0.043795
F8A3	4	0.99195	0.99562	1	18700	0	0.33093	0.0060122	0.0040634	0.115191	671	4	0.33093
SLC4A11	4	0.94941	0.96319	1	17589	0	0.1772	0.0060308	0.0041198	0.116446	672	3	0.1772
RSPO4	4	0.9695	0.98024	1	18069	0	0.13563	0.006038	0.0041198	0.116446	673	3	0.13563
GTF3C4	4	0.99394	0.99735	1	18765	0	0.27031	0.0060638	0.0041629	0.117315	674	4	0.27031
DCANP1	4	0.79246	0.80227	1	14340	0	0.19126	0.0060847	0.0042152	0.118615	675	3	0.19126
TSPAN18	4	0.9939	0.99731	1	18764	0	0.20991	0.0060989	0.0042561	0.119591	676	4	0.20991
NOC4L	3	0.99389	0.9972	1	18763	0	0.2555	0.0061051	0.0032011	0.10623	677	3	0.2555
CCDC121	4	0.98995	0.99434	1	18625	0	0.2806	0.0061261	0.0042971	0.120564	678	4	0.2806
AMACR	4	0.99387	0.99727	1	18762	0	0.20003	0.0061313	0.0043447	0.120659	679	4	0.20003
SLAMF1	4	0.5351	0.54438	1	10135	1	0.26831	0.0061717	0.0043447	0.120659	680	3	0.26831
ZCCHC3	4	0.99383	0.99727	1	18760	0	0.35818	0.0061719	0.0043447	0.120659	681	4	0.35818
ZNF675	4	0.82684	0.83895	1	15037	0	0.13212	0.0061958	0.0043453	0.120659	682	2	0.13212
UBC	4	0.98801	0.99329	1	18562	0	0.26341	0.0062209	0.0043453	0.120659	683	3	0.26341
TM9SF2	3	0.98512	0.99219	1	18480	0	0.37552	0.0062303	0.0033234	0.10781	684	3	0.37552
CHD2	4	0.89782	0.90982	1	16406	0	0.32764	0.0062354	0.0043919	0.120659	685	3	0.32764
NAALAD2	4	0.99372	0.99722	1	18757	0	0.17496	0.0062832	0.0044499	0.120659	686	4	0.17496
AVIL	4	0.36558	0.42269	0.96036	8301	1	0.30099	0.0062975	0.0044499	0.120659	687	3	0.30099
FOCAD	4	0.95668	0.9694	1	17770	0	0.068935	0.006301	0.0044499	0.120659	688	2	0.068935
VWCE	4	0.96446	0.97594	1	17954	0	0.19778	0.0063116	0.0044499	0.120659	689	3	0.19778
ZNF140	4	0.99368	0.99722	1	18756	0	0.35824	0.0063199	0.0044499	0.120659	690	4	0.35824
NFIX	4	0.98197	0.98875	1	18404	0	0.37065	0.0063238	0.0044499	0.120659	691	2	0.37065
SLC27A1	4	0.99364	0.99722	1	18755	0	0.27153	0.0063626	0.0044504	0.120659	692	4	0.27153
RASSF2	4	0.99363	0.99722	1	18754	0	0.19898	0.0063662	0.0044504	0.120659	693	4	0.19898
OR8H1	4	0.99361	0.99722	1	18752	0	0.16092	0.0063948	0.0044504	0.120659	694	4	0.16092
MARK3	4	0.99359	0.99722	1	18751	0	0.20701	0.0064128	0.0044504	0.120659	695	4	0.20701
KCNN1	4	0.99358	0.99722	1	18750	0	0.29759	0.0064164	0.0044504	0.120659	696	4	0.29759
DEFB108B	4	0.99358	0.99722	1	18748	0	0.25302	0.006423	0.0044504	0.120659	697	4	0.25302
RPUSD4	4	0.99357	0.99722	1	18747	0	0.26512	0.0064296	0.0044504	0.120659	698	4	0.26512
RFXAP	4	0.92697	0.94067	1	17049	0	0.22561	0.0064454	0.0044504	0.120659	699	3	0.22561
NELFE	4	0.50117	0.51793	1	9717	1	0.35414	0.0065021	0.0045453	0.122333	700	3	0.35414
CHRDL2	4	0.95585	0.96819	1	17748	0	0.21471	0.0065071	0.0045453	0.122333	701	3	0.21471
RIMBP3	4	0.99349	0.99711	1	18746	0	0.15826	0.0065079	0.0045453	0.122333	702	4	0.15826
SAT1	4	0.99346	0.99711	1	18745	0	0.27628	0.0065358	0.0045458	0.122333	703	4	0.27628
PTGES2	4	0.39882	0.43763	0.962574	8626	1	0.12741	0.006542	0.0045458	0.122333	704	2	0.12741
GHRH	4	0.99342	0.99707	1	18744	0	0.21321	0.0065785	0.0045898	0.123345	705	4	0.21321
RPL7A	3	0.2762	0.30449	0.904609	7268	1	0.52639	0.0066143	0.0037141	0.114122	706	2	0.52639
CABP4	4	0.99338	0.99695	1	18743	0	0.21095	0.0066237	0.0047044	0.125891	707	4	0.21095
OR5AS1	4	0.99337	0.99695	1	18742	0	0.14567	0.0066311	0.0047044	0.125891	708	4	0.14567
PSENEN	4	0.74877	0.74632	1	13533	0	0.11445	0.0066692	0.0047696	0.127282	709	2	0.11445
ALDH5A1	4	0.90626	0.91853	1	16608	0	0.024483	0.0067218	0.0048344	0.128665	710	1	0.024483
VPS37B	4	0.57596	0.57226	1	10685	1	0.26185	0.0067334	0.0048349	0.128665	711	3	0.26185
MCIDAS	4	0.99326	0.99682	1	18741	0	0.20159	0.0067411	0.0048893	0.129585	712	4	0.20159
CWF19L2	4	0.99324	0.99682	1	18740	0	0.24025	0.0067573	0.0048893	0.129585	713	4	0.24025
C12orf49	4	0.98975	0.99424	1	18618	0	0.25116	0.006774	0.0048899	0.129585	714	4	0.25116
LIPF	4	0.99318	0.99677	1	18738	0	0.1819	0.006821	0.0049344	0.130404	715	4	0.1819
TELO2	4	0.97128	0.98112	1	18121	0	0.37795	0.0068259	0.0049344	0.130404	716	3	0.37795
TGFBR3L	4	0.94205	0.95636	1	17425	0	0.20998	0.0068351	0.0049894	0.131674	717	3	0.20998
SOWAHC	4	0.98854	0.99358	1	18580	0	0.27457	0.0068556	0.0050495	0.132541	718	3	0.27457
TCN1	4	0.80179	0.8096	1	14532	0	0.22509	0.0068607	0.0050495	0.132541	719	2	0.22509
HBZ	4	0.98044	0.98767	1	18370	0	0.082601	0.0068796	0.00505	0.132541	720	2	0.082601
PPP6R3	4	0.99311	0.99672	1	18737	0	0.32084	0.0068865	0.00505	0.132541	721	4	0.32084
ZPR1	4	0.99311	0.99671	1	18736	0	0.31898	0.0068941	0.005121	0.13422	722	4	0.31898
OR6X1	4	0.45098	0.47199	0.97887	9144	1	0.23776	0.0069321	0.0051863	0.135745	723	2	0.23776
TMEM174	4	0.99303	0.99665	1	18735	0	0.14754	0.0069715	0.0052479	0.136984	724	4	0.14754
TPH2	4	0.99303	0.99665	1	18734	0	0.197	0.0069728	0.0052479	0.136984	725	4	0.197
MRGPRG	4	0.65253	0.64611	1	11819	1	0.17314	0.0069891	0.0053065	0.138323	726	2	0.17314
MLXIP	4	0.99297	0.99654	1	18733	0	0.36993	0.0070259	0.0053604	0.138791	727	4	0.36993
ZNF44	4	0.99291	0.99648	1	18732	0	0.25577	0.0070909	0.0054169	0.138791	728	4	0.25577
OR8J1	4	0.98435	0.99025	1	18464	0	0.30161	0.0071352	0.0054174	0.138791	729	3	0.30161
ZNF461	4	0.14193	0.19024	0.786805	4552	1	0.092971	0.0071424	0.0054174	0.138791	730	2	0.092971
SLC2A4RG	4	0.19049	0.25258	0.865428	5545	1	0.18621	0.0071461	0.0054174	0.138791	731	3	0.18621
ITFG2	4	0.99284	0.99648	1	18731	0	0.21013	0.0071609	0.0054174	0.138791	732	4	0.21013
ARAP1	4	0.77248	0.77492	1	13968	0	0.2356	0.0071708	0.0054174	0.138791	733	3	0.2356
HIST1H3F	4	0.99282	0.99648	1	18730	0	0.18069	0.0071778	0.0054174	0.138791	734	4	0.18069
CASP14	4	0.88212	0.89918	1	16091	0	0.16884	0.0071854	0.0054765	0.138791	735	3	0.16884
PC	4	0.99281	0.99641	1	18729	0	0.24503	0.0071896	0.0054765	0.138791	736	4	0.24503
HSF1	4	0.99281	0.99641	1	18728	0	0.22257	0.0071935	0.0054765	0.138791	737	4	0.22257
SLC22A2	4	0.9377	0.95223	1	17315	0	0.14591	0.007195	0.0054765	0.138791	738	3	0.14591
TMEM262	4	0.99278	0.99641	1	18727	0	0.13651	0.0072183	0.0054765	0.138791	739	4	0.13651
ZC3H7A	4	0.040793	0.05516	0.500207	2096	2	0.03546	0.0072284	0.0054765	0.138791	740	2	0.03546
CIRBP	4	0.99277	0.99641	1	18726	0	0.17394	0.0072301	0.0054765	0.138791	741	4	0.17394
F2	4	0.99276	0.99641	1	18725	0	0.24175	0.0072439	0.005477	0.138791	742	4	0.24175
ARHGAP42	4	0.70222	0.69708	1	12631	1	0.28758	0.0072469	0.005477	0.138791	743	3	0.28758
C11orf63	4	0.77068	0.7736	1	13930	0	0.049024	0.0072476	0.005477	0.138791	744	1	0.049024
LMAN2L	4	0.99275	0.99641	1	18724	0	0.17116	0.0072531	0.005477	0.138791	745	4	0.17116
WLS	4	0.97951	0.98707	1	18348	0	0.21595	0.0072535	0.005477	0.138791	746	3	0.21595
TRIM5	4	0.89806	0.90982	1	16414	0	0.32894	0.0072777	0.005477	0.138791	747	3	0.32894
ADPRHL2	4	0.93092	0.94649	1	17141	0	0.26406	0.0072967	0.0055449	0.140325	748	3	0.26406
CBWD5	4	0.99265	0.99629	1	18723	0	0.34312	0.0073461	0.0056687	0.142905	749	4	0.34312
C2CD4C	3	0.93863	0.95676	1	17334	0	0.28252	0.0073461	0.0043582	0.120659	750	2	0.28252
ARSI	3	0.99262	0.99627	1	18722	0	0.23081	0.0073843	0.0043587	0.120659	751	3	0.23081
NKX2-4	3	0.9926	0.99627	1	18721	0	0.2868	0.0074024	0.0043587	0.120659	752	3	0.2868
GGN	4	0.47823	0.49662	0.998341	9451	1	0.072552	0.0074053	0.0056692	0.142905	753	2	0.072552
GUCD1	4	0.99259	0.99629	1	18720	0	0.17689	0.0074113	0.005735	0.144196	754	4	0.17689
TAGLN2	4	0.99258	0.99629	1	18719	0	0.15946	0.0074187	0.0057355	0.144196	755	4	0.15946
APLNR	4	0.92686	0.94067	1	17044	0	0.23855	0.0074529	0.0058687	0.147157	756	2	0.23855
SUCLG2	4	0.74168	0.7403	1	13392	0	-0.029732	0.0074578	0.0058687	0.147157	757	1	-0.029732
IKBKAP	4	0.99187	0.99554	1	18696	0	0.31402	0.0075208	0.0059293	0.148094	758	4	0.31402
VAPB	4	0.99248	0.99616	1	18716	0	0.28515	0.0075241	0.0059293	0.148094	759	4	0.28515
SUV420H1	4	0.57043	0.569	1	10603	1	0.094608	0.0075355	0.0059293	0.148094	760	2	0.094608
CDADC1	4	0.99244	0.99609	1	18715	0	0.19865	0.007562	0.0059941	0.148753	761	4	0.19865
FAM129C	4	0.83368	0.84722	1	15152	0	0.17246	0.0075629	0.0059941	0.148753	762	2	0.17246
MPHOSPH8	4	0.99244	0.99609	1	18714	0	0.11711	0.0075633	0.0059941	0.148753	763	4	0.11711
MTG1	4	0.83866	0.85026	1	15242	0	0.25777	0.0075837	0.0059946	0.148753	764	2	0.25777
CBFA2T2	4	0.65948	0.64779	1	11937	1	0.21261	0.0075945	0.0059946	0.148753	765	2	0.21261
GATA5	4	0.976	0.98505	1	18243	0	0.1979	0.0076155	0.0061786	0.15199	766	3	0.1979
CD5	4	0.99238	0.99597	1	18713	0	0.13464	0.0076177	0.0061786	0.15199	767	4	0.13464
G6PD	4	0.98666	0.9917	1	18515	0	0.21311	0.0076249	0.0061786	0.15199	768	3	0.21311
FLNA	4	0.99237	0.9959	1	18712	0	0.16332	0.0076341	0.0062439	0.15199	769	4	0.16332
FBXW5	4	0.26575	0.34579	0.922211	7057	1	0.28764	0.0076431	0.0062439	0.15199	770	3	0.28764
MCCC2	4	0.99235	0.9959	1	18711	0	0.14035	0.0076518	0.0062439	0.15199	771	4	0.14035
HIP1R	4	0.97316	0.98239	1	18166	0	0.24518	0.0076536	0.0062439	0.15199	772	3	0.24518
XRCC6	4	0.8543	0.86847	1	15536	0	0.31917	0.0076568	0.0062439	0.15199	773	3	0.31917
EGR1	4	0.98544	0.99101	1	18489	0	0.21724	0.0076644	0.0062439	0.15199	774	3	0.21724
SLC39A3	4	0.99108	0.995	1	18665	0	0.21878	0.0076698	0.0062439	0.15199	775	4	0.21878
OR52J3	4	0.99233	0.9959	1	18710	0	0.15833	0.0076723	0.0062439	0.15199	776	4	0.15833
ALS2CR11	4	0.16885	0.22605	0.833978	5108	1	0.22779	0.007675	0.0062439	0.15199	777	3	0.22779
QPCTL	4	0.99229	0.9959	1	18709	0	0.22021	0.007706	0.0062444	0.15199	778	4	0.22021
CHMP7	4	0.15309	0.20586	0.819959	4772	1	0.30151	0.0077076	0.0062444	0.15199	779	3	0.30151
C9	4	0.74711	0.74632	1	13496	0	0.099146	0.0077206	0.0062444	0.15199	780	2	0.099146
XRCC5	3	0.99226	0.99603	1	18708	0	0.40188	0.007744	0.0046795	0.125577	781	3	0.40188
GLIPR1L1	4	0.99225	0.99576	1	18707	0	0.25509	0.0077494	0.0064449	0.156671	782	4	0.25509
MMP13	4	0.85593	0.86936	1	15570	0	0.16418	0.0077731	0.0065154	0.157982	783	3	0.16418
TRMT112	4	0.99222	0.99576	1	18706	0	0.3647	0.0077798	0.0065154	0.157982	784	4	0.3647
COL4A2	4	0.7791	0.78033	1	14092	0	0.2313	0.0078012	0.0065797	0.158948	785	3	0.2313
C1QTNF3	4	0.84128	0.85516	1	15298	0	0.2037	0.0078105	0.0065797	0.158948	786	3	0.2037
TAF7	4	0.018084	0.022894	0.370398	1177	1	-0.1058	0.0078257	0.0065802	0.158948	787	1	-0.1058
RNF34	4	0.93095	0.94649	1	17143	0	0.31134	0.0078487	0.0066496	0.159854	788	3	0.31134
TMEM217	4	0.88835	0.90281	1	16232	0	0.35151	0.0078614	0.0066496	0.159854	789	3	0.35151
MORN1	4	0.72954	0.72483	1	13163	0	0.18759	0.0079143	0.0066501	0.159854	790	2	0.18759
ANAPC15	4	0.72126	0.71351	1	13005	0	0.42311	0.0079198	0.0067185	0.160476	791	3	0.42311
PSMF1	4	0.99207	0.99569	1	18703	0	0.30272	0.0079304	0.0067185	0.160476	792	4	0.30272
C11orf73	4	0.721	0.71351	1	12999	0	0.20909	0.0079307	0.0067185	0.160476	793	2	0.20909
KIF6	4	0.99207	0.99569	1	18702	0	0.31953	0.0079325	0.0067185	0.160476	794	4	0.31953
GNG3	4	0.74965	0.74777	1	13548	0	0.30464	0.0079856	0.0067191	0.160476	795	3	0.30464
IGHMBP2	4	0.95055	0.96455	1	17613	0	0.33771	0.0080083	0.0068906	0.164368	796	3	0.33771
WWC1	4	0.99197	0.99562	1	18701	0	0.15927	0.0080334	0.0069595	0.165187	797	4	0.15927
SLC30A1	4	0.46305	0.48506	0.99071	9280	1	0.31466	0.0080365	0.0069595	0.165187	798	3	0.31466
DUSP1	4	0.99194	0.99554	1	18699	0	0.13043	0.0080576	0.007031	0.165457	799	4	0.13043
CPNE1	4	0.99193	0.99554	1	18698	0	0.14722	0.0080661	0.007031	0.165457	800	4	0.14722
EBI3	4	0.98813	0.99349	1	18567	0	0.31101	0.0081261	0.0070315	0.165457	801	3	0.31101
MRAP	4	0.90935	0.92292	1	16674	0	0.26235	0.0081291	0.0070315	0.165457	802	3	0.26235
MRPL40	4	0.53175	0.54111	1	10088	1	0.25935	0.0081332	0.0070315	0.165457	803	3	0.25935
OR51A2	4	0.47384	0.49165	0.995024	9403	1	0.21743	0.0081427	0.0070315	0.165457	804	3	0.21743
C9orf131	4	0.99186	0.99554	1	18694	0	0.16193	0.0081432	0.0070315	0.165457	805	4	0.16193
CLEC3A	4	0.87039	0.88905	1	15877	0	0.24072	0.0081791	0.0071072	0.16643	806	2	0.24072
LMNTD2	4	0.9918	0.99546	1	18693	0	0.1813	0.0081992	0.0071072	0.16643	807	4	0.1813
SSBP4	4	0.75704	0.75668	1	13689	0	0.2415	0.008214	0.0071072	0.16643	808	3	0.2415
LARP4B	4	0.99175	0.99546	1	18691	0	0.26493	0.0082468	0.0071077	0.16643	809	4	0.26493
RAB1B	4	0.28311	0.36917	0.934789	7395	1	0.18069	0.0082618	0.0071735	0.166757	810	3	0.18069
OR52N2	4	0.99172	0.99539	1	18690	0	0.19062	0.0082816	0.007174	0.166757	811	4	0.19062
HOMER1	4	0.48308	0.50317	0.998341	9501	1	0.36733	0.0082929	0.007174	0.166757	812	3	0.36733
HOXA1	4	0.97656	0.98506	1	18262	0	0.29184	0.0083354	0.007245	0.16801	813	3	0.29184
TIGD6	4	0.99163	0.99532	1	18689	0	0.35182	0.0083705	0.0072455	0.16801	814	4	0.35182
SPATA25	4	0.87191	0.88983	1	15909	0	0.12911	0.0083747	0.0073248	0.169438	815	2	0.12911
ZNF268	4	0.99029	0.99451	1	18636	0	0.22876	0.0083796	0.0073248	0.169438	816	4	0.22876
DGAT2	4	0.98221	0.98889	1	18410	0	0.18899	0.0084035	0.0074077	0.170984	817	2	0.18899
SSC5D	4	0.99159	0.99532	1	18688	0	0.2154	0.0084144	0.0074896	0.170984	818	4	0.2154
SPRR2G	4	0.68944	0.68053	1	12404	1	0.18422	0.0084198	0.0074896	0.170984	819	2	0.18422
RTN3	4	0.93307	0.94784	1	17194	0	0.16281	0.0084367	0.0074896	0.170984	820	2	0.16281
C1orf54	4	0.99154	0.99532	1	18687	0	0.18926	0.0084586	0.0074896	0.170984	821	4	0.18926
CDH9	4	0.99154	0.99532	1	18686	0	0.19892	0.0084615	0.0074901	0.170984	822	4	0.19892
NASP	4	0.99154	0.99532	1	18685	0	0.10989	0.0084645	0.0074901	0.170984	823	4	0.10989
SDS	4	0.9881	0.99349	1	18566	0	0.29579	0.0084762	0.0074901	0.170984	824	3	0.29579
PIGT	4	0.99152	0.99532	1	18684	0	0.15295	0.0084777	0.0074901	0.170984	825	4	0.15295
CUL5	4	0.8216	0.83364	1	14925	0	0.31543	0.0084988	0.0074901	0.170984	826	3	0.31543
PTTG1IP	4	0.99149	0.99532	1	18683	0	0.1729	0.0085073	0.0074901	0.170984	827	4	0.1729
CYP2R1	4	0.99146	0.99516	1	18681	0	0.23308	0.0085414	0.0076388	0.173562	828	4	0.23308
PPP6C	3	0.446	0.43905	0.964854	9091	1	0.59039	0.0085539	0.0056671	0.142905	829	2	0.59039
SLC1A3	4	0.99002	0.99451	1	18629	0	0.24608	0.0085644	0.0076388	0.173562	830	4	0.24608
CRHR2	4	0.91901	0.93384	1	16867	0	0.31909	0.0086085	0.0076394	0.173562	831	3	0.31909
GCDH	4	0.18563	0.24517	0.857644	5446	2	0.10304	0.0086523	0.0077876	0.175273	832	2	0.10304
SCGB3A1	4	0.99131	0.99516	1	18678	0	0.16954	0.0086871	0.0077876	0.175273	833	4	0.16954
LOC100129520	4	0.9913	0.99516	1	18677	0	0.16521	0.0086999	0.0077876	0.175273	834	4	0.16521
DNAI2	4	0.9913	0.99516	1	18676	0	0.40656	0.0087044	0.0077876	0.175273	835	4	0.40656
CCDC38	4	0.86546	0.88659	1	15770	0	0.10839	0.0087186	0.0077876	0.175273	836	2	0.10839
ZFYVE16	4	0.99124	0.99516	1	18675	0	0.26483	0.0087603	0.0077881	0.175273	837	4	0.26483
ZNF134	4	0.10842	0.14548	0.719389	3846	2	-0.060868	0.0087711	0.0077881	0.175273	838	1	-0.060868
MAMLD1	4	0.99121	0.99516	1	18673	0	0.13536	0.0087876	0.0077881	0.175273	839	4	0.13536
MST1R	4	0.99118	0.99508	1	18671	0	0.23215	0.0088225	0.0078575	0.176018	840	4	0.23215
MPHOSPH9	4	0.99115	0.99508	1	18669	0	0.34157	0.0088515	0.007858	0.176018	841	4	0.34157
DBF4	4	0.99113	0.99508	1	18668	0	0.31147	0.0088683	0.007858	0.176018	842	4	0.31147
SNRNP70	4	0.99112	0.99508	1	18667	0	0.33116	0.0088774	0.007858	0.176018	843	4	0.33116
IGSF22	4	0.96028	0.97311	1	17856	0	0.24026	0.0088991	0.0079399	0.177229	844	3	0.24026
ABHD17A	4	0.98591	0.99113	1	18500	0	0.2955	0.0088995	0.0079399	0.177229	845	3	0.2955
NSFL1C	4	0.85163	0.86661	1	15494	0	0.26017	0.0089016	0.0079399	0.177229	846	3	0.26017
ADNP	4	0.48073	0.49991	0.998341	9472	1	0.17677	0.0089191	0.0080327	0.178685	847	3	0.17677
LGR5	4	0.99107	0.995	1	18664	0	0.22931	0.008928	0.0080327	0.178685	848	4	0.22931
KRTAP10-11	4	0.16954	0.22605	0.833978	5128	2	0.062166	0.0089458	0.0080332	0.178685	849	2	0.062166
ASCC2	4	0.99101	0.99492	1	18663	0	0.14459	0.0089895	0.0081073	0.179289	850	4	0.14459
STK39	4	0.92754	0.94114	1	17063	0	0.28355	0.0089922	0.0081073	0.179289	851	3	0.28355
MIER3	4	0.98505	0.99063	1	18477	0	0.22298	0.0089981	0.0081073	0.179289	852	3	0.22298
WDR41	4	0.95283	0.96656	1	17662	0	0.31574	0.0090336	0.0081938	0.179965	853	3	0.31574
CD70	4	0.97496	0.98375	1	18215	0	0.19212	0.0090403	0.0081938	0.179965	854	3	0.19212
JAM2	4	0.99095	0.99483	1	18661	0	0.15189	0.0090545	0.0081938	0.179965	855	4	0.15189
GTF3C3	4	0.99094	0.99483	1	18660	0	0.22318	0.0090607	0.0081943	0.179965	856	4	0.22318
RPL38	4	0.95967	0.97284	1	17841	0	0.29336	0.0090861	0.0081943	0.179965	857	3	0.29336
FUBP1	4	0.97449	0.98357	1	18199	0	0.2151	0.0091369	0.008269	0.181395	858	3	0.2151
EPS8L2	4	0.99083	0.99475	1	18659	0	0.14534	0.0091683	0.0083462	0.182055	859	4	0.14534
FADS3	4	0.99083	0.99475	1	18658	0	0.19494	0.0091746	0.0083462	0.182055	860	4	0.19494
KRI1	4	0.98689	0.99204	1	18524	0	0.25154	0.0091753	0.0083462	0.182055	861	3	0.25154
CH17-360D5.1	4	0.99043	0.99457	1	18641	0	0.29496	0.0091778	0.0083462	0.182055	862	4	0.29496
FLRT3	4	0.79408	0.80227	1	14373	0	0.3221	0.0091968	0.0083467	0.182055	863	3	0.3221
SLC36A2	4	0.28122	0.36742	0.934789	7362	1	0.20752	0.0092321	0.0084374	0.182792	864	3	0.20752
PTBP1	4	0.82261	0.83575	1	14951	0	0.019556	0.0092436	0.0084374	0.182792	865	1	0.019556
TTC9C	4	0.74179	0.7403	1	13393	0	0.22136	0.0092471	0.0084374	0.182792	866	3	0.22136
SSX7	4	0.99072	0.99475	1	18656	0	0.3196	0.0092808	0.0084379	0.182792	867	4	0.3196
ENTPD6	4	0.99071	0.99475	1	18655	0	0.28595	0.0092855	0.0084379	0.182792	868	4	0.28595
LCE2A	4	0.99071	0.99466	1	18654	0	0.30061	0.0092942	0.0085208	0.184182	869	4	0.30061
ULK1	4	0.99068	0.99466	1	18653	0	0.2045	0.0093164	0.0085213	0.184182	870	4	0.2045
PDE4A	4	0.99062	0.99466	1	18652	0	0.22091	0.0093831	0.0086151	0.185162	871	4	0.22091
NEB	4	0.9906	0.99466	1	18651	0	0.21064	0.0093991	0.0086151	0.185162	872	4	0.21064
OCSTAMP	4	0.96565	0.97673	1	17984	0	0.16705	0.0094036	0.0086151	0.185162	873	3	0.16705
AVP	4	0.99058	0.99466	1	18650	0	0.30261	0.0094206	0.0086151	0.185162	874	4	0.30261
ARFGEF2	3	0.66535	0.66775	1	12035	0	0.25065	0.0094244	0.0066512	0.159854	875	2	0.25065
TSPY4	4	0.99057	0.99466	1	18649	0	0.1366	0.0094278	0.0086151	0.185162	876	4	0.1366
MAST1	4	0.99057	0.99466	1	18648	0	0.10895	0.009431	0.0087006	0.185757	877	4	0.10895
SRPK1	4	0.99055	0.99466	1	18647	0	0.15601	0.0094486	0.0087006	0.185757	878	4	0.15601
FRG1	4	0.86548	0.88659	1	15771	0	0.23453	0.0094535	0.0087006	0.185757	879	2	0.23453
ILF3	4	0.99054	0.99466	1	18646	0	0.19947	0.0094583	0.0087011	0.185757	880	4	0.19947
KIAA0907	4	0.99054	0.99466	1	18645	0	0.18386	0.0094647	0.0087011	0.185757	881	4	0.18386
SUN5	4	0.82237	0.83575	1	14942	0	0.26286	0.009469	0.0087011	0.185757	882	3	0.26286
PPP2R5D	4	0.99051	0.99457	1	18644	0	0.255	0.0094928	0.008783	0.185862	883	4	0.255
PORCN	4	0.99049	0.99457	1	18643	0	0.17423	0.0095064	0.008783	0.185862	884	4	0.17423
LSM14A	4	0.98921	0.99407	1	18598	0	0.22832	0.0095092	0.008783	0.185862	885	3	0.22832
HDAC8	4	0.99048	0.99457	1	18642	0	0.18798	0.0095177	0.0087835	0.185862	886	4	0.18798
MAB21L2	4	0.25389	0.33059	0.913698	6810	1	0.19432	0.0095885	0.0088763	0.185862	887	2	0.19432
C12orf74	4	0.9269	0.94067	1	17047	0	0.1571	0.0096011	0.0088768	0.185862	888	3	0.1571
MAP3K11	4	0.74637	0.74332	1	13479	0	0.015884	0.0096109	0.0088768	0.185862	889	1	0.015884
CD6	4	0.99037	0.99457	1	18639	0	0.18299	0.0096277	0.0088768	0.185862	890	4	0.18299
ZNHIT6	4	0.99036	0.99457	1	18638	0	0.2331	0.0096439	0.0088768	0.185862	891	4	0.2331
FGB	4	0.15225	0.20394	0.815219	4763	1	0.20173	0.0096545	0.008939	0.185862	892	2	0.20173
CS	4	0.27584	0.35606	0.925243	7259	1	0.035435	0.0096634	0.008939	0.185862	893	1	0.035435
ABCA2	4	0.99034	0.99451	1	18637	0	0.16766	0.0096635	0.008939	0.185862	894	4	0.16766
PIK3R1	4	0.94488	0.96028	1	17481	0	0.26089	0.0097201	0.008939	0.185862	895	3	0.26089
KIAA0368	4	0.34933	0.41608	0.958075	8156	1	0.3036	0.0097268	0.008939	0.185862	896	3	0.3036
MMAB	4	0.99027	0.99451	1	18635	0	0.10013	0.0097288	0.008939	0.185862	897	4	0.10013
CCDC82	4	0.99025	0.99451	1	18634	0	0.33946	0.0097468	0.008939	0.185862	898	4	0.33946
AVL9	3	0.99025	0.99452	1	18633	0	0.36635	0.0097546	0.0069289	0.164871	899	3	0.36635
SYT7	4	0.51049	0.52617	1	9828	1	0.36907	0.0097569	0.008939	0.185862	900	3	0.36907
NAPB	4	0.97964	0.98721	1	18352	0	0.28257	0.0097639	0.008939	0.185862	901	3	0.28257
USP9X	4	0.99023	0.99451	1	18632	0	0.21445	0.0097706	0.008939	0.185862	902	4	0.21445
OXT	4	0.016101	0.020908	0.361444	1087	1	0.17158	0.0098053	0.0089395	0.185862	903	2	0.17158
UBL3	4	0.99016	0.99451	1	18631	0	0.19627	0.0098357	0.0089395	0.185862	904	4	0.19627
ZNF605	4	0.81597	0.82705	1	14807	0	0.1886	0.0098478	0.0089395	0.185862	905	2	0.1886
TTC12	4	0.62617	0.61976	1	11408	1	0.11227	0.0098732	0.0089395	0.185862	906	2	0.11227
SEC61A2	4	0.9901	0.99451	1	18630	0	0.20726	0.0099019	0.0090312	0.186966	907	4	0.20726
HMGB3	4	0.9889	0.99377	1	18588	0	0.15803	0.0099043	0.0090312	0.186966	908	3	0.15803
PKN1	4	0.67447	0.6626	1	12184	1	0.21345	0.009907	0.0090312	0.186966	909	3	0.21345
NOL12	4	0.070091	0.10135	0.623869	3053	1	0.28291	0.0099258	0.0090317	0.186966	910	3	0.28291
SMTNL1	4	0.85384	0.86756	1	15528	0	0.25274	0.0099573	0.0091209	0.1874	911	2	0.25274
PGAP2	4	0.26394	0.34448	0.922211	7029	1	0.14908	0.0099634	0.0091209	0.1874	912	2	0.14908
DENR	4	0.4681	0.4867	0.992822	9337	1	0.076582	0.0099782	0.0091209	0.1874	913	2	0.076582
TM7SF2	4	0.99002	0.99451	1	18628	0	0.21114	0.0099817	0.0091214	0.1874	914	4	0.21114
PPIP5K2	4	0.97916	0.98676	1	18337	0	0.37362	0.0099933	0.0091214	0.1874	915	3	0.37362
TICAM1	4	0.97796	0.98607	1	18302	0	0.19851	0.0099939	0.0091214	0.1874	916	3	0.19851
ANKRD60	4	0.99001	0.99451	1	18626	0	0.12052	0.0099943	0.0091214	0.1874	917	4	0.12052
ATM	4	0.9611	0.97389	1	17869	0	0.25039	0.010024	0.0092048	0.188506	918	3	0.25039
PKNOX2	4	0.44726	0.47199	0.97887	9112	1	0.27592	0.010031	0.0092048	0.188506	919	3	0.27592
MKRN1	4	0.92637	0.94017	1	17027	0	0.20098	0.010047	0.0092779	0.189287	920	3	0.20098
LSM14B	4	0.98991	0.99434	1	18623	0	0.19153	0.010087	0.0093613	0.189287	921	4	0.19153
NBPF20	2	0.75075	0.78165	1	13569	0	0.23117	0.010109	0.004452	0.120659	922	1	0.23117
OR10A6	4	0.96588	0.97673	1	17991	0	0.16522	0.010123	0.0093613	0.189287	923	2	0.16522
ACSM3	4	0.57744	0.57226	1	10706	1	0.21508	0.010123	0.0093613	0.189287	924	3	0.21508
LIG1	4	0.98986	0.99434	1	18622	0	0.27197	0.010138	0.0093613	0.189287	925	4	0.27197
PXT1	4	0.95776	0.97028	1	17799	0	0.29801	0.010147	0.0093613	0.189287	926	3	0.29801
TMEM222	4	0.78351	0.7857	1	14178	0	0.11432	0.010188	0.0093618	0.189287	927	1	0.11432
BPI	4	0.98412	0.98987	1	18458	0	0.28932	0.010197	0.0093618	0.189287	928	3	0.28932
VNN1	4	0.98979	0.99434	1	18621	0	0.28097	0.010207	0.0093618	0.189287	929	4	0.28097
FAM173B	4	0.98979	0.99434	1	18620	0	0.28032	0.010209	0.0093618	0.189287	930	4	0.28032
RSF1	3	0.88223	0.90568	1	16093	0	0.054327	0.010212	0.0071549	0.166757	931	1	0.054327
SEMA6A	4	0.98977	0.99434	1	18619	0	0.1927	0.010226	0.0093618	0.189287	932	4	0.1927
SIGMAR1	4	0.68456	0.6708	1	12326	1	0.1782	0.010236	0.0094515	0.190505	933	3	0.1782
EEF1D	4	0.80766	0.81681	1	14650	0	0.20923	0.010238	0.0094515	0.190505	934	3	0.20923
RGMB	4	0.70209	0.69708	1	12623	1	0.31524	0.010247	0.009452	0.190505	935	3	0.31524
GALT	4	0.34291	0.41443	0.958075	8102	1	0.36691	0.010271	0.0095271	0.191424	936	3	0.36691
GMPS	3	0.79993	0.82378	1	14496	0	0.5452	0.010291	0.0071554	0.166757	937	2	0.5452
TNNI2	4	0.80202	0.8096	1	14537	0	0.28817	0.010308	0.0095276	0.191424	938	2	0.28817
ZNF396	4	0.85585	0.86936	1	15568	0	0.21624	0.010321	0.0095276	0.191424	939	3	0.21624
TPD52L2	4	0.57596	0.57226	1	10686	1	0.067198	0.010345	0.0096245	0.192774	940	1	0.067198
SYNGR1	4	0.94708	0.96211	1	17532	0	0.18594	0.01036	0.0096251	0.192774	941	3	0.18594
SUGP2	4	0.75045	0.74777	1	13562	0	0.27503	0.01039	0.0097235	0.192936	942	3	0.27503
LPL	4	0.3191	0.3997	0.955721	7896	1	0.021037	0.010398	0.0097235	0.192936	943	1	0.021037
ZNF709	4	0.86414	0.88327	1	15747	0	0.20979	0.01042	0.0097235	0.192936	944	3	0.20979
MCM4	3	0.98954	0.99442	1	18612	0	0.27294	0.010457	0.0071554	0.166757	945	3	0.27294
FBXO3	4	0.89617	0.90777	1	16373	0	0.26137	0.010462	0.0097235	0.192936	946	3	0.26137
TSSK2	4	0.37387	0.42763	0.96036	8377	1	0.2846	0.010465	0.0097235	0.192936	947	3	0.2846
MTRNR2L1	2	0.81086	0.84546	1	14712	0	0.26775	0.01053	0.0047318	0.126449	948	1	0.26775
PI16	4	0.98835	0.99349	1	18573	0	0.33086	0.010579	0.009724	0.192936	949	3	0.33086
FGF10	4	0.77126	0.7736	1	13942	0	0.28579	0.010593	0.009724	0.192936	950	3	0.28579
NKX2-2	4	0.97952	0.98707	1	18349	0	0.23926	0.010639	0.009724	0.192936	951	3	0.23926
CDH3	4	0.19943	0.26478	0.877032	5729	1	0.23876	0.010651	0.009724	0.192936	952	3	0.23876
MAZ	4	0.44939	0.47199	0.97887	9131	1	0.23486	0.010737	0.0098189	0.194413	953	3	0.23486
RPUSD1	4	0.92507	0.93915	1	16999	0	0.17634	0.01074	0.0098189	0.194413	954	2	0.17634
IL7R	4	0.49506	0.50818	1	9644	1	0.11671	0.010759	0.009924	0.195695	955	2	0.11671
RBM48	4	0.6992	0.69043	1	12562	1	0.14124	0.010828	0.0099246	0.195695	956	2	0.14124
DAB2	4	0.97272	0.98177	1	18156	0	0.23306	0.010876	0.010142	0.196085	957	3	0.23306
E2F8	4	0.87741	0.89455	1	16006	0	0.27694	0.010916	0.010245	0.196085	958	3	0.27694
FOXR2	4	0.069823	0.10135	0.623869	3047	2	-0.1332	0.010922	0.010245	0.196085	959	1	-0.1332
SLC12A5	4	0.41927	0.44915	0.965782	8826	1	0.14463	0.010948	0.010358	0.196085	960	3	0.14463
HNRNPM	4	0.9029	0.91725	1	16525	0	0.26313	0.010971	0.010358	0.196085	961	3	0.26313
DMRTA1	4	0.96728	0.9791	1	18022	0	0.22565	0.010975	0.010358	0.196085	962	3	0.22565
FBXL7	4	0.86629	0.88659	1	15787	0	0.18111	0.010981	0.010477	0.196085	963	2	0.18111
AIMP2	4	0.66103	0.64779	1	11964	1	-0.031259	0.011027	0.010576	0.196085	964	1	-0.031259
PBX1	4	0.90484	0.91787	1	16574	0	0.22943	0.011061	0.010576	0.196085	965	3	0.22943
SLC35A4	4	0.98409	0.98987	1	18456	0	0.22027	0.011129	0.010576	0.196085	966	3	0.22027
GLIPR1	4	0.94998	0.96389	1	17600	0	0.24308	0.011135	0.010576	0.196085	967	3	0.24308
SMPX	3	0.58033	0.57175	1	10749	1	0.38232	0.011144	0.0076316	0.173562	968	2	0.38232
ZNF622	4	0.62001	0.61492	1	11303	1	0.15572	0.011149	0.010576	0.196085	969	3	0.15572
BPIFB4	4	0.95849	0.97117	1	17816	0	0.18937	0.011167	0.010576	0.196085	970	3	0.18937
MRPL38	4	0.8952	0.90709	1	16356	0	0.28894	0.011186	0.010576	0.196085	971	2	0.28894
OR51B6	4	0.7745	0.77633	1	14001	0	0.15365	0.011199	0.010576	0.196085	972	2	0.15365
ABCB8	4	0.54974	0.55424	1	10326	1	0.045026	0.011237	0.010576	0.196085	973	1	0.045026
ZBTB3	4	0.86681	0.88659	1	15804	0	0.18503	0.011266	0.010576	0.196085	974	3	0.18503
DNASE2	4	0.46059	0.48337	0.99071	9252	1	0.16565	0.011277	0.010576	0.196085	975	2	0.16565
YWHAH	4	0.29859	0.38528	0.943071	7714	2	-0.12165	0.011289	0.010576	0.196085	976	1	-0.12165
SCGB1D4	4	0.91164	0.92589	1	16719	0	0.25404	0.011328	0.010576	0.196085	977	3	0.25404
INS	4	0.98752	0.99291	1	18546	0	0.18605	0.011339	0.010576	0.196085	978	3	0.18605
TLE2	4	0.93444	0.94913	1	17231	0	0.24663	0.011471	0.010576	0.196085	979	2	0.24663
NLRP6	4	0.72868	0.72321	1	13154	0	0.10612	0.011499	0.010576	0.196085	980	2	0.10612
C17orf99	3	0.98849	0.9939	1	18578	0	0.1071	0.01151	0.0080746	0.179201	981	3	0.1071
CRYAB	4	0.58791	0.58041	1	10866	1	0.24746	0.011524	0.010576	0.196085	982	2	0.24746
ARAF	4	0.26112	0.33933	0.913698	6972	1	0.30557	0.011548	0.010576	0.196085	983	3	0.30557
GDF6	4	0.51142	0.52777	1	9839	1	0.22331	0.01155	0.010576	0.196085	984	2	0.22331
EDN3	4	0.56886	0.569	1	10579	1	0.18994	0.011563	0.010576	0.196085	985	3	0.18994
CCDC127	4	0.96778	0.97978	1	18035	0	0.26842	0.011563	0.010576	0.196085	986	2	0.26842
IL9	4	0.73317	0.73258	1	13226	0	0.345	0.011604	0.010576	0.196085	987	3	0.345
IER3	4	0.57798	0.57226	1	10716	1	0.12201	0.011615	0.010576	0.196085	988	2	0.12201
OGT	3	0.97017	0.9806	1	18090	0	0.4353	0.011617	0.0080752	0.179201	989	3	0.4353
TREML2	4	0.94917	0.96319	1	17581	0	0.2195	0.011619	0.010576	0.196085	990	3	0.2195
NARS2	4	0.97134	0.98112	1	18124	0	0.31449	0.011634	0.010576	0.196085	991	3	0.31449
KIF20A	4	0.97026	0.98045	1	18095	0	0.23478	0.01164	0.010576	0.196085	992	3	0.23478
OR5M3	4	0.98443	0.99025	1	18466	0	0.25282	0.011681	0.010576	0.196085	993	3	0.25282
RILPL1	4	0.96233	0.97465	1	17904	0	0.29808	0.011689	0.010576	0.196085	994	3	0.29808
RPL7	3	0.76613	0.78343	1	13857	0	0.55215	0.011706	0.008169	0.179965	995	2	0.55215
CCDC101	4	0.74065	0.7403	1	13372	0	0.35667	0.011708	0.010576	0.196085	996	3	0.35667
AGO2	4	0.71835	0.71022	1	12950	1	0.24794	0.011734	0.010576	0.196085	997	3	0.24794
PHYKPL	4	0.97625	0.98505	1	18253	0	0.18529	0.01174	0.010576	0.196085	998	3	0.18529
NRIP1	4	0.88774	0.90281	1	16216	0	0.12495	0.011761	0.010576	0.196085	999	2	0.12495
TCERG1L	4	0.12542	0.17307	0.779021	4216	2	0.0013957	0.011865	0.010576	0.196085	1000	1	0.0013957
HCRTR2	4	0.71453	0.70531	1	12877	1	0.19998	0.011872	0.010685	0.196085	1001	2	0.19998
UBOX5	4	0.97864	0.98625	1	18323	0	0.20492	0.011876	0.010685	0.196085	1002	3	0.20492
SPANXN2	4	0.21874	0.29212	0.904609	6106	2	0.12825	0.011892	0.010685	0.196085	1003	2	0.12825
TTC16	4	0.98319	0.98959	1	18433	0	0.23212	0.011912	0.010685	0.196085	1004	3	0.23212
GEMIN4	4	0.9221	0.93655	1	16934	0	0.087797	0.011918	0.010685	0.196085	1005	2	0.087797
C19orf84	4	0.031345	0.039657	0.432246	1723	2	0.013029	0.011919	0.010685	0.196085	1006	2	0.013029
ELP3	3	0.85328	0.87423	1	15519	0	0.10766	0.011943	0.0084327	0.182792	1007	1	0.10766
HSPA12B	4	0.93571	0.94955	1	17264	0	0.26224	0.011945	0.010685	0.196085	1008	2	0.26224
DCHS1	4	0.85433	0.86847	1	15537	0	0.17556	0.012005	0.010808	0.196085	1009	2	0.17556
TNFSF13B	4	0.88676	0.90281	1	16195	0	0.21085	0.012052	0.010808	0.196085	1010	3	0.21085
DYRK3	4	0.73508	0.73415	1	13268	0	0.31536	0.012072	0.010808	0.196085	1011	2	0.31536
MAML2	4	0.50714	0.52454	1	9783	1	0.21864	0.012078	0.010809	0.196085	1012	3	0.21864
SNTA1	4	0.95027	0.96422	1	17606	0	0.11934	0.012092	0.010809	0.196085	1013	2	0.11934
NYNRIN	4	0.041028	0.055627	0.501589	2104	1	0.12646	0.012125	0.010809	0.196085	1014	2	0.12646
LMO2	4	0.96917	0.98024	1	18064	0	0.20097	0.012131	0.010809	0.196085	1015	3	0.20097
MS4A4A	4	0.50433	0.52126	1	9752	1	0.30145	0.012172	0.010933	0.196085	1016	3	0.30145
CT47A6	3	0.9258	0.94725	1	17009	0	0.42083	0.012199	0.0088664	0.185862	1017	2	0.42083
SMIM15	4	0.70147	0.69708	1	12609	1	0.16901	0.012232	0.010933	0.196085	1018	2	0.16901
MAGEA10	4	0.76437	0.76247	1	13816	0	0.18661	0.012259	0.010933	0.196085	1019	3	0.18661
RARRES3	4	0.74668	0.7448	1	13484	0	0.18114	0.012273	0.010933	0.196085	1020	3	0.18114
SWAP70	4	0.95216	0.96489	1	17643	0	0.29019	0.012273	0.010933	0.196085	1021	3	0.29019
OR5L2	4	0.95623	0.96879	1	17755	0	0.099608	0.012284	0.010933	0.196085	1022	2	0.099608
FABP6	4	0.46525	0.48506	0.99071	9305	1	-0.00060729	0.012337	0.010933	0.196085	1023	2	-0.00060729
GNL3	4	0.098913	0.13793	0.713291	3649	2	0.045646	0.012354	0.010933	0.196085	1024	2	0.045646
LYNX1	4	0.52803	0.53947	1	10035	1	0.14243	0.012359	0.010933	0.196085	1025	3	0.14243
VMAC	4	0.84785	0.86661	1	15427	0	0.25632	0.012387	0.010933	0.196085	1026	3	0.25632
ZNF143	4	0.65818	0.64779	1	11914	1	0.24766	0.012394	0.010933	0.196085	1027	2	0.24766
TENM2	4	0.97561	0.98432	1	18235	0	0.16407	0.012401	0.010933	0.196085	1028	2	0.16407
SNAPC2	4	0.86763	0.88742	1	15818	0	0.21126	0.012408	0.010933	0.196085	1029	3	0.21126
GLT1D1	4	0.92853	0.94213	1	17084	0	0.18894	0.012412	0.010933	0.196085	1030	3	0.18894
GGACT	4	0.059738	0.088329	0.604339	2762	1	0.29365	0.012416	0.010933	0.196085	1031	3	0.29365
FAM13B	4	0.98092	0.98814	1	18379	0	0.25343	0.012427	0.010933	0.196085	1032	3	0.25343
BLOC1S3	4	0.46268	0.48506	0.99071	9278	1	-0.043077	0.012441	0.010933	0.196085	1033	1	-0.043077
TNNC2	4	0.61231	0.60679	1	11203	1	0.18165	0.012455	0.010933	0.196085	1034	2	0.18165
ALX4	4	0.7853	0.78958	1	14204	0	0.29868	0.012463	0.010933	0.196085	1035	3	0.29868
ZMYND19	4	0.97693	0.98575	1	18270	0	0.18911	0.012483	0.010933	0.196085	1036	3	0.18911
SCRN3	4	0.46232	0.48506	0.99071	9274	1	0.12799	0.012509	0.010933	0.196085	1037	2	0.12799
YIF1A	4	0.86833	0.88821	1	15836	0	0.33097	0.01255	0.010933	0.196085	1038	3	0.33097
NWD1	4	0.39	0.43267	0.96036	8538	1	0.2556	0.012552	0.010933	0.196085	1039	3	0.2556
OR52R1	4	0.58848	0.58041	1	10874	1	0.15416	0.012561	0.010933	0.196085	1040	3	0.15416
ANKRD18B	4	0.82756	0.83994	1	15047	0	0.28839	0.01258	0.010933	0.196085	1041	3	0.28839
BCOR	4	0.75574	0.75668	1	13669	0	-0.078859	0.012598	0.010933	0.196085	1042	1	-0.078859
PCSK1	4	0.98518	0.99076	1	18483	0	0.1709	0.012605	0.010933	0.196085	1043	3	0.1709
DNAJC21	4	0.96303	0.97518	1	17918	0	0.22049	0.012611	0.010933	0.196085	1044	3	0.22049
PLD4	4	0.23417	0.3076	0.904609	6414	2	0.1257	0.012625	0.010933	0.196085	1045	2	0.1257
MEF2B	4	0.85777	0.87205	1	15607	0	0.21944	0.012649	0.010933	0.196085	1046	3	0.21944
WFDC8	4	0.869	0.88821	1	15849	0	0.18147	0.012652	0.010933	0.196085	1047	2	0.18147
SHFM1	4	0.98589	0.99113	1	18498	0	0.30737	0.012653	0.010933	0.196085	1048	3	0.30737
CACNA2D4	4	0.77471	0.77633	1	14005	0	0.19114	0.012658	0.010933	0.196085	1049	3	0.19114
FAM180A	4	0.2161	0.28895	0.904483	6039	2	-0.18079	0.012703	0.010933	0.196085	1050	1	-0.18079
CDC25B	4	0.64687	0.64111	1	11728	1	0.37374	0.012715	0.010933	0.196085	1051	3	0.37374
AMDHD1	4	0.89292	0.90567	1	16318	0	0.21147	0.01274	0.011052	0.196085	1052	3	0.21147
DPM2	4	0.68706	0.67732	1	12370	1	0.18303	0.012791	0.011052	0.196085	1053	3	0.18303
ATP13A4	4	0.97218	0.98134	1	18140	0	0.13603	0.012808	0.011052	0.196085	1054	2	0.13603
ASNSD1	4	0.074837	0.10712	0.642038	3158	1	0.19402	0.012823	0.011052	0.196085	1055	3	0.19402
PPP2R3B	4	0.97534	0.98393	1	18226	0	0.22173	0.012837	0.011052	0.196085	1056	3	0.22173
CCDC148	4	0.97465	0.98375	1	18202	0	0.246	0.012847	0.011052	0.196085	1057	3	0.246
EML2	4	0.80287	0.81081	1	14553	0	0.24799	0.012851	0.011052	0.196085	1058	3	0.24799
DNAAF2	4	0.97073	0.98069	1	18110	0	0.15604	0.01286	0.011052	0.196085	1059	2	0.15604
SAA4	4	0.87652	0.89455	1	15992	0	0.21507	0.012863	0.011052	0.196085	1060	3	0.21507
PPAPDC3	4	0.65922	0.64779	1	11931	1	0.19971	0.012876	0.011053	0.196085	1061	3	0.19971
OR56B4	4	0.67925	0.66918	1	12244	1	0.14796	0.012878	0.011053	0.196085	1062	2	0.14796
ARCN1	3	0.98711	0.99314	1	18529	0	0.28239	0.012889	0.0092929	0.189287	1063	3	0.28239
CHST13	4	0.84799	0.86661	1	15433	0	0.010007	0.012913	0.011053	0.196085	1064	1	0.010007
MBD3L5	4	0.65936	0.64779	1	11933	1	0.21506	0.01293	0.011053	0.196085	1065	3	0.21506
PGM2L1	4	0.90917	0.92231	1	16666	0	0.058192	0.012965	0.011053	0.196085	1066	1	0.058192
TMEM54	4	0.90611	0.91853	1	16605	0	0.18079	0.012968	0.011053	0.196085	1067	2	0.18079
UBQLNL	4	0.98351	0.98959	1	18440	0	0.12661	0.013017	0.011406	0.198846	1068	3	0.12661
PIANP	4	0.93487	0.94955	1	17245	0	0.13534	0.013045	0.011406	0.198846	1069	3	0.13534
ZNF333	4	0.57865	0.57226	1	10727	1	0.12948	0.013051	0.011406	0.198846	1070	2	0.12948
ZNF597	4	0.45273	0.47199	0.97887	9165	1	0.084243	0.01307	0.011406	0.198846	1071	2	0.084243
GPR61	4	0.94269	0.95674	1	17435	0	0.31149	0.013074	0.011406	0.198846	1072	3	0.31149
RUSC2	4	0.97678	0.98506	1	18268	0	0.20848	0.013128	0.011406	0.198846	1073	3	0.20848
THOC3	4	0.92112	0.93551	1	16921	0	0.18642	0.013148	0.011406	0.198846	1074	2	0.18642
PCK1	4	0.94009	0.95595	1	17376	0	0.21967	0.013157	0.011406	0.198846	1075	3	0.21967
NEFH	4	0.96421	0.97594	1	17950	0	0.20261	0.013169	0.011406	0.198846	1076	3	0.20261
TACC2	4	0.34125	0.41287	0.958075	8087	1	0.16948	0.01317	0.011406	0.198846	1077	3	0.16948
SLC24A4	4	0.95496	0.96819	1	17727	0	0.12494	0.013175	0.011406	0.198846	1078	3	0.12494
SAP130	4	0.39936	0.43763	0.962574	8633	1	0.13961	0.013182	0.01153	0.198846	1079	2	0.13961
DHCR7	4	0.89052	0.90281	1	16264	0	0.20247	0.013189	0.01153	0.198846	1080	3	0.20247
TIMM10B	4	0.92602	0.93967	1	17019	0	0.15556	0.01321	0.01153	0.198846	1081	3	0.15556
C11orf71	4	0.98149	0.98875	1	18392	0	0.13192	0.013287	0.01153	0.198846	1082	2	0.13192
KRTAP10-8	4	0.43047	0.45571	0.969516	8934	1	0.10491	0.013319	0.01153	0.198846	1083	3	0.10491
ATP6AP1L	4	0.92803	0.9416	1	17076	0	0.15271	0.013338	0.01153	0.198846	1084	3	0.15271
LRRC74A	4	0.92182	0.93551	1	16929	0	0.19021	0.01335	0.01153	0.198846	1085	2	0.19021
CSRP3	4	0.8977	0.90982	1	16401	0	0.13377	0.013384	0.01153	0.198846	1086	3	0.13377
GEMIN7	4	0.88348	0.90135	1	16124	0	0.22728	0.0134	0.01153	0.198846	1087	3	0.22728
RPH3A	4	0.95456	0.96819	1	17716	0	0.21417	0.013438	0.011531	0.198846	1088	3	0.21417
HYLS1	4	0.97099	0.98091	1	18115	0	0.25067	0.013455	0.011531	0.198846	1089	3	0.25067
SCGB2A1	4	0.93967	0.95555	1	17367	0	0.24529	0.013475	0.011531	0.198846	1090	3	0.24529
CCER1	4	0.98951	0.99407	1	18610	0	0.30841	0.013491	0.011531	0.198846	1091	3	0.30841
ZNF426	4	0.76861	0.77222	1	13892	0	0.37306	0.013504	0.011531	0.198846	1092	3	0.37306
DOT1L	4	0.35218	0.41608	0.958075	8182	1	0.21092	0.013509	0.011531	0.198846	1093	3	0.21092
CYBA	4	0.05534	0.078509	0.566066	2616	1	0.25655	0.013524	0.011531	0.198846	1094	3	0.25655
STOML3	4	0.11548	0.15715	0.742498	3999	1	0.031952	0.01354	0.011531	0.198846	1095	2	0.031952
LAMP5	4	0.72134	0.71351	1	13009	0	0.16277	0.01356	0.011531	0.198846	1096	2	0.16277
PYGM	4	0.81051	0.81797	1	14707	0	0.22765	0.013567	0.011531	0.198846	1097	3	0.22765
NDUFB10	4	0.97397	0.9828	1	18189	0	0.17128	0.013613	0.011531	0.198846	1098	3	0.17128
SLC17A3	3	0.98636	0.99267	1	18507	0	0.23585	0.013642	0.009893	0.195486	1099	3	0.23585
LTC4S	3	0.98634	0.99267	1	18506	0	0.19079	0.013656	0.0098935	0.195486	1100	3	0.19079
SLC22A18AS	4	0.94813	0.96319	1	17559	0	0.14741	0.013679	0.011825	0.201534	1101	3	0.14741
SAMD10	4	0.9476	0.96246	1	17539	0	0.075148	0.013697	0.011825	0.201534	1102	2	0.075148
NETO2	4	0.98759	0.99299	1	18550	0	0.31693	0.013716	0.011825	0.201534	1103	3	0.31693
C19orf53	4	0.97769	0.9859	1	18293	0	0.30373	0.013744	0.011825	0.201534	1104	2	0.30373
GRHPR	4	0.79497	0.80353	1	14401	0	0.17564	0.013758	0.011825	0.201534	1105	2	0.17564
LOC388780	4	0.82116	0.83255	1	14916	0	0.15587	0.013858	0.011961	0.201534	1106	2	0.15587
POLR1E	4	0.9492	0.96319	1	17583	0	0.26306	0.013886	0.011961	0.201534	1107	2	0.26306
MIA	4	0.44684	0.47199	0.97887	9104	1	0.14267	0.013907	0.011961	0.201534	1108	2	0.14267
IL27RA	4	0.75216	0.7508	1	13590	0	0.32606	0.013958	0.011961	0.201534	1109	3	0.32606
TUB	4	0.89719	0.90916	1	16392	0	0.17891	0.013987	0.011961	0.201534	1110	3	0.17891
ADGRD1	3	0.93001	0.94942	1	17115	0	0.46706	0.014003	0.010007	0.196085	1111	2	0.46706
RPL39	4	0.81039	0.81797	1	14702	0	0.31867	0.014051	0.011961	0.201534	1112	2	0.31867
THAP4	4	0.95446	0.96819	1	17712	0	0.10635	0.014086	0.011961	0.201534	1113	2	0.10635
GRAMD3	4	0.90453	0.91787	1	16568	0	0.37602	0.01415	0.011961	0.201534	1114	3	0.37602
TMEM252	4	0.92322	0.93761	1	16950	0	0.33846	0.014168	0.011961	0.201534	1115	3	0.33846
TSLP	4	0.43163	0.45733	0.970055	8946	1	0.36559	0.014177	0.011961	0.201534	1116	3	0.36559
RPS19BP1	4	0.2977	0.38528	0.943071	7696	1	0.2829	0.014182	0.011961	0.201534	1117	3	0.2829
PNCK	4	0.78636	0.78958	1	14222	0	0.1564	0.014186	0.011961	0.201534	1118	3	0.1564
CACNG2	4	0.92422	0.93915	1	16970	0	0.16176	0.014236	0.011961	0.201534	1119	3	0.16176
CPVL	4	0.88215	0.89918	1	16092	0	-0.016431	0.014273	0.011961	0.201534	1120	1	-0.016431
ANKHD1	4	0.95096	0.96455	1	17622	0	0.2283	0.014274	0.011961	0.201534	1121	3	0.2283
PRNP	4	0.97261	0.98156	1	18152	0	0.15851	0.014284	0.011961	0.201534	1122	3	0.15851
CEP85L	4	0.96888	0.98001	1	18055	0	0.30642	0.014295	0.011961	0.201534	1123	3	0.30642
DUS1L	4	0.88707	0.90281	1	16203	0	0.21996	0.014301	0.011961	0.201534	1124	3	0.21996
PCDHB15	4	0.95768	0.97028	1	17794	0	0.35614	0.014314	0.012095	0.202554	1125	3	0.35614
LNP1	4	0.71188	0.70205	1	12824	1	0.30265	0.014318	0.012095	0.202554	1126	3	0.30265
ZNF274	4	0.47622	0.49496	0.998341	9424	1	0.066936	0.014325	0.012095	0.202554	1127	2	0.066936
CCZ1B	4	0.72821	0.72163	1	13147	0	0.22537	0.014326	0.012095	0.202554	1128	3	0.22537
UIMC1	4	0.69943	0.69043	1	12567	1	0.030611	0.014377	0.012096	0.202554	1129	1	0.030611
HIST1H1C	4	0.6003	0.59531	1	11035	1	0.28832	0.01441	0.012096	0.202554	1130	3	0.28832
SEPP1	4	0.98846	0.99349	1	18576	0	0.25853	0.01443	0.012096	0.202554	1131	3	0.25853
OR52E2	4	0.79327	0.80227	1	14358	0	0.24738	0.014447	0.012238	0.203877	1132	3	0.24738
PIH1D2	4	0.32326	0.40297	0.957614	7922	1	0.3155	0.014498	0.012238	0.203877	1133	3	0.3155
TLDC2	4	0.86319	0.88075	1	15723	0	0.18029	0.014505	0.012238	0.203877	1134	3	0.18029
GATAD2A	4	0.45992	0.48337	0.99071	9244	1	0.081815	0.014512	0.012238	0.203877	1135	2	0.081815
C11orf87	4	0.93208	0.94741	1	17168	0	0.14219	0.014534	0.012238	0.203877	1136	3	0.14219
TPM4	4	0.5283	0.53947	1	10039	1	0.21671	0.014598	0.012239	0.203877	1137	3	0.21671
MGC50722	4	0.81104	0.81797	1	14718	0	0.25727	0.014629	0.012376	0.205091	1138	2	0.25727
CMIP	4	0.80471	0.81202	1	14589	0	0.081185	0.014691	0.012376	0.205091	1139	1	0.081185
GNAQ	4	0.91796	0.93384	1	16845	0	0.20549	0.014746	0.012376	0.205091	1140	3	0.20549
FOXI2	4	0.29421	0.37939	0.935126	7630	1	0.1397	0.014775	0.012376	0.205091	1141	2	0.1397
AGAP4	3	0.98521	0.99243	1	18485	0	0.51337	0.014794	0.010815	0.196085	1142	3	0.51337
NNMT	4	0.79796	0.80353	1	14460	0	0.011004	0.014795	0.012376	0.205091	1143	1	0.011004
LRRC55	4	0.033562	0.042258	0.442422	1812	3	-0.13457	0.014848	0.012376	0.205091	1144	1	-0.13457
PDCD1	3	0.98512	0.99219	1	18479	0	0.30757	0.014882	0.011051	0.196085	1145	3	0.30757
BAG6	4	0.71222	0.70205	1	12834	1	0.23615	0.014952	0.012507	0.205918	1146	3	0.23615
OTOR	4	0.97155	0.98112	1	18126	0	0.14899	0.014972	0.012507	0.205918	1147	3	0.14899
KIAA0040	4	0.65308	0.64611	1	11827	1	0.16038	0.014975	0.012507	0.205918	1148	3	0.16038
VWA8	4	0.64777	0.64281	1	11744	1	0.15426	0.015004	0.012652	0.205918	1149	2	0.15426
CCNA1	4	0.88833	0.90281	1	16231	0	0.22729	0.015033	0.012652	0.205918	1150	3	0.22729
PALB2	4	0.3133	0.39812	0.953126	7846	1	0.029574	0.015057	0.012652	0.205918	1151	2	0.029574
ZNF688	4	0.94774	0.96246	1	17547	0	0.24591	0.0151	0.012652	0.205918	1152	3	0.24591
KNDC1	4	0.43672	0.45893	0.970543	8997	1	0.18911	0.015105	0.012652	0.205918	1153	3	0.18911
KRTAP19-4	4	0.21276	0.28335	0.896513	5983	1	-0.043654	0.015109	0.012652	0.205918	1154	1	-0.043654
SEC13	4	0.97661	0.98506	1	18265	0	0.41141	0.015203	0.012652	0.205918	1155	3	0.41141
C9orf41	4	0.83709	0.84922	1	15217	0	0.26608	0.015213	0.012652	0.205918	1156	2	0.26608
NIPBL	4	0.98516	0.99076	1	18482	0	0.22255	0.015266	0.012652	0.205918	1157	2	0.22255
DUSP12	4	0.7215	0.71351	1	13013	0	0.17105	0.015318	0.012652	0.205918	1158	3	0.17105
ENGASE	4	0.8245	0.83575	1	14984	0	0.27702	0.015422	0.012652	0.205918	1159	3	0.27702
RNASEH2C	4	0.72665	0.72	1	13117	0	0.19342	0.015434	0.012652	0.205918	1160	3	0.19342
KANSL1L	3	0.018652	0.025194	0.380338	1202	2	-0.07098	0.015439	0.011555	0.199087	1161	1	-0.07098
XBP1	4	0.98622	0.99148	1	18503	0	0.22405	0.015469	0.012652	0.205918	1162	3	0.22405
GSTCD	4	0.95409	0.96786	1	17704	0	0.29354	0.015487	0.012652	0.205918	1163	2	0.29354
NFATC2	4	0.45962	0.48337	0.99071	9242	1	0.25298	0.015527	0.012652	0.205918	1164	2	0.25298
PRPS1	4	0.55428	0.56076	1	10383	1	0.10026	0.015547	0.012652	0.205918	1165	2	0.10026
RET	4	0.16973	0.22605	0.833978	5131	2	0.02762	0.015599	0.012652	0.205918	1166	2	0.02762
SPINK14	4	0.66738	0.65595	1	12061	1	0.2159	0.015627	0.012652	0.205918	1167	3	0.2159
FOXD4L4	3	0.87304	0.89426	1	15931	0	0.17374	0.015635	0.011871	0.201534	1168	2	0.17374
FAM214B	4	0.98383	0.98959	1	18449	0	0.26195	0.015672	0.012803	0.207137	1169	3	0.26195
NEK10	4	0.71624	0.70697	1	12907	1	0.1032	0.015684	0.012803	0.207137	1170	2	0.1032
OCM2	4	0.49693	0.50978	1	9664	1	0.21849	0.015705	0.012803	0.207137	1171	2	0.21849
ARFGAP2	4	0.24524	0.32257	0.913698	6634	2	0.076065	0.015712	0.012803	0.207137	1172	2	0.076065
FZD10	4	0.97971	0.98721	1	18354	0	0.28008	0.01572	0.012803	0.207137	1173	3	0.28008
EBF2	4	0.030995	0.038262	0.425786	1707	2	-0.24655	0.015736	0.012803	0.207137	1174	1	-0.24655
EML3	4	0.95294	0.96656	1	17664	0	0.23688	0.01575	0.012803	0.207137	1175	3	0.23688
HRH2	4	0.61866	0.61492	1	11284	1	0.14069	0.0158	0.013121	0.211747	1176	3	0.14069
SHD	4	0.94689	0.96175	1	17528	0	0.23992	0.015807	0.013121	0.211747	1177	3	0.23992
SERPINA4	4	0.53521	0.54438	1	10139	1	0.16903	0.015826	0.013121	0.211747	1178	3	0.16903
EPB42	4	0.91659	0.93164	1	16813	0	0.2204	0.015879	0.013272	0.212031	1179	3	0.2204
KCNK18	4	0.79662	0.80353	1	14435	0	0.12573	0.015945	0.013272	0.212031	1180	3	0.12573
OLFML1	4	0.95224	0.96524	1	17647	0	0.18951	0.015955	0.013272	0.212031	1181	3	0.18951
MADD	4	0.9773	0.98575	1	18280	0	0.25142	0.015959	0.013272	0.212031	1182	3	0.25142
PKD2L2	4	0.95353	0.9669	1	17684	0	0.10966	0.015997	0.013272	0.212031	1183	2	0.10966
ANKRD20A3	4	0.5446	0.54769	1	10250	1	0.1341	0.016015	0.013272	0.212031	1184	2	0.1341
SERGEF	4	0.48822	0.50317	0.998341	9560	1	0.19004	0.016035	0.013272	0.212031	1185	3	0.19004
N4BP3	4	0.14737	0.1955	0.792072	4664	2	0.038084	0.016049	0.013272	0.212031	1186	2	0.038084
ZNF367	4	0.95306	0.96656	1	17666	0	0.20747	0.016053	0.013272	0.212031	1187	3	0.20747
RPN2	2	0.98394	0.99309	1	18452	0	0.37051	0.016055	0.0069123	0.164681	1188	2	0.37051
MUC16	4	0.98565	0.99101	1	18493	0	0.18709	0.016084	0.013272	0.212031	1189	3	0.18709
YIPF2	4	0.96618	0.97745	1	17997	0	0.25985	0.016087	0.013272	0.212031	1190	3	0.25985
AFAP1L1	4	0.58344	0.57879	1	10793	1	0.068042	0.016101	0.013272	0.212031	1191	1	0.068042
SERINC3	4	0.92089	0.93551	1	16913	0	0.26036	0.016198	0.013455	0.214075	1192	3	0.26036
KDM5C	4	0.5293	0.53947	1	10050	1	0.32536	0.016261	0.013456	0.214075	1193	3	0.32536
SDCCAG3	4	0.053312	0.072908	0.545227	2545	1	0.2698	0.016307	0.013456	0.214075	1194	3	0.2698
MAP1LC3A	4	0.40804	0.44418	0.965415	8721	1	0.10538	0.01631	0.013456	0.214075	1195	2	0.10538
KCNK15	4	0.98687	0.99204	1	18522	0	0.28123	0.01631	0.013456	0.214075	1196	3	0.28123
MKI67	4	0.84555	0.86185	1	15382	0	0.20537	0.016352	0.013602	0.214798	1197	2	0.20537
SLITRK2	4	0.98771	0.99308	1	18554	0	0.26598	0.016388	0.013602	0.214798	1198	3	0.26598
CRHBP	4	0.97177	0.98112	1	18130	0	0.24031	0.016425	0.013602	0.214798	1199	3	0.24031
SPSB1	4	0.61901	0.61492	1	11288	1	0.19633	0.016458	0.013602	0.214798	1200	3	0.19633
TMBIM6	4	0.22967	0.30253	0.904609	6316	1	0.1273	0.016506	0.013603	0.214798	1201	2	0.1273
DCAF8	4	0.9742	0.9832	1	18196	0	0.19162	0.016552	0.013603	0.214798	1202	2	0.19162
GAPT	4	0.71717	0.71022	1	12927	1	0.097652	0.016571	0.013603	0.214798	1203	3	0.097652
NCBP1	4	0.86443	0.88409	1	15752	0	0.34568	0.016618	0.013603	0.214798	1204	3	0.34568
IRX1	4	0.012075	0.015911	0.325563	921	1	0.029768	0.016676	0.013603	0.214798	1205	2	0.029768
SLC9A3	4	0.22672	0.30017	0.904609	6268	1	0.24048	0.016749	0.013766	0.216498	1206	3	0.24048
FAM65C	4	0.97823	0.98607	1	18309	0	0.13695	0.016792	0.013767	0.216498	1207	2	0.13695
MBD3L1	4	0.97344	0.9828	1	18176	0	0.18367	0.016824	0.013767	0.216498	1208	3	0.18367
VSNL1	4	0.89707	0.90916	1	16389	0	0.10483	0.016884	0.01393	0.217454	1209	2	0.10483
ECSCR	4	0.86219	0.87907	1	15702	0	0.16472	0.016907	0.01393	0.217454	1210	3	0.16472
IFNE	4	0.93425	0.9487	1	17225	0	0.16332	0.016911	0.01393	0.217454	1211	3	0.16332
FKBPL	4	0.18147	0.23991	0.846046	5365	1	0.092325	0.016937	0.01393	0.217454	1212	2	0.092325
CYP4F12	4	0.87251	0.88983	1	15919	0	0.15939	0.01694	0.01393	0.217454	1213	2	0.15939
TMC6	4	0.18628	0.24729	0.862381	5460	1	0.22326	0.01696	0.01393	0.217454	1214	3	0.22326
ZHX3	4	0.92766	0.94114	1	17067	0	0.17723	0.016989	0.01393	0.217454	1215	2	0.17723
GOLM1	4	0.26234	0.33933	0.913698	6999	1	0.1395	0.017041	0.01393	0.217454	1216	2	0.1395
TNFSF9	4	0.96788	0.97978	1	18037	0	0.22555	0.017046	0.01393	0.217454	1217	3	0.22555
LCE4A	4	0.12773	0.17885	0.786805	4257	2	-0.089101	0.017093	0.014129	0.219651	1218	1	-0.089101
CRYGN	4	0.90372	0.91725	1	16545	0	0.25169	0.017123	0.014129	0.219651	1219	3	0.25169
CCHCR1	4	0.9795	0.98707	1	18347	0	0.18239	0.017167	0.014277	0.219651	1220	2	0.18239
MTRNR2L4	4	0.85762	0.87114	1	15605	0	0.18366	0.017248	0.014277	0.219651	1221	3	0.18366
IRAK3	4	0.33814	0.41287	0.958075	8055	1	0.19403	0.017256	0.014277	0.219651	1222	3	0.19403
HES3	4	0.78513	0.78958	1	14202	0	0.087601	0.017302	0.014277	0.219651	1223	2	0.087601
SLC36A1	4	0.49427	0.50818	1	9637	1	0.081721	0.017333	0.014277	0.219651	1224	2	0.081721
NDUFAF2	4	0.96605	0.97721	1	17994	0	0.29539	0.017348	0.014277	0.219651	1225	3	0.29539
LIFR	4	0.92052	0.93551	1	16907	0	0.19702	0.017357	0.014277	0.219651	1226	3	0.19702
RPGR	4	0.25317	0.32931	0.913698	6801	1	0.14866	0.017458	0.014278	0.219651	1227	2	0.14866
COL20A1	4	0.91278	0.92821	1	16737	0	0.20122	0.017475	0.014278	0.219651	1228	2	0.20122
SLC25A43	4	0.43781	0.46379	0.978293	9006	1	0.20506	0.017482	0.014278	0.219651	1229	3	0.20506
SNAPC4	4	0.59872	0.59531	1	11014	1	0.29601	0.017491	0.014278	0.219651	1230	2	0.29601
FAM134B	4	0.94697	0.96211	1	17531	0	0.29794	0.017509	0.014278	0.219651	1231	3	0.29794
ATP13A1	4	0.81458	0.82486	1	14775	0	0.10749	0.01751	0.014278	0.219651	1232	2	0.10749
SLC25A18	4	0.87388	0.89064	1	15948	0	0.08145	0.017563	0.014278	0.219651	1233	2	0.08145
SLC25A36	4	0.98466	0.99051	1	18468	0	0.21629	0.017578	0.014278	0.219651	1234	3	0.21629
RAF1	4	0.95047	0.96455	1	17609	0	0.32238	0.01759	0.014278	0.219651	1235	3	0.32238
PTGIS	4	0.64193	0.63613	1	11650	1	0.2288	0.017652	0.014481	0.222392	1236	3	0.2288
TSPAN17	4	0.5371	0.54438	1	10158	1	0.1481	0.017667	0.014481	0.222392	1237	2	0.1481
KLK1	4	0.27101	0.35335	0.922211	7168	1	0.2241	0.017691	0.014699	0.222392	1238	3	0.2241
FMNL1	4	0.064696	0.099642	0.623869	2939	2	-0.073611	0.017719	0.014699	0.222392	1239	1	-0.073611
CRLF1	4	0.90347	0.91725	1	16540	0	0.29278	0.017721	0.014699	0.222392	1240	3	0.29278
NOX4	4	0.68458	0.6708	1	12327	1	0.22181	0.017765	0.014699	0.222392	1241	3	0.22181
CCNG1	4	0.90213	0.9166	1	16511	0	0.23758	0.017771	0.014699	0.222392	1242	2	0.23758
MICU1	3	0.98222	0.99063	1	18411	0	0.25352	0.017776	0.013718	0.216274	1243	3	0.25352
ZNF79	4	0.91294	0.92821	1	16739	0	0.31728	0.017807	0.014699	0.222392	1244	3	0.31728
KIAA1107	4	0.28591	0.3705	0.934789	7459	2	-0.03316	0.017823	0.014699	0.222392	1245	1	-0.03316
SYCE2	4	0.86966	0.88905	1	15865	0	0.19511	0.017835	0.014699	0.222392	1246	3	0.19511
SPATA31D4	4	0.3647	0.42269	0.96036	8290	1	0.11877	0.017849	0.014699	0.222392	1247	2	0.11877
GPR37L1	3	0.49899	0.48928	0.992822	9682	1	0.020379	0.017869	0.013719	0.216274	1248	1	0.020379
TSGA10IP	4	0.97612	0.98505	1	18250	0	0.26283	0.017909	0.014699	0.222392	1249	3	0.26283
TTC33	4	0.97839	0.98607	1	18316	0	0.20591	0.017917	0.014699	0.222392	1250	3	0.20591
MED1	4	0.82389	0.83575	1	14976	0	0.075606	0.017928	0.014699	0.222392	1251	1	0.075606
SBNO2	4	0.32424	0.40297	0.957614	7933	1	0.13317	0.017929	0.014699	0.222392	1252	2	0.13317
VAMP5	4	0.81967	0.83032	1	14887	0	0.2285	0.017948	0.014699	0.222392	1253	3	0.2285
TAC4	4	0.011374	0.014788	0.315016	881	3	-0.32102	0.01798	0.014699	0.222392	1254	1	-0.32102
ISPD	4	0.19234	0.25691	0.865428	5594	1	0.19054	0.017993	0.014699	0.222392	1255	3	0.19054
TMEM120B	4	0.25164	0.32931	0.913698	6771	1	0.24136	0.018082	0.014699	0.222392	1256	3	0.24136
KRT75	4	0.46159	0.48337	0.99071	9267	1	0.041896	0.018084	0.014699	0.222392	1257	2	0.041896
NT5C1A	4	0.89451	0.90709	1	16341	0	0.29484	0.018105	0.014843	0.222392	1258	3	0.29484
BRIX1	2	0.98189	0.99086	1	18401	0	0.19594	0.018109	0.0091359	0.187497	1259	2	0.19594
ARPC3	4	0.96367	0.9757	1	17937	0	0.33248	0.018121	0.014843	0.222392	1260	3	0.33248
VAT1L	4	0.25279	0.32931	0.913698	6792	2	0.1195	0.01813	0.014843	0.222392	1261	2	0.1195
HCAR2	4	0.94253	0.95674	1	17432	0	0.066897	0.018136	0.014843	0.222392	1262	2	0.066897
IQGAP2	4	0.97876	0.98642	1	18326	0	0.2373	0.018146	0.014843	0.222392	1263	3	0.2373
ISM1	4	0.30356	0.38828	0.944466	7763	1	0.091558	0.018188	0.014844	0.222392	1264	2	0.091558
FLG2	4	0.77373	0.77633	1	13987	0	0.29742	0.018253	0.015008	0.222392	1265	3	0.29742
DLX3	4	0.21313	0.28335	0.896513	5991	2	0.10292	0.018259	0.015008	0.222392	1266	2	0.10292
FAM122A	4	0.79396	0.80227	1	14372	0	0.17427	0.018291	0.015008	0.222392	1267	3	0.17427
KLHL26	4	0.79814	0.80353	1	14465	0	0.092211	0.018293	0.015008	0.222392	1268	2	0.092211
LCE1E	4	0.86755	0.88742	1	15815	0	0.26274	0.018316	0.015008	0.222392	1269	3	0.26274
COL15A1	4	0.24327	0.31942	0.913698	6589	1	0.044267	0.018345	0.015008	0.222392	1270	2	0.044267
ZNF682	4	0.47723	0.49662	0.998341	9440	1	0.18634	0.018362	0.015008	0.222392	1271	3	0.18634
TTC9B	4	0.61421	0.61158	1	11225	1	0.19291	0.018372	0.015008	0.222392	1272	2	0.19291
CILP2	4	0.63544	0.63285	1	11546	1	0.21137	0.018382	0.015008	0.222392	1273	3	0.21137
C9orf72	4	0.11635	0.15715	0.742498	4018	1	0.11611	0.018397	0.015008	0.222392	1274	2	0.11611
WDR13	4	0.29758	0.38528	0.943071	7694	1	0.047585	0.018397	0.015008	0.222392	1275	2	0.047585
FAM19A1	4	0.67367	0.6626	1	12169	1	0.12116	0.018405	0.015008	0.222392	1276	2	0.12116
ABCA8	4	0.22195	0.29649	0.904609	6165	1	0.23249	0.018433	0.015008	0.222392	1277	3	0.23249
RAB39A	4	0.80641	0.81322	1	14627	0	0.19228	0.018445	0.015008	0.222392	1278	3	0.19228
NOB1	4	0.95447	0.96819	1	17713	0	0.24882	0.018486	0.015009	0.222392	1279	2	0.24882
FAM207A	4	0.90124	0.91593	1	16487	0	0.18212	0.018576	0.015009	0.222392	1280	2	0.18212
OR51B4	4	0.90168	0.91593	1	16498	0	0.26795	0.018581	0.015009	0.222392	1281	3	0.26795
GFPT2	4	0.51231	0.52947	1	9848	1	0.2165	0.018589	0.015009	0.222392	1282	3	0.2165
LRRN4	4	0.97423	0.9832	1	18197	0	0.23378	0.018609	0.015009	0.222392	1283	3	0.23378
GTPBP3	4	0.97735	0.98575	1	18282	0	0.14924	0.018665	0.015009	0.222392	1284	3	0.14924
PLRG1	4	0.74383	0.7403	1	13430	0	0.25561	0.018706	0.015167	0.222392	1285	2	0.25561
MYH7B	4	0.91245	0.92763	1	16732	0	0.20983	0.01871	0.015167	0.222392	1286	3	0.20983
RPSA	2	0.49017	0.48751	0.992822	9592	0	0.23595	0.018714	0.0095484	0.191639	1287	1	0.23595
AKAP8	4	0.94373	0.9595	1	17453	0	0.17487	0.018747	0.015167	0.222392	1288	3	0.17487
PGBD1	4	0.16278	0.2196	0.833978	4978	2	0.03468	0.018763	0.015167	0.222392	1289	2	0.03468
ZBED3	4	0.92865	0.94263	1	17089	0	0.15484	0.018771	0.015167	0.222392	1290	2	0.15484
MTHFSD	4	0.94359	0.9591	1	17450	0	0.32464	0.018788	0.015167	0.222392	1291	3	0.32464
FKBP14	4	0.81844	0.82815	1	14860	0	0.19259	0.018794	0.015167	0.222392	1292	3	0.19259
NPTX2	4	0.80084	0.8084	1	14517	0	0.083263	0.018814	0.015168	0.222392	1293	2	0.083263
KRTAP12-1	4	0.78848	0.79352	1	14264	0	0.23206	0.018853	0.015168	0.222392	1294	2	0.23206
PRRG3	4	0.85496	0.86936	1	15551	0	0.14118	0.018862	0.015168	0.222392	1295	2	0.14118
PRKACG	4	0.41786	0.44915	0.965782	8816	1	0.15698	0.018883	0.015168	0.222392	1296	3	0.15698
KCTD17	4	0.93456	0.94913	1	17238	0	0.20131	0.018887	0.015168	0.222392	1297	3	0.20131
LDHAL6A	3	0.93453	0.95277	1	17236	0	0.097429	0.018887	0.014915	0.222392	1298	1	0.097429
CCL19	4	0.90256	0.91725	1	16518	0	0.27913	0.018907	0.015168	0.222392	1299	3	0.27913
NAT10	4	0.63466	0.63285	1	11536	1	0.15584	0.018918	0.015168	0.222392	1300	2	0.15584
CCDC62	4	0.8926	0.90567	1	16310	0	0.23249	0.018935	0.015317	0.222392	1301	3	0.23249
ERCC6L2	4	0.27451	0.35335	0.922211	7233	1	0.13237	0.018944	0.015317	0.222392	1302	2	0.13237
SLPI	4	0.96301	0.97518	1	17917	0	0.22242	0.01898	0.015317	0.222392	1303	3	0.22242
KDM4B	4	0.56596	0.569	1	10545	1	0.24381	0.018993	0.015317	0.222392	1304	3	0.24381
ATXN10	4	0.88263	0.89991	1	16107	0	0.28344	0.019	0.015317	0.222392	1305	3	0.28344
TCFL5	4	0.89923	0.91186	1	16440	0	0.24896	0.019004	0.015317	0.222392	1306	3	0.24896
DAGLA	4	0.86799	0.88742	1	15826	0	0.21847	0.019016	0.015317	0.222392	1307	3	0.21847
TPR	4	0.98366	0.98959	1	18444	0	0.19968	0.019022	0.015317	0.222392	1308	2	0.19968
NDUFV3	4	0.70749	0.69872	1	12731	1	0.17905	0.019074	0.015317	0.222392	1309	2	0.17905
TRH	4	0.6458	0.63951	1	11701	1	0.15986	0.019122	0.015317	0.222392	1310	3	0.15986
TTI2	4	0.35288	0.41608	0.958075	8190	1	0.12112	0.019126	0.015317	0.222392	1311	2	0.12112
ATP8B1	4	0.19974	0.2659	0.877032	5734	1	0.18762	0.019141	0.015317	0.222392	1312	3	0.18762
HSF2BP	4	0.91332	0.92821	1	16751	0	0.0084162	0.019178	0.015317	0.222392	1313	1	0.0084162
DUPD1	4	0.29709	0.38385	0.943071	7683	1	0.2285	0.019224	0.015544	0.223993	1314	3	0.2285
SCNN1A	4	0.73876	0.73722	1	13341	0	0.090587	0.019231	0.015544	0.223993	1315	2	0.090587
RWDD2B	4	0.75898	0.75816	1	13721	0	0.20544	0.019257	0.015544	0.223993	1316	3	0.20544
TMEM191B	4	0.85222	0.86661	1	15504	0	0.13462	0.01929	0.015544	0.223993	1317	2	0.13462
TOMM20L	4	0.14052	0.18928	0.786805	4524	1	0.12758	0.019335	0.015544	0.223993	1318	2	0.12758
ZYX	4	0.00055485	0.0004915	0.06352	142	1	0.16949	0.019339	0.015545	0.223993	1319	3	0.16949
CEP126	4	0.60006	0.59531	1	11028	1	0.24818	0.019357	0.015545	0.223993	1320	2	0.24818
ECHS1	4	0.15761	0.21249	0.825386	4879	1	0.20093	0.019378	0.015545	0.223993	1321	3	0.20093
NACC1	4	0.98419	0.98987	1	18460	0	0.20925	0.019382	0.015545	0.223993	1322	3	0.20925
TMEM151B	4	0.79509	0.80353	1	14405	0	0.25047	0.019392	0.015545	0.223993	1323	3	0.25047
CLUL1	4	0.93258	0.94741	1	17183	0	0.22514	0.019531	0.01572	0.224332	1324	3	0.22514
BECN2	4	0.58052	0.5739	1	10751	1	0.093268	0.019543	0.01572	0.224332	1325	2	0.093268
FAM104A	4	0.46833	0.48835	0.992822	9341	1	0.22469	0.019565	0.01572	0.224332	1326	2	0.22469
CUL2	4	0.080359	0.11512	0.660629	3278	1	0.093385	0.019595	0.01572	0.224332	1327	2	0.093385
LOC101929372	4	0.59251	0.58373	1	10928	1	0.064802	0.019647	0.01572	0.224332	1328	2	0.064802
TBC1D2	4	0.89442	0.90709	1	16339	0	0.23227	0.019648	0.01572	0.224332	1329	3	0.23227
OCIAD2	4	0.88306	0.90063	1	16116	0	0.20905	0.019648	0.01572	0.224332	1330	3	0.20905
DDX39A	4	0.61303	0.60679	1	11215	1	0.30016	0.019716	0.015721	0.224332	1331	3	0.30016
IAPP	4	0.13937	0.18838	0.786805	4500	2	0.012565	0.019751	0.015721	0.224332	1332	2	0.012565
KIAA1033	4	0.94455	0.96028	1	17474	0	0.19008	0.019768	0.015721	0.224332	1333	3	0.19008
KIF27	4	0.86535	0.88659	1	15768	0	0.28844	0.019799	0.015721	0.224332	1334	3	0.28844
ALDH3B1	4	0.8506	0.86661	1	15476	0	-0.026847	0.019803	0.015721	0.224332	1335	1	-0.026847
DEFB115	4	0.9754	0.98432	1	18228	0	0.22043	0.019832	0.015721	0.224332	1336	3	0.22043
GRAMD4	3	0.94423	0.96008	1	17467	0	0.19989	0.019881	0.016007	0.227904	1337	2	0.19989
HARBI1	4	0.82405	0.83575	1	14979	0	0.25129	0.019899	0.015905	0.226619	1338	3	0.25129
OR4A15	4	0.74715	0.74632	1	13498	0	0.31405	0.019908	0.015905	0.226619	1339	3	0.31405
SCGB1A1	4	0.6537	0.64611	1	11836	1	0.16105	0.019941	0.016068	0.228434	1340	2	0.16105
WFDC2	4	0.92801	0.9416	1	17075	0	0.25185	0.020017	0.016068	0.228434	1341	2	0.25185
TOP1MT	4	0.61855	0.61492	1	11282	1	0.021222	0.020064	0.016224	0.230472	1342	1	0.021222
FTSJ2	2	0.82772	0.86141	1	15049	0	0.3533	0.020075	0.010771	0.196085	1343	1	0.3533
TRPC6	4	0.38466	0.43099	0.96036	8482	1	0.1505	0.020103	0.016412	0.23109	1344	3	0.1505
HMCN2	4	0.64388	0.63951	1	11672	1	0.17364	0.020124	0.016412	0.23109	1345	3	0.17364
MMP24	4	0.69984	0.69043	1	12576	1	0.17444	0.02014	0.016412	0.23109	1346	3	0.17444
ALG9	4	0.90407	0.91725	1	16555	0	0.021513	0.020168	0.016412	0.23109	1347	1	0.021513
GM2A	4	0.85556	0.86936	1	15561	0	0.23007	0.020195	0.016412	0.23109	1348	3	0.23007
KCNQ1	4	0.56847	0.569	1	10570	1	0.22707	0.020223	0.016412	0.23109	1349	3	0.22707
PELI3	4	0.98687	0.99204	1	18521	0	0.20145	0.020237	0.016412	0.23109	1350	2	0.20145
TAB3	4	0.95494	0.96819	1	17726	0	0.23064	0.020254	0.016412	0.23109	1351	2	0.23064
AP1B1	4	0.77145	0.7736	1	13946	0	0.33665	0.020275	0.016412	0.23109	1352	3	0.33665
POU5F1	4	0.9493	0.96319	1	17586	0	0.18786	0.020288	0.016412	0.23109	1353	3	0.18786
GNG10	4	0.023843	0.030164	0.399692	1427	2	-0.027104	0.020324	0.016412	0.23109	1354	2	-0.027104
ETFDH	4	0.93916	0.95515	1	17352	0	0.15158	0.02033	0.016412	0.23109	1355	3	0.15158
SPATA31A5	4	0.88499	0.90208	1	16151	0	0.24788	0.0204	0.016634	0.233868	1356	3	0.24788
MYBPC3	4	0.97945	0.98692	1	18346	0	0.097678	0.02048	0.016811	0.233944	1357	2	0.097678
LEMD2	4	0.099857	0.1394	0.713291	3668	2	0.074549	0.0205	0.016812	0.233944	1358	2	0.074549
MEF2BNB-MEF2B	4	0.93364	0.94827	1	17210	0	0.1364	0.020521	0.016812	0.233944	1359	3	0.1364
KDELR2	4	0.16415	0.2196	0.833978	5012	1	0.22303	0.020526	0.016812	0.233944	1360	3	0.22303
TNFSF14	4	0.75972	0.75816	1	13731	0	0.13717	0.020564	0.016982	0.233944	1361	3	0.13717
E2F3	3	0.70329	0.71243	1	12656	0	0.40929	0.020568	0.016982	0.233944	1362	2	0.40929
PTH2	4	0.9609	0.97362	1	17863	0	0.25854	0.02057	0.016982	0.233944	1363	3	0.25854
ILDR2	4	0.95893	0.97147	1	17825	0	0.15208	0.020581	0.016982	0.233944	1364	3	0.15208
AP3S1	4	0.92643	0.94017	1	17029	0	0.21477	0.020585	0.016982	0.233944	1365	3	0.21477
SPACA5B	4	0.62116	0.61492	1	11326	1	0.13942	0.020636	0.016982	0.233944	1366	3	0.13942
CEP57	4	0.96503	0.97673	1	17967	0	0.29363	0.020637	0.016982	0.233944	1367	3	0.29363
HIST1H4A	4	0.97323	0.98239	1	18167	0	0.13888	0.020654	0.016982	0.233944	1368	3	0.13888
GDPD5	4	0.57607	0.57226	1	10688	1	0.17589	0.020688	0.016982	0.233944	1369	3	0.17589
CYB561A3	4	0.94762	0.96246	1	17542	0	0.10161	0.020714	0.016982	0.233944	1370	2	0.10161
MRGBP	4	0.98963	0.99416	1	18614	0	0.29888	0.020761	0.016982	0.233944	1371	3	0.29888
CHCHD5	4	0.98639	0.99148	1	18511	0	0.22882	0.020769	0.016982	0.233944	1372	3	0.22882
GTF3A	4	0.62836	0.62305	1	11443	1	0.28475	0.020812	0.016982	0.233944	1373	3	0.28475
OR56A1	4	0.98948	0.99407	1	18608	0	0.19486	0.020825	0.016982	0.233944	1374	3	0.19486
MTRR	4	0.76594	0.76388	1	13853	0	0.17055	0.020834	0.016982	0.233944	1375	2	0.17055
C9orf173	4	0.79216	0.80227	1	14333	0	0.1558	0.020881	0.016982	0.233944	1376	3	0.1558
B4GALNT4	4	0.9625	0.9749	1	17908	0	0.26769	0.020894	0.016982	0.233944	1377	3	0.26769
HSD17B14	4	0.98003	0.98721	1	18361	0	0.17584	0.020894	0.016982	0.233944	1378	3	0.17584
NADK2	4	0.90772	0.92107	1	16637	0	0.25207	0.020911	0.016982	0.233944	1379	3	0.25207
KCNJ3	4	0.62273	0.61818	1	11358	1	0.17629	0.020928	0.016982	0.233944	1380	3	0.17629
CACNA1S	4	0.35285	0.41608	0.958075	8189	1	0.30402	0.020941	0.016982	0.233944	1381	3	0.30402
PAPD7	4	0.48533	0.50317	0.998341	9529	1	0.22199	0.020963	0.016982	0.233944	1382	3	0.22199
AFF2	4	0.98353	0.98959	1	18441	0	0.21205	0.020967	0.016982	0.233944	1383	3	0.21205
RPA3	2	0.979	0.98815	1	18332	0	0.44753	0.020997	0.011854	0.201534	1384	2	0.44753
C22orf39	4	0.56156	0.56575	1	10485	1	0.026019	0.021	0.016982	0.233944	1385	1	0.026019
CYP4F3	4	0.38657	0.43267	0.96036	8503	1	0.2836	0.021023	0.01723	0.235671	1386	3	0.2836
TRRAP	3	0.97896	0.98905	1	18330	0	0.36227	0.021035	0.017536	0.239114	1387	3	0.36227
RBP1	4	0.19817	0.26137	0.872471	5701	2	-0.012083	0.021052	0.01723	0.235671	1388	2	-0.012083
POLR3H	3	0.75488	0.77772	1	13646	0	-0.044829	0.021077	0.017789	0.240379	1389	1	-0.044829
OR5W2	4	0.90741	0.92043	1	16630	0	0.20172	0.02108	0.01723	0.235671	1390	3	0.20172
PRAMEF14	4	0.25406	0.33186	0.913698	6815	1	0.20497	0.021092	0.01723	0.235671	1391	3	0.20497
SLC6A15	4	0.66903	0.65595	1	12084	1	0.15227	0.0211	0.017231	0.235671	1392	2	0.15227
PI3	4	0.73538	0.73415	1	13278	0	0.17371	0.021104	0.017231	0.235671	1393	3	0.17371
CHTF8	4	0.98718	0.99239	1	18532	0	0.19416	0.021119	0.017231	0.235671	1394	3	0.19416
GARNL3	4	0.57997	0.5739	1	10744	1	0.18887	0.021127	0.017231	0.235671	1395	3	0.18887
HRASLS5	4	0.6836	0.6708	1	12313	1	0.21832	0.021135	0.017231	0.235671	1396	2	0.21832
COL9A2	4	0.26197	0.33933	0.913698	6991	1	0.071643	0.021156	0.017231	0.235671	1397	2	0.071643
CARD16	4	0.7791	0.78033	1	14091	0	0.26763	0.02126	0.017397	0.237599	1398	3	0.26763
SLC22A12	4	0.80689	0.81561	1	14635	0	0.20882	0.021275	0.017397	0.237599	1399	3	0.20882
IL6ST	4	0.39386	0.43435	0.96036	8577	1	0.18109	0.021323	0.017582	0.239114	1400	3	0.18109
HSF2	4	0.73748	0.73722	1	13319	0	0.18673	0.02134	0.017582	0.239114	1401	3	0.18673
EML5	4	0.98483	0.99051	1	18473	0	0.22764	0.021362	0.017582	0.239114	1402	3	0.22764
TMEM109	4	0.96701	0.97865	1	18016	0	0.086774	0.021416	0.017583	0.239114	1403	2	0.086774
SDC1	4	0.25406	0.33186	0.913698	6814	2	-0.0020994	0.021468	0.017583	0.239114	1404	2	-0.0020994
MFNG	4	0.66615	0.65595	1	12045	1	0.11969	0.021551	0.017765	0.240379	1405	2	0.11969
OR5P3	4	0.65769	0.64779	1	11908	1	0.19602	0.021569	0.017765	0.240379	1406	2	0.19602
PSMD9	4	0.47276	0.48999	0.992822	9391	1	0.15063	0.02161	0.017765	0.240379	1407	3	0.15063
ANKRD39	4	0.76656	0.76532	1	13866	0	0.19785	0.021621	0.017765	0.240379	1408	2	0.19785
GOLGA2	4	0.88765	0.90281	1	16213	0	0.2176	0.02163	0.017765	0.240379	1409	2	0.2176
PRDM10	4	0.86904	0.88821	1	15850	0	0.26008	0.021639	0.017766	0.240379	1410	3	0.26008
C11orf95	4	0.95889	0.97147	1	17824	0	0.16798	0.021717	0.017766	0.240379	1411	2	0.16798
HEATR3	4	0.8989	0.91186	1	16432	0	0.30321	0.021735	0.018015	0.240379	1412	3	0.30321
MARS2	4	0.54175	0.54769	1	10220	1	0.33879	0.021778	0.018015	0.240379	1413	3	0.33879
FUT7	4	0.80896	0.81797	1	14671	0	0.18981	0.021814	0.018015	0.240379	1414	2	0.18981
ERAP1	4	0.58286	0.57715	1	10788	1	0.10869	0.021822	0.018015	0.240379	1415	2	0.10869
TPPP	4	0.76645	0.76532	1	13863	0	0.1349	0.021936	0.018015	0.240379	1416	2	0.1349
PCYT1B	4	0.92508	0.93915	1	17000	0	0.24461	0.021961	0.018015	0.240379	1417	3	0.24461
RRAGA	4	0.98643	0.99158	1	18512	0	0.1483	0.021963	0.018015	0.240379	1418	3	0.1483
SECTM1	4	0.29031	0.37495	0.935126	7538	1	0.030496	0.021988	0.018016	0.240379	1419	1	0.030496
TREH	4	0.93451	0.94913	1	17234	0	0.30385	0.02201	0.018016	0.240379	1420	3	0.30385
UQCRH	3	0.44609	0.43905	0.964854	9094	1	0.15215	0.022015	0.018952	0.249568	1421	2	0.15215
CXorf23	4	0.86643	0.88659	1	15794	0	0.21861	0.022042	0.018016	0.240379	1422	3	0.21861
C9orf57	4	0.31203	0.39648	0.953126	7831	1	0.15395	0.022092	0.018016	0.240379	1423	2	0.15395
ASF1A	4	0.69843	0.68874	1	12550	1	0.27364	0.022094	0.018016	0.240379	1424	3	0.27364
ZNF14	4	0.8126	0.82143	1	14749	0	0.19308	0.022104	0.018016	0.240379	1425	2	0.19308
SRY	4	0.92459	0.93915	1	16984	0	0.18707	0.022126	0.018016	0.240379	1426	3	0.18707
RIMS4	4	0.7368	0.73722	1	13304	0	0.16234	0.022144	0.018016	0.240379	1427	2	0.16234
C19orf26	4	0.77422	0.77633	1	13993	0	0.16505	0.022157	0.018016	0.240379	1428	3	0.16505
GIPC1	4	0.17979	0.23785	0.846046	5328	1	0.25197	0.022166	0.018016	0.240379	1429	3	0.25197
ZNF185	4	0.56743	0.569	1	10562	1	0.21496	0.022192	0.018016	0.240379	1430	2	0.21496
HOXD3	4	0.85534	0.86936	1	15557	0	0.12982	0.022196	0.018016	0.240379	1431	2	0.12982
KLC3	4	0.79361	0.80227	1	14366	0	0.20676	0.022218	0.018201	0.242178	1432	2	0.20676
PTGER1	4	0.95249	0.96524	1	17655	0	0.11754	0.02228	0.018201	0.242178	1433	2	0.11754
SMCP	4	0.29164	0.37667	0.935126	7568	1	0.1159	0.022289	0.018201	0.242178	1434	2	0.1159
FAM47C	4	0.5749	0.57226	1	10666	1	0.13397	0.0223	0.018201	0.242178	1435	2	0.13397
CLEC4G	3	0.97755	0.98793	1	18289	0	0.19057	0.022449	0.019398	0.253515	1436	3	0.19057
LGALS1	4	0.54128	0.54769	1	10212	1	0.07682	0.022456	0.018383	0.244258	1437	2	0.07682
B3GNT8	4	0.11976	0.16291	0.755138	4097	1	0.22021	0.022457	0.018383	0.244258	1438	3	0.22021
LYG1	4	0.14513	0.19119	0.786805	4618	2	-0.080179	0.022508	0.018563	0.245806	1439	1	-0.080179
INSM1	4	0.94775	0.96246	1	17548	0	0.26664	0.022537	0.018564	0.245806	1440	3	0.26664
GID8	4	0.90865	0.92171	1	16655	0	0.18823	0.02256	0.018564	0.245806	1441	3	0.18823
SYT1	4	0.47284	0.48999	0.992822	9393	1	0.21865	0.022564	0.018564	0.245806	1442	3	0.21865
IL20RB	4	0.18052	0.23886	0.846046	5342	2	0.077473	0.022582	0.018564	0.245806	1443	2	0.077473
CHST10	4	0.56816	0.569	1	10567	1	0.022067	0.022664	0.018743	0.246982	1444	2	0.022067
PDIA2	4	0.93999	0.95555	1	17373	0	0.14026	0.022671	0.018743	0.246982	1445	2	0.14026
OR5D13	4	0.76574	0.76247	1	13847	0	0.23037	0.022672	0.018743	0.246982	1446	3	0.23037
CD3D	4	0.52529	0.53777	1	9995	1	0.2636	0.022706	0.018743	0.246982	1447	3	0.2636
APBA1	4	0.61914	0.61492	1	11291	1	0.10587	0.022768	0.018743	0.246982	1448	2	0.10587
TP53TG3	4	0.084719	0.11766	0.66162	3376	1	0.14669	0.022778	0.018743	0.246982	1449	2	0.14669
OR4D10	4	0.97633	0.98505	1	18254	0	0.28552	0.022783	0.018743	0.246982	1450	3	0.28552
CPA2	4	0.33703	0.41117	0.958075	8041	1	0.21891	0.02282	0.019013	0.24985	1451	3	0.21891
CEP70	3	0.97717	0.98758	1	18276	0	0.22597	0.022827	0.02061	0.257384	1452	3	0.22597
LOC100129216	3	0.89601	0.91858	1	16368	0	0.23944	0.022856	0.02061	0.257384	1453	2	0.23944
SLC25A1	3	0.97713	0.98758	1	18275	0	0.25373	0.022871	0.02061	0.257384	1454	3	0.25373
F8	4	0.8967	0.90846	1	16386	0	0.12621	0.022872	0.019013	0.24985	1455	3	0.12621
PRKACB	4	0.88478	0.90208	1	16145	0	0.23133	0.022894	0.019013	0.24985	1456	2	0.23133
CCDC93	4	0.82558	0.83787	1	15008	0	-0.0012026	0.022924	0.019276	0.252103	1457	1	-0.0012026
PARVB	4	0.88832	0.90281	1	16230	0	0.2052	0.02293	0.019276	0.252103	1458	3	0.2052
MRPL12	4	0.53821	0.54438	1	10172	1	0.28627	0.022968	0.019276	0.252103	1459	3	0.28627
CD72	4	0.59246	0.58373	1	10927	1	0.16921	0.022968	0.019276	0.252103	1460	3	0.16921
USP22	4	0.87333	0.88983	1	15937	0	0.17242	0.023038	0.019277	0.252103	1461	2	0.17242
LARS2	4	0.61077	0.60679	1	11181	1	0.28725	0.023048	0.019277	0.252103	1462	3	0.28725
ZNF100	3	0.74345	0.75861	1	13423	0	0.34284	0.023058	0.020772	0.258312	1463	2	0.34284
SLC22A8	4	0.26037	0.33933	0.913698	6960	1	0.19328	0.023061	0.019277	0.252103	1464	3	0.19328
ZNF74	4	0.081698	0.11512	0.660629	3301	1	0.2131	0.023074	0.019462	0.253559	1465	3	0.2131
TMEM14B	4	0.93315	0.94784	1	17197	0	0.14238	0.023121	0.019746	0.253559	1466	3	0.14238
CSRP2	4	0.97645	0.98506	1	18259	0	0.18986	0.023158	0.019746	0.253559	1467	3	0.18986
TCN2	4	0.30525	0.38987	0.945944	7776	1	0.25027	0.023162	0.019746	0.253559	1468	3	0.25027
ERI2	4	0.73159	0.72795	1	13202	0	0.29659	0.023218	0.019746	0.253559	1469	3	0.29659
MUSTN1	4	0.87752	0.89455	1	16011	0	0.20297	0.023281	0.019747	0.253559	1470	2	0.20297
FCHSD1	4	0.91355	0.92933	1	16757	0	0.17737	0.023287	0.019747	0.253559	1471	2	0.17737
PLEKHM3	4	0.86208	0.87907	1	15699	0	0.18679	0.023296	0.019747	0.253559	1472	3	0.18679
OPTC	4	0.15287	0.2049	0.81752	4768	2	-0.12478	0.023339	0.019747	0.253559	1473	1	-0.12478
ESAM	4	0.91602	0.93045	1	16803	0	0.11135	0.023353	0.019747	0.253559	1474	2	0.11135
GSTP1	4	0.93226	0.94741	1	17173	0	0.13666	0.023372	0.01984	0.253559	1475	3	0.13666
DCUN1D5	4	0.98687	0.99204	1	18523	0	0.24442	0.023379	0.019934	0.253559	1476	3	0.24442
FNDC9	4	0.83017	0.84207	1	15089	0	0.039824	0.023391	0.019934	0.253559	1477	1	0.039824
STMN3	4	0.61771	0.61492	1	11269	1	0.21168	0.02342	0.019934	0.253559	1478	3	0.21168
SLC23A2	4	0.61154	0.60679	1	11191	1	0.1727	0.02348	0.019934	0.253559	1479	2	0.1727
SCN11A	4	0.43175	0.45733	0.970055	8948	1	0.091699	0.023495	0.019934	0.253559	1480	2	0.091699
DNAJB6	4	0.58231	0.57715	1	10782	1	0.20887	0.023534	0.019934	0.253559	1481	3	0.20887
PIK3CB	4	0.29017	0.37495	0.935126	7535	1	-0.048608	0.023547	0.019934	0.253559	1482	1	-0.048608
TM2D2	4	0.98707	0.99238	1	18528	0	0.35767	0.023561	0.019934	0.253559	1483	3	0.35767
WDR37	4	0.87514	0.89064	1	15969	0	0.21466	0.023648	0.019934	0.253559	1484	3	0.21466
CTSF	4	0.77278	0.77492	1	13975	0	0.11631	0.023651	0.019934	0.253559	1485	2	0.11631
HIST1H3C	4	0.64009	0.63613	1	11616	1	0.26562	0.023657	0.019934	0.253559	1486	3	0.26562
LRRFIP2	4	0.97738	0.98575	1	18284	0	0.22364	0.02369	0.019934	0.253559	1487	3	0.22364
ZBTB34	4	0.94135	0.95636	1	17409	0	0.03683	0.023703	0.019934	0.253559	1488	1	0.03683
ZFX	3	0.97625	0.98635	1	18252	0	0.12824	0.023755	0.022033	0.261963	1489	3	0.12824
NINJ1	4	0.81726	0.82815	1	14835	0	0.15528	0.023761	0.019934	0.253559	1490	2	0.15528
LRCOL1	4	0.48585	0.50317	0.998341	9537	1	0.1214	0.023806	0.019934	0.253559	1491	2	0.1214
UBE2A	3	0.20564	0.26068	0.872471	5846	1	0.29325	0.023807	0.022309	0.262785	1492	2	0.29325
CHAMP1	4	0.62206	0.61657	1	11347	1	0.19249	0.023839	0.019934	0.253559	1493	3	0.19249
PTBP3	4	0.88597	0.90281	1	16177	0	0.16631	0.023871	0.019934	0.253559	1494	3	0.16631
C11orf52	4	0.9389	0.9539	1	17343	0	0.14843	0.02389	0.020131	0.253559	1495	3	0.14843
C5orf34	4	0.84756	0.86565	1	15420	0	0.24757	0.023953	0.020131	0.253559	1496	3	0.24757
PALM2-AKAP2	4	0.98095	0.98814	1	18380	0	0.20704	0.023962	0.020131	0.253559	1497	3	0.20704
SMARCA2	4	0.53361	0.54111	1	10113	1	0.094426	0.024008	0.020131	0.253559	1498	2	0.094426
TOR2A	4	0.31513	0.39812	0.953126	7859	1	0.14142	0.024012	0.020131	0.253559	1499	3	0.14142
FAM83D	4	0.77579	0.77769	1	14023	0	0.063902	0.024014	0.020131	0.253559	1500	2	0.063902
ICAM5	4	0.36821	0.426	0.96036	8321	1	0.14677	0.024026	0.020131	0.253559	1501	3	0.14677
CCNI2	4	0.82874	0.84102	1	15065	0	0.13179	0.024035	0.020131	0.253559	1502	2	0.13179
PELO	4	0.89843	0.91116	1	16422	0	0.27818	0.02404	0.020131	0.253559	1503	3	0.27818
JADE3	4	0.98692	0.99228	1	18526	0	0.16192	0.024047	0.020131	0.253559	1504	3	0.16192
GTF3C5	4	0.2828	0.36917	0.934789	7391	2	0.067077	0.024066	0.020131	0.253559	1505	2	0.067077
SMC3	3	0.88509	0.91013	1	16156	0	0.3928	0.024079	0.02231	0.262785	1506	2	0.3928
C6orf226	4	0.87116	0.88983	1	15895	0	0.19889	0.02412	0.020131	0.253559	1507	3	0.19889
DIRAS1	4	0.98135	0.98875	1	18387	0	0.22979	0.024145	0.020131	0.253559	1508	2	0.22979
OR52M1	4	0.042602	0.057521	0.503912	2161	2	0.036102	0.024163	0.020131	0.253559	1509	2	0.036102
IRX4	4	0.51802	0.53286	1	9914	1	-0.041398	0.02417	0.020131	0.253559	1510	1	-0.041398
CATSPER4	4	0.049502	0.068394	0.536568	2400	1	0.21898	0.024222	0.020131	0.253559	1511	3	0.21898
TET2	4	0.72227	0.71511	1	13028	0	0.16572	0.024232	0.020131	0.253559	1512	2	0.16572
TPP2	4	0.60199	0.59695	1	11062	1	-0.049522	0.024273	0.020131	0.253559	1513	1	-0.049522
CCDC124	4	0.75497	0.75668	1	13649	0	0.24412	0.024274	0.020131	0.253559	1514	3	0.24412
B4GALT7	4	0.86228	0.87907	1	15706	0	0.22352	0.024281	0.020131	0.253559	1515	3	0.22352
SLC22A7	3	0.97572	0.98579	1	18238	0	0.16666	0.024283	0.023124	0.270567	1516	3	0.16666
OR7D4	4	0.96139	0.97389	1	17881	0	0.22326	0.024301	0.020131	0.253559	1517	2	0.22326
ANO4	4	0.97644	0.98506	1	18258	0	0.2243	0.024319	0.020131	0.253559	1518	3	0.2243
PACSIN3	4	0.14823	0.1955	0.792072	4682	1	0.18308	0.024347	0.020131	0.253559	1519	2	0.18308
SPATA31C1	3	0.93171	0.94986	1	17159	0	0.37373	0.024359	0.023124	0.270567	1520	2	0.37373
CHRM1	4	0.96417	0.97594	1	17948	0	0.19629	0.024409	0.020131	0.253559	1521	3	0.19629
AKIRIN2	3	0.62476	0.62029	1	11390	0	0.38028	0.024413	0.023124	0.270567	1522	2	0.38028
MLC1	4	0.032823	0.042257	0.442422	1788	3	-0.25847	0.024429	0.020131	0.253559	1523	1	-0.25847
PCDHB10	4	0.98467	0.99051	1	18469	0	0.19594	0.024432	0.020131	0.253559	1524	3	0.19594
TGFBI	4	0.9058	0.91853	1	16600	0	0.17537	0.024439	0.020131	0.253559	1525	3	0.17537
RAB9B	3	0.27393	0.30449	0.904609	7218	1	0.35248	0.024447	0.023307	0.270712	1526	2	0.35248
LRG1	4	0.72597	0.72	1	13098	0	0.26894	0.024508	0.020326	0.255507	1527	3	0.26894
LOC388282	4	0.90039	0.9146	1	16468	0	0.27998	0.024523	0.020326	0.255507	1528	3	0.27998
BCAR1	3	0.97547	0.9856	1	18230	0	0.16943	0.024526	0.023307	0.270712	1529	3	0.16943
GLUD2	4	0.73654	0.73722	1	13300	0	0.21138	0.024565	0.020326	0.255507	1530	3	0.21138
NDFIP1	4	0.9071	0.91982	1	16622	0	0.15034	0.024585	0.020529	0.256884	1531	2	0.15034
MMP10	4	0.82536	0.83787	1	15002	0	0.20113	0.024604	0.020529	0.256884	1532	3	0.20113
LHX4	4	0.89883	0.91186	1	16430	0	0.19675	0.024615	0.020529	0.256884	1533	2	0.19675
ARL6IP1	4	0.73607	0.7357	1	13289	0	0.063032	0.024637	0.020529	0.256884	1534	2	0.063032
PTER	4	0.93454	0.94913	1	17237	0	0.14123	0.024718	0.020529	0.256884	1535	3	0.14123
IGFL2	4	0.29952	0.38663	0.94429	7725	1	0.011594	0.024792	0.02053	0.256884	1536	2	0.011594
ZNF439	4	0.90836	0.92171	1	16652	0	0.23703	0.024852	0.02053	0.256884	1537	3	0.23703
GLB1	4	0.91173	0.92589	1	16721	0	0.21838	0.024896	0.020725	0.258312	1538	3	0.21838
AMPD3	4	0.96466	0.97594	1	17960	0	0.20638	0.024948	0.020927	0.258312	1539	3	0.20638
RBM19	4	0.96086	0.97362	1	17861	0	0.27293	0.025024	0.020927	0.258312	1540	3	0.27293
ZNF266	4	0.084472	0.11766	0.66162	3367	1	0.22227	0.025049	0.020927	0.258312	1541	3	0.22227
F8A2	4	0.60049	0.59531	1	11038	1	0.27164	0.025051	0.020927	0.258312	1542	3	0.27164
TMED7-TICAM2	4	0.20993	0.27671	0.886505	5929	1	0.073231	0.025052	0.020927	0.258312	1543	2	0.073231
ARMC12	4	0.9525	0.96524	1	17656	0	0.15028	0.02507	0.020927	0.258312	1544	2	0.15028
CCDC94	4	0.83588	0.84824	1	15195	0	0.26685	0.025103	0.020927	0.258312	1545	3	0.26685
IL18BP	4	0.65405	0.64611	1	11845	1	0.17906	0.025112	0.020927	0.258312	1546	3	0.17906
UAP1	4	0.84404	0.85992	1	15361	0	0.16467	0.025117	0.020927	0.258312	1547	2	0.16467
ZSWIM3	4	0.84452	0.86089	1	15366	0	0.21545	0.025132	0.020927	0.258312	1548	3	0.21545
REEP2	4	0.35292	0.41608	0.958075	8191	1	0.12307	0.025168	0.020928	0.258312	1549	2	0.12307
SLC35A3	4	0.30058	0.38827	0.944466	7733	1	0.088514	0.025207	0.020928	0.258312	1550	2	0.088514
KIZ	4	0.78085	0.783	1	14134	0	0.29831	0.025236	0.020928	0.258312	1551	3	0.29831
ZNF334	4	0.83225	0.84416	1	15128	0	0.14151	0.025238	0.020928	0.258312	1552	2	0.14151
MPV17	4	0.71996	0.71351	1	12982	0	-0.025445	0.025259	0.020928	0.258312	1553	1	-0.025445
LY6G6D	4	0.34653	0.41443	0.958075	8133	1	0.19859	0.025311	0.020928	0.258312	1554	2	0.19859
GSX1	4	0.3028	0.38828	0.944466	7756	1	0.33052	0.025379	0.021345	0.260123	1555	2	0.33052
ZNF441	4	0.48147	0.49991	0.998341	9484	1	0.1972	0.025398	0.021345	0.260123	1556	3	0.1972
CNTN6	4	0.92007	0.93551	1	16893	0	0.23295	0.02541	0.021345	0.260123	1557	3	0.23295
ACRV1	4	0.29396	0.37939	0.935126	7625	1	-0.048894	0.025414	0.021345	0.260123	1558	1	-0.048894
C5orf24	4	0.89854	0.91116	1	16423	0	0.26365	0.025447	0.021345	0.260123	1559	3	0.26365
ANAPC2	3	0.97454	0.98466	1	18201	0	0.23978	0.025458	0.024485	0.279625	1560	3	0.23978
BATF3	4	0.084696	0.11766	0.66162	3374	2	-0.10711	0.025466	0.021345	0.260123	1561	1	-0.10711
HDAC2	4	0.91792	0.93384	1	16844	0	0.32769	0.025476	0.021345	0.260123	1562	3	0.32769
MRPS27	4	0.94816	0.96319	1	17561	0	0.30121	0.02551	0.021346	0.260123	1563	3	0.30121
TIRAP	4	0.96921	0.98024	1	18065	0	0.11464	0.02552	0.021346	0.260123	1564	3	0.11464
AFAP1	4	0.52509	0.53777	1	9992	1	0.26763	0.025525	0.021346	0.260123	1565	3	0.26763
AHDC1	4	0.84977	0.86661	1	15462	0	0.18163	0.025557	0.021346	0.260123	1566	2	0.18163
TCP11L2	4	0.93452	0.94913	1	17235	0	0.18263	0.025598	0.021346	0.260123	1567	3	0.18263
EFNA2	4	0.8814	0.89918	1	16081	0	0.1142	0.025614	0.021346	0.260123	1568	2	0.1142
SLA2	4	0.21492	0.2857	0.901553	6022	1	0.12274	0.025622	0.021579	0.260123	1569	2	0.12274
ARSB	4	0.98636	0.99148	1	18508	0	0.17156	0.025666	0.021579	0.260123	1570	3	0.17156
TMEM45A	4	0.95766	0.97028	1	17793	0	0.21764	0.025686	0.021579	0.260123	1571	3	0.21764
PAMR1	4	0.81695	0.82815	1	14831	0	0.080167	0.025725	0.021579	0.260123	1572	2	0.080167
AMICA1	4	0.85455	0.86936	1	15541	0	0.13894	0.025774	0.021579	0.260123	1573	2	0.13894
NOTCH2NL	3	0.21879	0.2674	0.881365	6109	1	-0.089959	0.025799	0.025375	0.28638	1574	1	-0.089959
PAX6	4	0.98789	0.99319	1	18559	0	0.23791	0.025809	0.021579	0.260123	1575	3	0.23791
C12orf77	2	0.93588	0.95775	1	17268	0	0.34803	0.025874	0.016616	0.233785	1576	2	0.34803
CLEC18C	4	0.67282	0.6626	1	12153	1	0.32807	0.025881	0.021864	0.260123	1577	3	0.32807
C2orf74	4	0.8905	0.90281	1	16263	0	0.2163	0.025897	0.021864	0.260123	1578	3	0.2163
FRMPD1	4	0.14471	0.19119	0.786805	4605	1	0.1608	0.025912	0.021864	0.260123	1579	3	0.1608
R3HCC1L	4	0.51683	0.53286	1	9906	1	0.13762	0.026036	0.021864	0.260123	1580	3	0.13762
ZNF283	4	0.62143	0.61657	1	11329	1	0.29947	0.026043	0.021864	0.260123	1581	3	0.29947
RAB6A	4	0.26855	0.35077	0.922211	7120	1	0.12135	0.026058	0.021864	0.260123	1582	2	0.12135
HMOX1	4	0.41348	0.44747	0.965782	8764	1	0.11813	0.026094	0.021864	0.260123	1583	3	0.11813
DNAJC25	4	0.4332	0.45733	0.970055	8964	1	0.021551	0.02614	0.021864	0.260123	1584	1	0.021551
CPSF1	4	0.95582	0.96819	1	17747	0	0.26649	0.026159	0.021864	0.260123	1585	3	0.26649
LRCH2	4	0.53614	0.54438	1	10145	1	0.28012	0.026179	0.021864	0.260123	1586	3	0.28012
HNRNPA0	4	0.66009	0.64779	1	11943	1	0.081806	0.026192	0.021864	0.260123	1587	1	0.081806
KIAA1191	4	0.91587	0.9299	1	16800	0	0.1685	0.026193	0.021864	0.260123	1588	3	0.1685
EZH2	4	0.53667	0.54438	1	10155	1	0.25702	0.026218	0.021864	0.260123	1589	3	0.25702
PSMD10	4	0.00092461	0.00092729	0.093745	182	1	0.14557	0.026248	0.021864	0.260123	1590	2	0.14557
ZACN	4	0.92651	0.94017	1	17032	0	0.13826	0.026258	0.021864	0.260123	1591	3	0.13826
PZP	4	0.89207	0.90567	1	16300	0	0.046106	0.026295	0.021864	0.260123	1592	1	0.046106
SNCB	4	0.9245	0.93915	1	16981	0	0.13849	0.026342	0.021864	0.260123	1593	3	0.13849
LYSMD3	4	0.45909	0.48178	0.99071	9237	1	0.1569	0.026347	0.021864	0.260123	1594	3	0.1569
EI24	4	0.97781	0.9859	1	18299	0	0.30812	0.026353	0.021864	0.260123	1595	2	0.30812
FKBP8	4	0.80578	0.81322	1	14616	0	0.12111	0.026363	0.021864	0.260123	1596	2	0.12111
XKRY	3	0.51271	0.50612	1	9855	1	0.11508	0.026383	0.026427	0.292506	1597	2	0.11508
TIPRL	4	0.4458	0.47199	0.97887	9090	1	0.017857	0.026399	0.021864	0.260123	1598	1	0.017857
DTX4	4	0.85534	0.86936	1	15558	0	0.22697	0.026427	0.021864	0.260123	1599	3	0.22697
FBXO4	4	0.81603	0.82705	1	14811	0	0.24482	0.02643	0.021864	0.260123	1600	2	0.24482
GYG2	4	0.73001	0.72483	1	13174	0	0.079036	0.026451	0.021864	0.260123	1601	2	0.079036
GRIN3B	4	0.74541	0.74179	1	13457	0	0.21208	0.026487	0.021864	0.260123	1602	3	0.21208
CMYA5	4	0.89715	0.90916	1	16390	0	0.18893	0.026507	0.021864	0.260123	1603	3	0.18893
SLC17A7	4	0.79319	0.80227	1	14355	0	0.12411	0.026525	0.021864	0.260123	1604	2	0.12411
OBP2B	4	0.81084	0.81797	1	14711	0	0.11995	0.026535	0.021864	0.260123	1605	2	0.11995
C20orf194	4	0.56697	0.569	1	10556	1	0.27367	0.026552	0.021864	0.260123	1606	3	0.27367
HOGA1	4	0.2588	0.33933	0.913698	6921	1	-0.067489	0.026555	0.021864	0.260123	1607	1	-0.067489
NDUFA7	4	0.97005	0.98045	1	18088	0	0.20943	0.026567	0.021864	0.260123	1608	3	0.20943
TLR8	4	0.97555	0.98432	1	18234	0	0.28653	0.026577	0.021864	0.260123	1609	3	0.28653
FBXO8	4	0.95279	0.96624	1	17660	0	0.14544	0.026583	0.021864	0.260123	1610	2	0.14544
ECT2L	4	0.73916	0.73722	1	13347	0	0.1835	0.026602	0.021864	0.260123	1611	2	0.1835
UBXN10	3	0.97339	0.98323	1	18174	0	0.20075	0.026608	0.026427	0.292506	1612	3	0.20075
PCDHGA5	4	0.53375	0.54275	1	10115	1	0.16915	0.02664	0.021864	0.260123	1613	2	0.16915
TRAPPC6A	4	0.44628	0.47199	0.97887	9097	1	0.17693	0.026672	0.021864	0.260123	1614	3	0.17693
FBXO9	4	0.59134	0.58373	1	10918	1	0.17666	0.026678	0.021864	0.260123	1615	2	0.17666
TREM2	4	0.6206	0.61492	1	11314	1	0.14386	0.026688	0.021864	0.260123	1616	2	0.14386
EDEM2	4	0.95592	0.96819	1	17750	0	0.2421	0.026752	0.022107	0.262681	1617	3	0.2421
TAF9	4	0.93469	0.94913	1	17241	0	0.10645	0.026865	0.022321	0.262785	1618	2	0.10645
HPD	4	0.92562	0.93967	1	17006	0	0.25055	0.026928	0.022321	0.262785	1619	3	0.25055
STUB1	4	0.021458	0.027037	0.385227	1329	3	-0.2206	0.026969	0.022321	0.262785	1620	1	-0.2206
KRTAP19-1	4	0.87355	0.89064	1	15941	0	0.19837	0.027015	0.022322	0.262785	1621	2	0.19837
PCNT	4	0.15645	0.21017	0.822403	4849	1	0.12393	0.027021	0.022322	0.262785	1622	3	0.12393
ANAPC7	4	0.88859	0.90281	1	16236	0	0.12912	0.027034	0.022322	0.262785	1623	2	0.12912
NDUFC2	4	0.5533	0.55908	1	10372	1	0.23224	0.02705	0.022322	0.262785	1624	3	0.23224
GTF2H3	4	0.90306	0.91725	1	16529	0	0.19927	0.027054	0.022322	0.262785	1625	2	0.19927
CD74	4	0.75765	0.75668	1	13701	0	0.20392	0.02712	0.022322	0.262785	1626	3	0.20392
ANO5	4	0.94421	0.9595	1	17466	0	0.12063	0.027121	0.022322	0.262785	1627	3	0.12063
PTRHD1	4	0.93261	0.94741	1	17184	0	0.21454	0.027124	0.022322	0.262785	1628	3	0.21454
NDUFS7	4	0.80795	0.81681	1	14654	0	0.22901	0.027131	0.022322	0.262785	1629	3	0.22901
WDR3	4	0.69556	0.68377	1	12494	1	0.24854	0.027141	0.022322	0.262785	1630	3	0.24854
CDK2AP1	4	0.95709	0.96969	1	17782	0	0.17608	0.027252	0.022768	0.267056	1631	3	0.17608
SGSM1	4	0.9154	0.92933	1	16792	0	0.2206	0.027268	0.022768	0.267056	1632	3	0.2206
CST7	4	0.078422	0.11452	0.660629	3238	1	0.2161	0.027276	0.022768	0.267056	1633	3	0.2161
MYO1B	4	0.75999	0.75816	1	13735	0	0.15164	0.027295	0.022768	0.267056	1634	2	0.15164
PSMC1	3	0.97269	0.98261	1	18155	0	0.18472	0.027305	0.027302	0.294063	1635	3	0.18472
HSPB2	4	0.25297	0.32931	0.913698	6796	2	-0.12571	0.027331	0.022768	0.267056	1636	1	-0.12571
STARD6	4	0.95138	0.96488	1	17628	0	0.17202	0.027339	0.022768	0.267056	1637	3	0.17202
TMEM259	4	0.64215	0.63613	1	11654	1	-0.0098912	0.027383	0.023052	0.270215	1638	1	-0.0098912
ODF2	4	0.78265	0.78435	1	14161	0	0.18478	0.027436	0.023292	0.270712	1639	3	0.18478
RRAS2	4	0.48604	0.50317	0.998341	9539	1	0.17794	0.027456	0.023292	0.270712	1640	3	0.17794
PPFIA3	4	0.86525	0.88659	1	15765	0	0.25454	0.02747	0.023292	0.270712	1641	2	0.25454
TUBA8	4	0.861	0.87732	1	15678	0	0.16978	0.027487	0.023292	0.270712	1642	2	0.16978
TNK2	4	0.77032	0.7736	1	13922	0	0.20136	0.027497	0.023292	0.270712	1643	3	0.20136
ARFGAP1	4	0.70183	0.69708	1	12617	1	0.096875	0.027538	0.023292	0.270712	1644	1	0.096875
UBE2V1	4	0.98755	0.99291	1	18547	0	0.19385	0.027548	0.023292	0.270712	1645	2	0.19385
TTC22	4	0.57804	0.57226	1	10717	1	0.10893	0.027642	0.023292	0.270712	1646	2	0.10893
OR52E4	4	0.63294	0.62958	1	11508	1	0.082145	0.027694	0.023292	0.270712	1647	2	0.082145
SLIT3	4	0.98907	0.99377	1	18594	0	0.21745	0.027702	0.023292	0.270712	1648	3	0.21745
ITPR3	4	0.76133	0.75961	1	13759	0	0.16172	0.027743	0.023579	0.273546	1649	2	0.16172
EVX1	4	0.44706	0.47199	0.97887	9107	1	0.19487	0.027753	0.023579	0.273546	1650	2	0.19487
POU5F2	4	0.69423	0.68377	1	12473	1	-0.037276	0.027797	0.023895	0.277038	1651	1	-0.037276
SUV39H2	4	0.63681	0.63285	1	11572	1	0.18268	0.02781	0.024208	0.279625	1652	3	0.18268
NDUFA12	3	0.97215	0.98216	1	18138	0	0.22348	0.02785	0.02772	0.294623	1653	3	0.22348
ANKRD17	3	0.65832	0.65715	1	11918	0	-0.0031434	0.027862	0.02772	0.294623	1654	1	-0.0031434
PANX3	4	0.87421	0.89064	1	15956	0	0.20497	0.027874	0.024208	0.279625	1655	3	0.20497
PCDHA4	4	0.10512	0.14233	0.713291	3787	2	0.0774	0.027899	0.024448	0.279625	1656	2	0.0774
FAM212B	4	0.73773	0.73722	1	13323	0	0.050664	0.027901	0.024448	0.279625	1657	2	0.050664
UNC45A	4	0.87617	0.89375	1	15987	0	0.17295	0.027952	0.024448	0.279625	1658	3	0.17295
CCDC9	4	0.93691	0.95131	1	17295	0	0.28413	0.027974	0.024448	0.279625	1659	3	0.28413
CLEC16A	4	0.9836	0.98959	1	18443	0	0.11473	0.028047	0.024448	0.279625	1660	3	0.11473
F2R	3	0.97194	0.98193	1	18134	0	0.1332	0.028063	0.027937	0.296219	1661	3	0.1332
TBCB	4	0.72806	0.72163	1	13144	0	0.30282	0.028104	0.024448	0.279625	1662	3	0.30282
HNRNPA3	4	0.92955	0.9436	1	17106	0	0.037616	0.028108	0.024448	0.279625	1663	1	0.037616
GPR148	4	0.96317	0.97518	1	17928	0	0.17425	0.028154	0.024688	0.279625	1664	2	0.17425
CNIH2	4	0.97023	0.98045	1	18094	0	0.10234	0.028159	0.024688	0.279625	1665	3	0.10234
DYNC2H1	4	0.97555	0.98432	1	18233	0	0.1374	0.028176	0.024688	0.279625	1666	3	0.1374
RGS4	4	0.70741	0.69872	1	12729	1	0.17202	0.028211	0.024688	0.279625	1667	3	0.17202
MAD1L1	4	0.32766	0.40461	0.957614	7959	1	0.20717	0.028213	0.024688	0.279625	1668	2	0.20717
DSCAM	4	0.90429	0.91725	1	16561	0	0.15663	0.028218	0.024688	0.279625	1669	3	0.15663
MPZL3	4	0.2	0.2659	0.877032	5738	2	0.062806	0.028252	0.024688	0.279625	1670	2	0.062806
BDP1	4	0.87214	0.88983	1	15913	0	0.17024	0.028254	0.024688	0.279625	1671	3	0.17024
CGB2	4	0.85813	0.87297	1	15617	0	0.099681	0.028263	0.024688	0.279625	1672	2	0.099681
ZNF385D	4	0.76796	0.77084	1	13883	0	0.17388	0.028272	0.024688	0.279625	1673	2	0.17388
SULT1A3	3	0.97172	0.98172	1	18129	0	0.19853	0.028276	0.028144	0.297849	1674	3	0.19853
DEFB110	4	0.74639	0.74332	1	13480	0	0.21285	0.028285	0.024688	0.279625	1675	3	0.21285
PABPC1L	4	0.67794	0.66586	1	12228	1	0.10879	0.028316	0.024688	0.279625	1676	2	0.10879
MICALCL	4	0.92488	0.93915	1	16992	0	0.21425	0.028316	0.024688	0.279625	1677	2	0.21425
ACTN3	4	0.79422	0.80227	1	14378	0	0.076161	0.028366	0.024688	0.279625	1678	2	0.076161
SPOPL	4	0.46645	0.48506	0.99071	9315	1	0.15202	0.0284	0.024688	0.279625	1679	3	0.15202
NHP2	4	0.91878	0.93384	1	16863	0	0.043466	0.028418	0.024688	0.279625	1680	1	0.043466
CRYBA4	4	0.9767	0.98506	1	18267	0	0.21133	0.02842	0.024688	0.279625	1681	2	0.21133
RRP36	4	0.80554	0.81322	1	14612	0	0.19104	0.028459	0.024688	0.279625	1682	2	0.19104
RAG2	4	0.53512	0.54438	1	10137	1	0.11206	0.028489	0.024688	0.279625	1683	2	0.11206
C3	4	0.94449	0.96028	1	17472	0	0.099104	0.028521	0.024689	0.279625	1684	2	0.099104
OVCH2	4	0.59125	0.58373	1	10916	1	0.20207	0.028588	0.024689	0.279625	1685	3	0.20207
SLC15A5	3	0.33891	0.34127	0.918283	8066	1	0.50078	0.028601	0.028471	0.297849	1686	2	0.50078
RILPL2	4	0.97385	0.9828	1	18186	0	0.21325	0.028647	0.024689	0.279625	1687	2	0.21325
TOR1B	4	0.88614	0.90281	1	16180	0	0.16267	0.028661	0.024689	0.279625	1688	3	0.16267
ELL2	4	0.84729	0.86565	1	15412	0	0.066563	0.028676	0.024689	0.279625	1689	1	0.066563
AIDA	4	0.94237	0.95674	1	17430	0	0.18536	0.028766	0.024689	0.279625	1690	3	0.18536
EP400	4	0.56855	0.569	1	10572	1	0.14622	0.028766	0.024689	0.279625	1691	2	0.14622
SULT6B1	4	0.54481	0.54769	1	10253	1	0.11539	0.02878	0.024689	0.279625	1692	2	0.11539
TM6SF1	3	0.63318	0.63326	1	11512	0	0.18007	0.028834	0.028664	0.297849	1693	2	0.18007
PKNOX1	4	0.54569	0.54933	1	10265	1	0.16159	0.028836	0.024689	0.279625	1694	3	0.16159
CDKN2D	4	0.95655	0.9694	1	17763	0	0.14731	0.028865	0.024997	0.282944	1695	2	0.14731
GYLTL1B	4	0.92605	0.93967	1	17020	0	0.11902	0.028883	0.025227	0.284885	1696	2	0.11902
POC1A	4	0.65277	0.64611	1	11824	1	0.22563	0.028898	0.025227	0.284885	1697	3	0.22563
SERPINB11	4	0.034288	0.043411	0.444422	1844	2	-0.24938	0.028935	0.025228	0.284885	1698	1	-0.24938
TIGD3	4	0.9631	0.97518	1	17923	0	0.30076	0.028975	0.025228	0.284885	1699	2	0.30076
TAS2R60	4	0.84701	0.86565	1	15405	0	0.32401	0.029025	0.025479	0.28638	1700	3	0.32401
CREBRF	4	0.094141	0.1351	0.710752	3557	2	0.010884	0.029038	0.025479	0.28638	1701	2	0.010884
PHF3	4	0.51897	0.53451	1	9924	1	0.25778	0.029043	0.02548	0.28638	1702	3	0.25778
PXMP4	4	0.78495	0.78829	1	14199	0	0.18493	0.029054	0.02548	0.28638	1703	2	0.18493
BPIFB2	4	0.83481	0.84824	1	15171	0	0.25808	0.029066	0.02548	0.28638	1704	3	0.25808
KIAA2012	4	0.80002	0.8084	1	14498	0	0.060675	0.02909	0.02548	0.28638	1705	1	0.060675
ZNF710	4	0.84713	0.86565	1	15408	0	0.11554	0.029094	0.02548	0.28638	1706	2	0.11554
HIST1H1A	4	0.98636	0.99148	1	18509	0	0.27188	0.029114	0.0258	0.289633	1707	3	0.27188
IZUMO4	4	0.95885	0.97147	1	17823	0	0.19306	0.029142	0.026049	0.290565	1708	3	0.19306
INHBC	3	0.97086	0.98105	1	18112	0	0.12808	0.029142	0.029423	0.297849	1709	3	0.12808
ANKDD1B	4	0.70394	0.69708	1	12668	1	0.19271	0.029162	0.026049	0.290565	1710	3	0.19271
ZFYVE28	4	0.60726	0.60023	1	11128	1	0.18231	0.029167	0.026049	0.290565	1711	3	0.18231
TP53TG5	4	0.64936	0.64282	1	11765	1	0.08137	0.029193	0.026049	0.290565	1712	1	0.08137
KIF16B	3	0.97073	0.98082	1	18111	0	0.18457	0.029266	0.029642	0.297849	1713	3	0.18457
TBX5	3	0.62072	0.6136	1	11316	0	0.32647	0.029268	0.029642	0.297849	1714	2	0.32647
LRRC19	4	0.76414	0.76247	1	13807	0	0.21879	0.029294	0.026049	0.290565	1715	3	0.21879
FOSB	4	0.93469	0.94913	1	17240	0	0.19074	0.029294	0.026049	0.290565	1716	3	0.19074
SIRPA	4	0.8871	0.90281	1	16204	0	0.28528	0.029297	0.026049	0.290565	1717	3	0.28528
PDXDC1	4	0.96453	0.97594	1	17956	0	0.22933	0.029347	0.02605	0.290565	1718	3	0.22933
ATCAY	4	0.64107	0.63613	1	11637	1	0.16685	0.029349	0.02605	0.290565	1719	2	0.16685
SON	4	0.89193	0.90567	1	16297	0	0.23666	0.029364	0.02605	0.290565	1720	2	0.23666
KCNA10	3	0.97061	0.98082	1	18107	0	0.22245	0.029394	0.029643	0.297849	1721	3	0.22245
ASAH2	4	0.78764	0.79093	1	14244	0	0.13504	0.029478	0.02605	0.290565	1722	2	0.13504
U2AF1	3	0.97048	0.9806	1	18103	0	0.42109	0.029517	0.029852	0.297849	1723	3	0.42109
CNTN5	3	0.97046	0.9806	1	18101	0	0.14643	0.029542	0.029852	0.297849	1724	3	0.14643
OR4F6	4	0.83433	0.84723	1	15163	0	0.32142	0.029544	0.026308	0.291915	1725	3	0.32142
FZD8	4	0.92502	0.93915	1	16994	0	0.056427	0.029555	0.026308	0.291915	1726	2	0.056427
FJX1	4	0.78203	0.78435	1	14150	0	0.19229	0.029595	0.026308	0.291915	1727	3	0.19229
LCN9	4	0.18052	0.23886	0.846046	5341	1	0.045733	0.029607	0.026308	0.291915	1728	1	0.045733
OGFOD3	4	0.89638	0.90777	1	16380	0	0.15819	0.029625	0.026308	0.291915	1729	2	0.15819
ACSL6	4	0.92579	0.93967	1	17008	0	0.13508	0.029645	0.026309	0.291915	1730	2	0.13508
TAF6L	4	0.98066	0.98783	1	18374	0	0.182	0.029705	0.026309	0.291915	1731	3	0.182
TUBGCP2	3	0.97029	0.9806	1	18097	0	0.18384	0.029707	0.029852	0.297849	1732	3	0.18384
PGM5	4	0.66235	0.64944	1	11984	1	0.0092706	0.02971	0.026309	0.291915	1733	1	0.0092706
C11orf86	4	0.36521	0.42269	0.96036	8297	1	0.061339	0.029715	0.026309	0.291915	1734	2	0.061339
CHRM4	4	0.91625	0.93105	1	16806	0	0.14006	0.029743	0.026642	0.292506	1735	3	0.14006
ZDHHC13	4	0.78827	0.79352	1	14257	0	0.10284	0.029806	0.026989	0.292506	1736	2	0.10284
C19orf80	4	0.81629	0.82705	1	14819	0	0.2	0.029839	0.026989	0.292506	1737	3	0.2
GCH1	4	0.41909	0.44915	0.965782	8824	1	0.0087786	0.029865	0.026989	0.292506	1738	1	0.0087786
PICALM	4	0.85245	0.86661	1	15506	0	0.13872	0.029887	0.026989	0.292506	1739	2	0.13872
SLC44A5	4	0.64738	0.64281	1	11736	1	0.27566	0.029898	0.026989	0.292506	1740	3	0.27566
TMEM170B	4	0.87706	0.89455	1	16003	0	0.15716	0.02992	0.026989	0.292506	1741	3	0.15716
OR56B1	4	0.81266	0.82143	1	14750	0	0.19568	0.029931	0.026989	0.292506	1742	3	0.19568
RIN2	4	0.97396	0.9828	1	18188	0	0.17754	0.029957	0.026989	0.292506	1743	2	0.17754
TTC23	4	0.11317	0.15715	0.742498	3954	1	0.2165	0.030009	0.026989	0.292506	1744	3	0.2165
TSTD2	4	0.89731	0.90982	1	16394	0	0.16389	0.030009	0.026989	0.292506	1745	3	0.16389
OR51V1	3	0.49052	0.47571	0.98392	9596	1	0.32392	0.030039	0.030058	0.29817	1746	2	0.32392
LDLR	4	0.98328	0.98959	1	18436	0	0.26158	0.030044	0.026989	0.292506	1747	3	0.26158
HRK	4	0.55618	0.56076	1	10410	1	0.13367	0.030079	0.026989	0.292506	1748	2	0.13367
KMT2D	4	0.5039	0.52126	1	9747	1	0.15028	0.030082	0.026989	0.292506	1749	3	0.15028
IRAK4	4	0.31262	0.39648	0.953126	7838	1	0.3371	0.030089	0.026989	0.292506	1750	3	0.3371
SMAD2	4	0.76578	0.76247	1	13848	0	0.10341	0.030124	0.026989	0.292506	1751	2	0.10341
C21orf140	4	0.81045	0.81797	1	14704	0	0.25182	0.03013	0.026989	0.292506	1752	3	0.25182
C12orf66	4	0.67282	0.6626	1	12152	1	0.15525	0.030136	0.026989	0.292506	1753	3	0.15525
SLC25A30	4	0.03287	0.042257	0.442422	1790	2	0.0060509	0.030149	0.026989	0.292506	1754	2	0.0060509
GAS6	3	0.58204	0.57342	1	10777	1	-0.07465	0.030194	0.030059	0.29817	1755	1	-0.07465
TRIM21	4	0.83974	0.85221	1	15265	0	0.095757	0.03021	0.026989	0.292506	1756	2	0.095757
CCDC74B	4	0.94715	0.96211	1	17533	0	0.20379	0.03022	0.026989	0.292506	1757	3	0.20379
ERGIC3	4	0.95474	0.96819	1	17721	0	0.17861	0.030233	0.026989	0.292506	1758	3	0.17861
ZNF878	4	0.33361	0.40626	0.957614	8017	1	0.27731	0.030249	0.026989	0.292506	1759	3	0.27731
NUP214	3	0.96975	0.98037	1	18075	0	0.27949	0.030252	0.030059	0.29817	1760	3	0.27949
KRTAP6-2	4	0.96954	0.98045	1	18072	0	0.18796	0.030255	0.026989	0.292506	1761	3	0.18796
GDF1	4	0.79354	0.80227	1	14365	0	0.15374	0.030261	0.026989	0.292506	1762	2	0.15374
KLRC4-KLRK1	4	0.89789	0.90982	1	16412	0	0.26566	0.030298	0.026989	0.292506	1763	3	0.26566
HNRNPH1	4	0.98266	0.98932	1	18424	0	0.30941	0.030309	0.026989	0.292506	1764	3	0.30941
SV2B	4	0.46592	0.48506	0.99071	9311	1	0.2637	0.030312	0.026989	0.292506	1765	2	0.2637
DEK	4	0.73908	0.73722	1	13346	0	0.22351	0.030322	0.026989	0.292506	1766	3	0.22351
ADAMTS6	4	0.96803	0.97978	1	18041	0	0.22867	0.030325	0.026989	0.292506	1767	3	0.22867
PRKAA1	4	0.94743	0.96246	1	17535	0	0.35517	0.030347	0.026989	0.292506	1768	3	0.35517
XPOT	4	0.83689	0.84922	1	15212	0	0.17484	0.030352	0.026989	0.292506	1769	3	0.17484
GFRA4	4	0.84374	0.85992	1	15353	0	0.27254	0.030363	0.026989	0.292506	1770	3	0.27254
NAE1	4	0.93133	0.94696	1	17153	0	0.29299	0.030456	0.026989	0.292506	1771	3	0.29299
ATP9A	4	0.92719	0.94114	1	17055	0	0.29795	0.030464	0.026989	0.292506	1772	3	0.29795
RBCK1	4	0.474	0.49165	0.995024	9404	1	0.13569	0.030484	0.026989	0.292506	1773	2	0.13569
CFAP43	4	0.12947	0.18055	0.786805	4300	1	0.021014	0.030485	0.026989	0.292506	1774	1	0.021014
APCDD1L	4	0.17128	0.22605	0.833978	5156	1	-0.060659	0.030588	0.026989	0.292506	1775	1	-0.060659
PRLH	4	0.92004	0.93551	1	16891	0	0.22711	0.030658	0.027252	0.293693	1776	3	0.22711
C11orf70	4	0.37305	0.42763	0.96036	8366	1	0.065053	0.030692	0.027252	0.293693	1777	2	0.065053
PNPO	4	0.20389	0.27119	0.883498	5816	1	-0.0095959	0.030847	0.027252	0.293693	1778	1	-0.0095959
HRH3	4	0.90568	0.91853	1	16597	0	0.21532	0.030849	0.027252	0.293693	1779	3	0.21532
ENTPD2	4	0.47521	0.49496	0.998341	9416	1	0.21519	0.030885	0.027253	0.293693	1780	3	0.21519
OPHN1	3	0.96908	0.9799	1	18061	0	0.28799	0.030925	0.030495	0.29817	1781	3	0.28799
OR52B6	4	0.98916	0.99396	1	18596	0	0.25253	0.03094	0.027253	0.293693	1782	3	0.25253
RPS9	1	0.96903	0.99586	1	18060	0	0.37757	0.030965	0.0041354	0.116713	1783	1	0.37757
LMBRD2	4	0.97721	0.98575	1	18277	0	0.18093	0.03097	0.027253	0.293693	1784	3	0.18093
ZNF286B	4	0.39059	0.43267	0.96036	8542	1	0.035368	0.031001	0.027253	0.293693	1785	1	0.035368
TRIB3	4	0.75685	0.75668	1	13686	0	0.098827	0.031053	0.027253	0.293693	1786	2	0.098827
CSN3	4	0.54712	0.54934	1	10291	1	0.21795	0.031074	0.027253	0.293693	1787	3	0.21795
USP51	4	0.26176	0.33933	0.913698	6984	1	0.28329	0.031096	0.027501	0.294623	1788	3	0.28329
PRMT1	4	0.027228	0.033334	0.400882	1575	1	0.27717	0.031223	0.027755	0.294623	1789	3	0.27717
LRTM2	4	0.32741	0.40461	0.957614	7957	1	0.18991	0.031262	0.027755	0.294623	1790	3	0.18991
NKD2	4	0.97301	0.98198	1	18165	0	0.15419	0.031273	0.027755	0.294623	1791	3	0.15419
FBXL14	4	0.79625	0.80353	1	14426	0	0.089624	0.031311	0.027755	0.294623	1792	2	0.089624
RGR	4	0.92665	0.94017	1	17038	0	0.1187	0.031384	0.027755	0.294623	1793	3	0.1187
KCNMB3	4	0.80301	0.81081	1	14556	0	0.17535	0.031386	0.027755	0.294623	1794	3	0.17535
MGAT4B	4	0.783	0.7857	1	14171	0	0.21081	0.031437	0.027755	0.294623	1795	2	0.21081
SLC4A8	4	0.80896	0.81797	1	14670	0	0.12368	0.031466	0.027755	0.294623	1796	2	0.12368
C11orf74	4	0.96643	0.97793	1	18003	0	0.26026	0.031528	0.027755	0.294623	1797	3	0.26026
DRAM1	4	0.93724	0.95131	1	17302	0	0.22477	0.03153	0.027755	0.294623	1798	2	0.22477
JMY	4	0.97732	0.98575	1	18281	0	0.14012	0.031541	0.027755	0.294623	1799	3	0.14012
LPPR2	3	0.96843	0.9799	1	18046	0	0.11851	0.031572	0.03115	0.298909	1800	3	0.11851
PCDHGA8	4	0.62627	0.61976	1	11411	1	0.27132	0.031592	0.027755	0.294623	1801	3	0.27132
LMAN2	3	0.88363	0.90699	1	16129	0	0.25622	0.031626	0.03115	0.298909	1802	2	0.25622
SCP2	4	0.85105	0.86661	1	15485	0	0.16795	0.031665	0.027755	0.294623	1803	2	0.16795
TMED9	4	0.86593	0.88659	1	15781	0	0.10714	0.031672	0.027755	0.294623	1804	2	0.10714
FGD3	4	0.85586	0.86936	1	15569	0	0.13716	0.031685	0.027755	0.294623	1805	2	0.13716
PLEKHA2	4	0.63187	0.62794	1	11487	1	0.10143	0.031724	0.027755	0.294623	1806	2	0.10143
CNGB1	4	0.98918	0.99407	1	18597	0	0.20451	0.031727	0.027755	0.294623	1807	3	0.20451
AQP11	4	0.75519	0.75668	1	13653	0	0.21369	0.031758	0.027755	0.294623	1808	2	0.21369
GUCY2F	4	0.75752	0.75668	1	13698	0	0.24569	0.031784	0.027755	0.294623	1809	3	0.24569
S1PR1	4	0.9838	0.98959	1	18448	0	0.28538	0.031801	0.027755	0.294623	1810	3	0.28538
OR7D2	4	0.98239	0.98919	1	18418	0	0.21696	0.031807	0.027755	0.294623	1811	3	0.21696
CPQ	4	0.94365	0.9595	1	17451	0	0.12943	0.031818	0.027755	0.294623	1812	3	0.12943
AADAT	4	0.68478	0.6708	1	12332	1	0.26787	0.031832	0.02788	0.295785	1813	3	0.26787
PMS1	4	0.054024	0.074497	0.548947	2569	3	-0.18901	0.03193	0.028548	0.297849	1814	1	-0.18901
FAM53C	4	0.94606	0.96064	1	17506	0	0.16551	0.031936	0.028548	0.297849	1815	3	0.16551
TFAP2C	4	0.8883	0.90281	1	16229	0	0.2098	0.031955	0.028548	0.297849	1816	3	0.2098
LIN9	4	0.86365	0.88159	1	15735	0	0.1989	0.031982	0.028548	0.297849	1817	3	0.1989
KIAA1161	4	0.74797	0.74632	1	13512	0	0.1257	0.032028	0.028888	0.297849	1818	2	0.1257
OR52E8	4	0.54615	0.54933	1	10271	1	0.14407	0.032033	0.028888	0.297849	1819	2	0.14407
S100Z	4	0.86829	0.88821	1	15835	0	0.15478	0.03208	0.028888	0.297849	1820	2	0.15478
CHST1	4	0.90103	0.91593	1	16482	0	0.12663	0.032085	0.028888	0.297849	1821	2	0.12663
TBX10	4	0.92967	0.94408	1	17108	0	0.27208	0.032122	0.028888	0.297849	1822	2	0.27208
APOL5	4	0.40482	0.44251	0.965415	8692	1	0.20978	0.032132	0.028888	0.297849	1823	3	0.20978
CTF1	4	0.37784	0.42932	0.96036	8408	1	0.059481	0.032188	0.028888	0.297849	1824	2	0.059481
MRPL42	4	0.83972	0.85221	1	15264	0	0.26313	0.0322	0.028888	0.297849	1825	3	0.26313
ITGAD	4	0.31712	0.39812	0.953126	7878	1	0.16334	0.03224	0.028888	0.297849	1826	3	0.16334
GNG4	4	0.59582	0.58867	1	10973	1	0.14322	0.032273	0.028888	0.297849	1827	3	0.14322
CKMT2	4	0.56341	0.56575	1	10505	1	0.22007	0.032314	0.028888	0.297849	1828	3	0.22007
PEBP1	4	0.94385	0.9595	1	17458	0	0.24348	0.032335	0.028888	0.297849	1829	3	0.24348
MZB1	4	0.37301	0.42763	0.96036	8365	1	0.18093	0.032341	0.028888	0.297849	1830	2	0.18093
SDF4	4	0.011167	0.014663	0.315016	864	2	-0.10575	0.032343	0.028888	0.297849	1831	2	-0.10575
PRSS35	4	0.94116	0.95636	1	17403	0	0.27415	0.032351	0.028888	0.297849	1832	2	0.27415
PPP2CA	4	0.96129	0.97389	1	17877	0	0.20645	0.032352	0.028888	0.297849	1833	3	0.20645
HLA-DQB2	4	0.61978	0.61492	1	11299	1	0.21786	0.03242	0.028888	0.297849	1834	3	0.21786
RHD	4	0.10395	0.14084	0.713291	3757	2	-0.0025523	0.032446	0.028889	0.297849	1835	1	-0.0025523
CRTC1	4	0.87307	0.88983	1	15932	0	0.14396	0.032498	0.028889	0.297849	1836	3	0.14396
GCNT1	4	0.93433	0.94913	1	17229	0	0.13122	0.032508	0.028889	0.297849	1837	2	0.13122
LAT	4	0.97326	0.98239	1	18169	0	0.22257	0.032539	0.028889	0.297849	1838	3	0.22257
TOP3B	4	0.88468	0.90208	1	16142	0	0.14038	0.032601	0.028889	0.297849	1839	2	0.14038
TYK2	4	0.95404	0.96786	1	17702	0	0.16283	0.032634	0.028889	0.297849	1840	2	0.16283
PPP5C	4	0.69671	0.68709	1	12515	1	0.22882	0.032652	0.028889	0.297849	1841	3	0.22882
P2RY2	4	0.9025	0.91725	1	16515	0	0.29048	0.032669	0.028889	0.297849	1842	3	0.29048
ARL15	4	0.87439	0.89064	1	15958	0	0.23059	0.032726	0.028889	0.297849	1843	3	0.23059
STARD3NL	4	0.084224	0.11701	0.66162	3358	1	0.14045	0.032739	0.028889	0.297849	1844	2	0.14045
CDC14A	4	0.84984	0.86661	1	15465	0	0.072141	0.032755	0.028889	0.297849	1845	2	0.072141
PBX4	4	0.70643	0.69872	1	12708	1	0.18188	0.032794	0.028889	0.297849	1846	3	0.18188
CITED1	4	0.94406	0.9595	1	17461	0	0.25654	0.032851	0.028889	0.297849	1847	3	0.25654
AMER3	4	0.32758	0.40461	0.957614	7958	1	0.17211	0.032888	0.029144	0.297849	1848	3	0.17211
AIG1	4	0.81737	0.82815	1	14838	0	-0.039016	0.03291	0.029144	0.297849	1849	1	-0.039016
TMEM225	4	0.97848	0.98625	1	18318	0	0.19008	0.032954	0.029144	0.297849	1850	3	0.19008
CD320	4	0.97115	0.98112	1	18119	0	0.13917	0.03296	0.029144	0.297849	1851	3	0.13917
MEGF6	4	0.90314	0.91725	1	16531	0	0.17236	0.032994	0.029144	0.297849	1852	3	0.17236
PLN	4	0.47739	0.49662	0.998341	9441	1	0.11356	0.033	0.029144	0.297849	1853	3	0.11356
NDUFC1	4	0.74911	0.74777	1	13539	0	0.17998	0.033002	0.029144	0.297849	1854	2	0.17998
ANAPC13	4	0.93584	0.94955	1	17267	0	0.20332	0.033044	0.029144	0.297849	1855	3	0.20332
THSD7B	4	0.18415	0.24517	0.857644	5420	1	0.14547	0.033065	0.029144	0.297849	1856	2	0.14547
TRIM9	4	0.78396	0.78829	1	14183	0	0.22275	0.033068	0.029144	0.297849	1857	3	0.22275
CNRIP1	4	0.98806	0.99339	1	18564	0	0.14879	0.033126	0.029144	0.297849	1858	3	0.14879
WNT8B	4	0.45685	0.4785	0.988299	9207	1	0.032697	0.033168	0.029144	0.297849	1859	1	0.032697
OR6Q1	4	0.81152	0.81914	1	14727	0	0.17279	0.033213	0.029144	0.297849	1860	2	0.17279
ANKZF1	4	0.80249	0.8096	1	14544	0	0.13147	0.033219	0.029144	0.297849	1861	3	0.13147
MANBAL	4	0.92763	0.94114	1	17066	0	0.22247	0.03324	0.029144	0.297849	1862	3	0.22247
TXN	2	0.96674	0.98026	1	18008	0	0.47019	0.033261	0.021536	0.260123	1863	2	0.47019
FAM129B	4	0.84172	0.8561	1	15309	0	0.18402	0.033361	0.029144	0.297849	1864	3	0.18402
HIST1H2AB	4	0.45111	0.47199	0.97887	9147	1	0.018766	0.033374	0.029144	0.297849	1865	1	0.018766
INSL3	4	0.77893	0.78033	1	14087	0	0.28133	0.033446	0.029144	0.297849	1866	2	0.28133
AHNAK2	4	0.60469	0.59856	1	11095	1	0.2802	0.033488	0.029498	0.297849	1867	3	0.2802
OR4D9	4	0.98872	0.99358	1	18582	0	0.19466	0.033528	0.029498	0.297849	1868	3	0.19466
DAB2IP	4	0.91917	0.93441	1	16869	0	0.20695	0.033562	0.029498	0.297849	1869	3	0.20695
MAPKAPK5	4	0.11601	0.15715	0.742498	4005	1	0.29005	0.033563	0.029498	0.297849	1870	3	0.29005
DPF2	4	0.94421	0.9595	1	17465	0	0.11963	0.03358	0.029498	0.297849	1871	3	0.11963
PGA4	4	0.63147	0.62631	1	11483	1	0.28074	0.03358	0.029498	0.297849	1872	3	0.28074
ZNF428	4	0.16174	0.21862	0.833978	4955	1	0.2869	0.033603	0.029498	0.297849	1873	3	0.2869
SLC6A7	4	0.59614	0.58867	1	10975	1	0.16723	0.033626	0.029498	0.297849	1874	3	0.16723
HSD17B8	4	0.90093	0.91593	1	16478	0	0.051554	0.033683	0.029498	0.297849	1875	2	0.051554
MX1	4	0.98756	0.99291	1	18549	0	0.18582	0.03369	0.029498	0.297849	1876	3	0.18582
CEP250	4	0.91757	0.93331	1	16835	0	0.16466	0.033764	0.029498	0.297849	1877	2	0.16466
PEX11A	4	0.16687	0.22502	0.833978	5072	1	0.11944	0.033777	0.029498	0.297849	1878	3	0.11944
SREK1IP1	4	0.9819	0.98875	1	18402	0	0.23949	0.033786	0.029498	0.297849	1879	3	0.23949
ANKRA2	4	0.91727	0.93277	1	16831	0	0.21178	0.033823	0.029498	0.297849	1880	3	0.21178
FAM45A	4	0.74797	0.74632	1	13511	0	0.23148	0.03387	0.029498	0.297849	1881	3	0.23148
CASS4	4	0.51505	0.53286	1	9888	1	0.10604	0.033881	0.029498	0.297849	1882	2	0.10604
GRID1	4	0.23076	0.30253	0.904609	6338	1	0.23621	0.033928	0.029498	0.297849	1883	3	0.23621
YTHDF1	4	0.89377	0.90639	1	16330	0	0.34307	0.033945	0.029498	0.297849	1884	3	0.34307
MFSD6	4	0.95333	0.96656	1	17678	0	0.14935	0.03398	0.029498	0.297849	1885	3	0.14935
PDCL3	4	0.11677	0.15715	0.742498	4028	2	-0.045039	0.033992	0.029498	0.297849	1886	1	-0.045039
ANKH	4	0.96025	0.97311	1	17855	0	0.12709	0.034074	0.029498	0.297849	1887	3	0.12709
UBE2L6	4	0.87935	0.8969	1	16053	0	0.16259	0.034074	0.029498	0.297849	1888	2	0.16259
SMARCD3	4	0.9576	0.97028	1	17790	0	0.1563	0.034095	0.029498	0.297849	1889	2	0.1563
CXorf66	4	0.91518	0.92933	1	16786	0	0.1917	0.034114	0.029498	0.297849	1890	3	0.1917
KRTAP19-2	4	0.0019805	0.0023689	0.151887	291	2	0.016841	0.034148	0.029498	0.297849	1891	2	0.016841
HIST1H2AG	4	0.65998	0.64779	1	11942	1	0.11403	0.034198	0.029498	0.297849	1892	2	0.11403
SMIM10	4	0.6552	0.64611	1	11860	1	0.046493	0.034202	0.029498	0.297849	1893	2	0.046493
ART5	4	0.96943	0.98024	1	18068	0	0.16528	0.034237	0.029831	0.297849	1894	3	0.16528
PAIP1	4	0.85931	0.87468	1	15641	0	0.18896	0.034288	0.029831	0.297849	1895	2	0.18896
TMEM201	4	0.60065	0.59531	1	11040	1	0.19488	0.03429	0.029831	0.297849	1896	3	0.19488
LINC00452	4	0.034471	0.043797	0.444422	1851	3	-0.12826	0.034301	0.029831	0.297849	1897	1	-0.12826
PPIAL4D	3	0.9555	0.96809	1	17741	0	0.2271	0.034305	0.035952	0.325793	1898	2	0.2271
MOB3A	4	0.023079	0.029109	0.393911	1399	1	0.26411	0.03436	0.029831	0.297849	1899	3	0.26411
PABPC3	4	0.72122	0.71351	1	13003	0	-0.05195	0.034378	0.029831	0.297849	1900	1	-0.05195
BMP4	4	0.0079307	0.010481	0.267399	726	2	-0.088708	0.034378	0.029831	0.297849	1901	1	-0.088708
C5AR1	4	0.55457	0.56076	1	10387	1	0.13135	0.034389	0.029831	0.297849	1902	3	0.13135
USP16	4	0.90109	0.91593	1	16484	0	0.19324	0.034406	0.029831	0.297849	1903	2	0.19324
DAPL1	4	0.9033	0.91725	1	16535	0	0.15756	0.034413	0.029831	0.297849	1904	3	0.15756
KDM4C	4	0.98872	0.99358	1	18583	0	0.24466	0.034424	0.029831	0.297849	1905	3	0.24466
KRTAP5-7	4	0.75444	0.75378	1	13638	0	0.16473	0.034477	0.029831	0.297849	1906	3	0.16473
TRPM3	4	0.51619	0.53286	1	9900	1	0.15035	0.034502	0.029831	0.297849	1907	2	0.15035
RRP8	4	0.33823	0.41287	0.958075	8057	1	0.14222	0.03461	0.029832	0.297849	1908	2	0.14222
HIF1A	4	0.9149	0.92933	1	16779	0	0.21561	0.034618	0.029832	0.297849	1909	3	0.21561
NDUFC2-KCTD14	4	0.97775	0.9859	1	18297	0	0.1927	0.034661	0.029832	0.297849	1910	3	0.1927
ZNF484	4	0.97494	0.98375	1	18213	0	0.21801	0.034677	0.029832	0.297849	1911	3	0.21801
LURAP1L	4	0.64979	0.64444	1	11774	1	0.13115	0.034713	0.029832	0.297849	1912	2	0.13115
DBH	4	0.94415	0.9595	1	17463	0	0.20399	0.034713	0.029832	0.297849	1913	3	0.20399
SH3YL1	4	0.8333	0.84519	1	15145	0	0.17342	0.034736	0.029832	0.297849	1914	3	0.17342
ANXA8	4	0.93218	0.94741	1	17172	0	0.12034	0.034825	0.029832	0.297849	1915	2	0.12034
SLC27A5	4	0.70816	0.70037	1	12747	1	0.20927	0.034858	0.029832	0.297849	1916	2	0.20927
TRMT2A	4	0.95416	0.96786	1	17705	0	0.19183	0.034867	0.029832	0.297849	1917	3	0.19183
DTX2	4	0.54434	0.54769	1	10249	1	0.0765	0.034923	0.030196	0.29817	1918	2	0.0765
MUC15	4	0.9698	0.98045	1	18077	0	0.15495	0.034931	0.030196	0.29817	1919	3	0.15495
PADI3	4	0.35418	0.41608	0.958075	8204	1	0.23918	0.034944	0.030196	0.29817	1920	2	0.23918
KLHDC3	4	0.97609	0.98505	1	18248	0	0.24871	0.034998	0.030196	0.29817	1921	2	0.24871
NELL1	4	0.9886	0.99358	1	18581	0	0.14797	0.035011	0.030196	0.29817	1922	3	0.14797
MRGPRX4	4	0.93729	0.95131	1	17305	0	0.16726	0.035026	0.030196	0.29817	1923	3	0.16726
OR52N5	4	0.77546	0.77769	1	14017	0	0.12444	0.035109	0.030196	0.29817	1924	3	0.12444
TRIM43B	4	0.60753	0.60023	1	11130	1	0.080959	0.03515	0.030478	0.29817	1925	2	0.080959
HNRNPK	4	0.51327	0.52947	1	9865	1	0.26834	0.035157	0.030478	0.29817	1926	3	0.26834
PSPN	4	0.88542	0.90208	1	16167	0	0.16648	0.035171	0.030478	0.29817	1927	2	0.16648
H2AFX	4	0.62111	0.61492	1	11324	1	-0.0015193	0.035176	0.030478	0.29817	1928	1	-0.0015193
OR1K1	4	0.88616	0.90281	1	16181	0	0.15455	0.035204	0.030478	0.29817	1929	2	0.15455
CRYAA	4	0.51287	0.52947	1	9857	1	0.15095	0.035258	0.030478	0.29817	1930	3	0.15095
DYDC2	4	0.92418	0.93915	1	16969	0	0.13937	0.035279	0.030478	0.29817	1931	3	0.13937
HIST1H2BD	4	0.94958	0.96319	1	17594	0	0.15053	0.035291	0.030478	0.29817	1932	2	0.15053
BPIFB1	3	0.62455	0.62029	1	11388	0	0.20924	0.035338	0.036279	0.325793	1933	2	0.20924
TPGS1	4	0.96819	0.97978	1	18043	0	0.12966	0.035365	0.030479	0.29817	1934	3	0.12966
SYTL2	4	0.22602	0.29891	0.904609	6255	2	0.028348	0.035378	0.030479	0.29817	1935	2	0.028348
GMIP	4	0.79301	0.80227	1	14353	0	0.098503	0.035388	0.030479	0.29817	1936	2	0.098503
C5orf67	4	0.028418	0.035293	0.417033	1613	1	0.12952	0.035419	0.030479	0.29817	1937	3	0.12952
OR9G1	4	0.80069	0.8084	1	14514	0	0.090763	0.035433	0.030479	0.29817	1938	3	0.090763
MARK2	4	0.73572	0.7357	1	13282	0	0.11229	0.035485	0.030479	0.29817	1939	2	0.11229
TP53BP1	4	0.45427	0.47361	0.98052	9184	1	0.26824	0.035494	0.030479	0.29817	1940	3	0.26824
CDS2	4	0.73466	0.73258	1	13260	0	0.25635	0.035503	0.030479	0.29817	1941	3	0.25635
PSMD1	4	0.21175	0.28335	0.896513	5968	1	0.19701	0.035544	0.03082	0.29817	1942	3	0.19701
ITGB2	4	0.94158	0.95636	1	17416	0	0.1287	0.035573	0.03082	0.29817	1943	2	0.1287
PRPH2	4	0.9133	0.92821	1	16750	0	0.12757	0.035587	0.03082	0.29817	1944	2	0.12757
DPF3	4	0.2146	0.2857	0.901553	6013	2	-0.0062815	0.035617	0.03082	0.29817	1945	2	-0.0062815
EBF4	4	0.9167	0.93164	1	16817	0	0.21425	0.035652	0.03082	0.29817	1946	3	0.21425
PRKACA	4	0.82022	0.83145	1	14898	0	0.22496	0.035682	0.03082	0.29817	1947	3	0.22496
KLC4	4	0.47687	0.49662	0.998341	9433	1	0.046827	0.03569	0.03082	0.29817	1948	2	0.046827
CSK	4	0.3562	0.41608	0.958075	8225	1	0.24758	0.035712	0.03082	0.29817	1949	3	0.24758
KCNK10	4	0.19858	0.2625	0.875939	5710	1	0.17984	0.035742	0.03082	0.29817	1950	2	0.17984
KBTBD3	4	0.66345	0.65268	1	12004	1	0.12568	0.03577	0.03082	0.29817	1951	2	0.12568
CLEC2D	4	0.036719	0.047778	0.461064	1946	1	0.18376	0.035784	0.03082	0.29817	1952	3	0.18376
QRICH1	4	0.90254	0.91725	1	16517	0	0.074818	0.035793	0.03082	0.29817	1953	1	0.074818
TXNRD2	4	0.73783	0.73722	1	13325	0	0.22842	0.035813	0.03082	0.29817	1954	3	0.22842
RPS24	2	0.96417	0.97782	1	17949	0	0.51774	0.03583	0.023958	0.277603	1955	2	0.51774
FTMT	4	0.30195	0.38827	0.944466	7744	1	0.15448	0.035832	0.03082	0.29817	1956	3	0.15448
AIP	4	0.73487	0.73415	1	13264	0	0.12771	0.035847	0.03082	0.29817	1957	3	0.12771
CDC34	4	0.76315	0.76247	1	13791	0	0.18112	0.035934	0.03082	0.29817	1958	2	0.18112
C16orf52	4	0.8737	0.89064	1	15943	0	0.2075	0.035947	0.03082	0.29817	1959	3	0.2075
MAP1B	4	0.98944	0.99407	1	18606	0	0.18588	0.035956	0.03082	0.29817	1960	3	0.18588
HORMAD1	4	0.86817	0.88821	1	15831	0	0.2702	0.035989	0.03082	0.29817	1961	3	0.2702
FIGNL1	4	0.69512	0.68377	1	12489	1	0.20657	0.036049	0.03082	0.29817	1962	3	0.20657
NCOA6	4	0.42651	0.45411	0.969516	8895	1	0.10135	0.03605	0.03082	0.29817	1963	2	0.10135
PKP4	4	0.9327	0.94784	1	17186	0	0.25648	0.036054	0.03082	0.29817	1964	3	0.25648
CHPF	4	0.68671	0.67732	1	12365	1	0.16733	0.036102	0.03082	0.29817	1965	2	0.16733
SLN	4	0.0067218	0.0096344	0.267399	669	1	0.27986	0.036116	0.03082	0.29817	1966	3	0.27986
PANO1	4	0.97003	0.98045	1	18085	0	0.11432	0.03614	0.03082	0.29817	1967	3	0.11432
KLK3	4	0.38094	0.43099	0.96036	8442	1	0.034716	0.036153	0.03082	0.29817	1968	2	0.034716
EMD	4	0.028004	0.035017	0.416085	1604	2	-0.049292	0.036153	0.03082	0.29817	1969	1	-0.049292
GLS2	4	0.71382	0.70531	1	12865	1	0.34613	0.036161	0.03082	0.29817	1970	3	0.34613
TMEM62	4	0.97595	0.98488	1	18240	0	0.18201	0.03617	0.03082	0.29817	1971	3	0.18201
KCNC2	4	0.23291	0.30564	0.904609	6388	1	0.12719	0.036182	0.03082	0.29817	1972	3	0.12719
CCDC39	4	0.88458	0.90208	1	16140	0	0.16826	0.036194	0.03082	0.29817	1973	3	0.16826
EXOC6B	4	0.51317	0.52947	1	9863	1	0.25637	0.036205	0.03082	0.29817	1974	2	0.25637
ZNF791	4	0.9875	0.99291	1	18544	0	0.20968	0.036256	0.03082	0.29817	1975	3	0.20968
PCBP3	3	0.6628	0.66023	1	11989	0	0.1957	0.036361	0.036619	0.325793	1976	2	0.1957
SMN1	4	0.96312	0.97518	1	17924	0	0.33118	0.036482	0.031194	0.298909	1977	3	0.33118
GEMIN6	3	0.78218	0.80742	1	14154	0	0.30192	0.036518	0.036619	0.325793	1978	2	0.30192
ZSCAN9	4	0.88804	0.90281	1	16222	0	0.18216	0.036546	0.031194	0.298909	1979	3	0.18216
GDF7	4	0.5937	0.58373	1	10943	1	0.047816	0.036564	0.031194	0.298909	1980	2	0.047816
RASAL3	4	0.933	0.94784	1	17191	0	0.17107	0.036577	0.031194	0.298909	1981	3	0.17107
WDR70	4	0.98156	0.98875	1	18395	0	0.35489	0.036604	0.031194	0.298909	1982	3	0.35489
C22orf23	4	0.90156	0.91593	1	16495	0	0.11276	0.036616	0.031194	0.298909	1983	2	0.11276
ARNT2	4	0.18184	0.23991	0.846046	5373	2	0.030412	0.036667	0.031194	0.298909	1984	2	0.030412
RND3	4	0.81847	0.82815	1	14862	0	0.14328	0.036674	0.031194	0.298909	1985	3	0.14328
CCDC67	4	0.97286	0.98177	1	18159	0	0.25991	0.036692	0.031194	0.298909	1986	2	0.25991
NTMT1	4	0.17046	0.22605	0.833978	5144	1	0.17798	0.036699	0.031194	0.298909	1987	3	0.17798
TENM4	4	0.65655	0.64611	1	11886	1	0.20518	0.036723	0.031194	0.298909	1988	3	0.20518
PCDHB14	4	0.96376	0.97594	1	17940	0	0.27562	0.036729	0.031194	0.298909	1989	3	0.27562
IGSF23	4	0.90559	0.91853	1	16595	0	0.21874	0.036769	0.031194	0.298909	1990	3	0.21874
C11orf96	4	0.67164	0.6626	1	12127	1	0.14232	0.036791	0.031194	0.298909	1991	3	0.14232
OARD1	4	0.082129	0.11512	0.660629	3309	2	-0.032018	0.036821	0.031194	0.298909	1992	2	-0.032018
PPAP2B	4	0.6443	0.63951	1	11678	1	0.1477	0.036858	0.031194	0.298909	1993	2	0.1477
REPS2	4	0.26859	0.35077	0.922211	7122	2	0.065696	0.036869	0.031194	0.298909	1994	2	0.065696
ZSCAN5A	4	0.9612	0.97389	1	17872	0	0.17978	0.036906	0.031457	0.299778	1995	3	0.17978
PHLPP1	4	0.062511	0.096893	0.623869	2861	1	0.095495	0.036913	0.031457	0.299778	1996	2	0.095495
ATP1B4	4	0.98941	0.99407	1	18604	0	0.16196	0.036924	0.031457	0.299778	1997	3	0.16196
NAIF1	4	0.64369	0.63951	1	11670	1	0.25395	0.036968	0.031457	0.299778	1998	2	0.25395
TRIM40	4	0.65198	0.64444	1	11811	1	0.20212	0.036979	0.031457	0.299778	1999	3	0.20212
[truncated: 17,108 more rows]

## Sheet: sgRNA summary
sgrna	Gene	control_count	treatment_count	control_mean	treat_mean	LFC	control_var	adj_var	score	p.low	p.high	p.twosided	FDR	high_in_treatment
BRUGEN04645	DDX6	1110/1045.1/943.3	3237.6/3274.4/4042.1	1045.1	3274.4	1.6467	7284.4	3767.3	36.322	1	3.7001e-289	7.4003e-289	5.7308e-284	TRUE
BRUGEN19632	TSC2	2149.4/2340.4/2541.3	5206/4438.9/6461.1	2340.4	5206	1.1531	38421	8765.3	30.607	1	4.8943e-206	9.7886e-206	3.7902e-201	TRUE
BRUGEN04644	DDX6	479.43/432.13/417.09	1155.4/1070.5/1299.3	432.13	1155.4	1.4168	1232	1494.8	18.708	1	2.1384e-78	4.2768e-78	1.104e-73	TRUE
BRUGEN43849	SMG9	246.77/311.22/289.62	823.12/702.36/883.26	289.62	823.12	1.5037	1151.3	983.5	17.012	1	3.3633e-65	6.7265e-65	1.3023e-60	TRUE
BRUGEN28237	NXF1	574.11/497.31/548.64	1271.3/1079.2/1359.1	548.64	1271.3	1.2108	1641.7	1919	16.496	1	1.9639e-61	3.9279e-61	6.0836e-57	TRUE
BRUGEN49971	ARMC5	322.31/376.4/283.5	615.81/816.67/950.69	322.31	816.67	1.3386	2216.1	1099.9	14.906	1	1.5005e-50	3.0011e-50	3.8735e-46	TRUE
BRUGEN20657	ZNF131	712.1/568.81/646.54	1188.9/1327.2/1442.7	646.54	1327.2	1.0364	5170.2	2278.7	14.259	1	1.9684e-46	3.9368e-46	4.3552e-42	TRUE
BRUGEN28236	NXF1	333.39/214.49/196.82	562.97/578.36/557.5	214.49	562.97	1.388	7224.9	718.41	13.002	1	5.9844e-39	1.1969e-38	1.1586e-34	TRUE
BRUGEN26581	SLC23A1	597.28/705.49/642.46	747.92/1274.9/1253.7	642.46	1253.7	0.96337	3007.1	2263.7	12.846	1	4.518e-38	9.0361e-38	7.0882e-34	TRUE
BRUGEN28298	CARM1	532.82/558.3/482.36	1069/1087/1203.3	532.82	1087	1.0272	1597.7	1861.1	12.845	1	4.5765e-38	9.153e-38	7.0882e-34	TRUE
BRUGEN28296	CARM1	502.6/570.91/527.23	1041.6/942.61/1188.1	527.23	1041.6	0.98096	1257.4	1840.6	11.989	1	2.0221e-33	4.0443e-33	2.8472e-29	TRUE
BRUGEN62374	OR6B3	263.89/150.35/115.24	488.79/410.76/196.6	150.35	410.76	1.4439	7062.2	495.51	11.698	1	6.4915e-32	1.2983e-31	8.3785e-28	TRUE
BRUGEN13705	PF4V1	334.4/337.5/954.52	731.66/438.85/847.17	337.5	731.66	1.114	190360	1154.2	11.602	1	2.0131e-31	4.0263e-31	2.3985e-27	TRUE
BRUGEN19631	TSC1	505.62/573.02/621.05	927.79/1080.2/1374.3	573.02	1080.2	0.91344	3424.5	2008.3	11.317	1	5.3952e-30	1.079e-29	5.9687e-26	TRUE
BRUGEN25442	FEZ1	1168.4/943.11/907.61	1611.7/1246.8/1573.7	943.11	1573.7	0.73808	26001	3383.3	10.842	1	1.0918e-27	2.1837e-27	1.1274e-23	TRUE
BRUGEN01074	ARF1	619.44/340.65/420.15	589.39/820.55/830.08	420.15	820.55	0.96401	23017	1451.5	10.51	1	3.8977e-26	7.7954e-26	3.773e-22	TRUE
BRUGEN12262	NDP	613.39/711.8/580.26	605.65/1185.8/1092.2	613.39	1092.2	0.83133	5391	2156.6	10.31	1	3.1591e-25	6.3182e-25	2.8782e-21	TRUE
BRUGEN23311	MCM3AP	93.671/94.626/90.761	316.04/238.32/272.58	93.671	272.58	1.531	4.6915	302.18	10.292	1	3.8398e-25	7.6795e-25	3.3039e-21	TRUE
BRUGEN28297	CARM1	440.15/418.46/289.62	732.68/798.27/853.82	418.46	798.27	0.93015	8535.3	1445.3	9.9903	1	8.4041e-24	1.6808e-23	6.8507e-20	TRUE
BRUGEN67836	ZFP82	748.36/889.49/796.45	1081.2/1309.8/1449.3	796.45	1309.8	0.71696	5484.3	2834.6	9.6416	1	2.6673e-22	5.3345e-22	2.0656e-18	TRUE
BRUGEN76804	NonTargetingControl	831.96/831.66/1025.9	729.63/1341.7/1700	831.96	1341.7	0.68887	18807	2967	9.359	1	4.0258e-21	8.0515e-21	2.9691e-17	TRUE
BRUGEN40765	ANKRD49	451.23/369.04/280.44	833.28/697.51/568.9	369.04	697.51	0.9166	7302.8	1267.3	9.227	1	1.3913e-20	2.7826e-20	9.7947e-17	TRUE
BRUGEN26315	SMG7	125.9/155.61/156.03	320.1/364.26/422.64	155.61	364.26	1.2218	441.31	513.64	9.2064	1	1.6861e-20	3.3723e-20	1.1354e-16	TRUE
BRUGEN04646	DDX6	175.26/193.46/188.66	418.67/401.07/508.11	188.66	418.67	1.1459	101.35	628.22	9.1769	1	2.2176e-20	4.4352e-20	1.4311e-16	TRUE
BRUGEN04346	CYP2A6	484.47/548.83/720.99	738.77/950.36/1834	548.83	950.36	0.791	16890	1919.7	9.1645	1	2.4897e-20	4.9794e-20	1.5424e-16	TRUE
BRUGEN19634	TSC2	308.21/296.5/323.27	603.62/523.14/639.18	308.21	603.62	0.96745	182.03	1049.6	9.1183	1	3.8173e-20	7.6346e-20	2.274e-16	TRUE
BRUGEN40208	MTMR12	1.0072/0/9.178	18.292/15.5/14.246	1.0072	15.5	3.0392	33.888	2.6761	8.8595	1	5.4995e-19	1.0999e-18	3.042e-15	TRUE
BRUGEN20710	ZNF146	1144.2/1186/983.07	1195/1712.8/1752.3	1144.2	1712.8	0.58159	13854	4142.1	8.8346	1	5.0235e-19	1.0047e-18	2.8817e-15	TRUE
BRUGEN76887	NonTargetingControl	1264.1/1336.3/985.11	614.8/743.05/670.52	1264.1	670.52	-0.9137	41517	4597.6	8.7535	1.0345e-18	1	2.0689e-18	5.5248e-15	FALSE
BRUGEN12942	NUP98	182.31/205.02/181.52	415.62/388.48/396.99	182.31	396.99	1.1185	258.36	606.11	8.7203	1	1.3877e-18	2.7754e-18	7.1643e-15	TRUE
BRUGEN19635	TSC2	1352.7/1483.5/1545	2001.9/2122.6/2420.9	1483.5	2122.6	0.51649	10447	5436.9	8.6667	1	2.2233e-18	4.4466e-18	1.1108e-14	TRUE
BRUGEN24423	SRSF11	242.74/210.28/184.58	325.18/449.51/439.73	210.28	439.73	1.0607	857.01	703.69	8.6497	1	2.5821e-18	5.1642e-18	1.2213e-14	TRUE
BRUGEN21934	NSMAF	1079.7/1135.5/1184	1689.9/2201/1485.4	1135.5	1689.9	0.5732	2729.5	4109.3	8.6488	1	2.6022e-18	5.2044e-18	1.2213e-14	TRUE
BRUGEN01275	ASPA	1180.5/1026.2/1034.1	804.83/508.6/300.12	1034.1	508.6	-1.0223	10747	3725.6	8.6087	3.6963e-18	1	7.3926e-18	1.6838e-14	FALSE
BRUGEN73769	KIAA0754	342.45/82.009/65.266	69.101/220.88/496.72	82.009	220.88	1.4184	34056	262.99	8.5633	1	5.4862e-18	1.0972e-17	2.4277e-14	TRUE
BRUGEN14639	PPP2R4	378.71/283.88/196.82	548.75/603.54/494.82	283.88	548.75	0.94842	8286.5	963.13	8.5347	1	7.0286e-18	1.4057e-17	3.0239e-14	TRUE
BRUGEN33400	EDC4	662.75/642.41/652.66	1082.2/992.02/1049.5	652.66	1049.5	0.68442	103.43	2301.3	8.2716	1	6.6072e-17	1.3214e-16	2.7658e-13	TRUE
BRUGEN21326	NPRL3	2771.9/3152.1/3378.5	3868.7/4048.5/7390	3152.1	4048.5	0.36097	97931	11975	8.1915	1	1.29e-16	2.58e-16	5.2578e-13	TRUE
BRUGEN47719	CDH22	759.44/577.22/631.25	625.98/1017.2/1026.7	631.25	1017.2	0.68748	9676.3	2222.3	8.1873	1	1.3358e-16	2.6716e-16	5.3048e-13	TRUE
BRUGEN13383	PCBP2	462.31/463.67/405.87	927.79/727.55/788.29	462.31	788.29	0.76857	1593.6	1604.2	8.1387	1	1.9973e-16	3.9946e-16	7.6053e-13	TRUE
BRUGEN59837	LYPD6	141.01/155.61/167.24	154.46/340.04/368.5	155.61	340.04	1.1228	174.25	513.64	8.1378	1	2.0132e-16	4.0265e-16	7.6053e-13	TRUE
BRUGEN30358	STRAP	219.57/176.64/178.46	406.48/375.88/293.47	178.46	375.88	1.0704	846.72	592.76	8.1088	1	2.5566e-16	5.1132e-16	9.4278e-13	TRUE
BRUGEN22620	EIF3H	271.95/193.46/206	417.66/461.13/362.8	206	417.66	1.0162	2253.4	688.7	8.0654	1	3.6505e-16	7.301e-16	1.289e-12	TRUE
BRUGEN67867	OR10H5	224.61/187.15/177.44	341.44/422.38/388.45	187.15	388.45	1.0495	748.71	622.96	8.065	1	3.6619e-16	7.3238e-16	1.289e-12	TRUE
BRUGEN36051	EIF3K	335.4/282.83/308.99	570.09/535.73/602.14	308.99	570.09	0.88147	691.05	1052.4	8.0482	1	4.2019e-16	8.4039e-16	1.4462e-12	TRUE
BRUGEN19350	CLDN5	1065.6/1100.8/1128.9	650.37/598.7/483.42	1100.8	598.7	-0.87758	1013.3	3977.9	7.9613	8.5146e-16	1	1.7029e-15	2.8669e-12	FALSE
BRUGEN06618	ADAM2	1409.1/1030.4/2118.1	715.4/842.83/877.56	1409.1	842.83	-0.74077	323050	5151.5	7.8895	1.5168e-15	1	3.0336e-15	4.9985e-12	FALSE
BRUGEN12544	NFKBIA	1159.3/1081.9/1200.3	630.04/704.3/650.58	1159.3	650.58	-0.8325	3835.8	4199.4	7.8504	2.0737e-15	1	4.1474e-15	6.6913e-12	FALSE
BRUGEN18422	STK11	1243.9/1354.2/1345.1	1635.1/1948.2/1894.7	1345.1	1894.7	0.49398	5160.5	4906.8	7.8467	1	2.1355e-15	4.2711e-15	6.7502e-12	TRUE
BRUGEN04647	DDX6	387.78/357.48/323.27	589.39/630.67/711.36	357.48	630.67	0.81729	1044.1	1225.8	7.8031	1	3.0212e-15	6.0424e-15	9.3586e-12	TRUE
BRUGEN38666	EIF3L	270.94/207.13/216.19	401.4/425.29/560.35	216.19	425.29	0.97285	1539.7	724.39	7.7689	1	3.9583e-15	7.9166e-15	1.2021e-11	TRUE
BRUGEN07646	MKNK2	662.75/523.6/536.41	870.88/670.39/1015.3	536.41	870.88	0.69812	8063.2	1874.2	7.726	1	5.5482e-15	1.1096e-14	1.6525e-11	TRUE
BRUGEN10294	IPO5	919.59/839.02/763.82	418.67/493.1/358.05	839.02	418.67	-1.0012	6073.3	2993.4	7.6829	7.775e-15	1	1.555e-14	2.2721e-11	FALSE
BRUGEN19633	TSC2	241.73/254.44/253.93	478.63/448.54/560.35	253.93	478.63	0.91184	74.481	857.11	7.6752	1	8.2567e-15	1.6513e-14	2.3682e-11	TRUE
BRUGEN30108	NUPL2	220.58/193.46/190.7	388.19/364.26/410.29	193.46	388.19	1.001	371.6	644.93	7.6678	1	8.7467e-15	1.7493e-14	2.4631e-11	TRUE
BRUGEN21327	NPRL3	603.32/782.24/744.44	1137.1/1096.6/1503.4	744.44	1137.1	0.61049	10672	2641.1	7.6409	1	1.0783e-14	2.1565e-14	2.9822e-11	TRUE
BRUGEN43240	CCAR1	413.97/384.81/386.5	681.87/562.86/663.87	386.5	663.87	0.77889	378.66	1330.1	7.6055	1	1.4185e-14	2.837e-14	3.8544e-11	TRUE
BRUGEN63944	DCP2	628.5/550.94/571.08	860.72/909.68/932.65	571.08	909.68	0.67073	1851.6	2001.2	7.5691	1	1.8796e-14	3.7591e-14	5.0191e-11	TRUE
BRUGEN71560	OR51M1	540.87/513.09/624.11	869.86/713.02/957.34	540.87	869.86	0.68449	3849.9	1890.5	7.5664	1	1.9187e-14	3.8373e-14	5.0367e-11	TRUE
BRUGEN09843	ITIH3	1110/816.94/1172.7	712.35/632.61/592.64	1110	632.61	-0.81013	44899	4012.4	7.5358	2.4272e-14	1	4.8545e-14	6.2656e-11	FALSE
BRUGEN30366	ADAMTS7	298.14/486.8/342.65	625.98/595.79/434.98	342.65	595.79	0.79631	11381	1172.6	7.3926	1	7.2017e-14	1.4403e-13	1.8286e-10	TRUE
BRUGEN28299	CARM1	527.78/557.24/575.16	883.07/857.36/948.79	557.24	883.07	0.66327	594.48	1950.5	7.3777	1	8.0503e-14	1.6101e-13	2.011e-10	TRUE
BRUGEN04987	DPH1	654.69/644.51/582.3	295.71/270.29/316.26	644.51	295.71	-1.1214	1987.2	2271.3	7.3188	1.2508e-13	1	2.5017e-13	3.0751e-10	FALSE
BRUGEN28768	NPRL2	504.61/425.82/539.46	682.88/810.86/975.39	504.61	810.86	0.68319	3711.7	1758.1	7.3038	1	1.3992e-13	2.7984e-13	3.3861e-10	TRUE
BRUGEN10128	KCNS1	1045.5/881.08/957.58	1388.1/1383.4/1334.4	957.58	1383.4	0.5303	6790.5	3437.6	7.2628	1	1.8954e-13	3.7909e-13	4.5165e-10	TRUE
BRUGEN22251	API5	885.34/809.58/651.64	400.38/462.1/419.79	809.58	419.79	-0.94587	15342	2883.5	7.2589	1.9509e-13	1	3.9017e-13	4.5781e-10	FALSE
BRUGEN18247	SSB	368.64/260.75/224.35	513.18/475.67/408.39	260.75	475.67	0.8648	6482.7	881.2	7.2399	1	2.2444e-13	4.4889e-13	5.1884e-10	TRUE
BRUGEN20983	RNF103	1091.8/1244.9/1255.4	1581.2/2018.9/1727.6	1244.9	1727.6	0.47245	11766	4524.5	7.1765	1	3.5766e-13	7.1532e-13	8.1463e-10	TRUE
BRUGEN37892	NAA20	124.89/103.04/100.96	268.28/233.47/196.6	103.04	233.47	1.1723	241.03	333.83	7.139	1	4.7018e-13	9.4037e-13	1.0554e-09	TRUE
BRUGEN65851	KDM1B	431.09/407.94/546.6	705.24/732.39/573.65	431.09	705.24	0.70883	6939.7	1491	7.0999	1	6.2442e-13	1.2488e-12	1.3816e-09	TRUE
BRUGEN12403	DRG1	319.29/365.89/314.09	552.81/575.45/542.3	319.29	552.81	0.79003	1099.3	1089.1	7.0761	1	7.4159e-13	1.4832e-12	1.6177e-09	TRUE
BRUGEN46863	TGIF2	1149.2/1066.1/944.32	1373.9/1504.5/1677.2	1066.1	1504.5	0.49652	10872	3846.7	7.0681	1	7.8518e-13	1.5704e-12	1.689e-09	TRUE
BRUGEN29091	NUP50	258.85/208.18/214.15	508.1/369.1/402.69	214.15	402.69	0.90788	1016.9	717.25	7.0398	1	9.6224e-13	1.9245e-12	2.0416e-09	TRUE
BRUGEN07208	GLE1	212.52/174.53/152.97	293.68/342.94/384.65	174.53	342.94	0.97043	954.14	579.12	6.9982	1	1.2961e-12	2.5922e-12	2.7127e-09	TRUE
BRUGEN25414	GNA14	450.23/411.1/394.66	537.57/674.26/699.96	411.1	674.26	0.71246	900.62	1418.8	6.9867	1	1.4068e-12	2.8136e-12	2.9052e-09	TRUE
BRUGEN49973	ARMC5	494.54/541.47/545.58	821.09/841.86/854.77	541.47	841.86	0.63574	1109.7	1892.7	6.9046	1	2.517e-12	5.0341e-12	5.1295e-09	TRUE
BRUGEN66927	SVIP	722.17/618.23/605.75	939.98/837.99/1076.1	618.23	939.98	0.6037	5480.4	2174.4	6.9001	1	2.5978e-12	5.1956e-12	5.2254e-09	TRUE
BRUGEN25588	DEPDC5	563.03/546.73/563.94	868.85/925.18/751.25	563.03	868.85	0.62498	133.31	1971.7	6.8872	1	2.8457e-12	5.6914e-12	5.6506e-09	TRUE
BRUGEN38316	BET1L	228.64/223.95/267.18	275.39/464.04/418.84	228.64	418.84	0.87047	753.86	768.05	6.863	1	3.3711e-12	6.7423e-12	6.6092e-09	TRUE
BRUGEN38669	EIF3L	196.41/175.58/153.99	372.94/340.04/332.41	175.58	340.04	0.94958	450.01	582.77	6.8123	1	4.801e-12	9.6019e-12	9.2948e-09	TRUE
BRUGEN72166	PATE4	746.35/678.16/573.12	972.5/1014.3/1010.5	678.16	1010.5	0.57472	7841.5	2395.5	6.7909	1	5.5717e-12	1.1143e-11	1.062e-08	TRUE
BRUGEN34156	SIN3A	337.42/321.73/375.28	568.05/541.54/648.68	337.42	568.05	0.74976	839.84	1153.9	6.7896	1	5.6227e-12	1.1245e-11	1.062e-08	TRUE
BRUGEN55263	DPH6	479.43/433.18/442.59	233.73/179.22/130.12	442.59	179.22	-1.2994	723.17	1532.7	6.7272	8.6493e-12	1	1.7299e-11	1.6024e-08	FALSE
BRUGEN20917	ZYX	926.64/954.67/970.83	515.21/560.92/672.42	954.67	560.92	-0.76616	523.57	3426.7	6.7265	8.6905e-12	1	1.7381e-11	1.6024e-08	FALSE
BRUGEN68393	SCAI	426.05/382.71/396.7	675.77/645.2/623.98	396.7	645.2	0.70032	528.69	1366.8	6.7218	1	8.9754e-12	1.7951e-11	1.6354e-08	TRUE
BRUGEN01896	BST2	248.78/219.74/277.38	443.06/268.35/452.08	248.78	443.06	0.83009	830.57	838.96	6.7074	1	9.9033e-12	1.9807e-11	1.7835e-08	TRUE
BRUGEN56152	DUSP27	324.32/310.16/303.9	551.79/344.88/528.06	310.16	528.06	0.76575	119.89	1056.6	6.7033	1	1.0186e-11	2.0373e-11	1.8134e-08	TRUE
BRUGEN57632	DNTTIP1	543.9/489.95/448.7	751.98/861.24/763.59	489.95	763.59	0.63911	2305.6	1704.7	6.6276	1	1.7061e-11	3.4122e-11	2.9994e-08	TRUE
BRUGEN21599	FZD6	134.97/89.369/96.879	327.22/214.1/75.98	96.879	214.1	1.1359	753.53	313.01	6.6255	1	1.7302e-11	3.4603e-11	2.9994e-08	TRUE
BRUGEN39806	NANS	886.35/1053.5/1090.1	675.77/645.2/583.14	1053.5	645.2	-0.70651	14642	3799	6.6244	1.7429e-11	1	3.4859e-11	2.9994e-08	FALSE
BRUGEN32325	NUP160	162.16/130.37/130.53	272.34/267.38/234.59	130.53	267.38	1.0289	500.23	427.45	6.6191	1	1.8071e-11	3.6142e-11	3.0757e-08	TRUE
BRUGEN27924	CORO2B	612.39/622.43/633.28	931.85/903.86/1265.1	622.43	931.85	0.58142	109.35	2189.9	6.6121	1	1.8946e-11	3.7892e-11	3.1895e-08	TRUE
BRUGEN36158	SLCO4A1	632.53/576.17/551.7	872.91/766.3/905.11	576.17	872.91	0.59849	1887.6	2019.8	6.6027	1	2.0185e-11	4.0371e-11	3.3617e-08	TRUE
BRUGEN25145	TP53I11	296.12/182.94/182.54	345.51/423.35/189.95	182.94	345.51	0.91361	6404.6	608.33	6.591	1	2.1847e-11	4.3693e-11	3.5996e-08	TRUE
BRUGEN60784	RNF113B	1065.6/1342.6/1262.5	817.02/708.17/1059	1262.5	817.02	-0.6272	22589	4591.7	6.574	2.4483e-11	1	4.8966e-11	3.9916e-08	FALSE
BRUGEN22927	FADD	655.7/641.36/831.12	970.47/777.92/1152	655.7	970.47	0.56494	15490	2312.5	6.5456	1	2.9627e-11	5.9254e-11	4.7799e-08	TRUE
BRUGEN45555	CNOT6	317.27/317.52/375.28	532.49/437.88/728.45	317.52	532.49	0.74405	1667.9	1082.8	6.5325	1	3.2333e-11	6.4666e-11	5.1627e-08	TRUE
BRUGEN12337	NDUFB7	315.26/344.86/252.91	474.56/528.95/585.04	315.26	528.95	0.74475	2382	1074.8	6.5182	1	3.557e-11	7.1139e-11	5.6215e-08	TRUE
BRUGEN06204	FEN1	82.592/41.005/24.475	133.12/114.31/83.578	41.005	114.31	1.457	1001.4	127.5	6.4924	1	4.2234e-11	8.4468e-11	6.6074e-08	TRUE
BRUGEN47183	PCIF1	492.53/467.87/462.98	707.27/728.52/737	467.87	728.52	0.63774	315.87	1624.4	6.4669	1	5.0023e-11	1.0005e-10	7.7096e-08	TRUE
BRUGEN76343	LOC101927572	656.7/680.26/595.55	345.51/411.73/310.57	656.7	345.51	-0.92456	2147.1	2316.2	6.4661	5.0275e-11	1	1.0055e-10	7.7096e-08	FALSE
BRUGEN13966	PIK3C3	793.69/692.88/519.07	538.58/372.98/369.45	692.88	372.98	-0.89173	20186	2449.9	6.463	5.1326e-11	1	1.0265e-10	7.7936e-08	FALSE
BRUGEN10295	IPO5	470.37/491.01/407.91	209.34/248.97/134.86	470.37	209.34	-1.1642	2163.3	1633.5	6.4586	5.283e-11	1	1.0566e-10	7.9441e-08	FALSE
BRUGEN04085	CSNK2A1	528.79/580.37/519.07	622.93/806.02/945.95	528.79	806.02	0.60718	1377.8	1846.4	6.4518	1	5.526e-11	1.1052e-10	8.2297e-08	TRUE
BRUGEN07783	ARHGAP35	524.76/578.27/427.29	241.85/314.85/248.83	524.76	248.83	-1.0734	6182.1	1831.6	6.4472	5.6955e-11	1	1.1391e-10	8.4012e-08	FALSE
BRUGEN48212	RFX7	561.02/703.39/684.27	868.85/999.77/1094.1	684.27	999.77	0.54636	7778.6	2418.1	6.4159	1	7.0006e-11	1.4001e-10	1.0229e-07	TRUE
BRUGEN00791	ANGPT2	1011.2/1075.6/1081	890.19/1514.2/1475	1075.6	1475	0.45518	2084.4	3882.4	6.4094	1	7.3029e-11	1.4606e-10	1.0571e-07	TRUE
BRUGEN15270	PSMD10	1114/1089.3/881.09	687.96/930.99/548.95	1089.3	687.96	-0.66216	21971	3934.1	6.3979	7.8788e-11	1	1.5758e-10	1.1299e-07	FALSE
BRUGEN04065	CSNK1A1	104.75/90.421/86.681	216.45/199.57/137.71	90.421	199.57	1.1335	109.66	291.24	6.3956	1	7.9934e-11	1.5987e-10	1.1358e-07	TRUE
BRUGEN41837	SMG8	598.29/619.28/592.49	891.2/1006.6/852.87	598.29	891.2	0.57413	237.09	2101.1	6.3904	1	8.2729e-11	1.6546e-10	1.1648e-07	TRUE
BRUGEN39174	LUC7L2	467.35/421.61/357.94	177.83/241.22/133.91	421.61	177.83	-1.2407	3072.7	1456.7	6.3871	8.4532e-11	1	1.6906e-10	1.1795e-07	FALSE
BRUGEN04043	CSH2	139/139.84/148.89	276.41/197.63/302.02	139.84	276.41	0.97797	41.319	459.35	6.3721	1	9.325e-11	1.865e-10	1.2895e-07	TRUE
BRUGEN47946	CCDC136	503.61/766.47/523.15	663.58/795.36/808.23	523.15	795.36	0.60345	29794	1825.7	6.3707	1	9.4084e-11	1.8817e-10	1.2896e-07	TRUE
BRUGEN38265	TBC1D7	635.55/762.27/823.98	1093.4/1092.8/1140.6	762.27	1093.4	0.51991	9932.8	2707.4	6.3645	1	9.7978e-11	1.9596e-10	1.3311e-07	TRUE
BRUGEN43710	CMAS	587.21/567.76/643.48	303.84/299.35/236.49	587.21	299.35	-0.96968	1772.6	2060.3	6.3417	1.1363e-10	1	2.2725e-10	1.5303e-07	FALSE
BRUGEN35268	OR2T1	463.32/496.26/453.8	210.35/278.04/147.21	463.32	210.35	-1.1355	587.92	1607.9	6.3087	1.4071e-10	1	2.8142e-10	1.8787e-07	FALSE
BRUGEN53909	USP38	1.0072/2.1028/1.0198	8.1296/12.594/11.397	1.0198	11.397	2.6177	0.58655	2.7109	6.3026	1	1.9984e-10	3.9967e-10	2.5579e-07	TRUE
BRUGEN40764	ANKRD49	437.13/269.16/212.11	523.34/459.2/373.25	269.16	459.2	0.76844	15734	910.96	6.2964	1	1.5233e-10	3.0466e-10	2.0165e-07	TRUE
BRUGEN24060	DGKI	1055.6/1330/1192.1	1322.1/714.95/778.79	1192.1	778.79	-0.61359	18833	4324	6.2858	1.6312e-10	1	3.2624e-10	2.1411e-07	FALSE
BRUGEN12131	MYO9B	755.41/653.97/633.28	1002/871.89/954.49	653.97	954.49	0.54481	5358.9	2306.2	6.2579	1	1.951e-10	3.902e-10	2.5393e-07	TRUE
BRUGEN16678	RTN2	653.68/583.53/585.36	868.85/542.51/873.77	585.36	868.85	0.56899	2336	2053.6	6.2559	1	1.9763e-10	3.9527e-10	2.5508e-07	TRUE
BRUGEN47207	DMRTC1	615.41/617.17/477.26	467.45/324.54/283.02	615.41	324.54	-0.92106	9544.3	2164	6.2527	2.017e-10	1	4.034e-10	2.5606e-07	FALSE
BRUGEN57222	TMEM132B	343.46/284.93/353.86	784.5/557.04/451.13	343.46	557.04	0.69604	1767	1175.5	6.2294	1	2.3405e-10	4.681e-10	2.9472e-07	TRUE
BRUGEN36499	NXT1	115.83/111.45/109.12	216.45/234.44/229.84	111.45	229.84	1.0376	12.316	362.36	6.2193	1	2.4967e-10	4.9934e-10	3.11e-07	TRUE
BRUGEN21463	RBM10	267.92/200.82/193.76	374.98/351.66/361.85	200.82	361.85	0.84633	2276.2	670.61	6.2185	1	2.51e-10	5.02e-10	3.11e-07	TRUE
BRUGEN64974	DNAJC18	333.39/510.98/334.49	544.68/335.19/577.44	334.49	544.68	0.70179	15576	1143.4	6.216	1	2.5495e-10	5.0991e-10	3.134e-07	TRUE
BRUGEN46346	NCOA5	562.03/582.48/567	814.99/843.8/863.32	567	843.8	0.57272	132.16	1986.2	6.2109	1	2.6342e-10	5.2684e-10	3.2125e-07	TRUE
BRUGEN58822	LSM12	493.54/426.87/442.59	201.21/199.57/132.96	442.59	199.57	-1.1451	1421.4	1532.7	6.2075	2.6914e-10	1	5.3828e-10	3.2566e-07	FALSE
BRUGEN64419	ZFC3H1	378.71/293.34/305.93	105.68/111.41/75.03	305.93	105.68	-1.5246	2727.6	1041.5	6.2049	2.736e-10	1	5.472e-10	3.2849e-07	FALSE
BRUGEN57023	CMTM1	502.6/476.29/450.74	728.61/575.45/732.25	476.29	728.61	0.61228	672.43	1655	6.2025	1	2.7786e-10	5.5572e-10	3.3104e-07	TRUE
BRUGEN61473	GCOM1	244.75/171.38/144.81	343.47/208.29/319.11	171.38	319.11	0.893	3044.9	568.18	6.1978	1	2.8621e-10	5.7241e-10	3.3838e-07	TRUE
BRUGEN48674	C19orf43	380.73/354.32/388.54	471.51/604.51/610.69	380.73	604.51	0.66562	379.09	1309.3	6.1846	1	3.1124e-10	6.2247e-10	3.6519e-07	TRUE
BRUGEN04084	CSNK2A1	487.49/452.1/528.25	741.82/713.02/775.94	487.49	741.82	0.60468	1456.7	1695.7	6.1762	1	3.2838e-10	6.5676e-10	3.8241e-07	TRUE
BRUGEN08996	NDST1	1173.4/942.06/990.21	1358.7/1282.7/1399.9	990.21	1358.7	0.45598	17940	3560.4	6.1748	1	3.3118e-10	6.6235e-10	3.8279e-07	TRUE
BRUGEN48210	RFX7	631.52/683.41/676.12	831.25/976.52/1031.4	676.12	976.52	0.52972	1020.8	2388	6.1474	1	3.9373e-10	7.8746e-10	4.5171e-07	TRUE
BRUGEN27357	USPL1	386.77/479.44/581.28	273.36/228.63/211.79	479.44	228.63	-1.065	9479.1	1666.4	6.144	4.024e-10	1	8.048e-10	4.5827e-07	FALSE
BRUGEN20656	ZNF131	194.39/218.69/112.18	335.34/350.69/353.3	194.39	350.69	0.84795	3675	648.19	6.1392	1	4.1459e-10	8.2918e-10	4.6751e-07	TRUE
BRUGEN71310	PLSCR5	492.53/411.1/578.22	744.87/190.85/238.39	492.53	238.39	-1.0438	6986.6	1714.1	6.1385	4.1655e-10	1	8.331e-10	4.6751e-07	FALSE
BRUGEN22520	OASL	1087.8/956.78/1153.4	1472.5/1043.4/1501.5	1087.8	1472.5	0.43649	10733	3928.6	6.1373	1	4.1972e-10	8.3944e-10	4.6767e-07	TRUE
BRUGEN24749	SNRNP40	335.4/300.7/272.28	495.9/506.67/470.12	300.7	495.9	0.71984	1005.9	1022.9	6.1033	1	5.1938e-10	1.0388e-09	5.7459e-07	TRUE
BRUGEN41609	XKR8	730.23/722.31/1058.5	841.41/1069.5/1039	730.23	1039	0.50821	53923	2588.4	6.0694	1	6.4178e-10	1.2836e-09	7.0303e-07	TRUE
BRUGEN38960	ZC3HC1	196.41/171.38/159.09	316.04/297.41/348.56	171.38	316.04	0.87907	388.76	568.18	6.0687	1	6.4456e-10	1.2891e-09	7.0303e-07	TRUE
BRUGEN11813	MT1E	435.12/354.32/347.75	562.97/508.6/606.89	354.32	562.97	0.66649	3285.5	1214.5	5.9872	1	1.0671e-09	2.1342e-09	1.1558e-06	TRUE
BRUGEN69562	RSPO4	200.44/213.43/198.86	328.23/355.54/355.2	200.44	355.2	0.82239	85.735	669.27	5.9825	1	1.0989e-09	2.1977e-09	1.1819e-06	TRUE
BRUGEN33398	EDC4	897.43/900/796.45	1233.7/1236.2/1347.7	897.43	1236.2	0.46155	5101.7	3211.9	5.9767	1	1.1384e-09	2.2768e-09	1.216e-06	TRUE
BRUGEN05812	ESRRB	1637.7/1289/1578.6	874.94/1219.7/1124.5	1578.6	1124.5	-0.48902	43682	5802.5	5.9617	1.2482e-09	1	2.4964e-09	1.3241e-06	FALSE
BRUGEN40784	GON4L	513.68/614.02/506.83	262.18/446.6/192.8	513.68	262.18	-0.96763	5057.5	1791.2	5.9425	1.4035e-09	1	2.8069e-09	1.4787e-06	FALSE
BRUGEN46567	RPRD1B	350.51/258.65/232.51	505.05/397.2/434.03	258.65	434.03	0.74458	4561.2	873.77	5.9334	1	1.484e-09	2.968e-09	1.553e-06	TRUE
BRUGEN61888	SIX5	711.09/819.04/641.44	389.2/413.66/521.41	711.09	413.66	-0.78012	8252.2	2517.4	5.928	1.5336e-09	1	3.0672e-09	1.5941e-06	FALSE
BRUGEN11879	MYO1F	660.73/665.54/297.78	709.3/374.91/297.27	660.73	374.91	-0.81585	65880	2331.1	5.9198	1.6115e-09	1	3.2229e-09	1.6639e-06	FALSE
BRUGEN64282	ZNF675	186.33/152.45/162.15	386.15/298.38/150.06	162.15	298.38	0.87583	339.53	536.22	5.8833	1	2.0108e-09	4.0217e-09	2.0625e-06	TRUE
BRUGEN21396	NCOA3	156.12/193.46/146.85	289.62/289.66/230.79	156.12	289.62	0.88726	740.1	515.4	5.8803	1	2.0473e-09	4.0946e-09	2.0861e-06	TRUE
BRUGEN40979	FOCAD	384.76/450/389.56	604.64/488.26/605.94	389.56	604.64	0.63292	1838.3	1341.1	5.8732	1	2.1376e-09	4.2752e-09	2.1639e-06	TRUE
BRUGEN28487	SLC35A1	242.74/151.4/217.21	57.923/95.908/59.834	217.21	59.834	-1.8428	2491.3	727.96	5.833	2.7216e-09	1	5.4433e-09	2.7372e-06	FALSE
BRUGEN29583	MORF4L1	898.44/748.6/729.14	1026.4/1049.2/1071.3	748.6	1049.2	0.48644	11415	2656.6	5.8317	1	2.7428e-09	5.4855e-09	2.7407e-06	TRUE
BRUGEN08997	NDST1	474.4/458.41/465.02	698.13/710.11/686.67	465.02	698.13	0.58516	65.807	1614	5.8022	1	3.2716e-09	6.5432e-09	3.2432e-06	TRUE
BRUGEN16865	CLEC11A	1078.7/1050.4/1169.7	779.42/1631.4/1440.8	1078.7	1440.8	0.41717	4539.7	3894.3	5.8014	1	3.2876e-09	6.5751e-09	3.2432e-06	TRUE
BRUGEN30238	CDC37	134.97/201.87/150.93	279.45/277.07/430.23	150.93	279.45	0.88438	1424.9	497.5	5.7623	1	4.149e-09	8.2979e-09	4.0671e-06	TRUE
BRUGEN71235	BOLA3	162.16/138.79/131.55	265.23/261.57/183.3	138.79	261.57	0.90948	299.39	455.74	5.7515	1	4.4232e-09	8.8465e-09	4.3087e-06	TRUE
BRUGEN40391	GTPBP2	273.96/288.08/321.23	460.34/467.92/468.22	288.08	467.92	0.69784	649.07	978.05	5.7502	1	4.4564e-09	8.9129e-09	4.3139e-06	TRUE
BRUGEN14599	PPP1R8	264.9/324.88/377.32	134.14/271.26/56.035	324.88	134.14	-1.2699	3173.9	1109.1	5.7276	5.0946e-09	1	1.0189e-08	4.901e-06	FALSE
BRUGEN43575	PSENEN	488.5/399.53/445.64	670.69/556.07/670.52	445.64	670.52	0.5883	1981.4	1543.7	5.7234	1	5.2208e-09	1.0442e-08	4.9914e-06	TRUE
BRUGEN21067	ALDH5A1	98.707/60.981/62.207	147.35/61.033/142.46	62.207	142.46	1.1825	666.89	197.04	5.7174	1	5.4087e-09	1.0817e-08	5.1393e-06	TRUE
BRUGEN59145	NR2C2AP	484.47/500.47/452.78	922.71/672.33/718.96	484.47	718.96	0.56853	630	1684.7	5.7128	1	5.5562e-09	1.1112e-08	5.2473e-06	TRUE
BRUGEN60881	ZBTB46	539.87/535.16/528.25	659.51/789.55/781.64	535.16	781.64	0.54567	34.983	1869.7	5.7002	1	5.9823e-09	1.1965e-08	5.6115e-06	TRUE
BRUGEN08223	HBZ	617.42/435.28/400.77	656.46/760.48/326.71	435.28	656.46	0.59165	17183	1506.2	5.6991	1	6.0214e-09	1.2043e-08	5.6115e-06	TRUE
BRUGEN71728	OR6X1	194.39/148.25/146.85	228.64/274.16/313.42	148.25	274.16	0.88257	1065.6	488.27	5.6983	1	6.0505e-09	1.2101e-08	5.6115e-06	TRUE
BRUGEN48126	KLC2	1126.1/1036.7/1010.6	1272.3/1402.8/1384.7	1036.7	1384.7	0.41728	4334.7	3735.5	5.6945	1	6.1861e-09	1.2372e-08	5.6307e-06	TRUE
BRUGEN44657	ENY2	50.361/34.696/55.068	121.94/155/97.824	50.361	121.94	1.2593	133.77	158.02	5.6944	1	6.191e-09	1.2382e-08	5.6307e-06	TRUE
BRUGEN12527	NFIC	329.36/277.57/225.37	452.21/372.98/559.4	277.57	452.21	0.70213	2703.4	940.75	5.6937	1	6.2142e-09	1.2428e-08	5.6307e-06	TRUE
BRUGEN56172	ZNF461	481.45/478.39/517.03	714.39/582.23/750.3	481.45	714.39	0.56835	637.68	1673.8	5.6937	1	6.2167e-09	1.2433e-08	5.6307e-06	TRUE
BRUGEN17706	SLC22A2	426.05/401.64/477.26	568.05/644.23/665.77	426.05	644.23	0.59541	1609.1	1472.8	5.6852	1	6.5339e-09	1.3068e-08	5.8836e-06	TRUE
BRUGEN50183	C11orf63	379.72/343.81/299.82	620.9/538.64/531.86	343.81	538.64	0.64619	1612.5	1176.8	5.6794	1	6.7584e-09	1.3517e-08	6.0506e-06	TRUE
BRUGEN43848	SMG9	28.202/29.439/37.732	83.328/82.345/89.276	29.439	83.328	1.4701	35.149	90.213	5.6737	1	6.9955e-09	1.3991e-08	6.2269e-06	TRUE
BRUGEN48424	UPF3B	632.53/649.77/723.03	925.75/865.11/921.25	649.77	921.25	0.50302	2831.9	2290.6	5.6724	1	7.0407e-09	1.4081e-08	6.2313e-06	TRUE
BRUGEN43713	CMAS	329.36/438.44/431.37	212.38/240.26/201.35	431.37	212.38	-1.0188	5227.8	1492	5.6692	7.1736e-09	1	1.4347e-08	6.3128e-06	FALSE
BRUGEN22926	FADD	90.649/85.164/118.29	167.67/189.88/187.1	90.649	187.1	1.0373	397.18	292.01	5.6443	1	8.2944e-09	1.6589e-08	7.2579e-06	TRUE
BRUGEN64568	GGN	1119/986.22/994.29	1244.8/1331.1/1453.1	994.29	1331.1	0.42051	7811.1	3575.7	5.6324	1	8.8863e-09	1.7773e-08	7.7322e-06	TRUE
BRUGEN23022	SUCLG2	258.85/215.54/210.08	366.85/380.73/366.6	215.54	366.85	0.76449	953.08	722.09	5.6308	1	8.9701e-09	1.794e-08	7.7615e-06	TRUE
BRUGEN48994	PPDPF	768.51/602.45/662.86	933.88/1023/812.03	662.86	933.88	0.49391	7404.9	2339	5.604	1	1.0473e-08	2.0946e-08	9.0117e-06	TRUE
BRUGEN64589	FAM129C	441.16/558.3/400.77	677.8/613.23/660.07	441.16	660.07	0.58024	7675.8	1527.5	5.6012	1	1.0644e-08	2.1287e-08	9.1078e-06	TRUE
BRUGEN60864	GATA5	604.33/729.67/606.77	690/865.11/933.6	606.77	865.11	0.51103	7555.7	2132.2	5.5947	1	1.1051e-08	2.2102e-08	9.4046e-06	TRUE
BRUGEN45091	APMAP	451.23/459.46/449.72	539.6/684.92/672.42	451.23	672.42	0.57444	35.013	1564	5.593	1	1.1162e-08	2.2324e-08	9.447e-06	TRUE
BRUGEN02036	C9	1415.1/1325.8/1206.4	1714.3/1603.3/1748.5	1325.8	1714.3	0.37051	11119	4833.1	5.5883	1	1.1466e-08	2.2932e-08	9.6516e-06	TRUE
BRUGEN18651	TAF5	822.89/740.19/842.34	520.29/595.79/391.29	822.89	520.29	-0.66037	3609.2	2933.2	5.5873	1.1531e-08	1	2.3063e-08	9.6541e-06	FALSE
BRUGEN11622	MMP13	206.48/186.1/186.62	227.63/338.1/325.76	186.62	325.76	0.80043	197.32	621.12	5.5831	1	1.1816e-08	2.3632e-08	9.8393e-06	TRUE
BRUGEN18659	TAF7	925.63/918.93/1025.9	1303.8/1246.8/1238.5	925.63	1246.8	0.42933	5049.5	3317.7	5.5761	1	1.23e-08	2.46e-08	1.0188e-05	TRUE
BRUGEN50879	RNF34	317.27/237.62/236.59	346.52/395.26/651.52	237.62	395.26	0.73174	3173	799.62	5.5748	1	1.2393e-08	2.4785e-08	1.021e-05	TRUE
BRUGEN38888	C11orf73	116.84/74.65/80.563	120.93/176.32/170	80.563	170	1.068	675.39	258.15	5.5668	1	1.2972e-08	2.5943e-08	1.063e-05	TRUE
BRUGEN05201	E2F1	103.74/79.907/92.8	191.04/174.38/189	92.8	189	1.0183	143	299.25	5.561	1	1.3411e-08	2.6822e-08	1.0932e-05	TRUE
BRUGEN38958	ZC3HC1	368.64/464.72/466.04	677.8/687.83/752.2	464.72	687.83	0.56468	4616.5	1612.9	5.5552	1	1.3862e-08	2.7725e-08	1.1241e-05	TRUE
BRUGEN12850	NRF1	380.73/332.24/286.56	451.19/519.26/540.4	332.24	519.26	0.64266	2218.9	1135.4	5.5502	1	1.4269e-08	2.8537e-08	1.151e-05	TRUE
BRUGEN38772	YTHDF2	154.1/146.15/163.17	190.03/279.01/296.32	154.1	279.01	0.85222	72.724	508.45	5.5392	1	1.5194e-08	3.0388e-08	1.2137e-05	TRUE
BRUGEN12734	NOTCH3	229.65/232.36/285.54	387.17/279.01/402.69	232.36	387.17	0.73413	1417.7	781.13	5.5391	1	1.5203e-08	3.0405e-08	1.2137e-05	TRUE
BRUGEN56096	GGTLC1	239.72/234.46/239.65	323.15/423.35/396.04	239.65	396.04	0.72237	13.448	806.77	5.5061	1	1.8341e-08	3.6681e-08	1.4567e-05	TRUE
BRUGEN46935	AGBL5	373.68/522.55/686.31	468.47/287.72/259.28	522.55	287.72	-0.85863	24491	1823.6	5.499	1.9102e-08	1	3.8203e-08	1.5071e-05	FALSE
BRUGEN24649	TM9SF2	334.4/317.52/346.73	520.29/430.13/582.19	334.4	520.29	0.63623	218.34	1143.1	5.4983	1	1.917e-08	3.834e-08	1.5071e-05	TRUE
BRUGEN38562	FZR1	748.36/636.1/746.48	1029.4/929.05/1119.7	746.48	1029.4	0.46311	6093.8	2648.7	5.4974	1	1.9274e-08	3.8547e-08	1.5076e-05	TRUE
BRUGEN62021	SAMD11	1032.4/1313.2/1166.6	811.94/810.86/773.09	1166.6	810.86	-0.52428	19751	4227.2	5.4719	2.2257e-08	1	4.4514e-08	1.7323e-05	FALSE
BRUGEN53932	DGAT2	164.18/132.48/140.73	258.11/268.35/167.16	140.73	258.11	0.87044	308.92	462.42	5.4587	1	2.3977e-08	4.7953e-08	1.8557e-05	TRUE
BRUGEN39425	RTEL1	317.27/264.95/225.37	465.42/356.51/428.33	264.95	428.33	0.69093	2152	896.07	5.458	1	2.4083e-08	4.8166e-08	1.8557e-05	TRUE
BRUGEN54241	LMNB2	269.93/218.69/231.49	404.45/348.76/383.7	231.49	383.7	0.72655	820.84	778.07	5.4566	1	2.4267e-08	4.8534e-08	1.8607e-05	TRUE
BRUGEN75452	DPH3P1	749.37/711.8/797.47	1030.4/1060.8/976.34	749.37	1030.4	0.45897	1862.6	2659.4	5.45	1	2.5185e-08	5.037e-08	1.9141e-05	TRUE
BRUGEN48676	C19orf43	621.45/548.83/512.95	796.7/787.61/734.15	548.83	787.61	0.52032	3280.5	1919.7	5.4498	1	2.5212e-08	5.0423e-08	1.9141e-05	TRUE
BRUGEN45556	CNOT6	317.27/315.42/327.35	465.42/496.01/497.67	317.27	496.01	0.64301	52.491	1081.9	5.4339	1	2.7562e-08	5.5124e-08	2.0824e-05	TRUE
BRUGEN68644	KRTAP19-2	675.84/853.74/413.01	288.6/410.76/474.87	675.84	410.76	-0.71702	50364	2386.9	5.4258	2.8855e-08	1	5.7709e-08	2.1695e-05	FALSE
BRUGEN58306	CCDC38	207.49/218.69/214.15	375.99/359.41/318.16	214.15	359.41	0.74428	32.526	717.25	5.4239	1	2.9159e-08	5.8317e-08	2.1817e-05	TRUE
BRUGEN20668	ZNF134	923.62/1094.5/915.76	860.72/1423.1/1235.6	923.62	1235.6	0.41947	14633	3310.1	5.423	1	2.931e-08	5.862e-08	2.1825e-05	TRUE
BRUGEN59133	OR1I1	352.53/288.08/323.27	528.42/375.88/503.36	323.27	503.36	0.63727	1046.9	1103.3	5.4218	1	2.9503e-08	5.9006e-08	2.1863e-05	TRUE
BRUGEN02983	CDX1	314.25/305.96/262.08	480.66/408.82/561.3	305.96	480.66	0.64997	996.87	1041.6	5.4131	1	3.0975e-08	6.1949e-08	2.2845e-05	TRUE
BRUGEN21100	NELFE	64.462/43.108/38.752	105.68/65.876/111.12	43.108	105.68	1.2743	237.49	134.34	5.3991	1	3.35e-08	6.7e-08	2.459e-05	TRUE
BRUGEN01130	ARHGAP4	153.1/154.56/167.24	295.71/276.1/246.93	154.56	276.1	0.83297	81.557	510.01	5.382	1	3.6837e-08	7.3673e-08	2.6889e-05	TRUE
BRUGEN42101	WDR41	164.18/151.4/137.67	285.55/265.44/271.63	151.4	271.63	0.83904	175.86	499.13	5.3813	1	3.6979e-08	7.3958e-08	2.6889e-05	TRUE
BRUGEN16441	RPL38	140/116.71/107.08	221.53/222.82/159.56	116.71	221.53	0.91882	317.73	380.24	5.3757	1	3.8146e-08	7.6292e-08	2.7608e-05	TRUE
BRUGEN14129	PLCG1	590.23/663.44/586.37	834.3/809.89/928.85	590.23	834.3	0.49857	2687.1	2071.4	5.3626	1	4.1016e-08	8.2033e-08	2.9547e-05	TRUE
BRUGEN39177	LUC7L2	316.27/317.52/302.88	140.24/218.94/122.52	316.27	140.24	-1.1676	90.441	1078.3	5.3605	4.1487e-08	1	8.2974e-08	2.9665e-05	FALSE
BRUGEN38771	YTHDF2	157.13/168.22/137.67	245.92/310.98/279.22	157.13	279.22	0.82551	250.84	518.88	5.3602	1	4.1563e-08	8.3126e-08	2.9665e-05	TRUE
BRUGEN15300	PTBP1	261.88/212.38/199.88	363.8/251.88/355.2	212.38	355.2	0.73926	1302.9	711.05	5.356	1	4.2536e-08	8.5072e-08	3.0124e-05	TRUE
BRUGEN23175	HCAR3	244.75/240.77/219.25	393.27/421.42/217.49	240.77	393.27	0.70553	239.45	810.73	5.3558	1	4.2595e-08	8.519e-08	3.0124e-05	TRUE
BRUGEN67911	SLC9C2	913.54/908.41/864.78	602.6/1197.4/603.09	908.41	603.09	-0.59018	965.28	3253.1	5.3532	4.32e-08	1	8.64e-08	3.0413e-05	FALSE
BRUGEN21324	NPRL3	288.06/309.11/283.5	455.26/410.76/484.37	288.06	455.26	0.65846	231.95	977.98	5.3463	1	4.4891e-08	8.9783e-08	3.1461e-05	TRUE
BRUGEN12940	NUP98	119.86/84.112/97.899	199.17/192.79/159.56	97.899	192.79	0.97043	336.15	316.45	5.334	1	4.8049e-08	9.6099e-08	3.3417e-05	TRUE
BRUGEN06585	FRG1	189.36/111.45/142.77	282.5/201.5/258.33	142.77	258.33	0.85103	1575.7	469.42	5.3337	1	4.8113e-08	9.6227e-08	3.3417e-05	TRUE
BRUGEN00290	ADCY5	661.74/640.3/635.32	893.24/989.11/592.64	640.3	893.24	0.47965	242.14	2255.7	5.3255	1	5.0346e-08	1.0069e-07	3.4811e-05	TRUE
BRUGEN22248	API5	642.6/731.78/665.92	418.67/407.85/363.75	665.92	407.85	-0.70593	2440.5	2350.3	5.3232	5.0985e-08	1	1.0197e-07	3.5044e-05	FALSE
BRUGEN22358	KHSRP	203.46/154.56/163.17	309.94/239.29/286.82	163.17	286.82	0.81003	848.79	539.74	5.3226	1	5.1136e-08	1.0227e-07	3.5044e-05	TRUE
BRUGEN11540	MAP3K11	501.59/453.16/449.72	740.81/567.7/663.87	453.16	663.87	0.54989	1179	1571	5.3164	1	5.2932e-08	1.0586e-07	3.6116e-05	TRUE
BRUGEN03997	CS	201.44/172.43/140.73	336.36/299.35/200.4	172.43	299.35	0.79229	923.32	571.83	5.3076	1	5.5542e-08	1.1108e-07	3.7608e-05	TRUE
BRUGEN00715	AMD1	194.39/180.84/179.48	310.96/318.73/245.98	180.84	310.96	0.77866	92.74	601.02	5.3074	1	5.5605e-08	1.1121e-07	3.7608e-05	TRUE
BRUGEN47185	PCIF1	1182.5/1044/1171.7	1182.9/1516.1/1603.2	1171.7	1516.1	0.37147	8209.5	4246.6	5.2849	1	6.288e-08	1.2576e-07	4.2344e-05	TRUE
BRUGEN40122	DDX4	381.73/392.17/418.11	586.35/579.32/619.23	392.17	586.35	0.57904	390.85	1350.5	5.2837	1	6.3301e-08	1.266e-07	4.2407e-05	TRUE
BRUGEN41176	TTC12	438.14/423.72/399.75	679.84/552.2/625.88	423.72	625.88	0.5617	391.08	1464.4	5.2831	1	6.3522e-08	1.2704e-07	4.2407e-05	TRUE
BRUGEN28486	SLC35A1	441.16/492.06/392.62	234.74/258.66/161.46	441.16	234.74	-0.90736	2473.5	1527.5	5.2815	6.4051e-08	1	1.281e-07	4.2577e-05	FALSE
BRUGEN19935	SLC35A2	422.02/382.71/472.16	220.51/238.32/211.79	422.02	220.51	-0.93334	2029.5	1458.2	5.2769	6.5686e-08	1	1.3137e-07	4.3477e-05	FALSE
BRUGEN59146	NR2C2AP	150.08/116.71/108.1	219.5/216.04/243.13	116.71	219.5	0.90558	593.81	380.24	5.2715	1	6.7672e-08	1.3534e-07	4.4601e-05	TRUE
BRUGEN22325	DENR	146.05/132.48/158.07	349.57/261.57/220.34	146.05	261.57	0.83642	164.3	480.69	5.269	1	6.857e-08	1.3714e-07	4.5001e-05	TRUE
BRUGEN30662	ATXN2L	312.24/247.08/272.28	167.67/112.38/111.12	272.28	112.38	-1.2693	1115.8	922.01	5.2661	6.9661e-08	1	1.3932e-07	4.5524e-05	FALSE
BRUGEN30073	DIDO1	260.87/250.23/250.87	451.19/403.98/369.45	250.87	403.98	0.68518	50.223	846.31	5.2631	1	7.0823e-08	1.4165e-07	4.6089e-05	TRUE
BRUGEN60607	RPP25L	231.66/127.22/128.49	207.3/236.38/243.13	128.49	236.38	0.87433	5322.5	420.47	5.2614	1	7.1471e-08	1.4294e-07	4.6316e-05	TRUE
BRUGEN22359	KHSRP	240.72/218.69/206	325.18/396.23/360.9	218.69	360.9	0.72012	323.31	733.15	5.2522	1	7.5164e-08	1.5033e-07	4.8507e-05	TRUE
BRUGEN52821	TMEM222	203.46/221.85/209.06	274.37/347.79/349.51	209.06	347.79	0.73158	97.471	699.4	5.2459	1	7.7771e-08	1.5554e-07	4.986e-05	TRUE
BRUGEN49970	ARMC5	261.88/232.36/188.66	375.99/470.82/378.95	232.36	378.95	0.70324	1390.5	781.13	5.2449	1	7.8189e-08	1.5638e-07	4.986e-05	TRUE
BRUGEN29714	YWHAQ	448.21/583.53/479.3	265.23/655.86/218.44	479.3	265.23	-0.85127	5915.3	1665.9	5.2448	7.8227e-08	1	1.5645e-07	4.986e-05	FALSE
BRUGEN31230	MAPRE1	549.94/475.23/499.69	718.45/726.58/649.63	499.69	718.45	0.52297	1561.5	1740.2	5.244	1	7.8553e-08	1.5711e-07	4.9863e-05	TRUE
BRUGEN19483	TPD52L2	463.32/504.67/489.5	705.24/911.61/534.71	489.5	705.24	0.52592	457.8	1703	5.2279	1	8.572e-08	1.7144e-07	5.419e-05	TRUE
BRUGEN10767	LPL	631.52/533.06/524.17	681.87/758.55/904.16	533.06	758.55	0.50813	4886.9	1862	5.2256	1	8.6817e-08	1.7363e-07	5.466e-05	TRUE
BRUGEN44142	MRAP	186.33/226.05/214.15	344.49/353.6/409.34	214.15	353.6	0.72083	457.74	717.25	5.2068	1	9.6039e-08	1.9208e-07	6.0221e-05	TRUE
BRUGEN05613	EP300	790.66/771.73/795.43	926.77/1066.6/1178.6	790.66	1066.6	0.43143	190.6	2813	5.2029	1	9.8095e-08	1.9619e-07	6.1263e-05	TRUE
BRUGEN01398	ATP4B	1290.2/1366.8/1110.5	933.88/1050.1/841.47	1290.2	933.88	-0.4659	19078	4697.4	5.1995	9.9937e-08	1	1.9987e-07	6.2163e-05	FALSE
BRUGEN39497	SIX4	543.9/619.28/617.99	366.85/375.88/472.02	617.99	375.88	-0.7158	2745.6	2173.5	5.193	1.0344e-07	1	2.0688e-07	6.4085e-05	FALSE
BRUGEN30109	NUPL2	242.74/242.87/248.83	390.22/391.38/477.72	242.87	391.38	0.68613	17.726	818.13	5.1921	1	1.0398e-07	2.0796e-07	6.4162e-05	TRUE
BRUGEN60752	GPR119	665.77/468.93/594.53	324.17/357.48/552.75	594.53	357.48	-0.7323	10426	2087.3	5.1888	1.0585e-07	1	2.117e-07	6.5055e-05	FALSE
BRUGEN52303	TEX101	893.4/1092.4/1214.6	734.71/767.27/859.52	1092.4	767.27	-0.50915	27263	3946	5.176	1.1336e-07	1	2.2672e-07	6.9398e-05	FALSE
BRUGEN28766	NPRL2	369.65/361.68/433.41	553.83/530.89/617.33	369.65	553.83	0.58199	2064.4	1269.5	5.1693	1	1.1749e-07	2.3499e-07	7.1644e-05	TRUE
BRUGEN31793	CLASP2	1.0072/4.2056/2.0396	8.1296/16.469/14.246	2.0396	14.246	2.3265	2.8788	5.578	5.1684	1	1.4645e-07	2.929e-07	8.5918e-05	TRUE
BRUGEN44295	DIABLO	398.86/412.15/521.11	652.4/599.67/606.89	412.15	606.89	0.55714	6024.3	1422.6	5.1631	1	1.2143e-07	2.4286e-07	7.3755e-05	TRUE
BRUGEN31324	P2RX2	492.53/565.66/290.64	219.5/280.94/279.22	492.53	279.22	-0.81655	23054	1714.1	5.1521	1.2881e-07	1	2.5762e-07	7.7932e-05	FALSE
BRUGEN68446	FOXD4L3	238.71/216.59/176.42	385.14/180.19/355.2	216.59	355.2	0.7111	1051.4	725.78	5.1453	1	1.3356e-07	2.6711e-07	8.0488e-05	TRUE
BRUGEN46566	RPRD1B	126.91/113.55/139.71	231.69/217/247.88	126.91	231.69	0.86331	171.14	415.06	5.1433	1	1.3499e-07	2.6998e-07	8.0908e-05	TRUE
BRUGEN62748	SLC36A2	287.06/369.04/275.34	379.04/447.57/504.31	287.06	447.57	0.63899	3429.5	974.4	5.1422	1	1.3578e-07	2.7155e-07	8.0908e-05	TRUE
BRUGEN62910	C7orf60	802.75/832.71/829.08	1108.7/1083.1/1269.8	829.08	1108.7	0.4188	353.29	2956.3	5.1421	1	1.3582e-07	2.7164e-07	8.0908e-05	TRUE
BRUGEN60734	FOXR2	185.33/170.33/191.72	206.29/312.91/326.71	185.33	312.91	0.75252	132.93	616.62	5.138	1	1.3886e-07	2.7772e-07	8.2249e-05	TRUE
BRUGEN43846	SMG9	410.94/425.82/432.39	622.93/572.54/716.11	425.82	622.93	0.54776	132.21	1472	5.1376	1	1.3913e-07	2.7827e-07	8.2249e-05	TRUE
BRUGEN28905	EBP	499.58/424.77/490.52	278.44/256.72/324.81	490.52	278.44	-0.81471	2202.5	1706.7	5.1335	1.4223e-07	1	2.8447e-07	8.3763e-05	FALSE
BRUGEN21120	AIMP2	534.83/578.27/609.83	899.33/808.92/674.32	578.27	808.92	0.48354	1441.5	2027.6	5.1224	1	1.5087e-07	3.0174e-07	8.8179e-05	TRUE
BRUGEN14666	PPP4C	81.584/41.005/39.772	134.14/98.815/72.181	41.005	98.815	1.2487	824.12	127.5	5.1197	1	1.5302e-07	3.0604e-07	8.8788e-05	TRUE
BRUGEN15589	PXN	621.45/571.96/546.6	825.15/801.17/720.86	571.96	801.17	0.48547	1546.1	2004.4	5.1196	1	1.5306e-07	3.0612e-07	8.8788e-05	TRUE
BRUGEN49414	GALNT14	406.91/539.37/868.85	271.32/517.32/317.21	539.37	317.21	-0.76395	63052	1885	5.1168	1.5539e-07	1	3.1079e-07	8.9805e-05	FALSE
BRUGEN18192	SRMS	271.95/205.02/225.37	395.3/339.07/365.65	225.37	365.65	0.69572	1291.7	756.58	5.1	1	1.6985e-07	3.3971e-07	9.7797e-05	TRUE
BRUGEN30441	ABCB8	73.527/49.416/59.147	138.2/128.85/78.829	59.147	128.85	1.1102	150.73	186.93	5.0979	1	1.7172e-07	3.4343e-07	9.8503e-05	TRUE
BRUGEN20401	YWHAH	397.85/414.25/346.73	339.41/586.11/661.02	397.85	586.11	0.55778	1441.4	1371	5.0844	1	1.8442e-07	3.6885e-07	0.0001054	TRUE
BRUGEN39423	RTEL1	555.98/501.52/492.55	725.56/713.98/704.71	501.52	713.98	0.50873	1523.3	1746.8	5.0835	1	1.8531e-07	3.7062e-07	0.00010552	TRUE
BRUGEN33673	TBC1D22A	1063.6/1156.5/1243.1	908.48/828.3/821.53	1156.5	828.3	-0.4811	8064.7	4189	5.0716	1.9724e-07	1	3.9448e-07	0.0001119	FALSE
BRUGEN27161	EBI3	255.83/266.01/241.69	428.83/372.01/404.59	255.83	404.59	0.6592	151.77	863.84	5.0613	1	2.0816e-07	4.1631e-07	0.00011766	TRUE
BRUGEN46773	PLEKHA1	886.35/972.55/901.49	1188.9/1137.3/1361.9	901.49	1188.9	0.39892	2639.4	3227.1	5.0603	1	2.0934e-07	4.1868e-07	0.0001179	TRUE
BRUGEN21296	PABPN1	341.45/366.94/281.46	149.38/168.57/169.05	341.45	168.57	-1.014	2124.1	1168.3	5.0578	2.1203e-07	1	4.2407e-07	0.00011899	FALSE
BRUGEN64276	NLRP6	162.16/151.4/187.64	251/303.23/279.22	162.16	279.22	0.78028	382.46	536.27	5.0551	1	2.1512e-07	4.3023e-07	0.00012028	TRUE
BRUGEN38773	YTHDF2	254.83/250.23/211.09	304.86/414.63/396.99	250.23	396.99	0.66371	776.48	844.08	5.0514	1	2.1926e-07	4.3852e-07	0.00012215	TRUE
BRUGEN48024	RMND5B	411.95/356.43/247.81	179.87/259.63/156.71	356.43	179.87	-0.98272	7440.5	1222	5.0508	2.2004e-07	1	4.4008e-07	0.00012215	FALSE
BRUGEN39254	ZFR	450.23/412.15/377.32	602.6/566.73/604.99	412.15	602.6	0.54694	1331.4	1422.6	5.0496	1	2.2139e-07	4.4279e-07	0.00012246	TRUE
BRUGEN43772	LIN37	401.88/400.58/452.78	589.39/527.98/678.12	401.88	589.39	0.55133	1296.5	1385.5	5.0377	1	2.3555e-07	4.711e-07	0.00012983	TRUE
BRUGEN56883	CCDC101	518.72/451.05/489.5	697.11/737.23/607.84	489.5	697.11	0.50922	1165.9	1703	5.0309	1	2.4408e-07	4.8816e-07	0.00013405	TRUE
BRUGEN21402	NRIP1	286.05/411.1/277.38	444.08/442.73/359.95	286.05	442.73	0.62838	7856.3	970.83	5.0285	1	2.4714e-07	4.9429e-07	0.00013515	TRUE
BRUGEN50261	CAAP1	161.15/142.99/125.43	252.02/229.6/274.48	142.99	252.02	0.81325	319.09	470.18	5.028	1	2.4781e-07	4.9563e-07	0.00013515	TRUE
BRUGEN34043	CNOT10	690.95/655.02/559.86	528.42/413.66/389.4	655.02	413.66	-0.6618	5173.4	2310	5.0217	2.5603e-07	1	5.1205e-07	0.00013914	FALSE
BRUGEN66782	TCERG1L	551.95/503.62/533.35	749.95/668.45/828.18	533.35	749.95	0.49095	614.87	1863	5.0184	1	2.6054e-07	5.2108e-07	0.00014109	TRUE
BRUGEN37288	GEMIN4	129.93/63.084/70.365	200.19/119.16/145.31	70.365	145.31	1.0357	1800.5	224.11	5.0063	1	2.7738e-07	5.5475e-07	0.00014969	TRUE
BRUGEN57634	DNTTIP1	257.85/241.82/233.53	378.02/403.01/384.65	241.82	384.65	0.66737	162.77	814.43	5.0047	1	2.7982e-07	5.5963e-07	0.00015048	TRUE
BRUGEN26063	GIT2	252.81/188.2/278.4	106.7/168.57/87.377	252.81	106.7	-1.2367	2414.6	853.17	5.0022	2.8336e-07	1	5.6672e-07	0.00015186	FALSE
BRUGEN30736	COPE	31.224/21.028/16.317	41.664/66.845/60.784	21.028	60.784	1.4879	63.074	63.497	4.9891	1	3.0458e-07	6.0915e-07	0.00016267	TRUE
BRUGEN47845	TSPY2	257.85/334.35/208.04	110.77/90.096/146.26	257.85	110.77	-1.2116	4166.7	870.95	4.9838	3.1172e-07	1	6.2345e-07	0.00016591	FALSE
BRUGEN04909	DNASE1L3	410.94/322.78/252.91	104.67/539.61/157.66	322.78	157.66	-1.0291	6327.6	1101.6	4.975	3.2616e-07	1	6.5232e-07	0.000173	FALSE
BRUGEN53836	KRTAP4-4	718.14/845.33/847.44	572.12/839.92/456.83	845.33	572.12	-0.56239	8090.2	3017	4.9741	3.278e-07	1	6.556e-07	0.00017328	FALSE
BRUGEN65284	OR5M3	434.11/419.51/375.28	569.07/621.95/608.79	419.51	608.79	0.53616	1084.7	1449.1	4.9721	1	3.3116e-07	6.6232e-07	0.00017446	TRUE
BRUGEN50611	NAA25	136.98/119.86/76.484	239.82/217.97/133.91	119.86	217.97	0.85742	1087.3	390.99	4.9619	1	3.491e-07	6.9819e-07	0.00018328	TRUE
BRUGEN32643	MAU2	320.29/328.04/327.35	435.95/493.1/496.72	327.35	493.1	0.58958	25.128	1117.9	4.9575	1	3.5709e-07	7.1417e-07	0.00018634	TRUE
BRUGEN05490	ELAVL1	789.66/743.34/755.66	947.09/1087/1012.4	755.66	1012.4	0.42153	653.78	2682.8	4.9573	1	3.5733e-07	7.1466e-07	0.00018634	TRUE
BRUGEN54861	TUBGCP6	428.07/355.37/314.09	542.65/489.23/528.06	355.37	528.06	0.57003	3494.1	1218.2	4.9475	1	3.7582e-07	7.5165e-07	0.00019533	TRUE
BRUGEN34995	OR5L2	464.33/419.51/424.23	616.83/454.35/613.54	424.23	613.54	0.53125	815.01	1466.2	4.9439	1	3.8296e-07	7.6593e-07	0.00019838	TRUE
BRUGEN37689	NOSIP	524.76/512.03/425.25	414.61/303.23/222.24	512.03	303.23	-0.75391	3846.7	1785.2	4.9421	3.8652e-07	1	7.7304e-07	0.00019955	FALSE
BRUGEN06019	FABP6	246.77/244.98/301.86	389.2/335.19/430.23	246.77	389.2	0.65524	1518.9	831.85	4.9385	1	3.9364e-07	7.8728e-07	0.00020255	TRUE
BRUGEN27473	AP3S2	154.1/156.66/175.4	286.57/182.13/268.78	156.66	268.78	0.77496	178.92	517.27	4.9297	1	4.1178e-07	8.2355e-07	0.00021118	TRUE
BRUGEN71062	BLOC1S3	214.54/238.67/210.08	408.51/232.5/346.66	214.54	346.66	0.68973	301.13	718.59	4.9287	1	4.1398e-07	8.2795e-07	0.00021161	TRUE
BRUGEN42222	PPP6R3	51.368/63.084/56.088	148.36/107.53/121.57	56.088	121.57	1.1023	35.613	176.84	4.924	1	4.2406e-07	8.4812e-07	0.00021605	TRUE
BRUGEN15065	PRSS8	716.13/564.6/787.27	685.93/468.88/453.98	716.13	468.88	-0.60993	14011	2536.1	4.9096	4.5632e-07	1	9.1265e-07	0.00023173	FALSE
BRUGEN28507	ARFGEF2	301.16/284.93/340.61	464.4/458.23/390.35	301.16	458.23	0.60391	909.81	1024.5	4.9072	1	4.6189e-07	9.2378e-07	0.00023379	TRUE
BRUGEN40870	BCOR	185.33/198.72/195.8	321.12/255.76/328.61	195.8	321.12	0.71087	59.072	653.09	4.9038	1	4.7001e-07	9.4002e-07	0.00023712	TRUE
BRUGEN21889	BBOX1	226.62/237.62/214.15	416.64/269.32/361.85	226.62	361.85	0.67274	138.17	760.97	4.9021	1	4.7399e-07	9.4798e-07	0.00023835	TRUE
BRUGEN71419	FAM180A	199.43/252.34/186.62	310.96/409.79/325.76	199.43	325.76	0.70515	1481.7	665.76	4.8962	1	4.8848e-07	9.7696e-07	0.00024461	TRUE
BRUGEN62171	CLDN19	885.34/857.95/660.82	824.13/492.14/586.94	857.95	586.94	-0.54689	19805	3064.1	4.8958	4.8958e-07	1	9.7917e-07	0.00024461	FALSE
BRUGEN54200	AGPAT9	1826.1/2434/1812.2	1077.2/1424.1/1601.3	1826.1	1424.1	-0.35848	184880	6758.6	4.8897	5.0486e-07	1	1.0097e-06	0.00025143	FALSE
BRUGEN63946	DCP2	197.41/186.1/166.22	308.92/305.16/307.72	186.1	307.72	0.72249	261.51	619.3	4.8871	1	5.1171e-07	1.0234e-06	0.00025402	TRUE
BRUGEN53189	ATP13A4	271.95/181.89/180.5	321.12/193.75/302.02	181.89	302.02	0.72841	4055.9	604.68	4.8851	1	5.1683e-07	1.0337e-06	0.00025574	TRUE
BRUGEN41799	DNAAF2	338.42/362.73/340.61	528.42/446.6/507.16	340.61	507.16	0.57295	247.19	1165.3	4.8791	1	5.3288e-07	1.0658e-06	0.00026284	TRUE
BRUGEN63869	CHST13	106.76/63.084/68.325	140.24/154.03/86.427	68.325	140.24	1.0266	752.53	217.33	4.8779	1	5.3615e-07	1.0723e-06	0.00026362	TRUE
BRUGEN22250	API5	454.25/468.93/454.82	261.16/313.88/238.39	454.82	261.16	-0.79801	99.612	1577	4.8767	5.3949e-07	1	1.079e-06	0.00026442	FALSE
BRUGEN67253	PGM2L1	346.48/413.2/378.34	413.59/554.14/668.62	378.34	554.14	0.54935	1115.1	1300.7	4.8744	1	5.4561e-07	1.0912e-06	0.00026658	TRUE
BRUGEN61204	UBQLNL	506.63/619.28/495.61	711.34/661.67/741.75	506.63	711.34	0.48879	6405.4	1765.5	4.872	1	5.5244e-07	1.1049e-06	0.00026907	TRUE
BRUGEN61589	ZNF597	37.267/67.29/40.791	95.522/187.94/24.693	40.791	95.522	1.2077	357.3	126.81	4.8603	1	5.8617e-07	1.1723e-06	0.0002846	TRUE
BRUGEN73846	PGA3	345.47/298.6/286.56	435.95/453.38/484.37	298.6	453.38	0.60088	1171.2	1015.4	4.8574	1	5.9454e-07	1.1891e-06	0.00028776	TRUE
BRUGEN27144	CLEC3A	163.17/252.34/211.09	231.69/340.04/345.71	211.09	340.04	0.68522	1998.9	706.54	4.851	1	6.1416e-07	1.2283e-06	0.00029633	TRUE
BRUGEN19628	TSC1	447.2/504.67/477.26	674.75/641.33/718.96	477.26	674.75	0.49871	827.45	1658.5	4.8495	1	6.1879e-07	1.2376e-06	0.00029764	TRUE
BRUGEN76399	C11orf98	478.43/425.82/355.9	611.75/526.04/614.48	425.82	611.75	0.52168	3827.9	1472	4.8462	1	6.2909e-07	1.2582e-06	0.00030166	TRUE
BRUGEN02810	CDC25B	701.02/676.05/674.08	971.48/891.27/912.7	676.05	912.7	0.43246	313.68	2387.7	4.843	1	6.3934e-07	1.2787e-06	0.00030562	TRUE
BRUGEN17352	ST3GAL2	616.42/647.66/406.89	706.26/841.86/1099.8	616.42	841.86	0.44905	22438	2167.7	4.8422	1	6.4217e-07	1.2843e-06	0.00030603	TRUE
BRUGEN54078	COX4I2	807.79/782.24/845.4	1067/854.46/1777.9	807.79	1067	0.40109	1033.6	2876.8	4.8329	1	6.7274e-07	1.3455e-06	0.00031962	TRUE
BRUGEN54827	SYDE1	624.47/528.86/525.19	740.81/587.07/736.05	528.86	736.05	0.47617	4578.1	1846.6	4.8216	1	7.1191e-07	1.4238e-06	0.00033719	TRUE
BRUGEN63387	STOML3	879.3/927.34/1223.7	1392.2/1205.2/860.47	927.34	1205.2	0.37769	45081	3324.1	4.8186	1	7.2301e-07	1.446e-06	0.0003414	TRUE
BRUGEN07899	GSTM3	565.05/454.21/523.15	316.04/317.76/355.2	523.15	317.76	-0.71752	3254.3	1825.7	4.8069	7.6657e-07	1	1.5331e-06	0.00036088	FALSE
BRUGEN39475	RSF1	62.447/75.701/86.681	150.4/90.096/163.36	75.701	150.4	0.98102	148.12	241.89	4.8027	1	7.8266e-07	1.5653e-06	0.00036733	TRUE
BRUGEN75451	DPH3P1	482.46/505.73/549.66	707.27/728.52/677.17	505.73	707.27	0.4831	1236	1762.2	4.8012	1	7.8846e-07	1.5769e-06	0.00036894	TRUE
BRUGEN60913	SAMD10	133.96/127.22/118.29	221.53/229.6/225.09	127.22	225.09	0.81827	62.541	416.12	4.7978	1	8.022e-07	1.6044e-06	0.00037423	TRUE
BRUGEN50237	DCAKD	451.23/546.73/557.82	321.12/418.51/337.16	546.73	337.16	-0.69576	4621.4	1912	4.7928	8.2228e-07	1	1.6446e-06	0.00038245	FALSE
BRUGEN54239	LMNB2	324.32/362.73/294.72	483.71/371.04/492.92	324.32	483.71	0.57525	1176	1107.1	4.7902	1	8.3296e-07	1.6659e-06	0.00038626	TRUE
BRUGEN59134	OR1I1	644.62/712.85/670	820.07/902.89/927.9	670	902.89	0.42985	1240.3	2365.3	4.7887	1	8.3934e-07	1.6787e-06	0.0003873	TRUE
BRUGEN70261	GALNT18	445.19/426.87/428.31	704.22/570.61/612.59	428.31	612.59	0.51525	143.51	1481	4.7885	1	8.4021e-07	1.6804e-06	0.0003873	TRUE
BRUGEN31634	CMTR1	222.59/218.69/191.72	94.506/89.127/35.141	218.69	89.127	-1.2855	371.38	733.15	4.7851	8.5443e-07	1	1.7089e-06	0.00039269	FALSE
BRUGEN37155	TAX1BP3	419/405.84/363.04	199.17/336.16/226.99	405.84	226.99	-0.8355	1002.5	1399.8	4.7804	8.7468e-07	1	1.7494e-06	0.0004008	FALSE
BRUGEN21376	MIA	503.61/568.81/554.76	716.42/765.33/811.08	554.76	765.33	0.4635	1407	1941.4	4.779	1	8.8086e-07	1.7617e-06	0.00040142	TRUE
BRUGEN36053	EIF3K	320.29/301.75/313.07	481.68/362.32/469.17	313.07	469.17	0.58209	90.147	1067	4.7789	1	8.8119e-07	1.7624e-06	0.00040142	TRUE
BRUGEN69077	SLC6A19	463.32/505.73/447.68	686.95/654.89/572.7	463.32	654.89	0.49834	1021.4	1607.9	4.7775	1	8.8732e-07	1.7746e-06	0.00040302	TRUE
BRUGEN25850	SNPH	161.15/150.35/193.76	253.03/271.26/316.26	161.15	271.26	0.74759	589.88	532.79	4.7699	1	9.2137e-07	1.8427e-06	0.00041726	TRUE
BRUGEN54326	ZC3H10	482.46/425.82/397.72	631.06/580.29/608.79	425.82	608.79	0.51468	1998.8	1472	4.769	1	9.2571e-07	1.8514e-06	0.00041728	TRUE
BRUGEN64080	TMEM252	577.13/626.64/580.26	635.12/795.36/868.07	580.26	795.36	0.45425	1080.5	2034.8	4.7685	1	9.2786e-07	1.8557e-06	0.00041728	TRUE
BRUGEN00714	AMD1	250.8/231.31/179.48	350.59/364.26/397.94	231.31	364.26	0.65287	1532.9	777.44	4.7682	1	9.2949e-07	1.859e-06	0.00041728	TRUE
BRUGEN39926	RBM27	553.97/568.81/560.88	360.75/349.73/228.89	560.88	349.73	-0.67992	55.324	1963.8	4.7649	9.4478e-07	1	1.8896e-06	0.00042292	FALSE
BRUGEN40097	CPVL	520.73/497.31/573.12	890.19/723.67/667.67	520.73	723.67	0.47402	1646.4	1816.9	4.761	1	9.6294e-07	1.9259e-06	0.00042858	TRUE
BRUGEN29153	ZNF274	219.57/255.49/209.06	346.52/348.76/358.05	219.57	348.76	0.6651	700.37	736.24	4.761	1	9.6297e-07	1.9259e-06	0.00042858	TRUE
BRUGEN39367	UIMC1	99.714/117.76/77.503	192.06/136.6/185.2	99.714	185.2	0.88659	409.43	322.59	4.7596	1	9.6983e-07	1.9397e-06	0.0004304	TRUE
BRUGEN43495	PAG1	340.44/361.68/297.78	276.41/178.25/166.21	340.44	178.25	-0.92962	1135.7	1164.7	4.7523	1.0057e-06	1	2.0115e-06	0.00044506	FALSE
BRUGEN23166	HDAC3	177.27/119.86/182.54	61.988/112.38/61.733	177.27	61.988	-1.5009	1661.8	588.62	4.7517	1.0088e-06	1	2.0176e-06	0.00044515	FALSE
BRUGEN47641	XPO4	670.81/589.84/573.12	805.84/809.89/743.65	589.84	805.84	0.44953	3417.7	2070	4.7477	1	1.029e-06	2.0579e-06	0.00045274	TRUE
BRUGEN67987	SIRPB2	492.53/485.75/424.23	680.85/743.05/608.79	485.75	680.85	0.48628	1915.3	1689.4	4.7468	1	1.0335e-06	2.067e-06	0.00045346	TRUE
BRUGEN72150	C11orf87	1017.3/748.6/945.34	954.21/1221.6/1371.4	945.34	1221.6	0.36955	21941	3391.6	4.744	1	1.0476e-06	2.0952e-06	0.00045834	TRUE
BRUGEN50157	EPHX3	772.53/669.74/617.99	900.35/827.33/953.54	669.74	900.35	0.42632	6622.2	2364.4	4.7425	1	1.0554e-06	2.1109e-06	0.00045948	TRUE
BRUGEN23357	CPNE1	498.57/469.98/540.48	727.6/533.79/696.16	498.57	696.16	0.4808	1287.2	1736.1	4.7422	1	1.057e-06	2.1139e-06	0.00045948	TRUE
BRUGEN51370	CMIP	521.74/450/501.73	453.22/705.26/699.96	501.73	699.96	0.47954	1538.2	1747.6	4.7418	1	1.0591e-06	2.1182e-06	0.00045948	TRUE
BRUGEN38945	OSER1	674.83/618.23/637.36	874.94/760.48/861.42	637.36	861.42	0.43401	885.15	2244.9	4.7288	1	1.129e-06	2.258e-06	0.00048844	TRUE
BRUGEN12682	NNMT	560.01/630.84/559.86	780.44/710.11/769.29	560.01	769.29	0.45738	2508.5	1960.6	4.7265	1	1.1423e-06	2.2846e-06	0.00049282	TRUE
BRUGEN65300	LRRC55	644.62/474.18/490.52	709.3/525.07/685.72	490.52	685.72	0.48248	12007	1706.7	4.7249	1	1.151e-06	2.3019e-06	0.00049517	TRUE
BRUGEN54508	TMEM209	105.76/80.958/106.06	193.08/161.78/224.14	105.76	193.08	0.86229	307.55	343.04	4.7145	1	1.2115e-06	2.4229e-06	0.00051976	TRUE
BRUGEN21074	BAG6	768.51/774.88/779.11	1106.6/606.45/1021.9	774.88	1021.9	0.39879	29.291	2754.3	4.7072	1	1.2557e-06	2.5114e-06	0.00053725	TRUE
BRUGEN31665	VWA8	518.72/380.61/404.85	555.86/602.58/580.29	404.85	580.29	0.51831	6776.2	1396.2	4.6952	1	1.3318e-06	2.6636e-06	0.00056825	TRUE
BRUGEN49766	PALB2	265.9/151.4/193.76	312.99/325.51/214.64	193.76	312.99	0.68902	3499.6	645.98	4.6911	1	1.3587e-06	2.7174e-06	0.00057812	TRUE
BRUGEN68652	KRTAP19-4	520.73/513.09/468.08	711.34/595.79/713.26	513.09	711.34	0.47055	1041.9	1789	4.6872	1	1.385e-06	2.7701e-06	0.00058772	TRUE
BRUGEN05033	DRD2	395.84/442.64/371.2	584.31/439.82/568.9	395.84	568.9	0.52216	1398.8	1363.7	4.6864	1	1.3901e-06	2.7802e-06	0.00058826	TRUE
BRUGEN60563	C9orf41	504.61/510.98/453.8	682.88/761.45/700.91	504.61	700.91	0.47325	1311.2	1758.1	4.6815	1	1.4236e-06	2.8473e-06	0.00060051	TRUE
BRUGEN33860	NIPBL	83.599/60.981/27.534	126.01/72.658/132.96	60.981	126.01	1.035	815.14	192.99	4.6809	1	1.428e-06	2.8559e-06	0.00060051	TRUE
BRUGEN30644	DUSP12	87.628/88.318/77.503	137.19/170.5/166.21	87.628	166.21	0.91579	51.489	281.84	4.6805	1	1.4307e-06	2.8614e-06	0.00060051	TRUE
BRUGEN36501	NXT1	89.642/89.369/77.503	168.69/200.54/144.36	89.369	168.69	0.90898	70.437	287.7	4.6764	1	1.46e-06	2.92e-06	0.00061115	TRUE
BRUGEN07039	GDF10	0/1.0514/1.0198	11.178/8.7189/1.8995	1.0198	8.7189	2.2666	0.52048	2.7109	4.6761	1	1.9964e-06	3.9928e-06	0.00079897	TRUE
BRUGEN48013	ENGASE	206.48/177.69/220.27	329.25/335.19/251.68	206.48	329.25	0.67058	509.62	690.39	4.6724	1	1.4885e-06	2.9771e-06	0.00061993	TRUE
BRUGEN04122	CST1	434.11/378.51/371.2	555.86/535.73/547.05	378.51	547.05	0.53019	1572.6	1301.3	4.6723	1	1.489e-06	2.9779e-06	0.00061993	TRUE
BRUGEN12492	NFATC2	147.05/136.68/152.97	251/226.69/249.78	147.05	249.78	0.76032	71.265	484.16	4.6688	1	1.5151e-06	3.0302e-06	0.00062911	TRUE
BRUGEN23370	AP1M1	733.25/574.07/585.36	814.99/691.7/796.84	585.36	796.84	0.44432	11001	2053.6	4.6668	1	1.5297e-06	3.0595e-06	0.0006335	TRUE
BRUGEN75820	IQCJ-SCHIP1	675.84/807.48/818.89	552.81/929.05/557.5	807.48	557.5	-0.53365	8729.2	2875.7	4.6616	1.5692e-06	1	3.1383e-06	0.00064809	FALSE
BRUGEN29092	NUP50	260.87/229.21/173.36	398.35/358.45/355.2	229.21	358.45	0.64285	2060.5	770.05	4.6573	1	1.6018e-06	3.2036e-06	0.00065982	TRUE
BRUGEN62621	NEK10	961.89/980.96/998.37	916.61/1332.1/1257.5	980.96	1257.5	0.35793	333.32	3525.6	4.6568	1	1.6061e-06	3.2123e-06	0.00065984	TRUE
BRUGEN44344	KCNK13	1753.6/1820/1804	1404.4/1522.9/1424.6	1804	1424.6	-0.34041	1399.5	6673	4.6442	1.7069e-06	1	3.4138e-06	0.00069938	FALSE
BRUGEN47863	EBF2	606.34/507.83/528.25	701.18/727.55/823.43	528.25	727.55	0.46108	3258	1844.4	4.6407	1	1.7363e-06	3.4727e-06	0.00070957	TRUE
BRUGEN19234	TKT	358.57/346.96/213.13	287.58/174.38/187.1	346.96	187.1	-0.88744	9022.4	1188.1	4.638	1.7593e-06	1	3.5186e-06	0.00071705	FALSE
BRUGEN29470	CPSF4	102.74/57.827/73.424	144.3/144.35/151.01	73.424	144.35	0.96565	551.22	234.3	4.6334	1	1.7984e-06	3.5969e-06	0.00073109	TRUE
BRUGEN28580	MAB21L2	363.6/276.52/313.07	426.8/464.04/496.72	313.07	464.04	0.56626	1944.8	1067	4.6218	1	1.9023e-06	3.8045e-06	0.00077128	TRUE
BRUGEN41693	ELP3	71.512/91.472/38.752	141.25/158.88/60.784	71.512	141.25	0.97214	735.82	227.93	4.6193	1	1.925e-06	3.8499e-06	0.00077785	TRUE
BRUGEN39176	LUC7L2	267.92/289.14/253.93	188/128.85/116.82	267.92	128.85	-1.0504	322.99	906.57	4.6189	1.9285e-06	1	3.8571e-06	0.00077785	FALSE
BRUGEN68745	KCNK18	222.59/201.87/225.37	360.75/348.76/303.92	222.59	348.76	0.64547	218.62	746.83	4.6166	1	1.9506e-06	3.9013e-06	0.00078473	TRUE
BRUGEN28246	SEC23A	395.84/541.47/441.57	294.7/248.97/261.18	441.57	261.18	-0.75534	6036.4	1529	4.6132	1.9823e-06	1	3.9646e-06	0.0007954	FALSE
BRUGEN34557	DCAF4	530.8/779.09/715.89	483.71/460.17/740.8	715.89	483.71	-0.56463	19126	2535.2	4.6112	2.0015e-06	1	4.0031e-06	0.00079898	FALSE
BRUGEN35460	PKD2L2	842.03/705.49/706.71	1013.1/936.8/923.15	706.71	936.8	0.40613	9156.9	2501.2	4.6008	1	2.1048e-06	4.2095e-06	0.00083802	TRUE
BRUGEN31841	N4BP3	498.57/411.1/409.95	584.31/587.07/547.05	411.1	584.31	0.50622	3826.4	1418.8	4.5986	1	2.1265e-06	4.2529e-06	0.00084449	TRUE
BRUGEN60235	AFAP1L1	477.42/539.37/440.55	466.43/664.58/686.67	477.42	664.58	0.47633	2598.8	1659.1	4.5948	1	2.1656e-06	4.3311e-06	0.00085782	TRUE
BRUGEN56791	PRKCDBP	494.54/467.87/433.41	631.06/652.95/689.51	467.87	652.95	0.47998	949.58	1624.4	4.592	1	2.1948e-06	4.3897e-06	0.00086719	TRUE
BRUGEN63945	DCP2	86.62/57.827/60.167	137.19/92.033/123.47	60.167	123.47	1.0249	352.63	190.29	4.5887	1	2.2302e-06	4.4604e-06	0.00087893	TRUE
BRUGEN15861	RASA2	540.87/460.51/480.32	573.13/667.48/712.31	480.32	667.48	0.4739	2029.7	1669.6	4.5805	1	2.3191e-06	4.6383e-06	0.00090944	TRUE
BRUGEN53802	MAP1LC3A	269.93/328.04/237.61	445.09/372.01/408.39	269.93	408.39	0.59554	2210.5	913.7	4.5805	1	2.3194e-06	4.6388e-06	0.00090944	TRUE
BRUGEN45374	ZNF304	178.28/193.46/168.26	308.92/210.22/289.67	178.28	289.67	0.6972	165.36	592.11	4.5779	1	2.3487e-06	4.6975e-06	0.00091863	TRUE
BRUGEN36474	SSU72	214.54/181.89/193.76	320.1/310.01/303.92	193.76	310.01	0.67526	286.26	645.98	4.5738	1	2.395e-06	4.7899e-06	0.00093435	TRUE
BRUGEN30071	DIDO1	923.62/927.34/997.35	1192/1190.6/1102.7	927.34	1190.6	0.3602	2457.5	3324.1	4.5665	1	2.4795e-06	4.9591e-06	0.00096492	TRUE
BRUGEN12532	NFIX	397.85/292.29/269.22	498.95/374.91/435.93	292.29	435.93	0.57508	5837.5	992.99	4.5584	1	2.5776e-06	5.1552e-06	0.0010006	TRUE
BRUGEN64989	GAPT	137.99/94.626/115.24	192.06/203.44/276.38	115.24	203.44	0.81464	471.22	375.24	4.5535	1	2.6378e-06	5.2756e-06	0.0010192	TRUE
BRUGEN23368	AP1M1	343.46/390.07/291.66	433.92/509.57/499.57	343.46	499.57	0.53922	2428	1175.5	4.553	1	2.6439e-06	5.2878e-06	0.0010192	TRUE
BRUGEN49125	IRX1	415.98/636.1/492.55	368.88/681.05/793.04	492.55	681.05	0.46666	13234	1714.2	4.5526	1	2.649e-06	5.2979e-06	0.0010192	TRUE
BRUGEN69078	SLC6A19	406.91/309.11/291.66	469.48/362.32/456.83	309.11	456.83	0.56201	4935	1052.9	4.5524	1	2.652e-06	5.304e-06	0.0010192	TRUE
BRUGEN04862	DNM1	233.67/190.3/170.3	330.26/283.85/304.87	190.3	304.87	0.67704	1140.5	633.94	4.5501	1	2.6808e-06	5.3615e-06	0.0010277	TRUE
BRUGEN30107	NUPL2	53.382/44.159/40.791	97.555/114.31/58.884	44.159	97.555	1.1259	48.207	137.76	4.5493	1	2.6911e-06	5.3822e-06	0.0010291	TRUE
BRUGEN52341	TEKT1	892.39/880.02/825	624.96/605.48/762.64	880.02	624.96	-0.49311	1590.1	3146.7	4.547	2.7214e-06	1	5.4427e-06	0.0010382	FALSE
BRUGEN20196	VSNL1	250.8/216.59/192.74	283.52/339.07/362.8	216.59	339.07	0.64422	869.49	725.78	4.5464	1	2.7289e-06	5.4577e-06	0.0010385	TRUE
BRUGEN52062	PCDH11Y	1443.3/1600.2/1624.5	1148.3/1251.7/1286	1600.2	1251.7	-0.3542	12603	5885.7	4.5437	2.7637e-06	1	5.5275e-06	0.0010491	FALSE
BRUGEN53484	SARNP	372.67/399.53/376.3	196.13/213.13/219.39	376.3	213.13	-0.81723	276.49	1293.4	4.5371	2.8514e-06	1	5.7028e-06	0.0010798	FALSE
BRUGEN28961	CERS1	723.18/629.79/833.16	417.66/494.07/496.72	723.18	494.07	-0.54871	10409	2562.2	4.5262	3.0032e-06	1	6.0063e-06	0.0011345	FALSE
BRUGEN47200	FKBPL	326.34/220.79/212.11	367.86/343.91/262.13	220.79	343.91	0.63701	5607.3	740.52	4.5243	1	3.0291e-06	6.0583e-06	0.0011389	TRUE
BRUGEN31582	ZHX3	198.42/194.51/318.17	288.6/314.85/350.46	198.42	314.85	0.66342	7177.8	662.24	4.5243	1	3.0296e-06	6.0592e-06	0.0011389	TRUE
BRUGEN38341	GOLM1	623.47/691.82/586.37	835.31/598.7/861.42	623.47	835.31	0.42142	3024.3	2193.7	4.5231	1	3.0473e-06	6.0946e-06	0.0011428	TRUE
BRUGEN64599	LCE4A	230.65/193.46/266.16	328.23/356.51/419.79	230.65	356.51	0.62601	1322.2	775.13	4.5205	1	3.0849e-06	6.1699e-06	0.0011541	TRUE
BRUGEN39255	ZFR	503.61/430.02/449.72	628.01/599.67/694.26	449.72	628.01	0.48084	1645.8	1558.5	4.516	1	3.1503e-06	6.3007e-06	0.001174	TRUE
BRUGEN59612	MIR1-1HG	1115/1104/1029	1496.9/1389.2/1357.2	1104	1389.2	0.3313	2874.2	3989.8	4.5158	1	3.1532e-06	6.3065e-06	0.001174	TRUE
BRUGEN75073	KRTAP2-3	558/571.96/544.56	350.59/358.45/397.94	558	358.45	-0.63707	187.76	1953.2	4.5152	3.1622e-06	1	6.3245e-06	0.0011745	FALSE
BRUGEN29544	EHMT2	459.29/457.36/501.73	595.49/639.39/668.62	459.29	639.39	0.4764	902.56	1593.2	4.512	1	3.2108e-06	6.4215e-06	0.0011897	TRUE
BRUGEN71894	HES3	284.03/350.12/326.33	315.02/502.79/476.77	326.33	476.77	0.54557	1177.4	1114.3	4.5068	1	3.29e-06	6.58e-06	0.0012161	TRUE
BRUGEN45860	KLHL14	355.55/346.96/271.26	191.04/191.82/193.75	346.96	191.82	-0.85171	2902.2	1188.1	4.5011	3.3798e-06	1	6.7597e-06	0.0012464	FALSE
BRUGEN57176	LMTK3	392.81/307.01/299.82	451.19/452.42/506.21	307.01	452.42	0.55786	3707	1045.4	4.4973	1	3.4415e-06	6.8831e-06	0.0012661	TRUE
BRUGEN55224	KBTBD6	1587.4/1436.2/1275.7	1051.8/1442.5/1110.3	1436.2	1110.3	-0.37109	24299	5255.4	4.4964	3.4552e-06	1	6.9103e-06	0.0012681	FALSE
BRUGEN70577	SLC27A1	231.66/210.28/234.55	358.72/312.91/357.1	231.66	357.1	0.62216	232.7	778.67	4.4955	1	3.4707e-06	6.9415e-06	0.0012685	TRUE
BRUGEN76120	ZNF816-ZNF321P	652.68/679.21/677.14	457.29/379.76/625.88	677.14	457.29	-0.56532	301.29	2391.7	4.4954	3.4725e-06	1	6.945e-06	0.0012685	FALSE
BRUGEN16274	RPGR	399.86/435.28/445.64	609.72/523.14/629.68	435.28	609.72	0.48525	680.88	1506.2	4.4947	1	3.4842e-06	6.9683e-06	0.0012697	TRUE
BRUGEN45076	ATP13A1	140/201.87/139.71	239.82/236.38/189.95	140	236.38	0.75147	1913.8	459.92	4.494	1	3.4948e-06	6.9896e-06	0.0012706	TRUE
BRUGEN52436	SLC25A18	551.95/456.31/469.1	650.37/566.73/661.02	469.1	650.37	0.4705	3514.2	1628.9	4.4913	1	3.5392e-06	7.0784e-06	0.0012837	TRUE
BRUGEN42499	SIRPG	430.08/430.02/402.81	536.55/767.27/603.09	430.02	603.09	0.48699	370.2	1487.2	4.4877	1	3.5995e-06	7.199e-06	0.0013026	TRUE
BRUGEN34874	TSPAN17	221.59/239.72/218.23	420.71/343.91/276.38	221.59	343.91	0.63186	170.02	743.3	4.4868	1	3.6149e-06	7.2298e-06	0.0013029	TRUE
BRUGEN02070	FMNL1	115.83/116.71/125.43	154.46/213.13/204.2	116.71	204.2	0.80181	38.467	380.24	4.4867	1	3.6172e-06	7.2345e-06	0.0013029	TRUE
BRUGEN51279	C6orf25	336.41/239.72/302.88	294.7/158.88/137.71	302.88	158.88	-0.9265	2556.6	1030.6	4.4854	3.639e-06	1	7.2781e-06	0.0013077	FALSE
BRUGEN02505	CCNG1	416.99/487.85/480.32	663.58/644.23/717.06	480.32	663.58	0.46545	2033.7	1669.6	4.4849	1	3.6474e-06	7.2947e-06	0.0013077	TRUE
BRUGEN32339	KIAA1107	145.04/117.76/177.44	242.87/211.19/246.93	145.04	242.87	0.73976	897.13	477.23	4.4784	1	3.761e-06	7.5221e-06	0.0013453	TRUE
BRUGEN39175	LUC7L2	324.32/256.54/319.19	213.4/171.47/139.61	319.19	171.47	-0.89257	1975.6	1088.8	4.4768	3.7888e-06	1	7.5775e-06	0.0013521	FALSE
BRUGEN30664	ATXN2L	534.83/536.22/493.57	341.44/317.76/400.79	534.83	341.44	-0.64592	852.01	1868.4	4.474	3.839e-06	1	7.678e-06	0.0013639	FALSE
BRUGEN00648	ALDOC	946.78/912.62/784.21	846.49/656.83/594.54	912.62	656.83	-0.47388	8827.6	3268.8	4.4739	3.8396e-06	1	7.6791e-06	0.0013639	FALSE
BRUGEN51914	ADAMTS10	742.32/567.76/586.37	844.46/720.77/789.24	586.37	789.24	0.42801	12332	2057.3	4.4725	1	3.8648e-06	7.7295e-06	0.0013697	TRUE
BRUGEN14501	MED1	389.79/270.21/263.1	405.46/409.79/299.17	270.21	405.46	0.58371	7175.1	914.68	4.4721	1	3.8735e-06	7.7469e-06	0.0013697	TRUE
BRUGEN06084	FARSA	57.411/26.285/28.554	77.231/44.563/70.281	28.554	70.281	1.2702	418.95	87.383	4.4638	1	4.0301e-06	8.0602e-06	0.0014219	TRUE
BRUGEN66556	TAC4	74.534/90.421/73.424	176.82/143.38/126.32	74.534	143.38	0.93465	126.81	238	4.4625	1	4.0499e-06	8.0997e-06	0.0014256	TRUE
BRUGEN45194	CAMK1G	453.25/478.39/518.05	296.73/321.63/268.78	478.39	296.73	-0.6872	1102.5	1662.6	4.4551	4.1919e-06	1	8.3839e-06	0.0014722	FALSE
BRUGEN60947	SUN5	267.92/242.87/239.65	402.41/370.07/349.51	242.87	370.07	0.60556	318.83	818.13	4.4469	1	4.355e-06	8.71e-06	0.001526	TRUE
BRUGEN23912	KRT75	295.11/271.26/274.32	431.88/409.79/313.42	274.32	409.79	0.57728	220.85	929.24	4.444	1	4.4148e-06	8.8297e-06	0.0015435	TRUE
BRUGEN28848	CTCF	998.15/596.15/764.84	533.5/518.29/691.41	764.84	533.5	-0.51884	41446	2716.9	4.4381	4.5371e-06	1	9.0742e-06	0.0015827	FALSE
BRUGEN68739	HCAR2	614.4/703.39/582.3	789.58/834.11/820.58	614.4	820.58	0.41687	4474.8	2160.3	4.4359	1	4.584e-06	9.1681e-06	0.0015955	TRUE
BRUGEN61031	ISM1	920.59/983.06/938.2	1095.5/1195.5/1313.5	938.2	1195.5	0.34927	1161.3	3364.8	4.435	1	4.6032e-06	9.2064e-06	0.0015985	TRUE
BRUGEN49379	RIC3	444.18/425.82/476.24	548.75/618.08/673.37	444.18	618.08	0.47572	682.41	1538.4	4.4335	1	4.6364e-06	9.2728e-06	0.0016065	TRUE
BRUGEN42235	KLHL26	77.556/101.99/58.128	147.35/129.82/178.55	77.556	147.35	0.9172	487.15	248.09	4.4311	1	4.6881e-06	9.3762e-06	0.0016208	TRUE
BRUGEN03650	COL15A1	402.89/491.01/382.42	698.13/463.07/567.95	402.89	567.95	0.49435	4092	1389.1	4.4287	1	4.7404e-06	9.4807e-06	0.0016352	TRUE
BRUGEN47920	WDR13	847.07/588.79/613.91	932.87/819.58/694.26	613.91	819.58	0.41627	27497	2158.5	4.4269	1	4.7807e-06	9.5614e-06	0.0016454	TRUE
BRUGEN74898	TRIM49D2	493.54/357.48/384.46	540.62/545.42/553.7	384.46	545.42	0.50343	6312.9	1322.7	4.4257	1	4.8059e-06	9.6119e-06	0.0016505	TRUE
BRUGEN34049	ANAPC15	169.21/150.35/146.85	285.55/207.32/248.83	150.35	248.83	0.72307	184.01	495.51	4.4242	1	4.8407e-06	9.6814e-06	0.0016587	TRUE
BRUGEN19126	TGM2	598.29/456.31/577.2	739.79/803.11/775.94	577.2	775.94	0.42625	7529.3	2023.6	4.4181	1	4.9794e-06	9.9588e-06	0.0017025	TRUE
BRUGEN61229	ARHGAP42	222.59/158.76/209.06	341.44/211.19/325.76	209.06	325.76	0.63747	1356.4	699.4	4.413	0.99999	5.0973e-06	1.0195e-05	0.0017389	TRUE
BRUGEN18421	STK11	210.51/203.97/172.34	319.09/303.23/386.55	203.97	319.09	0.64303	521.56	681.63	4.4091	0.99999	5.1897e-06	1.0379e-05	0.0017666	TRUE
BRUGEN10522	LBR	224.61/237.62/194.78	96.539/103.66/165.26	224.61	103.66	-1.1081	529.54	753.9	4.405	5.2881e-06	0.99999	1.0576e-05	0.0017961	FALSE
BRUGEN50946	ACSF2	888.36/896.85/787.27	651.38/597.73/640.13	888.36	640.13	-0.47216	5145.8	3177.9	4.4034	5.3276e-06	0.99999	1.0655e-05	0.0017987	FALSE
BRUGEN46102	MYH7B	171.23/147.2/127.47	255.07/244.13/211.79	147.2	244.13	0.72604	483.23	484.65	4.4031	0.99999	5.3352e-06	1.067e-05	0.0017987	TRUE
BRUGEN26816	MAMLD1	366.63/318.58/327.35	474.56/431.1/487.22	327.35	474.56	0.5344	809.81	1117.9	4.4029	0.99999	5.3396e-06	1.0679e-05	0.0017987	TRUE
BRUGEN12814	NPTX2	400.87/420.56/524.17	588.38/503.76/623.98	420.56	588.38	0.48345	5561	1452.9	4.4026	0.99999	5.3483e-06	1.0697e-05	0.0017987	TRUE
BRUGEN68516	RFESD	577.13/509.93/549.66	628.01/750.8/742.7	549.66	742.7	0.43355	1166.7	1922.7	4.4024	0.99999	5.3537e-06	1.0707e-05	0.0017987	TRUE
BRUGEN42000	NAT10	94.678/66.238/54.048	130.07/71.689/143.41	66.238	130.07	0.96301	478.71	210.4	4.4009	0.99999	5.3911e-06	1.0782e-05	0.0018073	TRUE
BRUGEN43847	SMG9	134.97/138.79/147.87	232.71/199.57/243.13	138.79	232.71	0.7415	48.542	455.74	4.3996	0.99999	5.4216e-06	1.0843e-05	0.0018136	TRUE
BRUGEN19523	TPR	169.21/167.17/170.3	273.36/262.54/280.17	169.21	273.36	0.68872	2.6743	560.67	4.3983	0.99999	5.456e-06	1.0912e-05	0.0018212	TRUE
BRUGEN12398	NDUFV3	613.39/536.22/520.09	646.3/1119.9/726.55	536.22	726.55	0.43755	3108.3	1873.5	4.3974	0.99999	5.4767e-06	1.0953e-05	0.001824	TRUE
BRUGEN50869	TTI2	34.245/32.594/68.325	107.72/79.439/73.13	34.245	79.439	1.1905	582.09	105.64	4.3971	0.99999	5.4881e-06	1.0976e-05	0.001824	TRUE
BRUGEN30048	HSF2BP	132.95/103.04/100.96	192.06/114.31/183.3	103.04	183.3	0.82496	449.61	333.83	4.3929	0.99999	5.5919e-06	1.1184e-05	0.0018546	TRUE
BRUGEN16921	SCNN1A	327.34/397.43/356.92	468.47/510.54/546.1	356.92	510.54	0.5152	1257.9	1223.8	4.3913	0.99999	5.6342e-06	1.1268e-05	0.0018646	TRUE
BRUGEN05758	ERCC3	29.209/62.033/24.475	73.166/70.72/58.884	29.209	70.72	1.2474	549.9	89.477	4.3884	0.99999	5.7149e-06	1.143e-05	0.0018873	TRUE
BRUGEN09920	JUND	735.27/616.12/588.41	820.07/804.08/1056.1	616.12	820.07	0.41195	7481.6	2166.7	4.3815	0.99999	5.8931e-06	1.1786e-05	0.0019384	TRUE
BRUGEN70914	TOMM20L	319.29/334.35/362.02	503.02/434.01/482.47	334.35	482.47	0.52777	496.38	1142.9	4.3814	0.99999	5.8948e-06	1.179e-05	0.0019384	TRUE
BRUGEN38794	LCMT1	84.606/96.729/92.8	191.04/168.57/151.01	92.8	168.57	0.85418	41.29	299.25	4.3798	0.99999	5.9388e-06	1.1878e-05	0.0019487	TRUE
BRUGEN53493	ZBED3	728.22/894.74/769.94	998.92/926.14/1018.1	769.94	998.92	0.3752	8658.9	2735.9	4.3778	0.99999	5.9936e-06	1.1987e-05	0.0019626	TRUE
BRUGEN17101	SEC13	140/126.17/88.721	224.58/215.07/169.05	126.17	215.07	0.76474	796.85	412.52	4.3769	0.99999	6.0179e-06	1.2036e-05	0.0019664	TRUE
BRUGEN73215	BECN2	252.81/170.33/183.56	300.79/291.6/291.57	183.56	291.6	0.66483	2485.4	610.47	4.3727	0.99999	6.1367e-06	1.2273e-05	0.002001	TRUE
BRUGEN21983	CUL2	74.534/56.776/28.554	152.43/115.28/80.728	56.776	115.28	1.0091	555.91	179.1	4.3718	0.99999	6.1613e-06	1.2323e-05	0.0020048	TRUE
BRUGEN18486	SUOX	395.84/332.24/418.11	328.23/234.44/208.94	395.84	234.44	-0.75317	2270.1	1363.7	4.3704	6.1996e-06	0.99999	1.2399e-05	0.002013	FALSE
BRUGEN76386	LOC101929372	134.97/110.4/86.681	193.08/198.6/110.17	110.4	193.08	0.80092	583.05	358.79	4.365	0.99999	6.3573e-06	1.2715e-05	0.0020599	TRUE
BRUGEN50548	ELOVL7	246.77/173.48/382.42	120.93/112.38/209.89	246.77	120.93	-1.023	11886	831.85	4.3631	6.4111e-06	0.99999	1.2822e-05	0.0020704	FALSE
BRUGEN66041	PXT1	397.85/426.87/460.94	594.47/601.61/443.53	426.87	594.47	0.47687	1001.5	1475.8	4.3629	0.99999	6.4165e-06	1.2833e-05	0.0020704	TRUE
BRUGEN09076	IAPP	145.04/158.76/140.73	240.84/180.19/240.29	145.04	240.29	0.72439	103.44	477.23	4.36	0.99999	6.5031e-06	1.3006e-05	0.0020901	TRUE
BRUGEN42093	TYW1	658.72/709.7/752.6	572.12/491.17/484.37	709.7	491.17	-0.53009	2219.7	2512.2	4.36	6.5045e-06	0.99999	1.3009e-05	0.0020901	FALSE
BRUGEN00620	ALDH3B1	309.22/244.98/283.5	418.67/434.98/390.35	283.5	418.67	0.56084	1072.6	961.78	4.3587	0.99999	6.543e-06	1.3086e-05	0.0020981	TRUE
BRUGEN72584	IFITM10	430.08/518.34/482.36	618.86/660.7/662.92	482.36	660.7	0.45309	2013.9	1677.1	4.355	0.99999	6.6541e-06	1.3308e-05	0.0021293	TRUE
BRUGEN05208	E2F3	26.188/9.4626/14.277	46.745/42.626/30.392	14.277	42.626	1.5138	82.521	42.393	4.354	0.99999	6.7791e-06	1.3558e-05	0.0021598	TRUE
BRUGEN20909	MAP3K12	1.0072/9.4626/0	8.1296/8.7189/1.8995	1.0072	8.1296	2.1854	36.254	2.6761	4.3538	0.99999	9.1519e-06	1.8304e-05	0.0027524	TRUE
BRUGEN55489	GADD45GIP1	170.22/108.29/103	142.27/189.88/215.59	108.29	189.88	0.80444	1931.4	351.65	4.3506	0.99999	6.7873e-06	1.3575e-05	0.0021598	TRUE
BRUGEN30249	PKIG	629.51/547.78/510.91	624.96/738.2/756	547.78	738.2	0.42974	4019.5	1915.8	4.3505	0.99999	6.7911e-06	1.3582e-05	0.0021598	TRUE
BRUGEN46864	TGIF2	497.56/551.99/568.02	719.47/743.05/753.15	551.99	743.05	0.42815	1609.4	1931.2	4.3477	0.99999	6.88e-06	1.376e-05	0.0021836	TRUE
BRUGEN57767	TOP1MT	144.03/88.318/74.444	161.58/172.44/94.025	88.318	161.58	0.86409	1648.3	284.16	4.3458	0.99999	6.9395e-06	1.3879e-05	0.002198	TRUE
BRUGEN58892	WDR81	523.75/473.13/509.89	319.09/438.85/326.71	509.89	326.71	-0.64059	771.69	1777.4	4.345	6.9644e-06	0.99999	1.3929e-05	0.0022014	FALSE
BRUGEN75656	NBPF20	496.56/568.81/495.61	603.62/683.95/677.17	496.56	677.17	0.44678	2610.7	1728.8	4.3439	0.99999	6.9996e-06	1.3999e-05	0.002208	TRUE
BRUGEN49964	ALG9	932.68/979.91/919.84	1071.1/1183.8/1248.9	932.68	1183.8	0.34369	1197.6	3344.1	4.3431	0.99999	7.0232e-06	1.4046e-05	0.0022109	TRUE
BRUGEN21389	MKKS	499.58/389.02/362.02	547.73/512.48/607.84	389.02	547.73	0.49255	6476.1	1339.1	4.337	0.99999	7.2212e-06	1.4442e-05	0.0022686	TRUE
BRUGEN21441	AKAP17A	663.75/492.06/512.95	851.57/667.48/696.16	512.95	696.16	0.43987	11589	1788.5	4.3322	0.99999	7.3817e-06	1.4763e-05	0.0023144	TRUE
BRUGEN64843	ZNF385C	420.01/412.15/326.33	306.89/238.32/248.83	412.15	248.83	-0.7257	3713.4	1422.6	4.3301	7.4524e-06	0.99999	1.4905e-05	0.0023318	FALSE
BRUGEN07373	GNG10	428.07/381.66/372.22	552.81/479.54/538.51	381.66	538.51	0.49558	1121.3	1312.6	4.3291	0.99999	7.4856e-06	1.4971e-05	0.0023375	TRUE
BRUGEN05035	DRD2	945.77/839.02/879.05	1132/1007.5/1121.6	879.05	1121.6	0.35124	3027.2	3143.1	4.3272	0.99999	7.5512e-06	1.5102e-05	0.0023532	TRUE
BRUGEN05550	EMP1	1618.6/1167.1/1277.8	1166.6/865.11/982.99	1277.8	982.99	-0.37807	64205	4649.9	4.3232	7.6888e-06	0.99999	1.5378e-05	0.0023913	FALSE
BRUGEN18125	SPRR2G	1172.4/1453/809.71	1852.5/1322.4/1454.1	1172.4	1454.1	0.31038	105150	4249.1	4.3209	0.99999	7.7689e-06	1.5538e-05	0.0024113	TRUE
BRUGEN11984	MYBPC3	604.33/577.22/588.41	825.15/784.7/641.08	588.41	784.7	0.4147	189.29	2064.8	4.3198	0.99999	7.8098e-06	1.562e-05	0.002418	TRUE
BRUGEN62430	KANSL1L	555.98/553.04/547.62	774.34/743.05/701.86	553.04	743.05	0.42541	18.997	1935.1	4.3194	0.99999	7.8217e-06	1.5643e-05	0.002418	TRUE
BRUGEN49347	SAP130	227.63/225/208.04	343.47/328.41/363.75	225	343.47	0.60807	147.36	755.28	4.3109	0.99999	8.129e-06	1.6258e-05	0.0025081	TRUE
BRUGEN74842	SPACA5B	239.72/301.75/281.46	288.6/414.63/472.97	281.46	414.63	0.55727	1077.1	954.54	4.3104	0.99999	8.1466e-06	1.6293e-05	0.0025085	TRUE
BRUGEN35992	MOCS3	445.19/427.92/409.95	669.67/423.35/593.59	427.92	593.59	0.47118	310.53	1479.6	4.307	0.99999	8.2742e-06	1.6548e-05	0.0025427	TRUE
BRUGEN23172	HCAR3	568.07/579.32/591.47	773.33/570.61/801.58	579.32	773.33	0.41608	137.14	2031.4	4.3043	0.99999	8.3743e-06	1.6749e-05	0.0025684	TRUE
BRUGEN70009	FOXD4L4	498.57/508.88/521.11	690/658.76/702.81	508.88	690	0.43852	127.9	1773.7	4.3005	0.99999	8.5187e-06	1.7037e-05	0.0026061	TRUE
BRUGEN41054	ADPRHL2	374.68/443.69/482.36	478.63/612.26/619.23	443.69	612.26	0.4637	3128.6	1536.7	4.3002	0.99999	8.5308e-06	1.7062e-05	0.0026061	TRUE
BRUGEN44262	EIF4ENIF1	157.13/131.43/133.59	223.56/174.38/277.33	133.59	223.56	0.73853	279.27	437.93	4.2994	0.99999	8.564e-06	1.7128e-05	0.002611	TRUE
BRUGEN75775	MTRNR2L1	362.6/403.74/355.9	514.2/389.45/547.05	362.6	514.2	0.50278	868.72	1244.1	4.2979	0.99999	8.6204e-06	1.7241e-05	0.0026231	TRUE
BRUGEN59651	C22orf39	482.46/452.1/407.91	558.91/629.7/622.08	452.1	622.08	0.45958	1437	1567.2	4.2938	0.99999	8.7831e-06	1.7566e-05	0.0026673	TRUE
BRUGEN15934	RBP1	97.7/133.53/100.96	182.92/153.07/178.55	100.96	178.55	0.81642	535.71	326.79	4.2923	0.99999	8.8421e-06	1.7684e-05	0.00268	TRUE
BRUGEN13890	PI3	639.58/553.04/494.59	741.82/780.83/632.53	553.04	741.82	0.42303	5452.7	1935.1	4.2916	0.99999	8.8693e-06	1.7739e-05	0.002683	TRUE
BRUGEN32046	PSME4	537.85/595.09/548.64	360.75/292.57/401.74	548.64	360.75	-0.6035	1137.1	1919	4.2892	8.9653e-06	0.99999	1.7931e-05	0.0027067	FALSE
BRUGEN03623	COL9A2	495.55/413.2/404.85	575.17/606.45/425.49	413.2	575.17	0.47615	3425.5	1426.4	4.2885	0.99999	8.9932e-06	1.7986e-05	0.0027099	TRUE
BRUGEN61008	C20orf62	188.35/168.22/166.22	269.29/233.47/285.87	168.22	269.29	0.67558	204.5	557.25	4.2814	0.99999	9.2867e-06	1.8573e-05	0.0027875	TRUE
BRUGEN50285	GGNBP2	141.01/172.43/174.38	70.118/95.908/56.985	172.43	70.118	-1.2861	495.52	571.83	4.2786	9.4055e-06	0.99999	1.8811e-05	0.0028177	FALSE
BRUGEN57156	CARD16	111.8/97.781/72.405	188/168.57/173.8	97.781	173.8	0.82343	420.26	316.05	4.2763	0.99999	9.503e-06	1.9006e-05	0.0028414	TRUE
BRUGEN19453	TP53	342.45/320.68/421.17	488.79/464.04/543.25	342.45	488.79	0.51205	3335.3	1171.9	4.2747	0.99999	9.5702e-06	1.914e-05	0.002856	TRUE
BRUGEN65305	SMTNL1	145.04/116.71/118.29	202.22/178.25/203.25	118.29	202.22	0.76853	358.89	385.66	4.2737	0.99999	9.6109e-06	1.9222e-05	0.0028626	TRUE
BRUGEN48858	TMEM109	185.33/131.43/135.63	248.97/225.72/188.05	135.63	225.72	0.73065	1243.7	444.92	4.2712	0.99999	9.7215e-06	1.9443e-05	0.00289	TRUE
BRUGEN17061	SDC1	713.11/735.98/720.99	905.43/936.8/1064.7	720.99	936.8	0.37731	143.48	2554.1	4.2704	0.99999	9.7583e-06	1.9517e-05	0.0028954	TRUE
BRUGEN58823	LSM12	322.31/357.48/330.41	186.98/233.47/123.47	330.41	186.98	-0.81804	399.14	1128.8	4.2689	9.8198e-06	0.99999	1.964e-05	0.0029081	FALSE
BRUGEN76663	NonTargetingControl	770.52/661.33/694.47	798.73/905.8/1228	694.47	905.8	0.38279	3440.7	2455.9	4.2644	0.99999	1.0023e-05	2.0045e-05	0.0029624	TRUE
BRUGEN12943	NUP98	75.541/29.439/31.613	90.441/73.627/52.236	31.613	73.627	1.1942	967.19	97.178	4.2619	0.99999	1.0142e-05	2.0284e-05	0.0029897	TRUE
BRUGEN29865	TMED1	719.15/628.74/619.01	829.22/741.11/834.83	628.74	829.22	0.39873	4134.5	2213.1	4.2615	0.99999	1.0154e-05	2.0307e-05	0.0029897	TRUE
BRUGEN33401	EDC4	499.58/434.23/511.93	668.66/677.17/870.92	499.58	677.17	0.43805	2211.5	1739.8	4.2577	0.99999	1.0326e-05	2.0651e-05	0.003034	TRUE
BRUGEN05203	E2F1	670.81/681.31/699.57	890.19/822.49/898.46	681.31	890.19	0.3853	221.9	2407.2	4.2574	0.99999	1.0343e-05	2.0686e-05	0.003034	TRUE
BRUGEN67818	OR2Z1	576.13/459.46/462.98	574.15/633.58/765.49	462.98	633.58	0.45173	6407.2	1606.6	4.2561	0.99999	1.0403e-05	2.0806e-05	0.0030365	TRUE
BRUGEN31896	CLCC1	151.08/123.01/112.18	208.32/188.91/231.74	123.01	208.32	0.75521	452.64	401.75	4.256	0.99999	1.0406e-05	2.0812e-05	0.0030365	TRUE
BRUGEN19615	TRPC6	379.72/362.73/407.91	533.5/415.6/599.29	379.72	533.5	0.48947	541.68	1305.7	4.2559	0.99999	1.041e-05	2.0821e-05	0.0030365	TRUE
BRUGEN30042	TPPP	198.42/203.97/232.51	315.02/365.23/304.87	203.97	315.02	0.62459	422.62	681.63	4.2534	0.99999	1.0526e-05	2.1053e-05	0.0030645	TRUE
BRUGEN19189	TIAL1	794.69/839.02/772.99	546.71/568.67/585.99	794.69	568.67	-0.48209	1217.9	2828	4.2502	1.0678e-05	0.99999	2.1355e-05	0.0031016	FALSE
BRUGEN04984	DPH1	202.45/173.48/195.8	147.35/87.189/65.532	195.8	87.189	-1.158	271.14	653.09	4.2499	1.0694e-05	0.99999	2.1387e-05	0.0031016	FALSE
BRUGEN17108	SECTM1	325.33/351.17/310.01	437.98/466.95/497.67	325.33	466.95	0.52001	451.11	1110.7	4.2493	0.99999	1.0722e-05	2.1445e-05	0.0031041	TRUE
BRUGEN26333	TELO2	247.77/223.95/175.4	340.43/372.98/273.53	223.95	340.43	0.60197	1462.2	751.59	4.2486	0.99999	1.0754e-05	2.1508e-05	0.0031074	TRUE
BRUGEN60566	C9orf57	80.577/73.598/77.503	86.377/144.35/154.81	77.503	144.35	0.88867	12.349	247.91	4.2453	0.99999	1.0915e-05	2.1829e-05	0.003148	TRUE
BRUGEN60936	RIMS4	583.18/553.04/590.45	577.2/940.68/774.99	583.18	774.99	0.40963	480.66	2045.6	4.2411	0.99999	1.1123e-05	2.2247e-05	0.0032022	TRUE
BRUGEN08755	HOXD3	990.09/1112.4/950.44	1214.4/1242.9/1443.6	990.09	1242.9	0.32782	8264	3559.9	4.2376	0.99999	1.1294e-05	2.2588e-05	0.0032453	TRUE
BRUGEN28616	AHSA1	960.88/1151.3/1171.7	841.41/877.71/990.58	1151.3	877.71	-0.39105	18336	4169	4.2371	1.1321e-05	0.99999	2.2643e-05	0.0032472	FALSE
BRUGEN48675	C19orf43	749.37/660.28/701.61	944.05/912.58/867.12	701.61	912.58	0.37881	1994.4	2482.3	4.2345	0.99999	1.1455e-05	2.291e-05	0.0032795	TRUE
BRUGEN73271	FAM47C	271.95/285.98/289.62	378.02/418.51/417.89	285.98	417.89	0.5456	105.08	970.59	4.234	0.99999	1.1481e-05	2.2962e-05	0.0032808	TRUE
BRUGEN10282	KPNA4	312.24/259.7/289.62	514.2/422.38/349.51	289.62	422.38	0.54284	703.44	983.5	4.2335	0.99999	1.1504e-05	2.3009e-05	0.0032815	TRUE
BRUGEN04460	CYP51A1	801.74/731.78/680.19	516.23/541.54/503.36	731.78	516.23	-0.50258	3778	2594.1	4.2321	1.1578e-05	0.99999	2.3156e-05	0.0032963	FALSE
BRUGEN36308	NOB1	136.98/94.626/86.681	263.19/168.57/118.72	94.626	168.57	0.82637	928.53	305.41	4.231	0.99999	1.1635e-05	2.327e-05	0.0033065	TRUE
BRUGEN10292	IPO5	216.55/161.92/169.28	69.101/77.502/50.336	169.28	69.101	-1.2804	1144.2	560.92	4.23	1.1684e-05	0.99999	2.3369e-05	0.0033145	FALSE
BRUGEN10590	LGALS1	326.34/263.9/258	390.22/377.82/397.94	263.9	390.22	0.56252	1966.5	892.36	4.2286	0.99999	1.176e-05	2.3519e-05	0.0033297	TRUE
BRUGEN59700	LYG1	687.93/769.63/691.41	843.44/925.18/900.36	691.41	900.36	0.38047	3064.9	2444.5	4.2261	0.99999	1.1891e-05	2.3783e-05	0.0033609	TRUE
BRUGEN41257	GID8	126.91/117.76/75.464	211.37/200.54/170.95	117.76	200.54	0.76302	936.24	383.82	4.2252	0.99999	1.1935e-05	2.387e-05	0.003367	TRUE
BRUGEN76841	NonTargetingControl	743.32/668.69/599.63	873.93/738.2/912.7	668.69	873.93	0.38567	5169.7	2360.5	4.2242	0.99999	1.1987e-05	2.3975e-05	0.0033757	TRUE
BRUGEN24978	CHST10	177.27/170.33/119.31	283.52/244.13/270.68	170.33	270.68	0.66514	1325.3	564.54	4.2235	0.99999	1.2028e-05	2.4057e-05	0.0033811	TRUE
BRUGEN42739	ZCCHC8	370.66/356.43/467.06	521.31/475.67/615.43	370.66	521.31	0.49094	4748.2	1273.1	4.2223	0.99999	1.209e-05	2.4179e-05	0.0033922	TRUE
BRUGEN00882	APBA1	461.3/336.45/299.82	453.22/506.67/479.62	336.45	479.62	0.51023	8465.4	1150.4	4.2211	0.99999	1.2156e-05	2.4311e-05	0.0034045	TRUE
BRUGEN50328	MORN1	289.07/287.03/232.51	418.67/345.85/515.71	287.03	418.67	0.54303	1488.4	974.32	4.2173	0.99999	1.2362e-05	2.4724e-05	0.003456	TRUE
BRUGEN05965	F8	357.56/350.12/324.29	362.78/496.01/524.26	350.12	496.01	0.50132	361.22	1199.4	4.2127	0.99999	1.2619e-05	2.5238e-05	0.0035215	TRUE
BRUGEN40140	CCDC93	571.09/556.19/581.28	775.36/759.52/602.14	571.09	759.52	0.41073	162.85	2001.2	4.212	0.99999	1.2654e-05	2.5308e-05	0.0035241	TRUE
BRUGEN60998	NEURL2	188.35/182.94/174.38	320.1/253.82/286.82	182.94	286.82	0.64591	51.256	608.33	4.2117	0.99999	1.2674e-05	2.5347e-05	0.0035241	TRUE
BRUGEN61396	SERPINA12	772.53/743.34/593.51	427.82/759.52/527.11	743.34	527.11	-0.49513	11650	2637	4.2108	1.2723e-05	0.99999	2.5446e-05	0.0035315	FALSE
BRUGEN08576	HNRNPA2B1	202.45/257.59/189.68	242.87/311.94/317.21	202.45	311.94	0.62123	1602	676.31	4.2103	0.99999	1.2749e-05	2.5499e-05	0.0035325	TRUE
BRUGEN26134	LCMT2	466.34/439.49/440.55	242.87/338.1/276.38	440.55	276.38	-0.67072	333.24	1525.3	4.2036	1.3135e-05	0.99999	2.627e-05	0.0036256	FALSE
BRUGEN71563	OR51M1	364.61/383.76/367.12	466.43/516.35/546.1	367.12	516.35	0.49097	141.61	1260.4	4.2035	0.99999	1.3139e-05	2.6279e-05	0.0036256	TRUE
BRUGEN75453	DPH3P1	356.55/335.4/276.36	485.74/465.01/477.72	335.4	477.72	0.50902	1966.5	1146.7	4.203	0.99999	1.3172e-05	2.6344e-05	0.0036256	TRUE
BRUGEN00627	ALDH3B2	598.29/485.75/406.89	658.49/594.83/674.32	485.75	658.49	0.43818	9441.4	1689.4	4.2028	0.99999	1.3179e-05	2.6358e-05	0.0036256	TRUE
BRUGEN24420	SRSF11	506.63/556.19/475.22	687.96/682.98/676.22	506.63	682.98	0.43019	1721.6	1765.5	4.1972	0.99999	1.3514e-05	2.7028e-05	0.0037111	TRUE
BRUGEN55160	FCHSD1	63.455/78.855/54.048	122.96/133.69/92.125	63.455	122.96	0.94352	162.83	201.17	4.1954	0.99999	1.3618e-05	2.7237e-05	0.0037332	TRUE
BRUGEN34846	OPTC	180.29/220.79/214.15	338.39/326.48/214.64	214.15	326.48	0.60602	595.39	717.25	4.194	0.99999	1.3704e-05	2.7408e-05	0.00375	TRUE
BRUGEN72727	FNDC9	74.534/51.519/97.899	139.22/94.94/153.86	74.534	139.22	0.89248	537.81	238	4.1929	0.99999	1.3769e-05	2.7538e-05	0.0037592	TRUE
BRUGEN01858	BPI	102.74/115.65/101.98	134.14/179.22/189.95	102.74	179.22	0.79686	83.731	332.81	4.1926	0.99999	1.3786e-05	2.7572e-05	0.0037592	TRUE
BRUGEN30692	SCN11A	506.63/487.85/462.98	660.53/483.42/743.65	487.85	660.53	0.4364	485.57	1697.1	4.1916	0.99999	1.3847e-05	2.7694e-05	0.0037692	TRUE
BRUGEN13973	PIK3CB	438.14/468.93/457.88	658.49/624.86/523.31	457.88	624.86	0.44771	255.89	1588.1	4.1899	0.99999	1.3951e-05	2.7902e-05	0.0037841	TRUE
BRUGEN26647	RCE1	1338.6/1264.8/1231.9	1545.6/1556.8/1549	1264.8	1549	0.29221	3262.1	4600.6	4.1899	0.99999	1.3951e-05	2.7902e-05	0.0037841	TRUE
BRUGEN22784	CTSF	657.71/630.84/568.02	828.2/664.58/852.87	630.84	828.2	0.39216	2334.4	2220.9	4.1879	0.99999	1.408e-05	2.8159e-05	0.0038124	TRUE
BRUGEN72646	ZBTB34	421.02/381.66/394.66	553.83/464.04/548.95	394.66	548.95	0.47506	431.88	1359.4	4.1848	0.99999	1.427e-05	2.854e-05	0.0038572	TRUE
BRUGEN24392	GPR37L1	170.22/124.07/120.33	314/208.29/157.66	124.07	208.29	0.74279	1072	405.34	4.1832	0.99999	1.4374e-05	2.8747e-05	0.0038785	TRUE
BRUGEN75939	LRCOL1	136.98/128.27/168.26	225.6/219.91/248.83	136.98	225.6	0.71565	527.24	449.55	4.1794	0.99999	1.4613e-05	2.9226e-05	0.0039361	TRUE
BRUGEN48316	MRPL40	675.84/578.27/506.83	769.26/713.98/766.44	578.27	766.44	0.40582	7311.7	2027.6	4.179	0.99999	1.4642e-05	2.9284e-05	0.0039363	TRUE
BRUGEN54711	PHYKPL	164.18/161.92/204.98	201.21/261.57/302.02	164.18	261.57	0.66869	834.88	543.24	4.1786	0.99999	1.4668e-05	2.9336e-05	0.0039363	TRUE
BRUGEN19255	TLE4	553.97/469.98/504.79	554.84/726.58/680.02	504.79	680.02	0.42915	1815.2	1758.8	4.1782	0.99999	1.469e-05	2.9379e-05	0.0039363	TRUE
BRUGEN51778	FAM83D	682.89/748.6/783.19	900.35/963.93/1077	748.6	963.93	0.3643	2757.1	2656.6	4.1777	0.99999	1.4723e-05	2.9447e-05	0.0039385	TRUE
BRUGEN16185	RNASE4	592.24/570.91/530.29	384.12/467.92/336.21	570.91	384.12	-0.57048	1052.7	2000.6	4.1762	1.4822e-05	0.99999	2.9645e-05	0.0039582	FALSE
BRUGEN24496	GTF3C5	582.17/465.77/417.09	629.03/633.58/712.31	465.77	633.58	0.44308	7959.2	1616.8	4.1733	0.99998	1.5012e-05	3.0023e-05	0.0039893	TRUE
BRUGEN42232	FBXW7	425.04/430.02/451.76	571.1/590.95/632.53	430.02	590.95	0.45771	248.7	1487.2	4.173	0.99998	1.5033e-05	3.0065e-05	0.0039893	TRUE
BRUGEN37336	IRX4	521.74/554.09/527.23	706.26/604.51/745.55	527.23	706.26	0.42107	375.86	1840.6	4.1729	0.99998	1.5038e-05	3.0076e-05	0.0039893	TRUE
BRUGEN70614	CATSPER4	432.1/432.13/503.77	593.46/386.54/597.39	432.13	593.46	0.45679	2566.5	1494.8	4.1728	0.99998	1.5042e-05	3.0084e-05	0.0039893	TRUE
BRUGEN30348	PSIP1	555.98/574.07/480.32	440.01/372.01/333.36	555.98	372.01	-0.57843	3026.1	1945.8	4.1707	1.5186e-05	0.99998	3.0372e-05	0.0040143	FALSE
BRUGEN19518	TPP2	98.707/115.65/136.65	156.49/220.88/196.6	115.65	196.6	0.76032	364.03	376.66	4.1706	0.99998	1.5188e-05	3.0377e-05	0.0040143	TRUE
BRUGEN16565	RPS15	46.332/21.028/17.336	69.101/54.251/23.744	21.028	54.251	1.3267	326.96	63.497	4.1693	0.99998	1.534e-05	3.0681e-05	0.0040476	TRUE
BRUGEN54116	PRRC2B	733.25/662.38/606.77	863.77/824.42/927.9	662.38	863.77	0.38247	4057.6	2337.2	4.1655	0.99998	1.5531e-05	3.1062e-05	0.0040909	TRUE
BRUGEN48213	RFX7	613.39/709.7/764.84	902.38/918.39/1141.6	709.7	918.39	0.37145	6157.4	2512.2	4.1638	0.99998	1.5653e-05	3.1306e-05	0.0041161	TRUE
BRUGEN32085	MLC1	70.505/77.804/120.33	154.46/124.97/143.41	77.804	143.41	0.87385	931.05	248.92	4.1584	0.99998	1.6023e-05	3.2047e-05	0.0042064	TRUE
BRUGEN12956	OAS1	35.253/35.748/40.791	86.377/79.439/77.879	35.748	79.439	1.1302	12.841	110.48	4.1567	0.99998	1.615e-05	3.23e-05	0.0042324	TRUE
BRUGEN67392	CHAMP1	668.79/658.18/651.64	854.62/858.33/905.11	658.18	858.33	0.38254	77.68	2321.7	4.1539	0.99998	1.6342e-05	3.2684e-05	0.0042754	TRUE
BRUGEN51325	NDFIP1	487.49/495.21/410.97	658.49/536.7/695.21	487.49	658.49	0.43303	2957.4	1695.7	4.1526	0.99998	1.6434e-05	3.2868e-05	0.0042922	TRUE
BRUGEN32069	ARL6IP1	130.94/110.4/87.701	189.01/147.25/207.99	110.4	189.01	0.77038	468.51	358.79	4.1504	0.99998	1.6597e-05	3.3194e-05	0.0043276	TRUE
BRUGEN17170	SFPQ	8.0577/17.874/5.0989	28.453/28.094/17.095	8.0577	28.094	1.6835	52.556	23.346	4.1469	0.99998	1.7696e-05	3.5391e-05	0.0045301	TRUE
BRUGEN42231	FBXW7	244.75/233.41/195.8	333.31/349.73/349.51	233.41	349.51	0.58039	771.7	784.83	4.144	0.99998	1.7062e-05	3.4124e-05	0.0044413	TRUE
BRUGEN31334	TPX2	143.02/106.19/103	184.95/183.1/170.95	106.19	183.1	0.78028	683.43	344.52	4.1434	0.99998	1.7112e-05	3.4223e-05	0.0044468	TRUE
BRUGEN61892	IGFL2	554.98/402.69/359.98	503.02/557.04/748.4	402.69	557.04	0.46714	12508	1388.4	4.1425	0.99998	1.7176e-05	3.4352e-05	0.0044529	TRUE
BRUGEN45377	ZNF304	90.649/91.472/113.2	162.59/95.908/165.26	91.472	162.59	0.82301	236.3	294.78	4.1423	0.99998	1.7193e-05	3.4385e-05	0.0044529	TRUE
BRUGEN04991	DPH2	394.83/339.6/334.49	287.58/170.5/198.5	339.6	198.5	-0.77173	1538	1161.7	4.14	1.7368e-05	0.99998	3.4736e-05	0.004485	FALSE
BRUGEN44534	THAP10	55.397/35.748/22.435	79.263/62.97/105.42	35.748	79.263	1.1271	281.66	110.48	4.14	0.99998	1.7374e-05	3.4749e-05	0.004485	TRUE
BRUGEN00744	AMPD3	369.65/382.71/470.12	551.79/505.7/532.81	382.71	532.81	0.4763	3905.5	1316.4	4.1369	0.99998	1.7605e-05	3.5211e-05	0.0045301	TRUE
BRUGEN09502	IL12RB1	386.77/453.16/293.7	572.12/537.67/523.31	386.77	537.67	0.47419	6534.8	1331	4.136	0.99998	1.7667e-05	3.5335e-05	0.0045301	TRUE
BRUGEN75740	TMED7-TICAM2	479.43/390.07/371.2	541.63/560.92/386.55	390.07	541.63	0.47255	4171	1342.9	4.1358	0.99998	1.7683e-05	3.5367e-05	0.0045301	TRUE
BRUGEN63315	LDHAL6A	202.45/192.41/279.42	293.68/310.01/336.21	202.45	310.01	0.61227	3012.6	676.31	4.1358	0.99998	1.7683e-05	3.5367e-05	0.0045301	TRUE
BRUGEN14636	PPP2R4	339.43/351.17/349.79	547.73/420.45/492.92	349.79	492.92	0.49368	54.558	1198.2	4.135	0.99998	1.7748e-05	3.5496e-05	0.0045361	TRUE
BRUGEN32828	SLC35A3	112.81/91.472/86.681	194.09/95.908/162.41	91.472	162.41	0.82137	239.09	294.78	4.1315	0.99998	1.8019e-05	3.6038e-05	0.0045977	TRUE
BRUGEN11726	MPV17	153.1/129.32/181.52	245.92/196.66/283.97	153.1	245.92	0.6802	686.58	504.98	4.1307	0.99998	1.8086e-05	3.6173e-05	0.0046073	TRUE
BRUGEN46689	LY6G6D	124.89/218.69/118.29	208.32/218.94/184.25	124.89	208.32	0.73349	4420.7	408.17	4.1293	0.99998	1.8193e-05	3.6386e-05	0.0046268	TRUE
BRUGEN32027	GANAB	333.39/285.98/275.34	414.61/415.6/343.81	285.98	414.61	0.53426	1180.3	970.59	4.1287	0.99998	1.8242e-05	3.6485e-05	0.0046279	TRUE
BRUGEN00174	ACRV1	209.5/313.32/261.06	425.79/258.66/383.7	261.06	383.7	0.5538	2694.6	882.32	4.1285	0.99998	1.8257e-05	3.6514e-05	0.0046279	TRUE
BRUGEN42574	BATF3	78.563/59.93/70.365	132.11/69.751/143.41	70.365	132.11	0.89928	88.046	224.11	4.1242	0.99998	1.8599e-05	3.7199e-05	0.0047071	TRUE
BRUGEN20475	CNBP	492.53/426.87/469.1	578.22/635.51/873.77	469.1	635.51	0.43722	1166.1	1628.9	4.1233	0.99998	1.8672e-05	3.7345e-05	0.0047109	TRUE
BRUGEN57633	DNTTIP1	552.96/563.55/521.11	667.64/734.33/750.3	552.96	734.33	0.4086	563.37	1934.8	4.1233	0.99998	1.8676e-05	3.7351e-05	0.0047109	TRUE
BRUGEN53054	SLA2	326.34/234.46/243.73	372.94/306.13/361.85	243.73	361.85	0.56821	3455.1	821.14	4.1222	0.99998	1.8761e-05	3.7522e-05	0.0047248	TRUE
BRUGEN38175	COPZ2	1007.2/1026.2/915.76	759.1/909.68/704.71	1007.2	759.1	-0.40755	4361.3	3624.4	4.1213	1.8836e-05	0.99998	3.7671e-05	0.0047359	FALSE
BRUGEN30928	SCAF8	87.628/66.238/65.266	126.01/95.908/141.51	66.238	126.01	0.91756	229.22	210.4	4.1206	0.99998	1.8892e-05	3.7784e-05	0.0047424	TRUE
BRUGEN60428	SVOPL	334.4/455.26/270.24	195.11/189.88/229.84	334.4	195.11	-0.7742	9361.7	1143.1	4.1197	1.8968e-05	0.99998	3.7936e-05	0.0047495	FALSE
BRUGEN34001	PAMR1	180.29/178.74/196.82	293.68/259.63/281.12	180.29	281.12	0.63802	137.77	599.11	4.1195	0.99998	1.8982e-05	3.7963e-05	0.0047495	TRUE
BRUGEN17801	SMS	293.1/314.37/348.77	449.16/402.04/458.73	314.37	449.16	0.51339	817.74	1071.6	4.1176	0.99998	1.9145e-05	3.829e-05	0.0047826	TRUE
BRUGEN28485	SLC35A1	314.25/292.29/347.75	173.77/223.79/179.5	314.25	179.5	-0.80449	802.08	1071.2	4.1172	1.9178e-05	0.99998	3.8355e-05	0.0047831	FALSE
BRUGEN29952	ADRM1	353.53/515.19/364.06	544.68/509.57/490.07	364.06	509.57	0.48398	11475	1249.4	4.1167	0.99998	1.9219e-05	3.8439e-05	0.0047858	TRUE
BRUGEN67556	CLEC18C	95.685/151.4/96.879	169.7/165.66/187.1	96.879	169.7	0.80243	1487.1	313.01	4.1163	0.99998	1.9252e-05	3.8504e-05	0.0047861	TRUE
BRUGEN65311	YPEL4	263.89/237.62/242.71	333.31/360.38/399.84	242.71	360.38	0.56837	237.3	817.55	4.1155	0.99998	1.9315e-05	3.8629e-05	0.004794	TRUE
BRUGEN23308	MCM3AP	402.89/243.93/255.97	357.7/376.85/418.84	255.97	376.85	0.55625	10865	864.31	4.1119	0.99998	1.962e-05	3.924e-05	0.0048621	TRUE
BRUGEN64418	ZFC3H1	197.41/169.28/220.27	98.571/92.033/65.532	197.41	92.033	-1.0927	657.14	658.73	4.1059	2.0137e-05	0.99998	4.0273e-05	0.0049821	FALSE
BRUGEN35945	R3HCC1L	346.48/352.22/432.39	428.83/530.89/494.82	352.22	494.82	0.48924	3229.9	1206.9	4.1046	0.99998	2.025e-05	4.0501e-05	0.0050023	TRUE
BRUGEN54509	TMEM209	171.23/159.81/123.39	254.05/244.13/305.82	159.81	254.05	0.66539	728.33	528.16	4.1005	0.99998	2.0616e-05	4.1232e-05	0.0050784	TRUE
BRUGEN73533	DNAJC25	212.52/223.95/305.93	336.36/325.51/430.23	223.95	336.36	0.58469	3426.1	751.59	4.1004	0.99998	2.0625e-05	4.125e-05	0.0050784	TRUE
BRUGEN29638	HNRNPA0	186.33/153.5/178.46	284.53/206.35/278.28	178.46	278.28	0.63801	342.42	592.76	4.0997	0.99998	2.0686e-05	4.1372e-05	0.0050784	TRUE
BRUGEN10103	KCNN1	507.64/548.83/551.7	749.95/727.55/728.45	548.83	728.45	0.40782	852.69	1919.7	4.0996	0.99998	2.069e-05	4.1379e-05	0.0050784	TRUE
BRUGEN15621	PZP	92.664/83.061/90.761	211.37/160.82/137.71	90.761	160.82	0.81841	31.454	292.38	4.097	0.99998	2.0927e-05	4.1853e-05	0.0051284	TRUE
BRUGEN43935	PCDHGA3	1061.6/972.55/896.39	690/730.45/880.41	972.55	730.45	-0.41249	6865.7	3493.9	4.0957	2.1043e-05	0.99998	4.2086e-05	0.0051429	FALSE
BRUGEN57622	LYSMD3	300.15/198.72/158.07	264.21/304.19/309.62	198.72	304.19	0.61178	5970.7	663.27	4.0956	0.99998	2.1052e-05	4.2104e-05	0.0051429	TRUE
BRUGEN49352	RNF219	806.78/720.21/936.16	587.36/499.89/737.95	806.78	587.36	-0.45726	12117	2873.1	4.0935	2.1243e-05	0.99998	4.2486e-05	0.0051813	FALSE
BRUGEN67044	TIPRL	175.26/185.05/227.41	286.57/309.04/264.03	185.05	286.57	0.62823	945.31	615.64	4.0915	0.99998	2.1425e-05	4.285e-05	0.0052066	TRUE
BRUGEN23374	GYG2	257.85/261.8/258	275.39/378.79/410.29	258	378.79	0.55222	7.2121	871.51	4.0914	0.99998	2.1437e-05	4.2873e-05	0.0052066	TRUE
BRUGEN29950	ADRM1	746.35/775.94/807.67	990.79/972.65/1115	775.94	990.79	0.35224	941.22	2758.2	4.091	0.99998	2.1474e-05	4.2948e-05	0.0052066	TRUE
BRUGEN56865	HOGA1	335.4/272.31/281.46	369.9/407.85/412.19	281.46	407.85	0.53353	1496.7	954.54	4.0909	0.99998	2.1481e-05	4.2962e-05	0.0052066	TRUE
BRUGEN52357	SESN2	817.86/806.43/844.38	1038.6/1008.5/1202.4	817.86	1038.6	0.34428	417.03	2914.4	4.088	0.99998	2.1752e-05	4.3504e-05	0.005264	TRUE
BRUGEN71097	HES5	596.27/964.14/453.8	458.3/374.91/409.34	596.27	409.34	-0.54157	77811	2093.6	4.0854	2.2004e-05	0.99998	4.4009e-05	0.0053168	FALSE
BRUGEN03709	COX6A1	672.82/627.69/621.05	807.88/819.58/879.46	627.69	819.58	0.3843	1040.5	2209.2	4.0826	0.99998	2.2269e-05	4.4538e-05	0.0053724	TRUE
BRUGEN19314	TSPAN4	890.38/928.39/884.15	1156.4/1022.1/1120.7	890.38	1120.7	0.33158	741.82	3185.5	4.0808	0.99998	2.2441e-05	4.4883e-05	0.0054055	TRUE
BRUGEN54079	COX4I2	580.16/515.19/444.63	687.96/754.67/615.43	515.19	687.96	0.41653	4600	1796.7	4.0761	0.99998	2.2895e-05	4.5789e-05	0.0054871	TRUE
BRUGEN49917	CCDC82	511.67/487.85/562.92	706.26/635.51/683.82	511.67	683.82	0.4177	1597.1	1783.8	4.076	0.99998	2.2911e-05	4.5821e-05	0.0054871	TRUE
BRUGEN18660	TAF9	104.75/72.547/137.67	179.87/164.69/200.4	104.75	179.87	0.77426	1060.4	339.63	4.076	0.99998	2.2912e-05	4.5824e-05	0.0054871	TRUE
BRUGEN24666	NRXN2	427.06/425.82/381.4	610.73/484.39/582.19	425.82	582.19	0.45035	987.34	1472	4.0759	0.99998	2.2922e-05	4.5844e-05	0.0054871	TRUE
BRUGEN27588	STUB1	76.548/47.313/42.831	104.67/96.877/83.578	47.313	96.877	1.0186	437.39	148.05	4.0734	0.99998	2.3164e-05	4.6329e-05	0.0055322	TRUE
BRUGEN19345	TMSB4X	380.73/281.78/369.16	221.53/279.97/224.14	369.16	224.14	-0.71733	3885	1267.7	4.0731	2.3198e-05	0.99998	4.6396e-05	0.0055322	FALSE
BRUGEN13438	PCNT	100.72/53.622/57.108	111.78/79.439/113.02	57.108	111.78	0.95673	957.15	180.2	4.0729	0.99998	2.3217e-05	4.6434e-05	0.0055322	TRUE
BRUGEN15314	PTEN	411.95/485.75/445.64	605.65/439.82/636.33	445.64	605.65	0.44174	1371.8	1543.7	4.0724	0.99998	2.3262e-05	4.6524e-05	0.0055343	TRUE
BRUGEN71980	PTRHD1	154.1/157.71/149.91	245.92/248.01/222.24	154.1	245.92	0.67081	15.307	508.45	4.0719	0.99998	2.332e-05	4.664e-05	0.0055396	TRUE
BRUGEN73787	BTBD18	368.64/432.13/363.04	506.07/513.45/605.94	368.64	513.45	0.4769	2030.9	1265.8	4.0701	0.99998	2.3499e-05	4.6998e-05	0.0055736	TRUE
BRUGEN66429	RNF169	617.42/588.79/603.71	882.06/701.39/791.14	603.71	791.14	0.3895	205.38	2121	4.0697	0.99998	2.3539e-05	4.7078e-05	0.0055746	TRUE
BRUGEN29941	PAPD7	682.89/618.23/582.3	807.88/820.55/761.7	618.23	807.88	0.38545	2736.3	2174.4	4.0671	0.99998	2.3801e-05	4.7603e-05	0.0056281	TRUE
BRUGEN66203	GAS2L2	660.73/581.43/673.06	464.4/468.88/454.93	660.73	464.4	-0.50777	3220.7	2331.1	4.0664	2.3875e-05	0.99998	4.775e-05	0.0056369	FALSE
BRUGEN08963	HSPB2	367.63/443.69/363.04	566.02/396.23/511.91	367.63	511.91	0.47653	2903	1262.2	4.061	0.99998	2.4429e-05	4.8859e-05	0.005759	TRUE
BRUGEN55796	TMEM259	604.33/543.58/535.39	720.48/597.73/743.65	543.58	720.48	0.40583	1879	1900.4	4.0581	0.99998	2.4739e-05	4.9478e-05	0.0058231	TRUE
BRUGEN47469	PDF	803.76/953.62/911.69	679.84/608.39/875.66	911.69	679.84	-0.42281	6703.6	3265.3	4.0574	2.4816e-05	0.99998	4.9631e-05	0.0058323	FALSE
BRUGEN66131	DEFB108B	196.41/152.45/172.34	254.05/269.32/269.73	172.34	269.32	0.64103	487.33	571.53	4.0564	0.99998	2.4916e-05	4.9832e-05	0.0058471	TRUE
BRUGEN39509	TUBA8	357.56/392.17/330.41	539.6/461.13/499.57	357.56	499.57	0.48134	967.62	1226.1	4.0555	0.99997	2.5013e-05	5.0027e-05	0.005861	TRUE
BRUGEN73473	ARGFX	686.92/655.02/640.42	427.82/460.17/630.63	655.02	460.17	-0.50846	615.28	2310	4.0542	2.5149e-05	0.99997	5.0298e-05	0.0058839	FALSE
BRUGEN43199	ARFGAP1	476.41/428.97/390.58	522.32/620.98/585.04	428.97	585.04	0.44676	1862.4	1483.4	4.0522	0.99997	2.5365e-05	5.0729e-05	0.005918	TRUE
BRUGEN75784	MTRNR2L3	843.04/754.91/787.27	966.4/1001.7/1070.4	787.27	1001.7	0.34714	2078.7	2800.4	4.0522	0.99997	2.5371e-05	5.0743e-05	0.005918	TRUE
BRUGEN41277	TTC22	167.2/158.76/197.84	292.66/262.54/230.79	167.2	262.54	0.64785	504.99	553.7	4.0517	0.99997	2.5426e-05	5.0852e-05	0.0059219	TRUE
BRUGEN71604	OR52E4	46.332/66.238/47.93	97.555/77.502/98.773	47.93	97.555	1.0102	168.88	150.07	4.051	0.99997	2.5504e-05	5.1007e-05	0.0059278	TRUE
BRUGEN57809	MRPL54	446.2/393.23/424.23	485.74/579.32/604.99	424.23	579.32	0.44862	721.91	1466.2	4.0504	0.99997	2.5562e-05	5.1124e-05	0.0059278	TRUE
BRUGEN60225	POU5F2	262.88/305.96/239.65	257.1/383.63/405.54	262.88	383.63	0.54358	1197.7	888.75	4.0504	0.99997	2.5566e-05	5.1132e-05	0.0059278	TRUE
BRUGEN37891	NAA20	84.606/52.57/44.87	119.91/104.63/71.231	52.57	104.63	0.97948	542.79	165.27	4.0493	0.99997	2.5686e-05	5.1372e-05	0.0059466	TRUE
BRUGEN43751	FAM212B	387.78/333.3/326.33	470.5/469.85/414.09	333.3	469.85	0.49416	1508.4	1139.2	4.046	0.99997	2.6049e-05	5.2098e-05	0.0060217	TRUE
BRUGEN08498	HMGCL	893.4/806.43/840.3	618.86/744.98/615.43	840.3	618.86	-0.44067	1983.5	2998.2	4.0441	2.6262e-05	0.99997	5.2524e-05	0.0060619	FALSE
BRUGEN43685	UNC45A	180.29/146.15/186.62	281.49/211.19/279.22	180.29	279.22	0.62827	603.01	599.11	4.0419	0.99997	2.6506e-05	5.3012e-05	0.0061091	TRUE
BRUGEN45443	TMIGD3	381.73/401.64/381.4	363.8/235.41/229.84	381.73	235.41	-0.69505	198.1	1312.9	4.0383	2.6924e-05	0.99997	5.3847e-05	0.0061961	FALSE
BRUGEN64309	POLR3H	145.04/96.729/94.84	178.85/130.78/168.1	96.729	168.1	0.79106	1168.7	312.5	4.0376	0.99997	2.7e-05	5.3999e-05	0.0062009	TRUE
BRUGEN33451	STX12	526.77/418.46/554.76	353.64/349.73/461.58	526.77	353.64	-0.57358	6257.7	1839	4.0374	2.7024e-05	0.99997	5.4049e-05	0.0062009	FALSE
BRUGEN34359	UPF2	169.21/123.01/127.47	269.29/199.57/209.89	127.47	209.89	0.71505	881.03	416.98	4.0362	0.99997	2.7156e-05	5.4313e-05	0.006222	TRUE
BRUGEN65644	HNRNPA3	497.56/557.24/473.18	721.5/665.55/585.04	497.56	665.55	0.41892	2078.2	1732.4	4.0358	0.99997	2.7204e-05	5.4409e-05	0.0062237	TRUE
BRUGEN66447	CNIH2	416.99/394.28/397.72	436.96/560.92/547.05	397.72	547.05	0.45896	191.62	1370.5	4.034	0.99997	2.7419e-05	5.4838e-05	0.0062606	TRUE
BRUGEN16101	RGS4	74.534/91.472/71.385	145.32/128.85/136.76	74.534	136.76	0.86699	148.41	238	4.0338	0.99997	2.7446e-05	5.4893e-05	0.0062606	TRUE
BRUGEN57127	CGB2	80.577/98.832/58.128	145.32/111.41/171.9	80.577	145.32	0.84285	418.61	258.19	4.029	0.99997	2.8013e-05	5.6026e-05	0.0063805	TRUE
BRUGEN18694	TALDO1	741.31/749.65/739.34	883.07/954.24/947.85	741.31	947.85	0.35415	36.72	2629.5	4.0277	0.99997	2.8163e-05	5.6327e-05	0.0064053	TRUE
BRUGEN00219	ACTN3	130.94/129.32/121.35	244.9/212.16/192.8	129.32	212.16	0.70985	33.054	423.31	4.0263	0.99997	2.8336e-05	5.6673e-05	0.0064313	TRUE
BRUGEN42914	NHP2	102.74/45.21/48.95	137.19/98.815/96.874	48.95	98.815	0.99878	1453.5	153.4	4.0261	0.99997	2.8361e-05	5.6721e-05	0.0064313	TRUE
BRUGEN06620	NR5A1	710.09/803.27/676.12	836.33/911.61/914.6	710.09	911.61	0.35998	4918.8	2513.7	4.0195	0.99997	2.9156e-05	5.8312e-05	0.0065939	TRUE
BRUGEN01976	C3	746.35/710.75/766.88	953.19/700.42/985.83	746.35	953.19	0.3525	844.33	2648.2	4.0195	0.99997	2.9163e-05	5.8326e-05	0.0065939	TRUE
BRUGEN76041	NT5C1B-RDH14	963.9/1018.8/1161.5	1159.5/1267.2/1262.2	1018.8	1262.2	0.30879	11692	3668.1	4.0188	0.99997	2.9245e-05	5.849e-05	0.0066028	TRUE
BRUGEN12134	MYO10	214.54/207.13/222.31	322.13/334.23/306.77	214.54	322.13	0.5842	57.687	718.59	4.0139	0.99997	2.9867e-05	5.9735e-05	0.0067278	TRUE
BRUGEN31287	ELL2	232.67/192.41/217.21	345.51/325.51/276.38	217.21	325.51	0.58137	427.09	727.96	4.0137	0.99997	2.9886e-05	5.9771e-05	0.0067278	TRUE
BRUGEN54831	TRIM5	377.71/317.52/301.86	405.46/449.51/473.92	317.52	449.51	0.50016	1933.7	1082.8	4.0109	0.99997	3.024e-05	6.048e-05	0.0067978	TRUE
BRUGEN71984	SULT6B1	239.72/261.8/192.74	221.53/353.6/403.64	239.72	353.6	0.55886	1347.3	807.01	4.0089	0.99997	3.0504e-05	6.1009e-05	0.0068472	TRUE
BRUGEN56909	KTI12	289.07/280.72/326.33	414.61/451.45/400.79	289.07	414.61	0.51882	728.97	981.56	4.007	0.99997	3.0753e-05	6.1506e-05	0.006893	TRUE
BRUGEN58217	GYLTL1B	544.9/427.92/476.24	639.19/530.89/652.47	476.24	639.19	0.42378	3524.7	1654.8	4.0057	0.99997	3.0917e-05	6.1834e-05	0.0069166	TRUE
BRUGEN55100	SERPINB11	857.14/592.99/631.25	820.07/985.24/626.83	631.25	820.07	0.37702	26246	2222.3	4.0055	0.99997	3.0947e-05	6.1895e-05	0.0069166	TRUE
BRUGEN59563	SPATA25	431.09/358.53/373.24	551.79/467.92/516.66	373.24	516.66	0.46804	1781.4	1282.4	4.005	0.99997	3.1005e-05	6.2009e-05	0.0069194	TRUE
BRUGEN62757	CREBRF	312.24/235.51/248.83	364.81/311.94/365.65	248.83	364.81	0.55018	2099	839.11	4.0041	0.99997	3.1132e-05	6.2264e-05	0.0069379	TRUE
BRUGEN76215	KIAA2012	240.72/207.13/192.74	290.63/320.66/312.47	207.13	312.47	0.59085	667.91	692.65	4.0025	0.99997	3.1336e-05	6.2672e-05	0.0069733	TRUE
BRUGEN56941	IZUMO4	752.39/760.16/682.23	1046.7/959.08/822.48	752.39	959.08	0.34976	2491.1	2670.7	3.9996	0.99997	3.1724e-05	6.3449e-05	0.0070463	TRUE
BRUGEN35965	TP53TG5	271.95/312.27/327.35	473.55/442.73/352.36	312.27	442.73	0.50228	926.56	1064.1	3.9994	0.99997	3.1755e-05	6.351e-05	0.0070463	TRUE
BRUGEN17727	SLN	770.52/795.91/776.05	560.94/581.26/566.05	776.05	566.05	-0.45455	212.49	2758.7	3.9984	3.1888e-05	0.99997	6.3777e-05	0.0070657	FALSE
BRUGEN20033	UQCRH	469.36/627.69/481.34	460.34/661.67/644.88	481.34	644.88	0.42122	10781	1673.3	3.9979	0.99997	3.1957e-05	6.3913e-05	0.0070707	TRUE
BRUGEN61059	SIRPA	455.26/380.61/387.52	533.5/571.57/475.82	387.52	533.5	0.46022	2318.5	1333.7	3.9974	0.99997	3.2023e-05	6.4045e-05	0.0070752	TRUE
BRUGEN04747	DHFR	48.346/23.131/24.475	58.939/59.095/18.995	24.475	58.939	1.2344	285.83	74.396	3.9958	0.99997	3.2317e-05	6.4634e-05	0.0071301	TRUE
BRUGEN54783	ATCAY	314.25/275.47/295.74	340.43/422.38/476.77	295.74	422.38	0.51278	376.81	1005.2	3.9945	0.99997	3.2419e-05	6.4839e-05	0.0071425	TRUE
BRUGEN71634	OR5D16	559/493.11/529.27	829.22/517.32/700.91	529.27	700.91	0.40457	1095.9	1848.1	3.9927	0.99997	3.2662e-05	6.5324e-05	0.0071858	TRUE
BRUGEN44304	ASAH2	140/123.01/155.01	225.6/185.04/240.29	140	225.6	0.68439	256.87	459.92	3.9911	0.99997	3.2879e-05	6.5759e-05	0.0072131	TRUE
BRUGEN67721	SSC5D	140/134.58/153.99	225.6/158.88/239.34	140	225.6	0.68439	112.48	459.92	3.9911	0.99997	3.2879e-05	6.5759e-05	0.0072131	TRUE
BRUGEN28903	EBP	293.1/266.01/231.49	146.33/146.28/156.71	266.01	146.33	-0.85779	962.68	899.79	3.9896	3.3099e-05	0.99997	6.6197e-05	0.0072509	FALSE
BRUGEN54689	PPP1R16A	1158.3/1169.2/1046.3	951.16/899.99/876.61	1158.3	899.99	-0.36367	6331.1	4195.6	3.9879	3.3333e-05	0.99997	6.6665e-05	0.0072919	FALSE
BRUGEN21607	FZD8	437.13/378.51/379.36	523.34/546.39/444.48	379.36	523.34	0.46314	1669.2	1304.4	3.9866	0.99997	3.3507e-05	6.7013e-05	0.0073196	TRUE
BRUGEN72043	LCN9	608.36/495.21/456.86	632.07/660.7/674.32	495.21	660.7	0.41523	7136.4	1723.9	3.9859	0.99997	3.3617e-05	6.7235e-05	0.0073334	TRUE
BRUGEN26644	RCE1	730.23/721.26/715.89	922.71/826.36/1024.8	721.26	922.71	0.35491	54.662	2555.1	3.9852	0.99997	3.3716e-05	6.7432e-05	0.0073446	TRUE
BRUGEN13825	PGM5	465.33/461.57/455.84	586.35/620.98/685.72	461.57	620.98	0.42721	23.475	1601.5	3.9835	0.99997	3.395e-05	6.79e-05	0.0073851	TRUE
BRUGEN05215	E2F4	723.18/694.98/785.23	924.74/934.86/882.31	723.18	924.74	0.35426	2322.9	2562.2	3.9819	0.99997	3.4182e-05	6.8365e-05	0.0074253	TRUE
BRUGEN49238	BIRC7	422.02/363.79/359.98	434.93/520.23/504.31	363.79	504.31	0.47013	1703	1248.4	3.9773	0.99997	3.4852e-05	6.9704e-05	0.0075565	TRUE
BRUGEN06979	GCH1	353.53/279.67/466.04	367.86/523.14/491.97	353.53	491.97	0.47558	9056.6	1211.6	3.9771	0.99997	3.4884e-05	6.9768e-05	0.0075565	TRUE
BRUGEN28038	PGRMC2	389.79/353.27/429.33	298.76/244.13/244.08	389.79	244.13	-0.67285	1448.4	1341.9	3.9763	3.4993e-05	0.99997	6.9986e-05	0.0075695	FALSE
BRUGEN27278	LHFPL2	842.03/898.95/814.81	1062.9/880.61/1059.9	842.03	1059.9	0.33165	1990.5	3004.6	3.9749	0.99996	3.5203e-05	7.0406e-05	0.0076044	TRUE
BRUGEN37323	DCAF8	983.04/992.53/1135	1154.4/1246.8/1229.9	992.53	1229.9	0.30911	10197	3569.1	3.9737	0.99996	3.5389e-05	7.0778e-05	0.0076299	TRUE
BRUGEN60604	RPP25L	494.54/391.12/409.95	563.99/464.04/559.4	409.95	559.4	0.44748	3755	1414.6	3.9734	0.99996	3.542e-05	7.084e-05	0.0076299	TRUE
BRUGEN26070	KEAP1	734.26/739.14/616.97	936.93/795.36/958.29	734.26	936.93	0.35123	6890.5	2603.3	3.9722	0.99996	3.5606e-05	7.1213e-05	0.0076594	TRUE
BRUGEN10959	SMAD2	385.76/350.12/389.56	530.45/372.01/661.97	385.76	530.45	0.45849	642.51	1327.4	3.9713	0.99996	3.5734e-05	7.1467e-05	0.0076761	TRUE
BRUGEN50928	TM2D3	438.14/394.28/357.94	540.62/520.23/545.15	394.28	540.62	0.45441	1622	1358.1	3.971	0.99996	3.5785e-05	7.1571e-05	0.0076766	TRUE
BRUGEN56660	ZNF101	224.61/231.31/251.89	368.88/332.29/341.91	231.31	341.91	0.56178	234.16	777.44	3.9666	0.99996	3.645e-05	7.2901e-05	0.0078084	TRUE
BRUGEN53124	TMEM117	469.36/507.83/518.05	291.65/341.01/500.52	507.83	341.01	-0.57315	792.05	1769.8	3.9654	3.6641e-05	0.99996	7.3283e-05	0.0078385	FALSE
BRUGEN62237	BPIFB4	368.64/398.48/361	472.53/509.57/531.86	368.64	509.57	0.46599	474.42	1265.8	3.9612	0.99996	3.7294e-05	7.4587e-05	0.007967	TRUE
BRUGEN59603	CSTL1	635.55/576.17/594.53	775.36/737.23/851.92	594.53	775.36	0.38254	1009.9	2087.3	3.9579	0.99996	3.78e-05	7.56e-05	0.0080642	TRUE
BRUGEN11674	MOCS2	115.83/79.907/91.78	158.53/159.85/174.75	91.78	159.85	0.7938	359.68	295.81	3.9575	0.99996	3.7863e-05	7.5726e-05	0.0080665	TRUE
BRUGEN46569	RPRD1B	603.32/530.96/608.81	737.76/796.33/785.44	603.32	785.44	0.38002	2633.3	2119.6	3.9557	0.99996	3.815e-05	7.6301e-05	0.0081165	TRUE
BRUGEN50937	CFAP43	426.05/428.97/519.07	581.26/501.82/653.42	428.97	581.26	0.43743	4062.9	1483.4	3.9541	0.99996	3.8406e-05	7.6813e-05	0.0081598	TRUE
BRUGEN45837	USP35	617.42/497.31/540.48	742.84/621.95/712.31	540.48	712.31	0.39761	3891.6	1889.1	3.9533	0.99996	3.8548e-05	7.7096e-05	0.0081786	TRUE
BRUGEN63764	APCDD1L	109.79/131.43/155.01	213.4/206.35/256.43	131.43	213.4	0.69513	512.17	430.51	3.9509	0.99996	3.893e-05	7.7861e-05	0.0082484	TRUE
BRUGEN30927	SCAF8	190.36/184/199.88	290.63/289.66/271.63	190.36	289.66	0.60303	65.531	634.15	3.9432	0.99996	4.0203e-05	8.0405e-05	0.0085063	TRUE
BRUGEN54733	C11orf70	247.77/288.08/247.81	361.77/377.82/320.06	247.81	361.77	0.54401	811.14	835.52	3.9425	0.99996	4.0322e-05	8.0643e-05	0.0085199	TRUE
BRUGEN39150	HMP19	770.52/888.44/877.01	656.46/927.11/601.19	877.01	656.46	-0.41733	5735.6	3135.4	3.9387	4.0955e-05	0.99996	8.191e-05	0.0086419	FALSE
BRUGEN32672	KIAA0368	312.24/216.59/216.19	342.46/322.6/244.08	216.59	322.6	0.57261	4574.3	725.78	3.9351	0.99996	4.1588e-05	8.3177e-05	0.0087637	TRUE
BRUGEN21461	RBM10	124.89/106.19/96.879	174.79/179.22/196.6	106.19	179.22	0.74959	218.26	344.52	3.9346	0.99996	4.1668e-05	8.3335e-05	0.0087684	TRUE
BRUGEN62795	MARVELD2	42.303/28.388/23.455	65.037/31.001/67.432	28.388	65.037	1.168	108.98	86.852	3.9325	0.99996	4.2085e-05	8.4171e-05	0.0088443	TRUE
BRUGEN41768	PNPO	460.3/565.66/438.51	491.84/619.04/617.33	460.3	617.33	0.42269	5787.6	1596.9	3.9297	0.99996	4.2519e-05	8.5038e-05	0.0089211	TRUE
BRUGEN02662	SCARB1	195.4/207.13/147.87	295.71/196.66/299.17	195.4	295.71	0.59528	1198.4	651.7	3.9295	0.99996	4.2567e-05	8.5133e-05	0.0089211	TRUE
BRUGEN51547	OR4A16	356.55/294.39/288.6	418.67/334.23/424.54	294.39	418.67	0.50663	1948.8	1000.5	3.9292	0.99996	4.2623e-05	8.5247e-05	0.0089211	TRUE
BRUGEN74879	ZNF286B	192.38/150.35/149.91	237.79/256.72/220.34	150.35	237.79	0.65785	883.25	495.51	3.9281	0.99996	4.2815e-05	8.5631e-05	0.0089491	TRUE
BRUGEN50199	ALG13	251.8/177.69/91.78	120.93/82.345/53.186	177.69	82.345	-1.1003	6436.6	590.07	3.9249	4.3376e-05	0.99996	8.6753e-05	0.0090542	FALSE
BRUGEN46373	TRIB3	343.46/287.03/281.46	409.53/341.01/429.28	287.03	409.53	0.51124	1607.5	974.32	3.9243	0.99996	4.349e-05	8.698e-05	0.0090658	TRUE
BRUGEN54327	ZC3H10	236.7/174.53/206	308.92/265.44/320.06	206	308.92	0.58231	966.19	688.7	3.9221	0.99996	4.3894e-05	8.7788e-05	0.0091361	TRUE
BRUGEN18926	DYNLT1	854.12/910.52/908.63	684.92/843.8/585.99	908.63	684.92	-0.40724	1487.3	3253.9	3.9218	4.3946e-05	0.99996	8.7891e-05	0.0091361	FALSE
BRUGEN04752	DHPS	169.21/130.37/111.16	71.134/49.407/39.889	130.37	49.407	-1.382	938.86	426.91	3.9187	4.4517e-05	0.99996	8.9034e-05	0.0092425	FALSE
BRUGEN26839	SMC4	115.83/107.24/44.87	38.615/32.938/34.191	107.24	34.191	-1.621	1982	348.08	3.9156	4.5094e-05	0.99995	9.0187e-05	0.0093497	FALSE
BRUGEN21574	BRAP	102.74/111.45/128.49	185.96/185.04/189	111.45	185.96	0.73349	183.2	362.36	3.9145	0.99995	4.53e-05	9.0601e-05	0.00938	TRUE
BRUGEN03953	CRYBA4	510.66/560.4/490.52	675.77/720.77/486.27	510.66	675.77	0.40349	1439.9	1780.2	3.9134	0.99995	4.551e-05	9.1021e-05	0.0094109	TRUE
BRUGEN20833	ZNF215	329.36/281.78/255.97	428.83/343.91/402.69	281.78	402.69	0.51359	1465.2	955.66	3.9114	0.99995	4.5887e-05	9.1773e-05	0.009476	TRUE
BRUGEN61363	FBXL14	59.426/95.678/66.286	58.939/123.03/134.86	66.286	123.03	0.88236	455.47	210.55	3.9108	0.99995	4.5989e-05	9.1978e-05	0.0094783	TRUE
BRUGEN31233	MAPRE1	237.7/238.67/287.58	351.6/309.04/349.51	238.67	349.51	0.5484	1196.6	803.32	3.9106	0.99995	4.6037e-05	9.2075e-05	0.0094783	TRUE
BRUGEN42317	C5orf22	476.41/444.74/538.45	603.62/635.51/723.71	476.41	635.51	0.41495	2425.5	1655.4	3.9104	0.99995	4.6081e-05	9.2162e-05	0.0094783	TRUE
BRUGEN25014	SLC4A8	114.82/107.24/87.701	214.42/180.19/168.1	107.24	180.19	0.74324	219.67	348.08	3.91	0.99995	4.6154e-05	9.2309e-05	0.0094807	TRUE
BRUGEN59147	NR2C2AP	166.19/157.71/140.73	246.94/211.19/246.93	157.71	246.93	0.64356	180.13	520.9	3.9093	0.99995	4.6277e-05	9.2555e-05	0.0094934	TRUE
BRUGEN04064	CSNK1A1	191.37/167.17/158.07	259.13/246.07/291.57	167.17	259.13	0.62928	334.23	553.61	3.9082	0.99995	4.6487e-05	9.2973e-05	0.0095237	TRUE
BRUGEN45159	JPH2	178.28/209.23/158.07	273.36/242.19/292.52	178.28	273.36	0.61386	683.26	592.11	3.9074	0.99995	4.6653e-05	9.3306e-05	0.0095452	TRUE
BRUGEN40446	TMED9	587.21/578.27/616.97	794.67/669.42/764.54	587.21	764.54	0.38016	482.8	2060.3	3.9069	0.99995	4.6746e-05	9.3491e-05	0.0095515	TRUE
BRUGEN46777	PLEKHA2	266.91/305.96/339.59	431.88/384.6/453.98	305.96	431.88	0.49593	1327.8	1041.6	3.9017	0.99995	4.7753e-05	9.5507e-05	0.0097333	TRUE
BRUGEN33241	ELP5	375.69/287.03/253.93	515.21/408.82/330.51	287.03	408.82	0.50876	4478.2	974.32	3.9017	0.99995	4.7761e-05	9.5522e-05	0.0097333	TRUE
BRUGEN36009	PGAP2	1194.6/1318.5/1249.2	1512.1/1520/1437.9	1249.2	1512.1	0.27531	3890.9	4541.2	3.9008	0.99995	4.7943e-05	9.5886e-05	0.0097575	TRUE
BRUGEN21886	BFSP2	393.82/373.25/243.73	225.6/323.57/233.64	373.25	233.64	-0.67356	8599.4	1282.4	3.8986	4.8374e-05	0.99995	9.6748e-05	0.0098324	FALSE
BRUGEN11427	SCGB2A1	730.23/648.72/683.25	912.54/779.86/874.71	683.25	874.71	0.35593	1699.8	2414.4	3.8965	0.99995	4.8788e-05	9.7576e-05	0.0098871	TRUE
BRUGEN14273	PMS1	160.15/152.45/132.57	239.82/207.32/244.08	152.45	239.82	0.65017	227.24	502.76	3.8965	0.99995	4.8793e-05	9.7587e-05	0.0098871	TRUE
BRUGEN32047	PSME4	208.49/222.9/208.04	114.83/105.6/93.075	208.49	105.6	-0.97475	103.84	697.43	3.8963	4.8835e-05	0.99995	9.7669e-05	0.0098871	FALSE
BRUGEN68492	LIN9	459.29/430.02/423.21	580.25/460.17/621.13	430.02	580.25	0.43138	451.47	1487.2	3.8955	0.99995	4.9007e-05	9.8014e-05	0.009909	TRUE
BRUGEN71601	OR52E8	299.14/273.36/282.48	375.99/403.01/416.94	282.48	403.01	0.51114	180.37	958.16	3.8938	0.99995	4.9346e-05	9.8692e-05	0.0099646	TRUE
BRUGEN37841	LACTB2	191.37/199.77/158.07	83.328/124.97/93.075	191.37	93.075	-1.032	589.84	637.66	3.8926	4.9585e-05	0.99995	9.917e-05	0.0099735	FALSE
BRUGEN22230	CHST1	424.04/342.76/345.71	531.47/467.92/479.62	345.71	479.62	0.47119	3072.2	1183.6	3.8925	0.99995	4.9604e-05	9.9207e-05	0.0099735	TRUE
BRUGEN36372	ZC3H7A	161.15/187.15/135.63	251/221.85/295.37	161.15	251	0.63606	663.6	532.79	3.8924	0.99995	4.9625e-05	9.9249e-05	0.0099735	TRUE
BRUGEN04185	CTF1	301.16/243.93/265.14	336.36/381.7/399.84	265.14	381.7	0.52399	873.6	896.75	3.8921	0.99995	4.9687e-05	9.9373e-05	0.0099735	TRUE
BRUGEN09772	ITGAD	687.93/624.53/501.73	814.99/806.99/729.4	624.53	806.99	0.36924	9549.4	2197.6	3.892	0.99995	4.9712e-05	9.9425e-05	0.0099735	TRUE
BRUGEN58488	PLD4	215.54/216.59/214.15	320.1/262.54/324.81	215.54	320.1	0.56837	1.5119	722.11	3.8909	0.99995	4.9931e-05	9.9863e-05	0.010004	TRUE
BRUGEN37973	SDF4	508.64/487.85/395.68	997.9/648.11/567.95	487.85	648.11	0.40906	4464.4	1697.1	3.8902	0.99995	5.009e-05	0.00010018	0.010023	TRUE
BRUGEN29965	OGFR	328.35/257.59/243.73	384.12/288.69/372.3	257.59	372.3	0.52965	2599.5	870.06	3.8888	0.99995	5.0378e-05	0.00010076	0.010063	TRUE
BRUGEN51737	CCDC130	378.71/420.56/482.36	272.34/264.47/343.81	420.56	272.34	-0.62504	2785	1452.9	3.8885	5.0428e-05	0.99995	0.00010086	0.010063	FALSE
BRUGEN16135	RHD	486.48/455.26/442.59	644.27/584.17/609.74	455.26	609.74	0.4207	567.86	1578.6	3.888	0.99995	5.0528e-05	0.00010106	0.010063	TRUE
BRUGEN32616	CRTC1	391.81/322.78/323.27	477.61/452.42/382.75	323.27	452.42	0.48363	2348.7	1103.3	3.888	0.99995	5.0546e-05	0.00010109	0.010063	TRUE
BRUGEN61323	TMEM120B	193.39/137.73/142.77	271.32/178.25/226.99	142.77	226.99	0.66521	1293.7	469.42	3.8871	0.99995	5.0716e-05	0.00010143	0.010083	TRUE
BRUGEN23464	TOP3B	400.87/370.09/361	619.88/508.6/454.93	370.09	508.6	0.45759	514.95	1271.1	3.8851	0.99995	5.1149e-05	0.0001023	0.010147	TRUE
BRUGEN14684	PPP5C	283.03/312.27/378.34	439/342.94/505.26	312.27	439	0.4901	2610.2	1064.1	3.885	0.99995	5.1169e-05	0.00010234	0.010147	TRUE
BRUGEN31905	TBC1D9	823.9/897.9/885.17	666.62/709.14/661.02	885.17	666.62	-0.40855	1957.9	3166	3.8841	5.1357e-05	0.99995	0.00010271	0.010168	FALSE
BRUGEN57117	EFHC1	456.27/570.91/573.12	375.99/397.2/447.33	570.91	397.2	-0.52232	6574	2000.6	3.8839	5.1402e-05	0.99995	0.0001028	0.010168	FALSE
BRUGEN44535	THAP10	231.66/221.85/295.74	311.97/347.79/340.01	231.66	340.01	0.55159	2101.1	778.67	3.8828	0.99995	5.1622e-05	0.00010324	0.010198	TRUE
BRUGEN22305	CDC14A	162.16/161.92/191.72	252.02/194.72/270.68	162.16	252.02	0.63293	436.85	536.27	3.8802	0.99995	5.2196e-05	0.00010439	0.010298	TRUE
BRUGEN36263	MRPS18B	313.24/376.4/308.99	440.01/501.82/326.71	313.24	440.01	0.48894	2003.5	1067.6	3.8798	0.99995	5.2262e-05	0.00010452	0.010298	TRUE
BRUGEN20472	CNBP	249.79/195.56/275.34	318.07/362.32/377.05	249.79	362.32	0.53477	1796.8	842.51	3.8769	0.99995	5.2898e-05	0.0001058	0.01041	TRUE
BRUGEN38681	AIG1	179.28/126.17/162.15	233.73/251.88/257.38	162.15	251.88	0.6323	794.04	536.22	3.8752	0.99995	5.3275e-05	0.00010655	0.010471	TRUE
BRUGEN21958	DOC2B	493.54/411.1/459.92	333.31/305.16/271.63	459.92	305.16	-0.59022	1756.8	1595.5	3.8744	5.3444e-05	0.99995	0.00010689	0.010491	FALSE
BRUGEN48598	LYNX1	234.68/205.02/207.02	308.92/278.04/339.06	207.02	308.92	0.57522	384.67	692.27	3.8732	0.99995	5.3706e-05	0.00010741	0.010529	TRUE
BRUGEN24337	MAPKAPK2	484.47/473.13/590.45	298.76/325.51/384.65	484.47	325.51	-0.57227	5680.5	1684.7	3.8728	5.3786e-05	0.99995	0.00010757	0.010532	FALSE
BRUGEN47951	SMYD3	790.66/1112.4/1068.7	617.85/828.3/977.29	1068.7	828.3	-0.36729	39614	3856.5	3.8716	5.4052e-05	0.99995	0.0001081	0.01057	FALSE
BRUGEN36957	UBQLN1	430.08/415.3/375.28	490.82/561.89/627.78	415.3	561.89	0.43521	910.16	1433.9	3.8709	0.99995	5.4212e-05	0.00010842	0.010588	TRUE
BRUGEN33892	ANAPC13	176.26/111.45/119.31	207.3/141.44/195.65	119.31	195.65	0.7088	1652.5	389.13	3.8696	0.99995	5.4512e-05	0.00010902	0.010631	TRUE
BRUGEN69566	TGM6	672.82/791.71/629.21	836.33/865.11/861.42	672.82	861.42	0.35603	8018.2	2375.8	3.8693	0.99995	5.4567e-05	0.00010913	0.010631	TRUE
BRUGEN20289	WNT8B	400.87/385.87/462.98	544.68/457.26/563.2	400.87	544.68	0.44132	2041.4	1381.9	3.8686	0.99995	5.4726e-05	0.00010945	0.010648	TRUE
BRUGEN41689	ANKZF1	387.78/451.05/408.93	719.47/554.14/548	408.93	554.14	0.43746	1110.8	1410.9	3.8657	0.99994	5.5393e-05	0.00011079	0.010765	TRUE
BRUGEN33549	FLRT3	146.05/155.61/173.36	202.22/243.16/253.58	155.61	243.16	0.64068	203.34	513.64	3.8632	0.99994	5.5958e-05	0.00011192	0.010844	TRUE
BRUGEN60290	C5orf24	300.15/349.07/318.17	371.93/465.98/445.43	318.17	445.43	0.4841	639.62	1085.1	3.8631	0.99994	5.5968e-05	0.00011194	0.010844	TRUE
BRUGEN21639	HIST1H2AB	159.14/171.38/160.11	248.97/262.54/201.35	160.11	248.97	0.63373	64.007	529.17	3.863	0.99994	5.6011e-05	0.00011202	0.010844	TRUE
BRUGEN54493	FAM104A	223.6/221.85/198.86	327.22/274.16/328.61	221.85	327.22	0.55859	265.78	744.21	3.8625	0.99994	5.6123e-05	0.00011225	0.010852	TRUE
BRUGEN27711	DSCR3	204.46/223.95/212.11	315.02/221.85/322.91	212.11	315.02	0.56839	99.287	710.11	3.8617	0.99994	5.6298e-05	0.0001126	0.010872	TRUE
BRUGEN71699	OR4D9	110.79/123.01/87.701	188/184.07/153.86	110.79	184.07	0.7272	341.3	360.13	3.8611	0.99994	5.6441e-05	0.00011288	0.010886	TRUE
BRUGEN16013	DPF2	513.68/473.13/473.18	757.07/629.7/594.54	473.18	629.7	0.41152	820.16	1643.7	3.8607	0.99994	5.6531e-05	0.00011306	0.01089	TRUE
BRUGEN15787	RAN	352.53/311.22/311.03	450.17/436.92/378.95	311.22	436.92	0.48811	853.26	1060.3	3.8602	0.99994	5.6643e-05	0.00011329	0.010898	TRUE
BRUGEN21093	HSD17B8	847.07/728.62/712.83	924.74/944.55/891.81	728.62	924.74	0.34345	7139.4	2582.4	3.8592	0.99994	5.6876e-05	0.00011375	0.010929	TRUE
BRUGEN51486	SLC2A10	433.1/404.79/317.15	560.94/463.07/548.95	404.79	548.95	0.43857	4241	1396	3.8584	0.99994	5.7062e-05	0.00011412	0.010951	TRUE
BRUGEN25864	TBKBP1	578.14/485.75/594.53	404.45/458.23/365.65	578.14	404.45	-0.51441	4402.6	2027.1	3.8579	5.7177e-05	0.99994	0.00011435	0.01096	FALSE
BRUGEN68257	SREK1IP1	243.75/217.64/285.54	328.23/367.16/354.25	243.75	354.25	0.53757	1214.1	821.2	3.8563	0.99994	5.7558e-05	0.00011512	0.011019	TRUE
BRUGEN06243	FGF3	551.95/517.29/504.79	710.32/524.1/680.97	517.29	680.97	0.39594	678.87	1804.4	3.8532	0.99994	5.8288e-05	0.00011658	0.011145	TRUE
BRUGEN03626	COL9A3	795.7/794.86/745.46	1044.6/999.77/926	794.86	999.77	0.33052	1220.6	2828.7	3.8528	0.99994	5.8398e-05	0.0001168	0.011153	TRUE
BRUGEN48473	ZSWIM4	805.77/845.33/891.29	976.56/1056.9/1065.6	845.33	1056.9	0.32195	1838.6	3017	3.8524	0.99994	5.8484e-05	0.00011697	0.011155	TRUE
BRUGEN48760	PDCL3	451.23/514.14/440.55	674.75/603.54/535.66	451.23	603.54	0.41878	2035.6	1564	3.8514	0.99994	5.873e-05	0.00011746	0.011188	TRUE
BRUGEN18783	TBXA2R	995.13/927.34/1052.4	1284.5/1225.5/1203.3	995.13	1225.5	0.30014	3938.7	3578.9	3.8507	0.99994	5.8882e-05	0.00011776	0.011204	TRUE
BRUGEN16511	RPS6	36.26/8.4112/8.1583	27.437/17.438/38.94	8.4112	27.437	1.5953	387.8	24.415	3.8506	0.99994	6.1657e-05	0.00012331	0.011524	TRUE
BRUGEN17774	SMARCD3	83.599/60.981/62.207	154.46/116.25/78.829	62.207	116.25	0.89147	229.56	197.04	3.8502	0.99994	5.9002e-05	0.000118	0.011213	TRUE
BRUGEN72285	DEFB132	376.7/371.15/327.35	365.83/508.6/536.61	371.15	508.6	0.45351	974.44	1274.8	3.8499	0.99994	5.9091e-05	0.00011818	0.011216	TRUE
BRUGEN23490	HIST1H2AG	373.68/419.51/403.83	401.4/547.36/585.04	403.83	547.36	0.43778	577.6	1392.5	3.846	0.99994	6.0022e-05	0.00012004	0.011379	TRUE
BRUGEN66058	NKAPL	381.73/482.59/501.73	325.18/279.97/384.65	482.59	325.18	-0.56812	5269.5	1677.9	3.8428	6.0812e-05	0.99994	0.00012162	0.011499	FALSE
BRUGEN71151	NOTCH2NL	353.53/293.34/405.87	272.34/487.29/597.39	353.53	487.29	0.46182	3181.2	1211.6	3.8427	0.99994	6.0835e-05	0.00012167	0.011499	TRUE
BRUGEN58658	FOPNL	415.98/331.19/409.95	270.31/265.44/259.28	409.95	265.44	-0.62514	3119.8	1414.6	3.8422	6.0977e-05	0.99994	0.00012195	0.011499	FALSE
BRUGEN73782	LINC00452	624.47/546.73/599.63	583.3/794.39/775.94	599.63	775.94	0.37132	1707.9	2106	3.8419	0.99994	6.1043e-05	0.00012209	0.011499	TRUE
BRUGEN13228	PABPC3	35.253/53.622/56.088	138.2/52.314/103.52	53.622	103.52	0.93627	171.75	168.73	3.8416	0.99994	6.1112e-05	0.00012222	0.011499	TRUE
BRUGEN01781	BMP4	73.527/53.622/45.89	114.83/55.22/103.52	53.622	103.52	0.93627	227.99	168.73	3.8416	0.99994	6.1112e-05	0.00012222	0.011499	TRUE
BRUGEN01937	BUB1B	3.0216/9.4626/4.0791	18.292/5.8126/17.095	4.0791	17.095	1.833	15.05	11.483	3.8412	0.99993	6.913e-05	0.00013826	0.012567	TRUE
BRUGEN52799	RBM48	281.01/217.64/222.31	327.22/253.82/329.56	222.31	327.22	0.55558	1733.8	745.84	3.8412	0.99994	6.1228e-05	0.00012246	0.011499	TRUE
BRUGEN49462	CCDC121	668.79/609.81/717.93	787.55/855.42/976.34	668.79	855.42	0.35462	2946.3	2360.9	3.8411	0.99994	6.125e-05	0.0001225	0.011499	TRUE
BRUGEN38895	TRMT112	315.26/290.19/279.42	432.9/410.76/363.75	290.19	410.76	0.49985	372.24	985.52	3.8407	0.99994	6.1342e-05	0.00012268	0.011502	TRUE
BRUGEN32624	RRP8	491.52/398.48/410.97	574.15/505.7/555.6	410.97	555.6	0.4341	3322.1	1418.3	3.8403	0.99994	6.1434e-05	0.00012287	0.011505	TRUE
BRUGEN76137	NDUFC2-KCTD14	70.505/92.524/61.187	128.04/129.82/89.276	70.505	128.04	0.85171	285.82	224.57	3.8394	0.99994	6.168e-05	0.00012336	0.011524	TRUE
BRUGEN68435	LURAP1L	224.61/273.36/236.59	366.85/344.88/337.16	236.59	344.88	0.54181	747.99	796.01	3.8383	0.99994	6.1938e-05	0.00012388	0.011558	TRUE
BRUGEN02555	CD3D	89.642/119.86/147.87	200.19/195.69/149.11	119.86	195.69	0.7026	848.8	390.99	3.835	0.99994	6.2778e-05	0.00012556	0.011701	TRUE
BRUGEN04988	DPH2	162.16/159.81/151.95	94.506/71.689/50.336	159.81	71.689	-1.1456	33.693	528.16	3.8345	6.2898e-05	0.99994	0.0001258	0.011709	FALSE
BRUGEN01780	BMP4	505.62/500.47/451.76	340.43/313.88/342.86	500.47	340.43	-0.55459	1199.4	1743	3.8334	6.3188e-05	0.99994	0.00012638	0.011749	FALSE
BRUGEN54488	FIZ1	637.57/523.6/530.29	728.61/527.98/695.21	530.29	695.21	0.39004	5776.9	1851.8	3.8326	0.99994	6.3407e-05	0.00012681	0.011775	TRUE
BRUGEN35454	TRMT2A	437.13/401.64/373.24	577.2/418.51/544.2	401.64	544.2	0.43732	1033.1	1384.6	3.8314	0.99994	6.3711e-05	0.00012742	0.011804	TRUE
BRUGEN40285	GNB1L	229.65/134.58/78.523	241.85/215.07/99.723	134.58	215.07	0.67234	6089.9	441.31	3.8314	0.99994	6.3714e-05	0.00012743	0.011804	TRUE
BRUGEN56920	PTH2	195.4/168.22/162.15	162.59/258.66/291.57	168.22	258.66	0.61769	387.72	557.25	3.8311	0.99994	6.3793e-05	0.00012759	0.011805	TRUE
BRUGEN23801	XKRY	185.33/171.38/175.4	272.34/211.19/267.83	175.4	267.83	0.60781	57.348	582.14	3.8307	0.99994	6.3887e-05	0.00012777	0.011808	TRUE
BRUGEN13007	ODF2	384.76/390.07/317.15	472.53/524.1/535.66	384.76	524.1	0.44492	2299.3	1323.8	3.83	0.99994	6.4084e-05	0.00012817	0.01183	TRUE
BRUGEN19920	UCP2	519.72/459.46/414.03	712.35/612.26/607.84	459.46	612.26	0.41342	2847.6	1593.9	3.8273	0.99994	6.4769e-05	0.00012954	0.011942	TRUE
BRUGEN08113	H2AFX	209.5/188.2/198.86	331.28/297.41/251.68	198.86	297.41	0.57834	113.42	663.77	3.8254	0.99993	6.5293e-05	0.00013059	0.012023	TRUE
BRUGEN65511	PATL1	392.81/376.4/394.66	533.5/515.39/574.6	392.81	533.5	0.44068	136.36	1352.8	3.8251	0.99993	6.5361e-05	0.00013072	0.012023	TRUE
BRUGEN53513	DYDC2	323.32/358.53/326.33	457.29/370.07/453.98	326.33	453.98	0.47505	522.91	1114.3	3.824	0.99993	6.5654e-05	0.00013131	0.012062	TRUE
BRUGEN63856	GPR156	463.32/546.73/397.72	404.45/310.01/261.18	463.32	310.01	-0.57817	5630.6	1607.9	3.8234	6.5804e-05	0.99993	0.00013161	0.012076	FALSE
BRUGEN46702	IL22RA1	178.28/148.25/189.68	77.231/85.252/90.226	178.28	85.252	-1.0556	515.88	592.11	3.8229	6.5934e-05	0.99993	0.00013187	0.012085	FALSE
BRUGEN34699	MTG2	235.69/196.61/141.75	321.12/294.51/221.29	196.61	294.51	0.58051	2268.4	655.93	3.8223	0.99993	6.6105e-05	0.00013221	0.012102	TRUE
BRUGEN72141	PCNXL3	435.12/360.63/461.96	583.3/598.7/517.61	435.12	583.3	0.42199	3134.4	1505.6	3.8189	0.99993	6.7036e-05	0.00013407	0.012244	TRUE
BRUGEN71672	OR9G1	371.66/343.81/417.09	523.34/427.23/508.11	371.66	508.11	0.45012	1419.8	1276.7	3.8189	0.99993	6.7036e-05	0.00013407	0.012244	TRUE
BRUGEN05544	MARK2	260.87/206.08/221.29	325.18/244.13/329.56	221.29	325.18	0.55322	898.92	742.27	3.8132	0.99993	6.858e-05	0.00013716	0.012503	TRUE
BRUGEN16081	RFXAP	313.24/307.01/415.05	369.9/474.7/437.83	313.24	437.83	0.48178	5201.8	1067.6	3.8131	0.99993	6.8616e-05	0.00013723	0.012503	TRUE
BRUGEN15971	PRPH2	154.1/133.53/135.63	243.89/216.04/172.85	135.63	216.04	0.66765	172.83	444.92	3.8119	0.99993	6.8949e-05	0.0001379	0.012549	TRUE
BRUGEN09573	IMPDH2	311.23/293.34/306.95	473.55/430.13/401.74	306.95	430.13	0.48542	101.79	1045.2	3.8102	0.99993	6.9429e-05	0.00013886	0.012606	TRUE
BRUGEN55257	KLC4	275.98/230.26/217.21	261.16/336.16/350.46	230.26	336.16	0.54395	1130.2	773.74	3.8073	0.99993	7.0232e-05	0.00014046	0.012737	TRUE
BRUGEN39821	KCNK10	290.08/411.1/319.19	406.48/444.67/616.38	319.19	444.67	0.47703	4647.3	1088.8	3.8026	0.99993	7.159e-05	0.00014318	0.012968	TRUE
BRUGEN40837	QRICH1	139/90.421/104.02	156.49/182.13/173.8	104.02	173.8	0.7351	704.17	337.15	3.8006	0.99993	7.2169e-05	0.00014434	0.013041	TRUE
BRUGEN14221	PLTP	433.1/379.56/402.81	602.6/544.45/505.26	402.81	544.45	0.43375	729.15	1388.9	3.8005	0.99993	7.22e-05	0.0001444	0.013041	TRUE
BRUGEN35566	CLUL1	335.4/251.29/265.14	387.17/347.79/378.95	265.14	378.95	0.5136	2564.2	896.75	3.8004	0.99993	7.2241e-05	0.00014448	0.013041	TRUE
BRUGEN75041	C16orf52	221.59/242.87/188.66	325.18/159.85/583.14	221.59	325.18	0.55131	768.68	743.3	3.7998	0.99993	7.2412e-05	0.00014482	0.013045	TRUE
BRUGEN58875	ZFP3	854.12/806.43/878.03	1064/964.9/1323.9	854.12	1064	0.3166	1423.2	3049.8	3.7997	0.99993	7.2436e-05	0.00014487	0.013045	TRUE
BRUGEN21499	TKTL1	840.02/684.46/910.67	632.07/627.76/804.43	840.02	632.07	-0.40976	14594	2997.1	3.7983	7.2835e-05	0.99993	0.00014567	0.013102	FALSE
BRUGEN18676	TAF13	511.67/377.45/505.81	346.52/366.2/277.33	505.81	346.52	-0.54434	8255	1762.5	3.7942	7.4052e-05	0.99993	0.0001481	0.013305	FALSE
BRUGEN31595	NCOA6	607.35/640.3/559.86	872.91/764.36/782.59	607.35	782.59	0.36519	1670.7	2134.4	3.7931	0.99993	7.4389e-05	0.00014878	0.013351	TRUE
BRUGEN49329	CHPF	197.41/241.82/193.76	294.7/296.44/254.53	197.41	294.7	0.5756	992.75	658.73	3.7904	0.99992	7.521e-05	0.00015042	0.013482	TRUE
BRUGEN05540	EMD	500.59/416.36/430.35	607.69/526.04/576.49	430.35	576.49	0.42096	2564.6	1488.3	3.7882	0.99992	7.5857e-05	0.00015171	0.013583	TRUE
BRUGEN32166	EXOC6B	200.44/198.72/224.35	307.91/298.38/268.78	200.44	298.38	0.57166	287.47	669.27	3.786	0.99992	7.6541e-05	0.00015308	0.013689	TRUE
BRUGEN63611	ZNF791	1064.6/807.48/791.35	1103.6/1010.4/1008.6	807.48	1010.4	0.32311	33193	2875.7	3.7846	0.99992	7.6987e-05	0.00015397	0.013743	TRUE
BRUGEN44655	ENY2	307.2/304.91/227.41	426.8/429.17/373.25	304.91	426.8	0.48385	3005.4	1037.9	3.7837	0.99992	7.7262e-05	0.00015452	0.013743	TRUE
BRUGEN19630	TSC1	85.613/106.19/84.642	148.36/147.25/175.7	85.613	148.36	0.78618	212.21	275.08	3.7835	0.99992	7.7314e-05	0.00015463	0.013743	TRUE
BRUGEN48211	RFX7	110.79/142.99/134.61	198.16/214.1/222.24	134.61	214.1	0.66552	318.75	441.42	3.7833	0.99992	7.7383e-05	0.00015477	0.013743	TRUE
BRUGEN57008	TMEM54	280.01/273.36/234.55	293.68/388.48/441.63	273.36	388.48	0.50544	775.36	925.85	3.7831	0.99992	7.7436e-05	0.00015487	0.013743	TRUE
BRUGEN27182	PLXNC1	858.15/941.01/848.46	886.12/1067.6/1082.7	858.15	1067.6	0.31472	3479.8	3064.9	3.7831	0.99992	7.7441e-05	0.00015488	0.013743	TRUE
BRUGEN62507	GDF7	383.75/457.36/373.24	531.47/521.2/487.22	383.75	521.2	0.44068	2764.6	1320.2	3.7829	0.99992	7.7493e-05	0.00015499	0.013743	TRUE
BRUGEN37765	SEPSECS	311.23/270.21/320.21	179.87/195.69/188.05	311.23	188.05	-0.72384	881.61	1060.4	3.7827	7.7555e-05	0.99992	0.00015511	0.013743	FALSE
BRUGEN54510	FIBCD1	414.97/398.48/313.07	235.76/279.01/258.33	398.48	258.33	-0.62334	3783.3	1373.2	3.782	7.7777e-05	0.99992	0.00015555	0.013767	FALSE
BRUGEN53920	C22orf23	265.9/223.95/241.69	349.57/382.66/281.12	241.69	349.57	0.5306	450.56	813.95	3.7814	0.99992	7.7974e-05	0.00015595	0.013786	TRUE
BRUGEN51294	THUMPD2	405.91/416.36/365.08	284.53/264.47/237.44	405.91	264.47	-0.61613	887.95	1400	3.7799	7.8434e-05	0.99992	0.00015687	0.013852	FALSE
BRUGEN26418	ARNT2	335.4/253.39/288.6	314/406.88/446.38	288.6	406.88	0.4941	1715.2	979.88	3.7787	0.99992	7.8819e-05	0.00015764	0.013904	TRUE
BRUGEN00625	ALDH3B2	505.62/436.33/396.7	621.91/493.1/583.14	436.33	583.14	0.41759	3186.1	1510	3.7781	0.99992	7.9029e-05	0.00015806	0.013925	TRUE
BRUGEN68444	FOXD4L3	169.21/199.77/168.26	241.85/258.66/274.48	169.21	258.66	0.6093	467.24	560.67	3.7777	0.99992	7.9154e-05	0.00015831	0.013931	TRUE
BRUGEN65798	OARD1	71.512/66.238/70.365	121.94/126.91/143.41	70.365	126.91	0.84183	9.1723	224.11	3.7771	0.99992	7.9333e-05	0.00015867	0.013943	TRUE
BRUGEN49564	DHX40	440.15/499.42/571.08	341.44/427.23/341.91	499.42	341.91	-0.54531	4323.8	1739.2	3.7769	7.9403e-05	0.99992	0.00015881	0.013943	FALSE
BRUGEN69564	TGM6	645.62/652.92/678.16	841.41/834.11/630.63	652.92	834.11	0.35285	344.99	2302.3	3.7762	0.99992	7.9623e-05	0.00015925	0.013966	TRUE
BRUGEN32820	ATP1B4	492.53/539.37/538.45	702.19/667.48/718.96	538.45	702.19	0.38244	1054.6	1881.7	3.7749	0.99992	8.0046e-05	0.00016009	0.014023	TRUE
BRUGEN45813	TAOK1	356.55/303.86/342.65	213.4/290.63/207.04	342.65	213.4	-0.68061	849.08	1172.6	3.7743	8.0225e-05	0.99992	0.00016045	0.014023	FALSE
BRUGEN34004	TRIM58	164.18/176.64/153.99	76.215/58.126/101.62	164.18	76.215	-1.0971	129.53	543.24	3.7739	8.0342e-05	0.99992	0.00016068	0.014023	FALSE
BRUGEN34475	ANKRD17	369.65/340.65/314.09	469.48/388.48/502.41	340.65	469.48	0.4616	773.07	1165.5	3.7736	0.99992	8.0456e-05	0.00016091	0.014023	TRUE
BRUGEN24633	KIF3B	115.83/119.86/117.27	191.04/162.75/224.14	117.27	191.04	0.6993	4.3856	382.18	3.7735	0.99992	8.0487e-05	0.00016097	0.014023	TRUE
BRUGEN10506	RPSA	169.21/127.22/125.43	226.61/184.07/204.2	127.22	204.2	0.67838	883.27	416.12	3.7735	0.99992	8.0491e-05	0.00016098	0.014023	TRUE
BRUGEN26850	UBA2	64.462/94.626/5.0989	15.243/10.656/4.7487	64.462	10.656	-2.4895	2216.9	204.5	3.7724	8.0843e-05	0.99992	0.00016169	0.014063	FALSE
BRUGEN53847	ZGPAT	513.68/460.51/459.92	570.09/611.29/643.93	460.51	611.29	0.40785	1413.4	1597.7	3.7722	0.99992	8.0901e-05	0.0001618	0.014063	TRUE
BRUGEN56136	MTG1	464.33/356.43/346.73	502/488.26/383.7	356.43	488.26	0.45296	5868.3	1222	3.7713	0.99992	8.119e-05	0.00016238	0.014097	TRUE
BRUGEN65206	ATAD3C	139/82.009/85.662	280.47/148.22/113.97	85.662	148.22	0.78399	1428.9	275.24	3.7709	0.99992	8.1337e-05	0.00016267	0.014107	TRUE
BRUGEN53698	NKX6-2	201.44/158.76/171.32	281.49/193.75/261.18	171.32	261.18	0.60544	532.49	567.99	3.7703	0.99992	8.1519e-05	0.00016304	0.014112	TRUE
BRUGEN01128	ARHGAP4	261.88/375.35/289.62	470.5/407.85/379.9	289.62	407.85	0.49246	4059.9	983.5	3.7701	0.99992	8.1583e-05	0.00016317	0.014112	TRUE
BRUGEN69503	PRAMEF10	344.47/285.98/269.22	403.43/426.26/390.35	285.98	403.43	0.49493	1850.7	970.59	3.7699	0.99992	8.1662e-05	0.00016332	0.014112	TRUE
BRUGEN70497	MAST4	375.69/379.56/358.96	511.15/464.04/632.53	375.69	511.15	0.44317	147.38	1291.2	3.7697	0.99992	8.1732e-05	0.00016346	0.014112	TRUE
BRUGEN26306	OSBPL2	430.08/466.82/407.91	576.18/575.45/517.61	430.08	575.45	0.41924	920.71	1487.4	3.7693	0.99992	8.1852e-05	0.0001637	0.014117	TRUE
BRUGEN09656	INSM1	572.1/603.51/662.86	584.31/776.95/800.63	603.51	776.95	0.36393	2254.6	2120.2	3.7668	0.99992	8.2664e-05	0.00016533	0.014242	TRUE
BRUGEN54100	HDGFRP2	86.62/69.393/42.831	132.11/77.502/125.37	69.393	125.37	0.84411	501.16	220.87	3.7663	0.99992	8.2851e-05	0.0001657	0.014258	TRUE
BRUGEN43949	PCDHB15	509.65/452.1/384.46	636.14/455.32/601.19	452.1	601.19	0.41037	3943.8	1567.2	3.766	0.99992	8.2952e-05	0.0001659	0.01426	TRUE
BRUGEN52012	RAB1B	985.06/1064/841.32	1006/1209/1300.2	985.06	1209	0.2953	13448	3541	3.7638	0.99992	8.3677e-05	0.00016735	0.014365	TRUE
BRUGEN06082	FBLN1	270.94/258.65/253.93	369.9/262.54/379.9	258.65	369.9	0.51447	86.727	873.77	3.7636	0.99992	8.3751e-05	0.0001675	0.014365	TRUE
BRUGEN41127	TXNL4B	244.75/177.69/190.7	285.55/289.66/210.84	190.7	285.55	0.57995	1545.6	635.32	3.7631	0.99992	8.3899e-05	0.0001678	0.014374	TRUE
BRUGEN36216	COA3	469.36/418.46/328.37	267.26/317.76/275.43	418.46	275.43	-0.60164	5353.6	1445.3	3.7623	8.419e-05	0.99992	0.00016838	0.014402	FALSE
BRUGEN21028	SLMAP	432.1/425.82/330.41	281.49/388.48/273.53	425.82	281.49	-0.59544	4571.1	1472	3.762	8.4287e-05	0.99992	0.00016857	0.014402	FALSE
BRUGEN19238	ICAM5	268.93/213.43/202.94	314/356.51/282.07	213.43	314	0.55483	1594.8	714.73	3.7618	0.99992	8.4346e-05	0.00016869	0.014402	TRUE
BRUGEN18969	TMBIM6	79.57/72.547/85.662	160.56/89.127/139.61	79.57	139.61	0.80341	43.217	254.82	3.7613	0.99992	8.4511e-05	0.00016902	0.014402	TRUE
BRUGEN74822	SLC15A5	68.491/47.313/44.87	102.64/58.126/93.075	47.313	93.075	0.96139	227.23	148.05	3.761	0.99992	8.4638e-05	0.00016928	0.014402	TRUE
BRUGEN36500	NXT1	68.491/85.164/60.167	110.77/124/148.16	68.491	124	0.84707	173.64	217.87	3.7608	0.99992	8.4676e-05	0.00016935	0.014402	TRUE
BRUGEN07090	GGT1	105.76/130.37/108.1	133.12/211.19/178.55	108.1	178.55	0.71879	250.87	350.98	3.7607	0.99992	8.471e-05	0.00016942	0.014402	TRUE
BRUGEN12283	NDUFA5	30.216/13.668/12.237	37.599/43.595/21.844	13.668	37.599	1.3959	137.95	40.509	3.76	0.99991	8.6338e-05	0.00017268	0.014564	TRUE
BRUGEN31393	PCNX	677.86/675/733.22	493.87/741.11/480.57	677.86	493.87	-0.45605	1536.9	2394.4	3.76	8.4968e-05	0.99992	0.00016994	0.014429	FALSE
BRUGEN01176	ARNTL	639.58/639.25/722.01	818.04/748.86/865.22	639.58	818.04	0.35455	3396.9	2253.1	3.7596	0.99991	8.5086e-05	0.00017017	0.014429	TRUE
BRUGEN60395	OR2A14	490.51/530.96/455.84	462.37/665.55/645.83	490.51	645.83	0.39615	1418.9	1706.7	3.7594	0.99991	8.5149e-05	0.0001703	0.014429	TRUE
BRUGEN08568	SLC29A2	305.19/187.15/172.34	286.57/280.94/276.38	187.15	280.94	0.58352	7075.9	622.96	3.7579	0.99991	8.568e-05	0.00017136	0.014503	TRUE
BRUGEN38105	RAPGEFL1	222.59/228.15/210.08	119.91/151.13/91.175	222.59	119.91	-0.88694	93.825	746.83	3.7574	8.5841e-05	0.99991	0.00017168	0.014514	FALSE
BRUGEN32912	SEC11A	656.7/609.81/629.21	520.29/452.42/451.13	629.21	452.42	-0.47499	566.1	2214.8	3.7565	8.6143e-05	0.99991	0.00017229	0.01455	FALSE
BRUGEN39557	TM6SF1	223.6/273.36/142.77	331.28/326.48/228.89	223.6	326.48	0.54402	4505.1	750.37	3.7555	0.99991	8.6496e-05	0.00017299	0.014564	TRUE
BRUGEN32963	ZFYVE26	373.68/379.56/413.01	243.89/304.19/243.13	379.56	243.89	-0.636	576.91	1305.1	3.7555	8.6507e-05	0.99991	0.00017301	0.014564	FALSE
BRUGEN48677	C19orf43	441.16/451.05/406.89	598.54/543.48/587.89	441.16	587.89	0.41343	636.04	1527.5	3.7544	0.99991	8.6895e-05	0.00017379	0.014591	TRUE
BRUGEN41017	UBE2R2	367.63/335.4/321.23	537.57/415.6/462.53	335.4	462.53	0.46248	619.91	1146.7	3.7542	0.99991	8.6942e-05	0.00017388	0.014591	TRUE
BRUGEN37723	NDUFA13	149.07/107.24/97.899	183.93/177.28/99.723	107.24	177.28	0.71991	918.31	348.08	3.7542	0.99991	8.6951e-05	0.0001739	0.014591	TRUE
BRUGEN23290	ZPR1	195.4/235.51/213.13	307.91/376.85/313.42	213.13	313.42	0.55416	407.69	713.68	3.7538	0.99991	8.7093e-05	0.00017419	0.014599	TRUE
BRUGEN73848	PGA3	200.44/188.2/191.72	286.57/196.66/304.87	191.72	286.57	0.5774	44.178	638.87	3.7525	0.99991	8.7535e-05	0.00017507	0.014657	TRUE
BRUGEN19629	TSC1	228.64/262.85/232.51	337.38/309.04/358.05	232.51	337.38	0.53515	467.77	781.66	3.7508	0.99991	8.812e-05	0.00017624	0.014739	TRUE
BRUGEN22626	EIF3I	19.137/3.1542/5.0989	31.502/19.375/8.5477	5.0989	19.375	1.7402	100.43	14.489	3.7506	0.9999	9.6944e-05	0.00019389	0.015768	TRUE
BRUGEN34446	FAM169A	235.69/196.61/182.54	292.66/210.22/299.17	196.61	292.66	0.57149	862.46	655.93	3.7504	0.99991	8.8279e-05	0.00017656	0.014741	TRUE
BRUGEN04506	DAO	485.48/414.25/409.95	510.13/556.07/591.69	414.25	556.07	0.42388	2545.7	1430.2	3.7502	0.99991	8.836e-05	0.00017672	0.014741	TRUE
BRUGEN22045	GPR65	438.14/399.53/500.71	477.61/584.17/594.54	438.14	584.17	0.41418	2703	1516.5	3.7499	0.99991	8.8468e-05	0.00017694	0.014741	TRUE
BRUGEN13087	OR3A1	428.07/320.68/406.89	283.52/266.41/206.09	406.89	266.41	-0.60913	3940.7	1403.6	3.7497	8.8512e-05	0.99991	0.00017702	0.014741	FALSE
BRUGEN40013	MIEF1	393.82/400.58/292.68	338.39/255.76/248.83	393.82	255.76	-0.6208	5137.9	1356.4	3.7487	8.886e-05	0.99991	0.00017772	0.014777	FALSE
BRUGEN12402	DRG1	671.81/632.95/587.39	809.91/825.39/755.05	632.95	809.91	0.35518	1792.8	2228.6	3.7486	0.99991	8.8923e-05	0.00017785	0.014777	TRUE
BRUGEN20697	ZNF143	257.85/203.97/189.68	301.81/352.63/264.98	203.97	301.81	0.56298	1553.4	681.63	3.7474	0.99991	8.9328e-05	0.00017866	0.014829	TRUE
BRUGEN69928	CTU2	195.4/144.04/96.879	225.6/231.54/126.32	144.04	225.6	0.64365	2431	473.8	3.7467	0.99991	8.9603e-05	0.00017921	0.014859	TRUE
BRUGEN45189	ZNFX1	731.24/650.82/614.93	830.23/765.33/873.77	650.82	830.23	0.35078	3877.7	2294.5	3.7455	0.99991	9.0023e-05	0.00018005	0.014912	TRUE
BRUGEN43567	PLGRKT	462.31/579.32/588.41	410.54/355.54/444.48	579.32	410.54	-0.49581	6887.2	2031.4	3.7448	9.0287e-05	0.99991	0.00018057	0.01494	FALSE
BRUGEN43525	UBAP2	71.512/95.678/65.266	128.04/137.57/118.72	71.512	128.04	0.83153	311.49	227.93	3.7443	0.99991	9.0451e-05	0.0001809	0.014951	TRUE
BRUGEN26757	GNE	392.81/444.74/422.19	252.02/369.1/279.22	422.19	279.22	-0.59472	685.81	1458.8	3.7431	9.0897e-05	0.99991	0.00018179	0.014999	FALSE
BRUGEN57996	TRIM6	534.83/401.64/402.81	592.44/494.07/542.3	402.81	542.3	0.42807	8715	1388.9	3.743	0.99991	9.0935e-05	0.00018187	0.014999	TRUE
BRUGEN45851	CEP126	219.57/273.36/164.18	321.12/249.94/324.81	219.57	321.12	0.54633	2980.7	736.24	3.7424	0.99991	9.1135e-05	0.00018227	0.015016	TRUE
BRUGEN61688	SLFN13	496.56/419.51/424.23	402.41/280.94/269.73	424.23	280.94	-0.59284	2626.8	1466.2	3.742	9.1274e-05	0.99991	0.00018255	0.015023	FALSE
BRUGEN07210	GLE1	47.339/50.467/77.503	97.555/66.845/101.62	50.467	97.555	0.93727	370.37	158.37	3.7417	0.99991	9.1409e-05	0.00018282	0.015029	TRUE
BRUGEN61961	ZNF558	594.26/601.4/624.11	773.33/743.05/804.43	601.4	773.33	0.36221	283.26	2112.5	3.7405	0.99991	9.1819e-05	0.00018364	0.015054	TRUE
BRUGEN56934	AHNAK2	84.606/94.626/70.365	176.82/62.97/146.26	84.606	146.26	0.78259	151.61	271.7	3.7404	0.99991	9.1847e-05	0.00018369	0.015054	TRUE
BRUGEN31296	SNW1	162.16/96.729/122.37	197.14/200.54/149.11	122.37	197.14	0.6835	1120.4	399.57	3.7404	0.99991	9.1849e-05	0.0001837	0.015054	TRUE
BRUGEN53305	NOA1	111.8/101.99/127.47	176.82/183.1/215.59	111.8	183.1	0.70669	170.97	363.56	3.7392	0.99991	9.2288e-05	0.00018458	0.01511	TRUE
BRUGEN60449	MPLKIP	551.95/530.96/445.64	557.89/370.07/333.36	530.96	370.07	-0.51962	3859.6	1854.3	3.7363	9.3389e-05	0.99991	0.00018678	0.015274	FALSE
BRUGEN47534	TFB2M	84.606/43.108/41.811	86.377/71.689/87.377	43.108	86.377	0.98622	861.9	134.34	3.7332	0.99991	9.4538e-05	0.00018908	0.015445	TRUE
BRUGEN39549	CHIC1	204.46/215.54/203.96	245.92/331.32/302.02	204.46	302.02	0.56052	61.436	683.35	3.7319	0.9999	9.5038e-05	0.00019008	0.015511	TRUE
BRUGEN49372	PGBD5	282.02/231.31/296.76	166.66/185.04/137.71	282.02	166.66	-0.7554	1394.4	956.53	3.7301	9.5699e-05	0.9999	0.0001914	0.015602	FALSE
BRUGEN38959	ZC3HC1	434.11/428.97/370.18	711.34/572.54/566.05	428.97	572.54	0.41566	1741.4	1483.4	3.7277	0.9999	9.6616e-05	0.00019323	0.015735	TRUE
BRUGEN41194	C20orf27	266.91/228.15/224.35	357.7/331.32/306.77	228.15	331.32	0.53625	758.3	766.35	3.7266	0.9999	9.7024e-05	0.00019405	0.015768	TRUE
BRUGEN47566	ATL2	32.231/26.285/36.712	81.296/56.189/69.331	32.231	69.331	1.0816	27.717	99.161	3.7257	0.9999	9.7444e-05	0.00019489	0.015802	TRUE
BRUGEN10207	KIT	312.24/411.1/391.6	260.15/254.79/241.24	391.6	254.79	-0.61811	3339.2	1348.4	3.7257	9.7399e-05	0.9999	0.0001948	0.015802	FALSE
BRUGEN50228	THSD4	423.03/616.12/467.06	317.05/657.8/258.33	467.06	317.05	-0.55743	12079	1621.4	3.7253	9.7544e-05	0.9999	0.00019509	0.015802	FALSE
BRUGEN61117	ASB12	237.7/338.55/389.56	175.8/235.41/211.79	338.55	211.79	-0.67418	6386	1158	3.725	9.764e-05	0.9999	0.00019528	0.015802	FALSE
BRUGEN64736	PIKFYVE	244.75/216.59/198.86	94.506/116.25/131.06	216.59	116.25	-0.89199	553.81	725.78	3.7244	9.7883e-05	0.9999	0.00019577	0.015806	FALSE
BRUGEN44945	CASS4	132.95/74.65/78.523	111.78/137.57/142.46	78.523	137.57	0.80112	1488.8	251.32	3.7243	0.9999	9.7918e-05	0.00019584	0.015806	TRUE
BRUGEN19452	TP53	611.38/681.31/680.19	862.75/795.36/1018.1	680.19	862.75	0.34255	2368.4	2403	3.724	0.9999	9.8028e-05	0.00019606	0.015806	TRUE
BRUGEN36916	FTSJ2	164.18/130.37/88.721	262.18/207.32/165.26	130.37	207.32	0.6651	1438.8	426.91	3.7239	0.9999	9.8074e-05	0.00019615	0.015806	TRUE
BRUGEN30553	PDCD10	171.23/216.59/177.44	279.45/187.94/267.83	177.44	267.83	0.59123	785.56	589.22	3.7236	0.9999	9.82e-05	0.0001964	0.015806	TRUE
BRUGEN67200	OR51V1	144.03/144.04/177.44	227.63/204.41/225.09	144.04	225.09	0.64042	557.77	473.8	3.7234	0.9999	9.8274e-05	0.00019655	0.015806	TRUE
BRUGEN36424	BABAM1	168.2/153.5/180.5	256.08/218.94/271.63	168.2	256.08	0.60345	183.65	557.19	3.7228	0.9999	9.8503e-05	0.00019701	0.015826	TRUE
BRUGEN40237	DDX49	63.455/83.061/63.226	117.88/116.25/103.52	63.455	116.25	0.86326	192.23	201.17	3.7225	0.9999	9.8621e-05	0.00019724	0.015829	TRUE
BRUGEN28235	HOXB13	774.55/884.23/878.03	653.41/881.58/669.57	878.03	669.57	-0.39053	5373.7	3139.3	3.7206	9.9371e-05	0.9999	0.00019874	0.015932	FALSE
BRUGEN16592	RPS21	163.17/194.51/173.36	304.86/262.54/251.68	173.36	262.54	0.59591	275.55	575.06	3.7186	0.9999	0.00010016	0.00020032	0.016031	TRUE
BRUGEN06898	GAS6	742.32/579.32/569.04	661.54/746.92/772.14	579.32	746.92	0.36603	13336	2031.4	3.7185	0.9999	0.00010019	0.00020039	0.016031	TRUE
BRUGEN55676	TRIM41	249.79/250.23/225.37	357.7/371.04/340.01	249.79	357.7	0.51631	298.21	842.51	3.7178	0.9999	0.0001005	0.000201	0.016064	TRUE
BRUGEN07525	PRLHR	567.06/414.25/579.24	401.4/403.98/385.6	567.06	401.4	-0.49743	11749	1986.4	3.717	0.0001008	0.9999	0.0002016	0.016089	FALSE
BRUGEN50244	ZC3H14	206.48/158.76/127.47	243.89/225.72/271.63	158.76	243.89	0.61619	1628	524.53	3.7168	0.9999	0.00010087	0.00020173	0.016089	TRUE
BRUGEN39078	PCF11	102.74/169.28/97.899	144.3/170.5/203.25	102.74	170.5	0.72532	2225.5	332.81	3.7147	0.9999	0.00010172	0.00020344	0.016208	TRUE
BRUGEN09167	IDUA	584.18/582.48/497.65	414.61/428.2/393.19	582.48	414.61	-0.48945	3599	2043	3.714	0.00010201	0.9999	0.00020403	0.016218	FALSE
BRUGEN50841	DBF4B	347.49/338.55/386.5	211.37/273.19/219.39	347.49	219.39	-0.66105	800.76	1190	3.7134	0.00010223	0.9999	0.00020446	0.016218	FALSE
BRUGEN49572	PARP8	214.54/161.92/164.18	210.35/256.72/250.73	164.18	250.73	0.60781	1270.2	543.27	3.7132	0.9999	0.00010233	0.00020467	0.016218	TRUE
BRUGEN02100	CA3	182.31/225/234.55	122.96/137.57/107.32	225	122.96	-0.86645	957.01	755.28	3.713	0.00010242	0.9999	0.00020485	0.016218	FALSE
BRUGEN51434	GRIP2	288.06/264.95/240.67	415.62/311.94/376.1	264.95	376.1	0.50377	561.91	896.07	3.7129	0.9999	0.00010243	0.00020486	0.016218	TRUE
BRUGEN12290	NDUFA7	330.37/305.96/292.68	425.79/377.82/432.13	305.96	425.79	0.47547	386.07	1041.6	3.7128	0.9999	0.00010248	0.00020497	0.016218	TRUE
BRUGEN30455	ANXA10	487.49/482.59/473.18	285.55/497.95/330.51	482.59	330.51	-0.54474	56.319	1677.9	3.7127	0.00010251	0.9999	0.00020502	0.016218	FALSE
BRUGEN21047	KCNAB1	507.64/532.01/510.91	345.51/459.2/354.25	510.91	354.25	-0.52704	227.95	1781.1	3.712	0.00010282	0.9999	0.00020564	0.01625	FALSE
BRUGEN32788	SLC7A8	49.354/47.313/84.642	95.522/64.908/110.17	49.354	95.522	0.93877	624.72	154.72	3.7117	0.9999	0.00010295	0.0002059	0.016254	TRUE
BRUGEN66225	PELI3	157.13/130.37/110.14	234.74/159.85/207.04	130.37	207.04	0.66321	562.6	426.91	3.7107	0.9999	0.00010333	0.00020666	0.016297	TRUE
BRUGEN23939	RQCD1	839.01/857.95/798.49	636.14/710.11/606.89	839.01	636.14	-0.3988	1000.2	2993.4	3.708	0.00010444	0.9999	0.00020889	0.016456	FALSE
BRUGEN21455	USP11	308.21/319.63/355.9	442.05/423.35/443.53	319.63	442.05	0.46656	723.22	1090.3	3.7074	0.9999	0.00010471	0.00020942	0.016481	TRUE
BRUGEN71791	OR11G2	773.54/755.96/785.23	970.47/925.18/967.79	773.54	967.79	0.32284	222.9	2749.3	3.7046	0.99989	0.00010584	0.00021169	0.016643	TRUE
BRUGEN73887	CBWD6	203.46/162.97/110.14	268.28/248.97/223.19	162.97	248.97	0.60837	2215.3	539.06	3.7043	0.99989	0.00010597	0.00021193	0.016645	TRUE
BRUGEN09448	IL7R	59.426/31.542/32.633	48.777/69.751/71.231	32.633	69.751	1.0729	359.52	100.45	3.7035	0.99989	0.0001064	0.0002128	0.016696	TRUE
BRUGEN67985	SIRPB2	628.5/451.05/526.21	684.92/653.92/699.96	526.21	684.92	0.37966	8056.3	1836.9	3.703	0.99989	0.00010653	0.00021306	0.0167	TRUE
BRUGEN15335	PTGER3	301.16/364.84/362.02	219.5/231.54/298.22	362.02	231.54	-0.6426	1856.3	1242.1	3.7025	0.00010675	0.99989	0.00021351	0.016718	FALSE
BRUGEN60467	CLDN23	676.85/795.91/548.64	495.9/555.11/488.17	676.85	495.9	-0.448	15306	2390.7	3.7007	0.00010749	0.99989	0.00021498	0.016783	FALSE
BRUGEN21895	LTBP4	113.82/135.63/111.16	198.16/185.04/135.81	113.82	185.04	0.69626	241.5	370.41	3.7005	0.99989	0.00010758	0.00021516	0.016783	TRUE
BRUGEN48713	DDA1	113.82/119.86/90.761	162.59/185.04/234.59	113.82	185.04	0.69626	284.03	370.41	3.7005	0.99989	0.00010758	0.00021516	0.016783	TRUE
BRUGEN06712	XRCC6	429.07/391.12/397.72	621.91/468.88/534.71	397.72	534.71	0.42608	513.41	1370.5	3.7005	0.99989	0.0001076	0.0002152	0.016783	TRUE
BRUGEN08043	GYPC	1141.2/1085/1010.6	831.25/853.49/919.35	1085	853.49	-0.34596	4346.1	3918.2	3.6993	0.00010808	0.99989	0.00021617	0.016841	FALSE
BRUGEN72706	FAM19A1	283.03/248.13/261.06	370.91/306.13/381.8	261.06	370.91	0.50504	324.82	882.32	3.6981	0.99989	0.00010862	0.00021724	0.016903	TRUE
BRUGEN45564	ZNF490	468.36/493.11/501.73	646.3/558.98/670.52	493.11	646.3	0.38961	343.56	1716.2	3.6979	0.99989	0.0001087	0.0002174	0.016903	TRUE
BRUGEN30037	TRIM31	17.123/8.4112/10.198	19.308/31.001/30.392	10.198	30.392	1.4872	25.573	29.845	3.6964	0.99989	0.00011281	0.00022562	0.017415	TRUE
BRUGEN72014	GDF6	250.8/257.59/365.08	203.24/391.38/366.6	257.59	366.6	0.50745	5799.9	870.06	3.6956	0.99989	0.00010969	0.00021939	0.017041	TRUE
BRUGEN70350	HSD11B1L	162.16/152.45/160.11	249.98/245.1/204.2	160.11	245.1	0.61123	31.392	529.17	3.6948	0.99989	0.00011005	0.00022009	0.017077	TRUE
BRUGEN08647	HOXA5	119.86/126.17/146.85	201.21/231.54/162.41	126.17	201.21	0.66909	233.74	412.52	3.6945	0.99989	0.00011015	0.0002203	0.017077	TRUE
BRUGEN09557	ILK	230.65/250.23/267.18	351.6/357.48/365.65	250.23	357.48	0.51285	335.36	844.08	3.6913	0.99989	0.00011157	0.00022315	0.017281	TRUE
BRUGEN61999	ZNF569	218.57/370.09/318.17	257.1/196.66/176.65	318.17	196.66	-0.69131	6308.7	1085.1	3.6887	0.0001127	0.99989	0.0002254	0.017415	FALSE
BRUGEN48469	SPATS2	79.57/93.575/105.04	169.7/107.53/157.66	93.575	157.66	0.74639	163.77	301.86	3.6884	0.99989	0.00011284	0.00022568	0.017415	TRUE
BRUGEN68611	KRTAP8-1	137.99/95.678/88.721	169.7/98.815/160.51	95.678	160.51	0.74034	919.3	308.95	3.6883	0.99989	0.00011289	0.00022578	0.017415	TRUE
BRUGEN66202	GAS2L2	268.93/342.76/357.94	216.45/250.91/166.21	342.76	216.45	-0.66071	2840.8	1173	3.6879	0.00011306	0.99989	0.00022612	0.017423	FALSE
BRUGEN35453	SIGLEC7	501.59/453.16/483.38	609.72/634.54/645.83	483.38	634.54	0.39186	622.59	1680.8	3.6873	0.99989	0.00011333	0.00022667	0.017449	TRUE
BRUGEN11566	MLLT6	285.04/266.01/173.36	155.48/185.04/146.26	266.01	155.48	-0.77091	4472.5	899.79	3.6847	0.0001145	0.99989	0.00022901	0.017611	FALSE
BRUGEN39693	PELO	300.15/263.9/217.21	373.96/285.79/376.1	263.9	373.96	0.50128	1746.9	892.36	3.6843	0.99989	0.00011468	0.00022936	0.017621	TRUE
BRUGEN21542	PICALM	234.68/195.56/208.04	320.1/305.16/269.73	208.04	305.16	0.55055	432.8	695.83	3.682	0.99988	0.00011569	0.00023138	0.017758	TRUE
BRUGEN15321	PTGDS	213.53/227.1/170.3	210.35/311.94/313.42	213.53	311.94	0.54473	1026.4	715.06	3.6803	0.99988	0.00011646	0.00023292	0.017859	TRUE
BRUGEN24798	CDYL	631.52/522.55/534.37	789.58/647.14/693.31	534.37	693.31	0.37506	4789.7	1866.7	3.6789	0.99988	0.00011714	0.00023429	0.017946	TRUE
BRUGEN11746	MYO1B	172.23/231.31/179.48	269.29/218.94/301.07	179.48	269.29	0.58267	1369.3	596.3	3.6779	0.99988	0.0001176	0.00023521	0.017999	TRUE
BRUGEN16431	RPL36AL	538.86/514.14/474.2	389.2/358.45/358.05	514.14	358.45	-0.51918	1103.1	1792.9	3.677	0.000118	0.99988	0.000236	0.018042	FALSE
BRUGEN28477	RPP38	41.296/23.131/24.475	61.988/56.189/38.94	24.475	56.189	1.1667	142.38	74.396	3.6769	0.99988	0.00011833	0.00023667	0.018075	TRUE
BRUGEN49172	OR51B2	359.58/462.62/397.72	558.91/533.79/455.88	397.72	533.79	0.42362	2833.5	1370.5	3.6758	0.99988	0.00011856	0.00023711	0.018091	TRUE
BRUGEN43363	MCTP2	519.72/445.8/544.56	535.54/363.29/319.11	519.72	363.29	-0.51543	3041.2	1813.2	3.6737	0.00011953	0.99988	0.00023907	0.018222	FALSE
BRUGEN75834	LRRC3C	426.05/582.48/408.93	424.77/762.42/567	426.05	567	0.41147	12381	1472.8	3.6727	0.99988	0.00012002	0.00024005	0.018279	TRUE
BRUGEN10609	LGALS7	247.77/173.48/167.24	204.26/261.57/278.28	173.48	261.57	0.58962	2779.2	575.47	3.6719	0.99988	0.00012035	0.00024071	0.018304	TRUE
BRUGEN71849	ARL5C	357.56/442.64/430.35	349.57/288.69/254.53	430.35	288.69	-0.57432	2724.5	1488.3	3.6718	0.00012042	0.99988	0.00024085	0.018304	FALSE
BRUGEN01072	ARF1	177.27/88.318/120.33	193.08/199.57/191.85	120.33	193.08	0.67764	2133.4	392.61	3.6712	0.99988	0.00012069	0.00024139	0.01831	TRUE
BRUGEN10899	LYL1	223.6/229.21/219.25	324.17/281.91/351.41	223.6	324.17	0.53381	25.159	750.37	3.6712	0.99988	0.0001207	0.00024141	0.01831	TRUE
BRUGEN35910	TINAG	407.92/443.69/414.03	552.81/458.23/612.59	414.03	552.81	0.41617	458.54	1429.4	3.6707	0.99988	0.00012092	0.00024184	0.018326	TRUE
BRUGEN12188	NAP1L1	388.79/337.5/505.81	340.43/245.1/254.53	388.79	254.53	-0.60918	8162.7	1338.3	3.6699	0.00012134	0.99988	0.00024268	0.018371	FALSE
BRUGEN12990	OCM2	172.23/112.5/114.22	184.95/153.07/228.89	114.22	184.95	0.69056	1684.5	371.77	3.6684	0.99988	0.00012202	0.00024404	0.018456	TRUE
BRUGEN56760	FNIP1	233.67/233.41/215.17	295.71/336.16/358.05	233.41	336.16	0.5244	166.34	784.83	3.6678	0.99988	0.00012234	0.00024468	0.018486	TRUE
BRUGEN48222	PAPOLG	594.26/599.3/552.72	426.8/430.13/426.44	594.26	426.8	-0.47657	875.29	2086.2	3.6662	0.0001231	0.99988	0.0002462	0.018583	FALSE
BRUGEN71726	BSX	593.25/643.46/559.86	874.94/760.48/583.14	593.25	760.48	0.35775	1817.9	2082.5	3.6646	0.99988	0.00012385	0.0002477	0.018673	TRUE
BRUGEN14733	PRF1	218.57/217.64/337.55	273.36/317.76/347.61	218.57	317.76	0.5378	7078.8	732.7	3.6644	0.99988	0.00012394	0.00024788	0.018673	TRUE
BRUGEN17596	SLC9A5	294.11/239.72/234.55	368.88/323.57/343.81	239.72	343.81	0.51843	1492.3	807.02	3.664	0.99988	0.00012415	0.00024831	0.018687	TRUE
BRUGEN13162	OXCT1	224.61/244.98/207.02	325.18/310.01/359.95	224.61	325.18	0.53186	362.19	753.9	3.6629	0.99988	0.00012468	0.00024936	0.018748	TRUE
BRUGEN34251	DHRS7B	682.89/570.91/560.88	734.71/646.17/790.19	570.91	734.71	0.36334	6320	2000.6	3.6621	0.99987	0.00012507	0.00025014	0.018789	TRUE
BRUGEN69797	MURC	513.68/503.62/571.08	668.66/620.98/681.92	513.68	668.66	0.37975	1697.9	1791.2	3.6618	0.99987	0.00012521	0.00025042	0.018792	TRUE
BRUGEN55344	WFDC8	338.42/349.07/361	483.71/475.67/393.19	349.07	475.67	0.44535	127.87	1195.6	3.6613	0.99987	0.00012545	0.0002509	0.018809	TRUE
BRUGEN15283	PSMD13	85.613/106.19/87.701	123.98/149.19/157.66	87.701	149.19	0.75977	173.13	282.09	3.661	0.99987	0.00012559	0.00025118	0.018812	TRUE
BRUGEN66757	EML3	491.52/359.58/413.01	611.75/551.23/533.76	413.01	551.23	0.4156	4509.3	1425.7	3.6606	0.99987	0.00012579	0.00025158	0.018824	TRUE
BRUGEN48367	GPBP1	171.23/231.31/288.6	333.31/293.54/360.9	231.31	333.31	0.52515	3446	777.44	3.6583	0.99987	0.00012693	0.00025387	0.018976	TRUE
BRUGEN76524	NonTargetingControl	1188.5/1022/1163.6	1040.6/926.14/891.81	1163.6	926.14	-0.32893	10337	4215.6	3.6568	0.0001277	0.99987	0.0002554	0.019072	FALSE
BRUGEN53775	KIAA1841	374.68/360.63/284.52	497.94/489.23/295.37	360.63	489.23	0.43894	2995.3	1237.1	3.6562	0.99987	0.00012798	0.00025595	0.019072	TRUE
BRUGEN30230	PWP1	454.25/375.35/367.12	530.45/506.67/427.39	375.35	506.67	0.4318	3146.7	1290	3.6562	0.99987	0.00012799	0.00025598	0.019072	TRUE
BRUGEN59616	DUSP15	629.51/583.53/563.94	748.94/685.89/790.19	583.53	748.94	0.35949	1249	2046.8	3.656	0.99987	0.00012807	0.00025613	0.019072	TRUE
BRUGEN07869	GSS	100.72/85.164/85.662	162.59/146.28/145.31	85.662	146.28	0.76514	113.52	275.24	3.6541	0.99987	0.00012905	0.0002581	0.0192	TRUE
BRUGEN28187	FST	94.678/75.701/115.24	158.53/80.408/163.36	94.678	158.53	0.73753	391.36	305.58	3.6525	0.99987	0.00012987	0.00025973	0.019294	TRUE
BRUGEN12128	MYO9B	597.28/608.76/537.43	807.88/744.98/764.54	597.28	764.54	0.35567	1857.2	2097.4	3.6523	0.99987	0.00012993	0.00025986	0.019294	TRUE
BRUGEN01615	BCAT2	520.73/476.29/501.73	663.58/558.98/654.37	501.73	654.37	0.38253	504.22	1747.6	3.6513	0.99987	0.00013045	0.00026091	0.019349	TRUE
BRUGEN04120	CST1	141.01/156.66/143.79	146.33/225.72/223.19	143.79	223.19	0.63077	86.679	472.93	3.6511	0.99987	0.00013055	0.00026109	0.019349	TRUE
BRUGEN19965	UGT2B15	466.34/381.66/397.72	554.84/437.88/532.81	397.72	532.81	0.42096	2483.6	1370.5	3.6492	0.99987	0.00013155	0.00026309	0.019478	TRUE
BRUGEN20704	ZBTB16	1548.1/1370/1488.9	1219.4/1119.9/1260.3	1488.9	1219.4	-0.2878	8821.7	5457.4	3.6474	0.00013247	0.99987	0.00026495	0.019597	FALSE
BRUGEN17822	SNAP25	157.13/121.96/108.1	143.28/194.72/207.99	121.96	194.72	0.67059	714.34	398.16	3.6464	0.99987	0.00013298	0.00026595	0.019652	TRUE
BRUGEN26241	PJA2	401.88/366.94/413.01	549.76/481.48/537.56	401.88	537.56	0.41875	672.33	1385.5	3.6451	0.99987	0.00013367	0.00026734	0.019724	TRUE
BRUGEN51743	COL21A1	227.63/193.46/256.99	225.6/328.41/328.61	227.63	328.41	0.52688	1014.7	764.51	3.645	0.99987	0.00013371	0.00026743	0.019724	TRUE
BRUGEN34420	SS18L1	742.32/672.9/630.23	850.56/738.2/883.26	672.9	850.56	0.33757	3320	2376.1	3.6446	0.99987	0.00013388	0.00026777	0.01973	TRUE
BRUGEN57671	PHACTR3	326.34/389.02/404.85	522.32/525.07/503.36	389.02	522.32	0.42416	2089.9	1339.1	3.6428	0.99987	0.00013485	0.00026969	0.019853	TRUE
BRUGEN38512	ARL17A	460.3/439.49/390.58	327.22/297.41/204.2	439.49	297.41	-0.56179	1412.6	1521.4	3.6424	0.00013504	0.99986	0.00027009	0.019863	FALSE
BRUGEN17434	SLC1A3	115.83/186.1/160.11	243.89/198.6/281.12	160.11	243.89	0.60411	1318	529.17	3.6421	0.99986	0.00013522	0.00027044	0.01987	TRUE
BRUGEN45958	EBF4	298.14/394.28/290.64	346.52/422.38/414.09	298.14	414.09	0.47262	4649.6	1013.8	3.6418	0.99986	0.00013539	0.00027078	0.019876	TRUE
BRUGEN73495	CT45A6	35.253/26.285/23.455	67.069/51.345/58.884	26.285	58.884	1.1341	44.212	80.148	3.6413	0.99986	0.00013585	0.0002717	0.019906	TRUE
BRUGEN46240	ZNF317	339.43/332.24/304.91	463.39/371.04/454.93	332.24	454.93	0.45223	399.26	1135.4	3.6409	0.99986	0.00013582	0.00027165	0.019906	TRUE
BRUGEN65429	TBCEL	392.81/396.38/443.61	552.81/463.07/530.91	396.38	530.91	0.42066	1121.5	1365.7	3.6403	0.99986	0.00013614	0.00027228	0.01993	TRUE
BRUGEN60015	IL17RE	790.66/863.2/729.14	983.68/935.83/997.23	790.66	983.68	0.31476	4523.3	2813	3.6392	0.99986	0.00013677	0.00027353	0.019982	TRUE
BRUGEN56197	TMEM129	1046.5/1072.4/1051.4	852.59/827.33/649.63	1051.4	827.33	-0.3454	233.26	3791.1	3.6391	0.00013679	0.99986	0.00027359	0.019982	FALSE
BRUGEN24691	SLC22A13	343.46/295.44/278.4	453.22/410.76/365.65	295.44	410.76	0.47404	1298	1004.2	3.6389	0.99986	0.0001369	0.00027379	0.019982	TRUE
BRUGEN03965	CRYBB3	334.4/338.55/363.04	462.37/409.79/491.97	338.55	462.37	0.44853	308.53	1158	3.6386	0.99986	0.00013707	0.00027413	0.019982	TRUE
BRUGEN60902	CTCFL	922.61/919.98/757.7	748.94/711.08/571.75	919.98	711.08	-0.37113	13171	3296.4	3.6385	0.00013714	0.99986	0.00027428	0.019982	FALSE
BRUGEN16317	RPL7	60.433/68.341/68.325	121.94/101.72/122.52	68.325	121.94	0.82654	31.146	217.33	3.6371	0.99986	0.00013786	0.00027572	0.020068	TRUE
BRUGEN20965	BTG2	920.59/891.59/886.19	1221.5/1086/1097	891.59	1097	0.29875	435.2	3190	3.636	0.99986	0.00013843	0.00027687	0.020125	TRUE
BRUGEN39213	YPEL5	553.97/493.11/516.01	361.77/295.47/601.19	516.01	361.77	-0.51115	982.66	1799.7	3.6359	0.00013851	0.99986	0.00027703	0.020125	FALSE
BRUGEN34316	GORASP2	287.06/297.55/355.9	459.32/361.35/413.14	297.55	413.14	0.47216	1757.8	1011.7	3.6342	0.99986	0.00013944	0.00027889	0.02022	TRUE
BRUGEN42490	C17orf85	238.71/223.95/229.45	316.04/330.35/358.05	229.45	330.35	0.5239	58	770.91	3.634	0.99986	0.00013951	0.00027902	0.02022	TRUE
BRUGEN57635	DNTTIP1	445.19/486.8/401.79	664.59/530.89/587.89	445.19	587.89	0.40035	1807.3	1542.1	3.6339	0.99986	0.00013956	0.00027912	0.02022	TRUE
BRUGEN07110	GH2	101.73/113.55/96.879	167.67/135.63/177.6	101.73	167.67	0.71538	81.649	329.4	3.6334	0.99986	0.00013987	0.00027973	0.020245	TRUE
BRUGEN49788	KCTD17	1025.3/1012.5/1002.4	1024.3/1310.7/1231.8	1012.5	1231.8	0.28261	133.03	3644.4	3.633	0.99986	0.00014009	0.00028018	0.020248	TRUE
BRUGEN21068	PRRC2A	412.96/359.58/366.1	494.89/417.54/496.72	366.1	494.89	0.43383	1119	1256.7	3.6329	0.99986	0.00014015	0.0002803	0.020248	TRUE
BRUGEN44656	ENY2	236.7/177.69/176.42	308.92/260.6/265.93	177.69	265.93	0.57902	1741.8	590.07	3.6326	0.99986	0.00014027	0.00028055	0.020248	TRUE
BRUGEN63931	MIER3	487.49/418.46/409.95	578.22/490.2/556.55	418.46	556.55	0.41057	2419	1445.3	3.6323	0.99986	0.00014045	0.00028091	0.020255	TRUE
BRUGEN11119	MAP6	244.75/200.82/206	342.46/301.29/295.37	206	301.29	0.54632	764.47	688.7	3.6311	0.99986	0.0001411	0.0002822	0.020329	TRUE
BRUGEN51661	STMN4	546.92/631.89/385.48	388.19/442.73/365.65	546.92	388.19	-0.4935	16642	1912.7	3.6295	0.000142	0.99986	0.000284	0.02044	FALSE
BRUGEN46517	SQRDL	171.23/165.07/245.77	172.75/257.69/278.28	171.23	257.69	0.58693	2797.1	567.65	3.6292	0.99986	0.00014218	0.00028435	0.020446	TRUE
BRUGEN03192	CHRM1	176.26/187.15/174.38	302.83/203.44/264.03	176.26	264.03	0.58026	61.033	585.12	3.6283	0.99986	0.00014264	0.00028528	0.020494	TRUE
BRUGEN55622	ANGEL2	73.527/52.57/59.147	108.73/105.6/115.87	59.147	108.73	0.86742	125.01	186.93	3.6268	0.99986	0.00014349	0.00028699	0.020598	TRUE
BRUGEN35721	AGO2	131.95/208.18/129.51	218.48/207.32/149.11	131.95	207.32	0.64795	2908.7	432.29	3.6251	0.99986	0.00014441	0.00028882	0.02071	TRUE
BRUGEN25092	SCAMP1	179.28/130.37/138.69	217.47/216.04/150.06	138.69	216.04	0.6357	858.51	455.41	3.6244	0.99986	0.00014483	0.00028967	0.02074	TRUE
BRUGEN17514	SLC5A5	293.1/298.6/298.8	422.74/389.45/414.09	298.6	414.09	0.47039	15.14	1015.4	3.6243	0.99986	0.00014489	0.00028977	0.02074	TRUE
BRUGEN28767	NPRL2	156.12/179.79/194.78	229.66/268.35/336.21	179.79	268.35	0.57516	392.5	597.37	3.6234	0.99985	0.00014539	0.00029079	0.020793	TRUE
BRUGEN19132	TH	308.21/300.7/277.38	467.45/416.57/369.45	300.7	416.57	0.4689	300.1	1022.9	3.6229	0.99985	0.00014567	0.00029135	0.020807	TRUE
BRUGEN21211	SLC25A16	312.24/237.62/243.73	347.54/308.07/354.25	243.73	347.54	0.51014	2365.4	821.14	3.6227	0.99985	0.00014576	0.00029152	0.020807	TRUE
BRUGEN26564	USP15	304.18/295.44/359.98	420.71/297.41/420.74	304.18	420.71	0.46658	1595.2	1035.3	3.6216	0.99985	0.00014642	0.00029284	0.020846	TRUE
BRUGEN19232	TKT	193.39/175.58/123.39	93.49/88.158/77.879	175.58	88.158	-0.98592	1520.4	582.77	3.6216	0.00014642	0.99985	0.00029284	0.020846	FALSE
BRUGEN18822	HNF1A	1038.4/904.21/851.52	1068/1231.3/1110.3	904.21	1110.3	0.29587	10397	3237.3	3.6213	0.99985	0.00014655	0.00029309	0.020846	TRUE
BRUGEN70070	LCE1E	156.12/176.64/91.78	227.63/238.32/286.82	156.12	238.32	0.60707	2280.2	515.4	3.6207	0.99985	0.00014689	0.00029378	0.020846	TRUE
BRUGEN50587	RMI1	247.77/152.45/117.27	239.82/229.6/233.64	152.45	233.64	0.61263	5161.8	502.76	3.6207	0.99985	0.00014692	0.00029384	0.020846	TRUE
BRUGEN56539	SDR42E1	141.01/121.96/143.79	254.05/218.94/209.89	141.01	218.94	0.63113	185.26	463.38	3.6203	0.99985	0.00014711	0.00029422	0.020846	TRUE
BRUGEN01820	BNIP1	114.82/90.421/95.86	170.72/150.16/159.56	95.86	159.56	0.72912	194.59	309.57	3.6203	0.99985	0.00014712	0.00029425	0.020846	TRUE
BRUGEN59350	ZNF684	497.56/467.87/406.89	369.9/309.04/321.96	467.87	321.96	-0.53783	2300.1	1624.4	3.6203	0.00014715	0.99985	0.00029429	0.020846	FALSE
BRUGEN77284	NonTargetingControl	615.41/543.58/529.27	683.9/701.39/774.99	543.58	701.39	0.36714	2682.3	1900.4	3.6201	0.99985	0.00014724	0.00029449	0.020846	TRUE
BRUGEN24769	FADS2	623.47/603.51/596.57	680.85/770.17/832.93	603.51	770.17	0.3513	223.24	2120.2	3.6196	0.99985	0.00014755	0.0002951	0.02087	TRUE
BRUGEN40519	ROPN1	190.36/105.14/169.28	75.198/101.72/83.578	169.28	83.578	-1.0096	2279.4	560.92	3.6188	0.000148	0.99985	0.000296	0.020915	FALSE
BRUGEN40283	GNB1L	219.57/255.49/217.21	319.09/317.76/232.69	219.57	317.76	0.5312	647.84	736.24	3.6185	0.99985	0.00014814	0.00029629	0.020916	TRUE
BRUGEN04707	DES	224.61/229.21/271.26	300.79/330.35/329.56	229.21	329.56	0.52199	894.92	770.05	3.6164	0.99985	0.00014934	0.00029867	0.021065	TRUE
BRUGEN76938	NonTargetingControl	290.08/277.57/273.3	393.27/341.01/388.45	277.57	388.45	0.48338	87.329	940.75	3.6149	0.99985	0.00015023	0.00030047	0.021172	TRUE
BRUGEN28240	SEC23B	355.55/313.32/392.62	481.68/387.51/494.82	355.55	481.68	0.43697	1578.7	1218.8	3.6128	0.99985	0.00015145	0.0003029	0.021324	TRUE
BRUGEN15923	RBMS1	89.642/124.07/76.484	106.7/168.57/151.01	89.642	151.01	0.74591	679.06	288.62	3.6122	0.99985	0.00015179	0.00030357	0.021345	TRUE
BRUGEN05169	DUSP8	365.62/271.26/262.08	366.85/380.73/415.99	271.26	380.73	0.48754	4493.7	918.4	3.6121	0.99985	0.00015187	0.00030375	0.021345	TRUE
BRUGEN53487	C16orf13	380.73/384.81/459.92	516.23/485.35/642.98	384.81	516.23	0.42289	2829	1324	3.6116	0.99985	0.00015217	0.00030434	0.021367	TRUE
BRUGEN75448	KRTAP4-7	349.5/353.27/287.58	224.58/246.07/149.11	349.5	224.58	-0.63579	1924.5	1197.2	3.6105	0.0001528	0.99985	0.0003056	0.021437	FALSE
BRUGEN49583	NLRX1	214.54/185.05/226.39	107.72/147.25/117.77	214.54	117.77	-0.85978	505.09	718.59	3.6099	0.00015316	0.99985	0.00030632	0.021457	FALSE
BRUGEN22532	DCHS1	325.33/321.73/371.2	460.34/445.63/361.85	325.33	445.63	0.45276	1058.5	1110.7	3.6098	0.99985	0.00015322	0.00030645	0.021457	TRUE
BRUGEN50198	ALG13	86.62/56.776/30.593	23.373/8.7189/4.7487	56.776	8.7189	-2.5716	788.11	179.1	3.6089	0.00015372	0.99985	0.00030744	0.021507	FALSE
BRUGEN73991	PPIAL4D	41.296/76.752/47.93	118.89/79.439/92.125	47.93	92.125	0.92846	437.38	150.07	3.6077	0.99985	0.00015444	0.00030888	0.021588	TRUE
BRUGEN44556	C1GALT1	524.76/506.78/458.9	445.09/351.66/355.2	506.78	355.2	-0.51149	1307.7	1766	3.6068	0.00015499	0.99985	0.00030998	0.02163	FALSE
BRUGEN35990	MOCS3	144.03/105.14/88.721	171.74/163.72/281.12	105.14	171.74	0.7026	891.07	340.95	3.6067	0.99984	0.00015508	0.00031016	0.02163	TRUE
BRUGEN36955	UBQLN1	309.22/298.6/331.43	377.01/426.26/458.73	309.22	426.26	0.46184	303.09	1053.2	3.6065	0.99984	0.00015515	0.00031031	0.02163	TRUE
BRUGEN33482	GSPT2	502.6/573.02/475.22	653.41/697.51/598.34	502.6	653.41	0.37792	2854	1750.8	3.6043	0.99984	0.00015648	0.00031295	0.021794	TRUE
BRUGEN03569	COL4A3	169.21/157.71/190.7	255.07/183.1/254.53	169.21	254.53	0.58617	296.99	560.67	3.6032	0.99984	0.00015714	0.00031428	0.021853	TRUE
BRUGEN52840	FAM186B	445.19/492.06/466.04	321.12/312.91/450.18	466.04	321.12	-0.53596	555.82	1617.7	3.6031	0.0001572	0.99984	0.0003144	0.021853	FALSE
BRUGEN01067	TRIM23	429.07/507.83/436.47	572.12/644.23/576.49	436.47	576.49	0.40063	2573.5	1510.5	3.6029	0.99984	0.00015732	0.00031464	0.021853	TRUE
BRUGEN29949	SLC35D2	175.26/230.26/139.71	152.43/280.94/262.13	175.26	262.13	0.57811	2144.3	581.63	3.6022	0.99984	0.00015777	0.00031553	0.021895	TRUE
BRUGEN55397	ZNF616	646.63/658.18/550.68	574.15/474.7/469.17	646.63	474.7	-0.44513	4669.8	2279.1	3.6015	0.00015819	0.99984	0.00031638	0.02193	FALSE
BRUGEN26439	RNF10	136.98/101.99/123.39	201.21/195.69/172.85	123.39	195.69	0.66102	321.45	403.05	3.6012	0.99984	0.00015837	0.00031674	0.02193	TRUE
BRUGEN30333	NUDT5	666.78/690.77/599.63	866.82/739.17/841.47	666.78	841.47	0.33527	2542.1	2353.4	3.6011	0.99984	0.00015844	0.00031688	0.02193	TRUE
BRUGEN35723	NAAA	222.59/205.02/147.87	110.77/92.033/177.6	205.02	110.77	-0.88234	1787.7	685.3	3.6006	0.00015872	0.99984	0.00031744	0.021949	FALSE
BRUGEN46679	RRAGD	31.224/24.182/54.048	84.344/44.563/66.482	31.224	66.482	1.0664	285.28	95.928	3.5999	0.99984	0.00015929	0.00031858	0.022008	TRUE
BRUGEN45160	JPH2	506.63/544.63/481.34	579.23/657.8/741.75	506.63	657.8	0.37605	1041.8	1765.5	3.5977	0.99984	0.00016052	0.00032105	0.022159	TRUE
BRUGEN42273	DDX19A	333.39/263.9/273.3	333.31/433.04/382.75	273.3	382.75	0.48439	1849.4	925.62	3.5973	0.99984	0.00016075	0.0003215	0.02217	TRUE
BRUGEN21236	CUL5	88.635/74.65/106.06	149.38/110.44/150.06	88.635	149.38	0.74649	249.56	285.23	3.5968	0.99984	0.00016106	0.00032212	0.022193	TRUE
BRUGEN66496	C8orf46	363.6/619.28/441.57	542.65/584.17/582.19	441.57	582.19	0.39808	18830	1529	3.5964	0.99984	0.0001613	0.0003226	0.022207	TRUE
BRUGEN55695	KIFC2	131.95/94.626/103	168.69/137.57/176.65	103	168.69	0.70633	454.01	333.7	3.5961	0.99984	0.00016154	0.00032307	0.022219	TRUE
BRUGEN15646	RAB3A	315.26/420.56/351.82	690/476.64/363.75	351.82	476.64	0.43696	3030.9	1205.5	3.5947	0.99984	0.00016236	0.00032472	0.022301	TRUE
BRUGEN13167	OXT	888.36/786.45/769.94	976.56/896.11/1032.4	786.45	976.56	0.312	5329.6	2797.3	3.5945	0.99984	0.00016249	0.00032498	0.022301	TRUE
BRUGEN29149	ZNF266	502.6/413.2/391.6	572.12/532.82/548.95	413.2	548.95	0.40897	4229.5	1426.4	3.5944	0.99984	0.00016256	0.00032512	0.022301	TRUE
BRUGEN49019	GDPD3	198.42/119.86/136.65	213.4/157.91/212.74	136.65	212.74	0.63486	2048.8	448.41	3.5933	0.99984	0.00016323	0.00032646	0.022357	TRUE
BRUGEN56005	CHMP7	419/387.97/366.1	519.28/501.82/570.8	387.97	519.28	0.41963	720.6	1335.4	3.5933	0.99984	0.00016326	0.00032651	0.022357	TRUE
BRUGEN50552	ANKRD53	440.15/232.36/407.91	542.65/353.6/550.85	407.91	542.65	0.41088	15929	1407.3	3.5917	0.99984	0.00016429	0.00032857	0.022449	TRUE
BRUGEN62109	LELP1	195.4/243.93/241.69	139.22/124.97/164.31	241.69	139.22	-0.79142	1073.8	813.95	3.5917	0.00016429	0.99984	0.00032858	0.022449	FALSE
BRUGEN49998	GSTCD	85.613/71.495/83.622	143.28/100.75/142.46	83.622	142.46	0.76156	75.511	268.4	3.5915	0.99984	0.00016436	0.00032873	0.022449	TRUE
BRUGEN75161	C20orf78	219.57/178.74/183.56	270.31/272.22/281.12	183.56	272.22	0.56599	660.06	610.47	3.5885	0.99983	0.0001663	0.0003326	0.022693	TRUE
BRUGEN06330	FHL1	860.16/801.17/997.35	667.64/1226.5/1059	860.16	1059	0.29966	11150	3072.4	3.5866	0.99983	0.0001675	0.000335	0.02283	TRUE
BRUGEN22946	MPDZ	1042.5/1012.5/1083	1266.2/1262.3/1166.3	1042.5	1262.3	0.27582	1270.8	3757.4	3.5865	0.99983	0.0001676	0.0003352	0.02283	TRUE
BRUGEN71474	SPATA31D1	477.42/564.6/487.46	635.12/586.11/663.87	487.46	635.12	0.38108	3026.3	1695.6	3.5861	0.99983	0.00016785	0.0003357	0.022844	TRUE
BRUGEN75571	CMC4	455.26/485.75/392.62	396.32/597.73/610.69	455.26	597.73	0.39205	2426.9	1578.6	3.5858	0.99983	0.00016802	0.00033605	0.022848	TRUE
BRUGEN47127	ELMO2	666.78/700.23/765.86	949.13/878.67/814.88	700.23	878.67	0.32707	2712.8	2477.2	3.5852	0.99983	0.00016842	0.00033684	0.022882	TRUE
BRUGEN11771	MSI1	312.24/299.65/322.25	347.54/429.17/544.2	312.24	429.17	0.45764	129.36	1064	3.5847	0.99983	0.00016873	0.00033746	0.022904	TRUE
BRUGEN43260	TMEM30A	432.1/414.25/434.43	315.02/293.54/272.58	432.1	293.54	-0.55623	161.89	1494.7	3.5839	0.00016923	0.99983	0.00033847	0.022951	FALSE
BRUGEN21573	BRAP	307.2/280.72/260.04	452.21/380.73/391.29	280.72	391.29	0.47765	564.32	951.94	3.5837	0.99983	0.00016937	0.00033874	0.022951	TRUE
BRUGEN36154	PPP2R3B	621.45/562.5/524.17	721.5/590.95/732.25	562.5	721.5	0.35858	2472.3	1969.7	3.5825	0.99983	0.00017014	0.00034028	0.023035	TRUE
BRUGEN46216	VAT1L	801.74/1007.2/823.98	864.78/1061.8/1018.1	823.98	1018.1	0.30489	17040	2937.3	3.5822	0.99983	0.00017036	0.00034073	0.023045	TRUE
BRUGEN18237	TRIM21	1156.3/1023/875.99	1216.4/1374.7/1240.4	1023	1240.4	0.27769	19688	3684	3.581	0.99983	0.00017115	0.00034231	0.023132	TRUE
BRUGEN39674	MYO3A	322.31/259.7/263.1	369.9/396.23/324.81	263.1	369.9	0.48991	1758.4	889.53	3.5806	0.99983	0.0001714	0.0003428	0.023145	TRUE
BRUGEN26261	FCHSD2	504.61/519.39/571.08	671.71/618.08/772.14	519.39	671.71	0.37037	1444.9	1812	3.5781	0.99983	0.00017306	0.00034612	0.023349	TRUE
BRUGEN64159	CLEC4C	332.38/290.19/330.41	240.84/210.22/194.7	330.41	210.22	-0.64985	810.85	1128.8	3.5772	0.00017368	0.99983	0.00034736	0.023387	FALSE
BRUGEN06965	GCDH	741.31/779.09/724.05	924.74/983.3/841.47	741.31	924.74	0.31858	862.7	2629.5	3.5771	0.99983	0.00017373	0.00034745	0.023387	TRUE
BRUGEN40549	CFAP46	249.79/242.87/235.57	137.19/210.22/140.56	242.87	140.56	-0.7847	50.587	818.13	3.577	0.0001738	0.99983	0.0003476	0.023387	FALSE
BRUGEN14871	PRKDC	272.96/228.15/298.8	341.44/381.7/415.04	272.96	381.7	0.48226	1337.4	924.4	3.5765	0.99983	0.0001741	0.00034819	0.023392	TRUE
BRUGEN39207	PPIL1	333.39/328.04/328.37	448.14/470.82/405.54	328.37	448.14	0.44746	12.647	1121.6	3.5764	0.99983	0.00017418	0.00034835	0.023392	TRUE
BRUGEN04237	CTSB	137.99/105.14/126.45	199.17/197.63/200.4	126.45	199.17	0.65129	293.65	413.5	3.5762	0.99983	0.00017429	0.00034857	0.023392	TRUE
BRUGEN55399	ZNF766	30.216/17.874/20.396	50.81/48.439/42.739	20.396	48.439	1.2083	51.404	61.505	3.5757	0.99982	0.00017543	0.00035087	0.023484	TRUE
BRUGEN65472	OR10Q1	376.7/405.84/429.33	695.08/539.61/518.56	405.84	539.61	0.41011	700.48	1399.8	3.5752	0.99983	0.00017495	0.00034989	0.02346	TRUE
BRUGEN72843	TMEM41B	97.7/69.393/48.95	175.8/94.94/122.52	69.393	122.52	0.81121	609.61	220.87	3.5746	0.99982	0.00017541	0.00035082	0.023484	TRUE
BRUGEN53262	HSDL2	129.93/145.09/144.81	211.37/222.82/256.43	144.81	222.82	0.61824	110.72	476.43	3.5739	0.99982	0.00017588	0.00035175	0.023523	TRUE
BRUGEN19166	THRA	446.2/363.79/435.45	296.73/334.23/283.02	435.45	296.73	-0.55181	2625.4	1506.8	3.5736	0.00017606	0.99982	0.00035212	0.023528	FALSE
BRUGEN21642	HIST1H2AM	191.37/138.79/131.55	222.55/215.07/129.17	138.79	215.07	0.62827	1408.8	455.74	3.5732	0.99982	0.00017629	0.00035258	0.023534	TRUE
BRUGEN30223	CDC42EP1	497.56/565.66/509.89	660.53/523.14/667.67	509.89	660.53	0.37278	1630.8	1777.4	3.5731	0.99982	0.00017641	0.00035282	0.023534	TRUE
BRUGEN34290	REXO2	421.02/320.68/280.44	442.05/438.85/279.22	320.68	438.85	0.4514	5843.4	1094.1	3.5727	0.99982	0.00017665	0.0003533	0.023545	TRUE
BRUGEN65389	HYLS1	427.06/342.76/363.04	437.98/491.17/489.12	363.04	489.12	0.42902	2254.8	1245.7	3.5721	0.99982	0.00017709	0.00035417	0.023577	TRUE
BRUGEN60884	WFDC3	292.09/229.21/261.06	356.68/367.16/406.49	261.06	367.16	0.49043	988.85	882.32	3.5719	0.99982	0.00017719	0.00035438	0.023577	TRUE
BRUGEN04813	DLG4	407.92/390.07/393.64	223.56/415.6/262.13	393.64	262.13	-0.58475	108.4	1355.8	3.5715	0.00017745	0.99982	0.0003549	0.023586	FALSE
BRUGEN25235	GTPBP1	529.8/406.89/418.11	553.83/539.61/598.34	418.11	553.83	0.40471	6299.6	1444.1	3.5714	0.99982	0.00017756	0.00035513	0.023586	TRUE
BRUGEN00975	APOC3	827.93/856.89/790.33	1104.6/963.93/1021.9	827.93	1021.9	0.30338	1126.3	2952	3.5705	0.99982	0.00017814	0.00035627	0.023642	TRUE
BRUGEN03627	COL9A3	436.12/383.76/409.95	646.3/534.76/544.2	409.95	544.2	0.40782	685.44	1414.6	3.5694	0.99982	0.00017888	0.00035777	0.023721	TRUE
BRUGEN19178	THY1	346.48/289.14/295.74	413.59/408.82/386.55	295.74	408.82	0.46581	1309.3	1005.2	3.5667	0.99982	0.00018075	0.00036151	0.023928	TRUE
BRUGEN13032	OMP	370.66/308.06/262.08	465.42/396.23/423.59	308.06	423.59	0.45816	3015.9	1049.1	3.5667	0.99982	0.00018076	0.00036151	0.023928	TRUE
BRUGEN35101	TIMM10B	947.79/1017.8/794.41	1033.5/1155.7/1155.8	947.79	1155.7	0.28591	14210	3400.9	3.5659	0.99982	0.00018128	0.00036257	0.023977	TRUE
BRUGEN21987	CUL1	24.173/12.617/22.435	51.826/31.001/59.834	22.435	51.826	1.1726	49.71	67.937	3.5658	0.99982	0.00018197	0.00036393	0.024006	TRUE
BRUGEN38408	THEG	172.23/217.64/174.38	260.15/234.44/342.86	174.38	260.15	0.57435	937.93	578.6	3.5654	0.99982	0.00018162	0.00036324	0.023988	TRUE
BRUGEN76286	PYURF	298.14/280.72/204.98	170.72/215.07/161.46	280.72	170.72	-0.71422	3020.5	951.94	3.5654	0.00018167	0.99982	0.00036335	0.023988	FALSE
BRUGEN34599	LDLRAP1	17.123/35.748/24.475	28.453/55.22/73.13	24.475	55.22	1.142	90.567	74.396	3.5645	0.99982	0.00018267	0.00036533	0.024078	TRUE
BRUGEN17611	SLC11A1	224.61/161.92/186.62	281.49/217/275.43	186.62	275.43	0.55908	1026.7	621.12	3.5633	0.99982	0.0001831	0.0003662	0.024115	TRUE
BRUGEN55928	BOC	651.67/535.16/645.52	475.58/607.42/461.58	645.52	475.58	-0.43998	6108.3	2275	3.563	0.00018334	0.99982	0.00036667	0.024125	FALSE
BRUGEN58579	SLC24A4	610.37/550.94/621.05	775.36/699.45/791.14	610.37	775.36	0.34467	1823.3	2145.5	3.5619	0.99982	0.00018409	0.00036819	0.024191	TRUE
BRUGEN26437	RNF10	432.1/383.76/347.75	513.18/535.73/415.99	383.76	513.18	0.4183	1816.6	1320.2	3.5618	0.99982	0.00018417	0.00036834	0.024191	TRUE
BRUGEN41899	FAM86C1	132.95/118.81/100.96	211.37/188.91/186.15	118.81	188.91	0.66459	259.34	387.41	3.5616	0.99982	0.0001843	0.00036861	0.024191	TRUE
BRUGEN47352	SMOC2	320.29/258.65/271.26	154.46/293.54/163.36	271.26	163.36	-0.72817	1281.7	918.4	3.5607	0.00018497	0.99982	0.00036993	0.024257	FALSE
BRUGEN61049	DEFB129	362.6/357.48/386.5	447.13/528.95/488.17	362.6	488.17	0.42799	298.71	1244.1	3.5601	0.99981	0.00018539	0.00037078	0.024293	TRUE
BRUGEN04913	DNASE2	489.51/515.19/469.1	706.26/576.42/636.33	489.51	636.33	0.37777	537.98	1703.1	3.5577	0.99981	0.00018702	0.00037405	0.024484	TRUE
BRUGEN11717	MPP3	816.85/668.69/734.24	540.62/634.54/552.75	734.24	552.75	-0.40898	5560.5	2603.3	3.5571	0.00018748	0.99981	0.00037495	0.024484	FALSE
BRUGEN52255	NUDT12	73.527/108.29/80.563	160.56/103.66/137.71	80.563	137.71	0.76612	409.28	258.15	3.557	0.99981	0.00018755	0.0003751	0.024484	TRUE
BRUGEN23863	USP2	595.26/611.92/678.16	856.65/683.95/776.89	611.92	776.89	0.34388	2332.4	2151.2	3.5569	0.99981	0.0001876	0.00037519	0.024484	TRUE
BRUGEN45882	DOCK6	137.99/169.28/127.47	155.48/224.75/213.69	137.99	213.69	0.62731	544.75	453	3.5569	0.99981	0.00018765	0.00037529	0.024484	TRUE
BRUGEN75584	WASH1	39.281/27.336/12.237	89.425/31.001/59.834	27.336	59.834	1.1022	185.33	83.497	3.5564	0.99981	0.00018824	0.00037648	0.024539	TRUE
BRUGEN55548	ZNF700	327.34/462.62/369.16	385.14/518.29/495.77	369.16	495.77	0.42441	5241.4	1267.7	3.5558	0.99981	0.00018838	0.00037676	0.024539	TRUE
BRUGEN43796	NSFL1C	470.37/406.89/431.37	407.49/568.67/571.75	431.37	568.67	0.39786	1060.1	1492	3.5545	0.99981	0.00018932	0.00037865	0.024622	TRUE
BRUGEN74176	C7orf73	439.15/487.85/460.94	645.28/490.2/603.09	460.94	603.09	0.38705	599.6	1599.2	3.5545	0.99981	0.00018934	0.00037868	0.024622	TRUE
BRUGEN08224	HCCS	466.34/391.12/436.47	593.46/538.64/574.6	436.47	574.6	0.39588	1474.3	1510.5	3.5541	0.99981	0.00018966	0.00037933	0.024644	TRUE
BRUGEN38961	ZC3HC1	359.58/319.63/277.38	436.96/393.32/442.58	319.63	436.96	0.44992	1690.3	1090.3	3.5535	0.99981	0.00019007	0.00038014	0.024676	TRUE
BRUGEN65221	GSX1	156.12/161.92/237.61	213.4/244.13/258.33	161.92	244.13	0.58942	2881.5	535.43	3.553	0.99981	0.00019043	0.00038085	0.024702	TRUE
BRUGEN72602	OR4C45	280.01/319.63/272.28	430.87/365.23/389.4	280.01	389.4	0.47434	814.74	949.39	3.5502	0.99981	0.00019246	0.00038492	0.024944	TRUE
BRUGEN56196	TMEM129	615.41/591.94/573.12	651.38/753.7/818.68	591.94	753.7	0.34802	452.52	2077.7	3.5488	0.99981	0.00019348	0.00038696	0.025056	TRUE
BRUGEN71463	SPATA31A6	351.52/284.93/269.22	448.14/395.26/329.56	284.93	395.26	0.47078	2340.3	966.86	3.5482	0.99981	0.00019396	0.00038792	0.025097	TRUE
BRUGEN22140	NIPSNAP1	115.83/94.626/99.939	168.69/163.72/145.31	99.939	163.72	0.70656	140.37	323.34	3.5471	0.99981	0.00019474	0.00038947	0.025172	TRUE
BRUGEN14023	PITPNA	309.22/255.49/302.88	189.01/184.07/236.49	302.88	189.01	-0.67739	1142.7	1030.6	3.5467	0.00019502	0.9998	0.00039003	0.025172	FALSE
BRUGEN41519	SOBP	229.65/200.82/169.28	292.66/270.29/364.7	200.82	292.66	0.54111	912.7	670.61	3.5467	0.9998	0.00019503	0.00039006	0.025172	TRUE
BRUGEN64986	CCDC125	88.635/77.804/87.701	137.19/147.25/149.11	87.701	147.25	0.74104	49.415	282.09	3.5457	0.9998	0.00019579	0.00039159	0.025244	TRUE
BRUGEN17354	ST3GAL2	198.42/243.93/192.74	251/289.66/320.06	198.42	289.66	0.54352	1051.5	662.24	3.5455	0.9998	0.00019591	0.00039182	0.025244	TRUE
BRUGEN25469	CTR9	94.678/67.29/67.306	127.02/119.16/71.231	67.306	119.16	0.81487	374.63	213.94	3.5451	0.9998	0.00019622	0.00039244	0.025262	TRUE
BRUGEN60821	ZNF358	1202.6/1419.4/1166.6	1475.5/1436.7/1389.5	1202.6	1436.7	0.25638	24144	4363.9	3.5433	0.9998	0.00019754	0.00039509	0.025371	TRUE
BRUGEN40330	ARL15	243.75/220.79/192.74	327.22/254.79/317.21	220.79	317.21	0.52077	656.95	740.52	3.5432	0.9998	0.00019764	0.00039527	0.025371	TRUE
BRUGEN06614	FTL	336.41/323.83/280.44	524.36/342.94/441.63	323.83	441.63	0.44641	1020.5	1105.4	3.5432	0.9998	0.00019768	0.00039536	0.025371	TRUE
BRUGEN36476	SSU72	127.92/153.5/123.39	233.73/175.35/200.4	127.92	200.4	0.6436	337.62	418.5	3.543	0.9998	0.00019781	0.00039562	0.025371	TRUE
BRUGEN45917	PREX1	155.11/159.81/162.15	205.27/242.19/241.24	159.81	241.24	0.59102	13.775	528.16	3.5429	0.9998	0.00019788	0.00039576	0.025371	TRUE
BRUGEN00455	AP2A2	157.13/132.48/116.26	206.29/164.69/210.84	132.48	206.29	0.63505	435.35	434.11	3.5426	0.9998	0.0001981	0.0003962	0.025378	TRUE
BRUGEN56953	CHST14	196.41/193.46/171.32	91.458/181.16/103.52	193.46	103.52	-0.89565	249.32	644.93	3.5414	0.00019899	0.9998	0.00039799	0.025471	FALSE
BRUGEN38816	GPR89B	81.584/70.444/42.831	64.02/17.438/13.296	70.444	17.438	-1.9541	443.3	224.37	3.5404	0.00019977	0.9998	0.00039954	0.02555	FALSE
BRUGEN51949	SBF2	169.21/177.69/147.87	253.03/188.91/268.78	169.21	253.03	0.57768	263.69	560.67	3.5399	0.9998	0.00020011	0.00040022	0.025563	TRUE
BRUGEN21398	NCOA3	394.83/446.85/393.64	525.37/538.64/464.43	394.83	525.37	0.41121	1353.7	1360.1	3.5398	0.9998	0.00020021	0.00040041	0.025563	TRUE
BRUGEN23063	DPM1	672.82/567.76/542.52	808.89/725.61/658.17	567.76	725.61	0.35336	5837.3	1989	3.5394	0.9998	0.00020051	0.00040102	0.025581	TRUE
BRUGEN01057	ARAF	62.447/51.519/50.989	96.539/85.252/97.824	51.519	96.539	0.89314	59.857	161.82	3.539	0.9998	0.00020079	0.00040158	0.025596	TRUE
BRUGEN17586	SLC9A1	332.38/336.45/355.9	216.45/248.01/175.7	336.45	216.45	-0.63399	197.52	1150.4	3.5379	0.00020165	0.9998	0.0004033	0.025684	FALSE
BRUGEN13724	PFDN4	106.76/119.86/109.12	178.85/144.35/175.7	109.12	175.7	0.68229	60.475	354.44	3.5368	0.9998	0.00020249	0.00040499	0.02577	TRUE
BRUGEN28875	DCTN6	42.303/16.822/23.455	55.891/53.282/40.839	23.455	53.282	1.1504	199.62	71.163	3.5358	0.9998	0.00020383	0.00040766	0.025873	TRUE
BRUGEN49123	IRX1	867.21/868.46/795.43	766.21/670.39/639.18	867.21	670.39	-0.3709	2577.1	3098.8	3.5357	0.00020331	0.9998	0.00040663	0.025854	FALSE
BRUGEN06120	FBP1	144.03/124.07/124.41	134.14/195.69/202.3	124.41	195.69	0.64924	192.5	406.53	3.5352	0.9998	0.00020375	0.0004075	0.025873	TRUE
BRUGEN07576	GPR26	518.72/377.45/466.04	318.07/351.66/323.86	466.04	323.86	-0.52372	5311.1	1617.7	3.5349	0.00020397	0.9998	0.00040794	0.025873	FALSE
BRUGEN42491	C17orf85	308.21/295.44/263.1	393.27/413.66/407.44	295.44	407.44	0.46236	604.41	1004.2	3.5342	0.9998	0.00020451	0.00040901	0.02592	TRUE
BRUGEN25379	TRAF4	408.93/473.13/457.88	317.05/353.6/270.68	457.88	317.05	-0.52886	1314.5	1588.1	3.5339	0.00020476	0.9998	0.00040953	0.025931	FALSE
BRUGEN21341	RND2	377.71/288.08/354.88	231.69/248.97/179.5	354.88	231.69	-0.61298	2491.5	1216.5	3.5321	0.00020615	0.99979	0.0004123	0.026085	FALSE
BRUGEN15618	PYGM	167.2/187.15/171.32	272.34/196.66/255.48	171.32	255.48	0.57373	133.75	567.99	3.5312	0.99979	0.00020683	0.00041365	0.02615	TRUE
BRUGEN22241	BCAS1	188.35/217.64/188.66	244.9/277.07/290.62	188.66	277.07	0.55203	419.99	628.22	3.5273	0.99979	0.00020992	0.00041985	0.02652	TRUE
BRUGEN30472	FZD10	217.56/152.45/142.77	167.67/231.54/258.33	152.45	231.54	0.59965	2166.2	502.76	3.527	0.99979	0.00021017	0.00042035	0.02653	TRUE
BRUGEN01774	BMP2	206.48/241.82/254.95	342.46/268.35/412.19	241.82	342.46	0.50023	710.69	814.43	3.5263	0.99979	0.00021068	0.00042136	0.026572	TRUE
BRUGEN35815	GNMT	129.93/170.33/140.73	228.64/186.97/216.54	140.73	216.54	0.61815	496.32	462.42	3.5255	0.99979	0.00021134	0.00042268	0.026634	TRUE
BRUGEN24285	CRLF1	91.657/112.5/110.14	176.82/124.97/179.5	110.14	176.82	0.67807	173.55	357.9	3.5247	0.99979	0.00021197	0.00042394	0.026691	TRUE
BRUGEN59144	NR2C2AP	150.08/108.29/117.27	191.04/131.75/186.15	117.27	186.15	0.66205	578.25	382.18	3.5231	0.99979	0.00021325	0.00042651	0.026831	TRUE
BRUGEN36710	RBM15B	200.44/227.1/189.68	331.28/253.82/291.57	200.44	291.57	0.53847	413.42	669.27	3.5228	0.99979	0.00021351	0.00042703	0.026842	TRUE
BRUGEN26758	GNE	265.9/226.05/194.78	129.06/146.28/82.628	226.05	129.06	-0.80388	1283.1	758.97	3.5208	0.00021515	0.99978	0.0004303	0.027021	FALSE
BRUGEN16838	SC5D	332.38/345.91/362.02	177.83/224.75/250.73	345.91	224.75	-0.61981	221.32	1184.3	3.5206	0.00021529	0.99978	0.00043058	0.027021	FALSE
BRUGEN60081	SPATA18	119.86/177.69/136.65	143.28/211.19/219.39	136.65	211.19	0.62436	982.98	448.41	3.5201	0.99978	0.00021568	0.00043136	0.027038	TRUE
BRUGEN13063	OPRL1	971.96/1036.7/807.67	980.63/1180/1181.5	971.96	1180	0.27951	15591	3491.7	3.52	0.99978	0.00021577	0.00043154	0.027038	TRUE
BRUGEN32753	KCNH4	414.97/437.38/422.19	277.42/347.79/287.77	422.19	287.77	-0.55137	141.48	1458.8	3.5193	0.00021637	0.99978	0.00043274	0.027084	FALSE
BRUGEN51699	C1orf21	342.45/340.65/303.9	220.51/300.32/218.44	340.65	220.51	-0.62514	677.26	1165.5	3.5191	0.00021648	0.99978	0.00043297	0.027084	FALSE
BRUGEN75822	LOC100505478	372.67/391.12/435.45	392.25/520.23/552.75	391.12	520.23	0.41062	1152.6	1346.7	3.5181	0.99978	0.00021729	0.00043457	0.027146	TRUE
BRUGEN16486	RPS2	199.43/199.77/245.77	312.99/263.51/290.62	199.77	290.62	0.53858	1058.1	666.94	3.5181	0.99978	0.00021734	0.00043467	0.027146	TRUE
BRUGEN56908	KTI12	145.04/131.43/125.43	232.71/204.41/192.8	131.43	204.41	0.63333	110.62	430.51	3.5176	0.99978	0.00021775	0.0004355	0.027176	TRUE
BRUGEN20377	XRCC5	36.26/15.771/13.257	64.02/26.157/39.889	15.771	39.889	1.2857	213.05	47.031	3.5168	0.99978	0.00022074	0.00044147	0.027416	TRUE
BRUGEN41804	MRPS10	104.75/83.061/65.266	168.69/140.47/60.784	83.061	140.47	0.75101	393.54	266.51	3.5167	0.99978	0.00021849	0.00043697	0.027246	TRUE
BRUGEN19765	TNFRSF4	254.83/226.05/206	171.74/403.01/322.91	226.05	322.91	0.51259	615.08	758.97	3.5159	0.99978	0.00021912	0.00043823	0.027303	TRUE
BRUGEN03119	RCC1	49.354/23.131/26.514	52.842/58.126/60.784	26.514	58.126	1.1036	266.54	80.878	3.5151	0.99978	0.00022016	0.00044032	0.027367	TRUE
BRUGEN01883	ZFP36L2	1139.2/1217.5/1277.8	1317/1451.2/1618.4	1217.5	1451.2	0.25312	4886.3	4420.5	3.5149	0.99978	0.00022	0.00044	0.027367	TRUE
BRUGEN23060	DPM1	552.96/630.84/514.99	716.42/637.45/707.56	552.96	707.56	0.3551	3753.6	1934.8	3.5147	0.99978	0.00022011	0.00044022	0.027367	TRUE
BRUGEN11085	MAN2B1	405.91/414.25/457.88	592.44/489.23/547.05	414.25	547.05	0.40032	986.57	1430.2	3.5116	0.99978	0.0002227	0.0004454	0.027617	TRUE
BRUGEN10291	TNPO1	761.45/741.24/684.27	923.72/921.3/900.36	741.24	921.3	0.31335	1826.9	2629.2	3.5116	0.99978	0.00022271	0.00044542	0.027617	TRUE
BRUGEN21212	SHOC2	227.63/301.75/285.54	282.5/176.32/155.76	285.54	176.32	-0.69241	1808.1	969.02	3.5087	0.00022514	0.99977	0.00045028	0.027896	FALSE
BRUGEN34358	UPF2	102.74/59.93/78.523	134.14/142.41/83.578	78.523	134.14	0.76498	465.98	251.32	3.5081	0.99977	0.00022564	0.00045128	0.027936	TRUE
BRUGEN64415	C12orf77	173.24/175.58/198.86	268.28/255.76/260.23	175.58	260.23	0.56496	273.56	582.77	3.5064	0.99977	0.00022714	0.00045428	0.028088	TRUE
BRUGEN29021	STAG2	391.81/390.07/340.61	430.87/533.79/518.56	390.07	518.56	0.40986	1224.8	1342.9	3.5062	0.99977	0.00022724	0.00045447	0.028088	TRUE
BRUGEN04844	DMBT1	293.1/301.75/316.13	536.55/274.16/414.09	301.75	414.09	0.45528	140.83	1026.6	3.506	0.99977	0.00022747	0.00045495	0.028095	TRUE
BRUGEN72305	IL17REL	340.44/255.49/240.67	377.01/358.45/328.61	255.49	358.45	0.48686	3717.9	862.63	3.5053	0.99977	0.00022801	0.00045602	0.028139	TRUE
BRUGEN54329	ZC3H10	122.88/141.94/118.29	193.08/184.07/195.65	122.88	193.08	0.64768	192.14	401.29	3.5042	0.99977	0.000229	0.000458	0.028239	TRUE
BRUGEN23965	KCNQ4	546.92/460.51/520.09	370.91/414.63/364.7	520.09	370.91	-0.48657	2134.4	1814.6	3.502	0.0002309	0.99977	0.00046179	0.02845	FALSE
BRUGEN01207	ARSD	246.77/316.47/246.79	335.34/347.79/436.88	246.79	347.79	0.49325	2428	831.92	3.5018	0.99977	0.0002311	0.00046221	0.028453	TRUE
BRUGEN40116	HMGCLL1	430.08/498.37/436.47	489.81/572.54/611.64	436.47	572.54	0.39073	1936.1	1510.5	3.5013	0.99977	0.00023153	0.00046306	0.028483	TRUE
BRUGEN59808	OSR1	194.39/261.8/177.44	283.52/255.76/331.46	194.39	283.52	0.54215	2415.5	648.19	3.5007	0.99977	0.00023202	0.00046405	0.028491	TRUE
BRUGEN10969	SMAD5	112.81/100.93/136.65	179.87/188.91/153.86	112.81	179.87	0.66832	354.73	366.98	3.5005	0.99977	0.00023217	0.00046435	0.028491	TRUE
BRUGEN00036	ABAT	80.577/96.729/156.03	285.55/135.63/158.61	96.729	158.61	0.70767	1888.5	312.5	3.5004	0.99977	0.00023232	0.00046465	0.028491	TRUE
BRUGEN52826	FAM160A2	331.37/274.42/331.43	449.16/396.23/453.03	331.37	449.16	0.43763	1622.1	1132.3	3.5003	0.99977	0.00023233	0.00046467	0.028491	TRUE
BRUGEN17154	SEPW1	179.28/129.32/131.55	205.27/160.82/204.2	131.55	204.2	0.63044	1141.7	430.94	3.4993	0.99977	0.0002332	0.0004664	0.028575	TRUE
BRUGEN52429	INHBE	55.397/32.594/37.732	101.62/75.564/65.532	37.732	75.564	0.98314	169.23	116.89	3.4992	0.99977	0.00023341	0.00046683	0.028578	TRUE
BRUGEN43930	PCDHGA4	84.606/130.37/57.108	142.27/106.56/208.94	84.606	142.27	0.74293	1425.4	271.7	3.4982	0.99977	0.00023422	0.00046844	0.028654	TRUE
BRUGEN59402	C1orf122	427.06/439.49/420.15	292.66/343.91/276.38	427.06	292.66	-0.54364	101.09	1476.4	3.4976	0.0002347	0.99977	0.00046941	0.028691	FALSE
BRUGEN33818	PRDX5	130.94/88.318/89.741	100.6/149.19/164.31	89.741	149.19	0.72697	849.61	288.95	3.4974	0.99977	0.00023495	0.00046989	0.028698	TRUE
BRUGEN65525	CYB561A3	470.37/416.36/409.95	575.17/459.2/548.95	416.36	548.95	0.39803	1479.2	1437.7	3.497	0.99976	0.0002353	0.00047059	0.0287	TRUE
BRUGEN07328	GNAS	469.36/362.73/405.87	511.15/536.7/615.43	405.87	536.7	0.40222	2945.9	1399.9	3.4966	0.99976	0.00023563	0.00047125	0.0287	TRUE
BRUGEN00958	APOBEC1	594.26/657.13/728.12	488.79/481.48/605.94	657.13	488.79	-0.4262	4496.6	2317.8	3.4966	0.00023565	0.99976	0.0004713	0.0287	FALSE
BRUGEN09024	HTR1E	392.81/332.24/438.51	264.21/363.29/229.84	392.81	264.21	-0.57037	2878.3	1352.8	3.4965	0.00023571	0.99976	0.00047141	0.0287	FALSE
BRUGEN18920	PPP1R11	169.21/173.48/151.95	180.88/80.408/86.427	169.21	86.427	-0.96119	158.15	560.67	3.4962	0.00023595	0.99976	0.0004719	0.028708	FALSE
BRUGEN11635	MMP16	493.54/458.41/546.6	609.72/638.42/1021	493.54	638.42	0.37069	2024.9	1717.7	3.4958	0.99976	0.00023636	0.00047271	0.028734	TRUE
BRUGEN50929	TM2D3	834.98/824.3/868.85	843.44/1083.1/1025.7	834.98	1025.7	0.29651	630.73	2978.3	3.4951	0.99976	0.00023692	0.00047383	0.02878	TRUE
BRUGEN23443	FAM127A	612.39/570.91/562.92	414.61/410.76/644.88	570.91	414.61	-0.46057	892.01	2000.6	3.4946	0.0002374	0.99976	0.0004748	0.028806	FALSE
BRUGEN29000	PTGES3	205.47/290.19/229.45	277.42/326.48/336.21	229.45	326.48	0.50693	2132	770.91	3.4945	0.99976	0.0002375	0.000475	0.028806	TRUE
BRUGEN04806	DLG2	522.74/498.37/450.74	684.92/565.76/643.93	498.37	643.93	0.36904	1431.1	1735.3	3.4942	0.99976	0.0002377	0.0004754	0.028807	TRUE
BRUGEN19832	UBE2B	230.65/198.72/181.52	295.71/288.69/215.59	198.72	288.69	0.53658	657.8	663.27	3.4938	0.99976	0.00023814	0.00047627	0.028814	TRUE
BRUGEN60036	SYNPR	326.34/405.84/417.09	240.84/275.13/282.07	405.84	275.13	-0.55912	3223.7	1399.8	3.4937	0.00023822	0.99976	0.00047643	0.028814	FALSE
BRUGEN45635	MKL2	451.23/503.62/450.74	589.39/641.33/570.8	451.23	589.39	0.38461	1372.5	1564	3.4936	0.99976	0.00023831	0.00047662	0.028814	TRUE
BRUGEN11885	MTNR1B	165.18/253.39/253.93	366.85/355.54/340.01	253.39	355.54	0.48703	3890.2	855.21	3.493	0.99976	0.00023877	0.00047754	0.028847	TRUE
BRUGEN50245	ZC3H14	145.04/140.89/131.55	201.21/216.04/231.74	140.89	216.04	0.61318	52.197	462.96	3.4926	0.99976	0.0002392	0.0004784	0.028876	TRUE
BRUGEN54552	CORO6	314.25/310.16/193.76	205.27/196.66/145.31	310.16	196.66	-0.65465	6783.5	1056.6	3.4918	0.00023984	0.99976	0.00047969	0.028919	FALSE
BRUGEN71632	OR5D16	76.548/91.472/95.86	151.41/148.22/152.91	91.472	151.41	0.7209	120.98	294.78	3.4912	0.99976	0.0002404	0.00048081	0.028919	TRUE
BRUGEN45993	KIAA1456	230.65/213.43/194.78	283.52/325.51/306.77	213.43	306.77	0.5213	322.25	714.73	3.4911	0.99976	0.00024051	0.00048103	0.028919	TRUE
BRUGEN31636	CMTR1	175.26/207.13/152.97	111.78/91.064/66.482	175.26	91.064	-0.93695	756.26	581.63	3.491	0.00024065	0.99976	0.0004813	0.028919	FALSE
BRUGEN19753	HIRA	806.78/672.9/676.12	881.04/846.71/795.89	676.12	846.71	0.32416	8541.7	2388	3.4909	0.99976	0.00024068	0.00048136	0.028919	TRUE
BRUGEN62159	LOC149373	117.84/82.009/87.701	146.33/122.07/151.01	87.701	146.33	0.73205	470.5	282.09	3.4909	0.99976	0.00024073	0.00048147	0.028919	TRUE
BRUGEN45331	SNX14	149.07/135.63/126.45	61.988/62.001/132.01	135.63	62.001	-1.1168	132.39	444.92	3.4907	0.00024087	0.99976	0.00048173	0.028919	FALSE
BRUGEN07242	GLRA1	524.76/541.47/613.91	695.08/522.17/693.31	541.47	693.31	0.35604	2763.2	1892.7	3.4901	0.99976	0.00024138	0.00048275	0.028958	TRUE
BRUGEN15926	RBMS2	242.74/198.72/204.98	299.78/171.47/296.32	204.98	296.32	0.52954	732.61	685.14	3.4897	0.99976	0.00024175	0.0004835	0.028981	TRUE
BRUGEN06818	GALC	301.16/346.96/349.79	264.21/226.69/220.34	346.96	226.69	-0.61185	1053.1	1188.1	3.4893	0.00024214	0.99976	0.00048428	0.029005	FALSE
BRUGEN58826	CCDC43	351.52/386.92/387.52	352.62/259.63/257.38	386.92	259.63	-0.57374	626.71	1331.6	3.4882	0.00024316	0.99976	0.00048631	0.029104	FALSE
BRUGEN30156	CIT	385.76/260.75/286.56	395.3/469.85/310.57	286.56	395.3	0.46274	5253.9	972.64	3.4867	0.99976	0.00024447	0.00048895	0.029219	TRUE
BRUGEN66772	MFSD8	326.34/360.63/324.29	384.12/442.73/536.61	326.34	442.73	0.4389	590.13	1114.3	3.4867	0.99976	0.00024449	0.00048899	0.029219	TRUE
BRUGEN60997	NEURL2	549.94/492.06/464	666.62/549.29/636.33	492.06	636.33	0.37028	2068.8	1712.4	3.4865	0.99976	0.00024474	0.00048947	0.029225	TRUE
BRUGEN45575	SHROOM4	154.1/155.61/146.85	232.71/195.69/255.48	154.1	232.71	0.59148	27.45	508.45	3.486	0.99975	0.00024516	0.00049032	0.029253	TRUE
BRUGEN28788	SCGB1D2	292.09/302.8/361	414.61/341.98/451.13	302.8	414.61	0.45208	1750.9	1030.4	3.483	0.99975	0.0002479	0.00049579	0.029557	TRUE
BRUGEN39323	CYB5R2	120.87/90.421/124.41	190.03/124.97/209.89	120.87	190.03	0.6485	469.74	394.42	3.4825	0.99975	0.00024836	0.00049672	0.02959	TRUE
BRUGEN51296	THUMPD2	384.76/389.02/259.02	258.11/347.79/218.44	384.76	258.11	-0.5741	7913.3	1323.8	3.4807	0.00025003	0.99975	0.00050006	0.029766	FALSE
BRUGEN46877	ELOVL5	238.71/173.48/182.54	268.28/238.32/307.72	182.54	268.28	0.55298	1618.5	606.93	3.4801	0.99975	0.00025064	0.00050129	0.029803	TRUE
BRUGEN29469	YIF1A	155.11/139.84/104.02	214.42/169.53/237.44	139.84	214.42	0.61311	758.15	459.35	3.4798	0.99975	0.00025089	0.00050177	0.029803	TRUE
BRUGEN03311	CKS1B	220.58/190.3/146.85	149.38/102.69/89.276	190.3	102.69	-0.8836	1402.5	633.94	3.4798	0.00025092	0.99975	0.00050184	0.029803	FALSE
BRUGEN61201	XRRA1	366.63/358.53/373.24	513.18/443.7/490.07	366.63	490.07	0.41768	54.658	1258.6	3.4795	0.99975	0.00025116	0.00050233	0.029805	TRUE
BRUGEN04713	DFFA	335.4/377.45/258	453.22/366.2/530.91	335.4	453.22	0.43321	3879.4	1146.7	3.4793	0.99975	0.00025132	0.00050264	0.029805	TRUE
BRUGEN17842	SNAPC4	352.53/282.83/283.5	284.53/391.38/409.34	283.5	391.38	0.46384	2382.5	961.78	3.4787	0.99975	0.00025191	0.00050383	0.029852	TRUE
BRUGEN20834	ZNF215	170.22/167.17/148.89	248.97/179.22/258.33	167.17	248.97	0.5718	171.81	553.61	3.4763	0.99975	0.00025415	0.0005083	0.030094	TRUE
BRUGEN63402	CLEC14A	345.47/344.86/500.71	531.47/465.01/401.74	345.47	465.01	0.42761	12050	1182.7	3.4758	0.99975	0.0002547	0.00050941	0.030137	TRUE
BRUGEN27899	TUBB4A	146.05/132.48/178.46	241.85/191.82/222.24	146.05	222.24	0.60233	617.45	480.69	3.4753	0.99974	0.00025517	0.00051034	0.030169	TRUE
BRUGEN60811	ASB8	218.57/203.97/182.54	294.7/269.32/326.71	203.97	294.7	0.52869	336.13	681.63	3.475	0.99974	0.00025546	0.00051091	0.03018	TRUE
BRUGEN22848	TNFSF14	242.74/277.57/303.9	384.12/344.88/399.84	277.57	384.12	0.46727	953.12	940.75	3.4739	0.99974	0.00025644	0.00051288	0.030271	TRUE
BRUGEN13718	PFDN1	308.21/312.27/271.26	494.89/381.7/420.74	308.21	420.74	0.44777	690.73	1049.6	3.4733	0.99974	0.00025701	0.00051403	0.030271	TRUE
BRUGEN67133	AQP11	492.53/526.75/440.55	647.32/547.36/636.33	492.53	636.33	0.36891	1936.8	1714.1	3.4733	0.99974	0.00025703	0.00051405	0.030271	TRUE
BRUGEN26112	DNAJC6	265.9/248.13/302.88	375.99/370.07/308.67	265.9	370.07	0.47537	841.36	899.44	3.4733	0.99974	0.00025708	0.00051416	0.030271	TRUE
BRUGEN66930	ALS2CL	190.36/170.33/168.26	256.08/252.85/248.83	170.33	252.85	0.56722	202.85	564.54	3.4731	0.99974	0.00025721	0.00051442	0.030271	TRUE
BRUGEN28493	IFI44	177.27/161.92/167.24	223.56/248.97/265.93	167.24	248.97	0.57122	64.45	553.86	3.4728	0.99974	0.00025752	0.00051505	0.030273	TRUE
BRUGEN24421	SRSF11	231.66/214.49/226.39	322.13/341.01/264.03	226.39	322.13	0.50695	84.743	760.16	3.4726	0.99974	0.00025774	0.00051549	0.030273	TRUE
BRUGEN22129	PARG	74.534/72.547/56.088	131.09/83.314/125.37	72.547	125.37	0.78088	137.42	231.37	3.4725	0.99974	0.00025785	0.0005157	0.030273	TRUE
BRUGEN52718	SLC4A11	688.94/584.58/525.19	741.82/807.95/729.4	584.58	741.82	0.34315	7208.7	2050.7	3.4723	0.99974	0.000258	0.00051601	0.030273	TRUE
BRUGEN45069	LYRM4	265.9/274.42/218.23	194.09/161.78/114.92	265.9	161.78	-0.71336	1172.5	899.44	3.4718	0.00025854	0.99974	0.00051707	0.030312	FALSE
BRUGEN44761	PRDM10	143.02/209.23/164.18	261.16/245.1/187.1	164.18	245.1	0.57516	1238.4	543.27	3.4715	0.99974	0.00025879	0.00051759	0.03032	TRUE
BRUGEN60593	TAF1L	70.505/89.369/65.266	96.539/127.88/122.52	70.505	122.52	0.78859	191.65	224.57	3.4708	0.99974	0.0002595	0.00051899	0.030379	TRUE
BRUGEN10519	LBP	351.52/329.09/304.91	468.47/392.35/445.43	329.09	445.43	0.43558	543.73	1124.1	3.47	0.99974	0.00026027	0.00052054	0.030446	TRUE
BRUGEN30155	CIT	219.57/155.61/164.18	183.93/83.314/58.884	164.18	83.314	-0.97023	1570.7	543.27	3.4696	0.00026059	0.99974	0.00052118	0.030461	FALSE
BRUGEN77136	NonTargetingControl	1261/1061.9/1134	1441/1050.1/1356.2	1134	1356.2	0.25798	10667	4103.5	3.4693	0.99974	0.00026092	0.00052184	0.030477	TRUE
BRUGEN37469	SHANK1	232.67/197.66/175.4	328.23/286.76/271.63	197.66	286.76	0.53452	860.38	659.6	3.469	0.99974	0.00026124	0.00052248	0.030491	TRUE
BRUGEN13684	PEX10	508.64/443.69/432.39	344.49/283.85/307.72	443.69	307.72	-0.52652	2173.2	1536.7	3.4687	0.00026146	0.99974	0.00052293	0.030494	FALSE
BRUGEN02252	CAMK2A	347.49/318.58/306.95	432.9/352.63/450.18	318.58	432.9	0.4412	485.53	1086.6	3.4682	0.99974	0.00026197	0.00052394	0.03053	TRUE
BRUGEN58673	NRN1L	449.22/438.44/409.95	565/573.51/587.89	438.44	573.51	0.38669	463.77	1517.6	3.4674	0.99974	0.0002628	0.00052559	0.030568	TRUE
BRUGEN73600	CPLX3	469.36/494.16/349.79	271.32/329.38/337.16	469.36	329.38	-0.50964	7456.8	1629.8	3.4674	0.0002628	0.99974	0.00052561	0.030568	FALSE
BRUGEN07714	GRIA3	231.66/176.64/175.4	244.9/260.6/264.03	176.64	260.6	0.55844	1514.6	586.42	3.4673	0.99974	0.00026289	0.00052578	0.030568	TRUE
BRUGEN13382	PCBP2	290.08/258.65/262.08	412.58/365.23/357.1	262.08	365.23	0.47721	397.74	885.93	3.4653	0.99974	0.00026484	0.00052968	0.030772	TRUE
BRUGEN34505	LSM14A	209.5/156.66/151.95	232.71/235.41/242.18	156.66	235.41	0.58449	1407.2	517.27	3.4626	0.99973	0.00026747	0.00053494	0.031054	TRUE
BRUGEN57408	CCDC124	564.04/558.3/537.43	779.42/672.33/711.36	558.3	711.36	0.34899	234.28	1954.3	3.4624	0.99973	0.00026771	0.00053543	0.031059	TRUE
BRUGEN53901	GPR174	67.483/112.5/64.246	119.91/118.19/81.678	67.483	118.19	0.79944	1018.5	214.53	3.462	0.99973	0.00026813	0.00053626	0.031078	TRUE
BRUGEN71719	IZUMO1R	342.45/241.82/254.95	286.57/356.51/367.55	254.95	356.51	0.48214	3914.9	860.71	3.4618	0.99973	0.00026827	0.00053655	0.031078	TRUE
BRUGEN63127	RASEF	468.36/451.05/409.95	609.72/528.95/587.89	451.05	587.89	0.38151	994.29	1563.3	3.4609	0.99973	0.00026922	0.00053844	0.031158	TRUE
BRUGEN48326	MRPL34	223.6/187.15/186.62	293.68/232.5/273.53	187.15	273.53	0.54506	664.51	622.96	3.4607	0.99973	0.00026937	0.00053875	0.031158	TRUE
BRUGEN18317	SS18	143.02/118.81/134.61	207.3/186/224.14	134.61	207.3	0.61921	160.25	441.42	3.4599	0.99973	0.00027018	0.00054036	0.031228	TRUE
BRUGEN14058	PKNOX1	203.46/165.07/133.59	245.92/226.69/260.23	165.07	245.92	0.57225	1232.2	546.33	3.459	0.99973	0.00027113	0.00054227	0.031315	TRUE
BRUGEN12862	NRTN	332.38/301.75/292.68	412.58/413.66/370.4	301.75	412.58	0.45001	510.22	1026.6	3.4587	0.99973	0.00027135	0.0005427	0.031317	TRUE
BRUGEN44240	PPAN	128.92/111.45/114.22	180.88/188.91/140.56	114.22	180.88	0.65867	111.99	371.77	3.4576	0.99973	0.00027249	0.00054497	0.03141	TRUE
BRUGEN64382	IMMP1L	92.664/94.626/84.642	152.43/132.72/167.16	92.664	152.43	0.71201	34.101	298.79	3.4575	0.99973	0.00027256	0.00054512	0.03141	TRUE
BRUGEN29189	ZNF268	443.17/359.58/426.27	522.32/558.98/573.65	426.27	558.98	0.39023	2366.6	1473.6	3.4572	0.99973	0.00027293	0.00054587	0.031429	TRUE
BRUGEN35605	PDE7B	173.24/171.38/177.44	256.08/191.82/258.33	173.24	256.08	0.56114	10.559	574.64	3.4558	0.99973	0.00027436	0.00054872	0.03157	TRUE
BRUGEN35658	TJP3	281.01/250.23/215.17	350.59/273.19/351.41	250.23	350.59	0.48485	1088.3	844.08	3.4542	0.99972	0.00027601	0.00055203	0.031737	TRUE
BRUGEN35551	CACNG4	352.53/463.67/458.9	321.12/284.82/375.15	458.9	321.12	-0.51374	5669.4	1591.8	3.4534	0.00027675	0.99972	0.00055349	0.031797	FALSE
BRUGEN01989	C4B	337.42/397.43/356.92	393.27/482.45/477.72	356.92	477.72	0.41953	1010.7	1223.8	3.4531	0.99972	0.00027711	0.00055421	0.031815	TRUE
BRUGEN76012	RBM14-RBM4	610.37/622.43/540.48	765.2/771.14/770.24	610.37	770.24	0.33513	2514.9	2145.5	3.4515	0.99972	0.00027877	0.00055754	0.031979	TRUE
BRUGEN67303	OLFML1	133.96/127.22/141.75	206.29/235.41/197.55	133.96	206.29	0.61911	53.055	439.19	3.4513	0.99972	0.00027895	0.00055789	0.031979	TRUE
BRUGEN04211	CTNS	667.78/807.48/737.3	560.94/597.73/491.97	737.3	560.94	-0.3938	4878.7	2614.6	3.4491	0.00028127	0.99972	0.00056253	0.032194	FALSE
BRUGEN70202	IRF2BP2	231.66/173.48/177.44	261.16/239.29/273.53	177.44	261.16	0.555	1477.6	589.22	3.449	0.99972	0.00028133	0.00056266	0.032194	TRUE
BRUGEN04964	DOCK3	74.534/140.89/105.04	168.69/185.04/93.075	105.04	168.69	0.67831	1107.9	340.6	3.4489	0.99972	0.00028144	0.00056289	0.032194	TRUE
BRUGEN41252	ZSCAN2	502.6/399.53/465.02	347.54/326.48/279.22	465.02	326.48	-0.50901	2850.4	1614	3.4485	0.00028182	0.99972	0.00056365	0.032214	FALSE
BRUGEN25210	CHD1L	315.26/248.13/338.57	202.22/187.94/320.06	315.26	202.22	-0.63804	2524.7	1074.8	3.4479	0.00028244	0.99972	0.00056489	0.032239	FALSE
BRUGEN69870	TUBB2B	381.73/410.05/284.52	531.47/506.67/316.26	381.73	506.67	0.40754	5126.2	1312.9	3.4479	0.99972	0.00028246	0.00056492	0.032239	TRUE
BRUGEN60745	ZFP92	140/78.855/101.98	164.62/171.47/153.86	101.98	164.62	0.68557	990.27	330.24	3.4472	0.99972	0.00028316	0.00056633	0.032295	TRUE
BRUGEN11673	MOCS2	261.88/268.11/315.11	371.93/292.57/375.15	268.11	371.93	0.47071	1124.1	907.23	3.4468	0.99972	0.0002836	0.0005672	0.032321	TRUE
BRUGEN76283	C7orf55-LUC7L2	166.19/154.56/176.42	85.36/111.41/79.779	166.19	85.36	-0.95305	120.02	550.21	3.4459	0.00028454	0.99972	0.00056907	0.032404	FALSE
BRUGEN46594	PRUNE	322.31/277.57/213.13	214.42/145.32/171.9	277.57	171.9	-0.68807	3076.8	940.75	3.4451	0.00028543	0.99971	0.00057086	0.032482	FALSE
BRUGEN23135	GMPS	112.81/90.421/79.543	158.53/149.19/87.377	90.421	149.19	0.7162	309.76	291.24	3.4438	0.99971	0.00028685	0.0005737	0.03262	TRUE
BRUGEN42977	NPLOC4	119.86/145.09/107.08	174.79/187.94/191.85	119.86	187.94	0.64462	400.09	390.99	3.4432	0.99971	0.00028748	0.00057495	0.032662	TRUE
BRUGEN07059	GFAP	541.88/584.58/574.14	419.69/478.57/334.31	574.14	419.69	-0.45115	574.74	2012.4	3.4429	0.00028772	0.99971	0.00057545	0.032662	FALSE
BRUGEN49969	ZNF408	169.21/181.89/167.24	230.68/288.69/250.73	169.21	250.73	0.56456	82.337	560.67	3.4428	0.99971	0.00028787	0.00057573	0.032662	TRUE
BRUGEN31181	SBNO2	516.7/425.82/385.48	557.89/573.51/394.14	425.82	557.89	0.38895	4943.5	1472	3.4424	0.99971	0.00028824	0.00057648	0.032662	TRUE
BRUGEN50497	WLS	514.69/538.32/496.63	660.53/613.23/692.36	514.69	660.53	0.35931	442.19	1794.9	3.4424	0.99971	0.00028828	0.00057655	0.032662	TRUE
BRUGEN47171	CXorf56	292.09/298.6/313.07	201.21/188.91/180.45	298.6	188.91	-0.65771	125.92	1015.4	3.4422	0.00028849	0.99971	0.00057698	0.032662	FALSE
BRUGEN08818	HPX	367.63/267.06/298.8	408.51/356.51/426.44	298.8	408.51	0.44992	2873	1016.1	3.4418	0.99971	0.00028888	0.00057777	0.032683	TRUE
BRUGEN66722	HMCN2	382.74/360.63/359.98	481.68/409.79/501.47	360.63	481.68	0.41654	244.64	1237.1	3.4415	0.99971	0.00028924	0.00057848	0.032699	TRUE
BRUGEN74491	SSX2B	145.04/175.58/150.93	204.26/227.66/269.73	150.93	227.66	0.58983	321.31	497.5	3.4402	0.99971	0.00029061	0.00058122	0.032805	TRUE
BRUGEN43078	ARHGEF40	602.31/662.38/483.38	444.08/487.29/366.6	602.31	444.08	-0.43885	8877.3	2115.9	3.44	0.00029081	0.99971	0.00058161	0.032805	FALSE
BRUGEN29953	ADRM1	526.77/621.38/582.3	737.76/630.67/1141.6	582.3	737.76	0.34087	2305.1	2042.3	3.44	0.99971	0.00029081	0.00058162	0.032805	TRUE
BRUGEN03945	CRYBA1	324.32/285.98/372.22	176.82/276.1/209.89	324.32	209.89	-0.62536	1882.1	1107.1	3.4391	0.00029183	0.99971	0.00058365	0.032896	FALSE
BRUGEN44736	ATXN7L3	210.51/185.05/170.3	53.858/104.63/99.723	185.05	99.723	-0.88527	432.81	615.64	3.4388	0.00029216	0.99971	0.00058432	0.032909	FALSE
BRUGEN71683	OR5B2	387.78/320.68/331.43	447.13/397.2/512.86	331.43	447.13	0.43086	1645.4	1132.5	3.438	0.99971	0.00029302	0.00058605	0.032983	TRUE
BRUGEN33708	CFAP45	188.35/215.54/237.61	307.91/329.38/302.02	215.54	307.91	0.51256	613.18	722.09	3.4374	0.99971	0.00029364	0.00058729	0.033024	TRUE
BRUGEN62535	DTX3L	620.44/595.09/479.3	437.98/586.11/406.49	595.09	437.98	-0.44138	7025.8	2089.3	3.4373	0.00029382	0.99971	0.00058764	0.033024	FALSE
BRUGEN76903	NonTargetingControl	1175.4/1147.1/1201.3	951.16/1043.4/926.95	1175.4	951.16	-0.30513	736.51	4260.6	3.4357	0.00029549	0.9997	0.00059097	0.033188	FALSE
BRUGEN40793	PGPEP1	713.11/657.13/579.24	874.94/822.49/652.47	657.13	822.49	0.32338	4600.4	2317.8	3.4347	0.9997	0.00029661	0.00059322	0.033289	TRUE
BRUGEN56443	KCNG4	876.28/733.88/769.94	841.41/949.4/978.24	769.94	949.4	0.30192	6304.3	2735.9	3.431	0.9997	0.00030071	0.00060142	0.033725	TRUE
BRUGEN06752	GABRA5	657.71/701.29/738.32	530.45/553.17/515.71	701.29	530.45	-0.40211	1635.2	2481.1	3.4296	0.00030219	0.9997	0.00060439	0.033867	FALSE
BRUGEN50284	GGNBP2	261.88/290.19/256.99	201.21/159.85/151.01	261.88	159.85	-0.70869	412.73	885.19	3.4293	0.00030258	0.9997	0.00060516	0.033886	FALSE
BRUGEN25234	GTPBP1	167.2/178.74/158.07	279.45/240.26/247.88	167.2	247.88	0.56531	108.29	553.7	3.4289	0.9997	0.00030297	0.00060594	0.033905	TRUE
BRUGEN39172	SLC25A39	682.89/660.28/553.74	559.92/462.1/494.82	660.28	494.82	-0.41546	5931	2329.5	3.4283	0.00030369	0.9997	0.00060739	0.033961	FALSE
BRUGEN54565	MAEL	306.19/374.3/333.47	449.16/378.79/474.87	333.47	449.16	0.42856	1205.6	1139.8	3.4268	0.99969	0.00030541	0.00061082	0.034129	TRUE
BRUGEN73798	LIPK	19.137/53.622/34.673	70.118/41.657/76.929	34.673	70.118	0.99539	300.21	107.02	3.4263	0.99969	0.00030603	0.00061206	0.034173	TRUE
BRUGEN18973	TEK	108.78/115.65/127.47	188/182.13/113.02	115.65	182.13	0.65062	93.471	376.66	3.4251	0.99969	0.00030725	0.00061449	0.034284	TRUE
BRUGEN01178	ARNTL	158.13/174.53/157.05	241.85/236.38/171.9	158.13	236.38	0.57697	135.07	522.35	3.4236	0.99969	0.00030895	0.00061791	0.03445	TRUE
BRUGEN56625	PIGS	220.58/218.69/140.73	126.01/142.41/108.27	218.69	126.01	-0.79056	3040.8	733.15	3.423	0.00030966	0.99969	0.00061932	0.034504	FALSE
BRUGEN41672	SRBD1	219.57/213.43/149.91	121.94/176.32/115.87	213.43	121.94	-0.80254	2036.7	714.73	3.4222	0.00031054	0.99969	0.00062108	0.034572	FALSE
BRUGEN08901	HSF1	1039.4/1036.7/983.07	1240.8/1245.8/1499.6	1036.7	1245.8	0.26491	1441	3735.5	3.4221	0.99969	0.00031071	0.00062143	0.034572	TRUE
BRUGEN08985	DNAJB1	76.548/94.626/75.464	130.07/170.5/110.17	76.548	130.07	0.7572	163.99	244.72	3.4215	0.99969	0.00031136	0.00062272	0.034584	TRUE
BRUGEN60318	STXBP5	302.16/216.59/200.9	167.67/110.44/124.42	216.59	124.42	-0.79488	3784.7	725.78	3.4214	0.00031153	0.99969	0.00062306	0.034584	FALSE
BRUGEN39431	ERAP1	672.82/719.16/664.9	891.2/791.49/839.57	672.82	839.57	0.31901	1105.1	2375.8	3.4212	0.99969	0.00031176	0.00062351	0.034584	TRUE
BRUGEN14002	PI4KB	573.11/598.25/520.09	354.65/441.76/419.79	573.11	419.79	-0.44823	1721.5	2008.6	3.421	0.00031201	0.99969	0.00062402	0.034584	FALSE
BRUGEN53613	DOT1L	194.39/157.71/202.94	281.49/282.88/260.23	194.39	281.49	0.53181	709.28	648.19	3.4209	0.99969	0.00031211	0.00062422	0.034584	TRUE
BRUGEN09927	JUP	402.89/401.64/504.79	275.39/338.1/212.74	402.89	275.39	-0.54725	5193.2	1389.1	3.4208	0.00031217	0.99969	0.00062433	0.034584	FALSE
BRUGEN30922	PUF60	228.64/168.22/184.58	274.37/269.32/236.49	184.58	269.32	0.54261	1104.3	614.02	3.4197	0.99969	0.00031348	0.00062697	0.034705	TRUE
BRUGEN09821	ITGB6	128.92/156.66/133.59	174.79/218.94/205.14	133.59	205.14	0.61507	276.95	437.93	3.4192	0.99969	0.00031398	0.00062796	0.034735	TRUE
BRUGEN23749	SYT7	183.31/150.35/159.09	172.75/279.01/237.44	159.09	237.44	0.57476	331.63	525.65	3.4174	0.99968	0.00031614	0.00063227	0.034949	TRUE
BRUGEN47436	NOD2	82.592/95.678/77.503	138.2/131.75/159.56	82.592	138.2	0.73576	98.568	264.94	3.4165	0.99968	0.00031712	0.00063423	0.035033	TRUE
BRUGEN07354	GNB3	463.32/425.82/393.64	556.88/535.73/620.18	425.82	556.88	0.38632	1221	1472	3.416	0.99968	0.00031779	0.00063558	0.035082	TRUE
BRUGEN40688	NXPE4	100.72/160.86/110.14	131.09/184.07/174.75	110.14	174.75	0.66122	1331	357.9	3.4156	0.99968	0.00031826	0.00063652	0.035109	TRUE
BRUGEN49376	FAM118B	284.03/386.92/319.19	431.88/387.51/456.83	319.19	431.88	0.43504	2911.3	1088.8	3.4152	0.99968	0.00031865	0.00063729	0.035126	TRUE
BRUGEN58820	LSM12	275.98/236.57/215.17	140.24/159.85/62.683	236.57	140.24	-0.75023	1005.4	795.92	3.4145	0.00031947	0.99968	0.00063894	0.035144	FALSE
BRUGEN65279	OR8J1	226.62/169.28/198.86	236.77/288.69/286.82	198.86	286.82	0.52621	823	663.77	3.4143	0.99968	0.00031971	0.00063941	0.035144	TRUE
BRUGEN04129	CST3	800.74/686.57/710.79	882.06/858.33/941.2	710.79	882.06	0.31106	4338.6	2516.3	3.4143	0.99968	0.00031974	0.00063948	0.035144	TRUE
BRUGEN60621	OR13C3	421.02/519.39/404.85	513.18/551.23/578.39	421.02	551.23	0.38797	4969.7	1454.6	3.4142	0.99968	0.00031985	0.00063969	0.035144	TRUE
BRUGEN67995	KRTAP13-4	400.87/344.86/381.4	505.05/441.76/510.96	381.4	505.05	0.4042	857.12	1311.7	3.4141	0.99968	0.00031994	0.00063988	0.035144	TRUE
BRUGEN09791	ITGAV	677.86/584.58/563.94	656.46/739.17/829.13	584.58	739.17	0.33799	4563.2	2050.7	3.4138	0.99968	0.00032036	0.00064072	0.035165	TRUE
BRUGEN40506	KLHDC4	424.04/403.74/385.48	276.41/262.54/300.12	403.74	276.41	-0.545	372.75	1392.2	3.4127	0.00032166	0.99968	0.00064332	0.035277	FALSE
BRUGEN39141	DPH5	173.24/129.32/151.95	97.555/75.564/54.135	151.95	75.564	-0.9983	482.65	501.01	3.4125	0.00032183	0.99968	0.00064366	0.035277	FALSE
BRUGEN07518	NPBWR2	565.05/606.66/628.19	764.18/836.05/675.27	606.66	764.18	0.33253	1097.5	2131.8	3.4116	0.99968	0.00032293	0.00064586	0.035372	TRUE
BRUGEN35034	PPP1R14B	735.27/623.48/693.45	892.22/846.71/862.37	693.45	862.37	0.3141	3322.1	2452.1	3.4112	0.99968	0.00032342	0.00064684	0.035401	TRUE
BRUGEN38699	PPME1	293.1/282.83/228.43	454.24/388.48/360.9	282.83	388.48	0.45652	1532.2	959.39	3.4109	0.99968	0.00032375	0.0006475	0.035412	TRUE
BRUGEN49333	RNF128	348.5/298.6/378.34	478.63/461.13/466.32	348.5	466.32	0.41915	1690.2	1193.6	3.4106	0.99968	0.00032415	0.0006483	0.03543	TRUE
BRUGEN05393	EGR1	760.45/691.82/676.12	980.63/774.05/860.47	691.82	860.47	0.31431	2478	2446.1	3.4099	0.99968	0.00032495	0.0006499	0.035493	TRUE
BRUGEN29786	SDS	162.16/114.6/95.86	211.37/155.97/180.45	114.6	180.45	0.6504	1306.6	373.09	3.4091	0.99967	0.00032587	0.00065174	0.035568	TRUE
BRUGEN11370	MEOX2	269.93/331.19/262.08	406.48/372.98/293.47	269.93	372.98	0.46501	1907.1	913.7	3.4089	0.99967	0.0003261	0.00065219	0.035568	TRUE
BRUGEN68242	KIF4B	411.95/340.65/347.75	477.61/427.23/465.37	347.75	465.37	0.41931	2086.3	1190.9	3.4086	0.99967	0.00032644	0.00065288	0.03558	TRUE
BRUGEN55645	TCEAL8	191.37/191.36/202.94	277.42/248.01/306.77	191.37	277.42	0.53338	66.884	637.66	3.4077	0.99967	0.00032758	0.00065516	0.035679	TRUE
BRUGEN52438	ATG10	714.12/660.28/758.72	918.64/885.46/754.1	714.12	885.46	0.30987	2443.7	2528.6	3.4074	0.99967	0.00032796	0.00065593	0.035696	TRUE
BRUGEN06840	GALNS	638.57/550.94/567	706.26/718.83/819.63	567	718.83	0.34176	2690.5	1986.2	3.4068	0.99967	0.00032869	0.00065738	0.03575	TRUE
BRUGEN13699	PEX14	685.91/752.81/664.9	518.26/636.48/495.77	685.91	518.26	-0.40367	2458.1	2424.2	3.4051	0.0003307	0.99967	0.00066141	0.035944	FALSE
BRUGEN07412	GOLGA2	601.31/676.05/811.75	842.43/848.64/718.01	676.05	842.43	0.31699	12000	2387.7	3.4048	0.99967	0.00033105	0.0006621	0.035956	TRUE
BRUGEN19514	TPO	857.14/833.76/788.29	794.67/648.11/565.1	833.76	648.11	-0.36291	1307.1	2973.8	3.4045	0.00033141	0.99967	0.00066282	0.03597	FALSE
BRUGEN49166	OR51B4	233.67/276.52/242.71	342.46/340.04/304.87	242.71	340.04	0.48478	612.4	817.55	3.404	0.99967	0.00033201	0.00066403	0.036011	TRUE
BRUGEN48094	IQCH	49.354/87.267/59.147	105.68/126.91/105.42	59.147	105.68	0.82678	443.3	186.93	3.4038	0.99967	0.00033229	0.00066458	0.036015	TRUE
BRUGEN57822	HSPA12B	313.24/326.99/349.79	490.82/405.91/440.68	326.99	440.68	0.42937	354.32	1116.6	3.4024	0.99967	0.00033395	0.00066789	0.036153	TRUE
BRUGEN29094	NES	148.06/101.99/107.08	205.27/170.5/112.07	107.08	170.5	0.66618	852.78	347.52	3.4024	0.99967	0.00033402	0.00066805	0.036153	TRUE
BRUGEN24704	NMT2	38.274/31.542/20.396	65.037/82.345/43.688	31.542	65.037	1.021	84.782	96.95	3.4017	0.99966	0.00033504	0.00067009	0.036213	TRUE
BRUGEN29769	METAP2	246.77/221.85/138.69	129.06/134.66/113.02	221.85	129.06	-0.77691	3768	744.21	3.4013	0.00033527	0.99966	0.00067055	0.036213	FALSE
BRUGEN03007	CEBPB	966.93/946.26/1029	1039.6/1167.4/1229	966.93	1167.4	0.27153	2137.6	3472.8	3.4013	0.99966	0.00033528	0.00067057	0.036213	TRUE
BRUGEN32641	AHCYL2	601.31/544.63/527.23	693.05/665.55/864.27	544.63	693.05	0.34712	1757.7	1904.3	3.4011	0.99966	0.00033553	0.00067107	0.036215	TRUE
BRUGEN36533	BRD7	158.13/119.86/113.2	164.62/201.5/187.1	119.86	187.1	0.63816	754.61	390.99	3.4005	0.99966	0.00033632	0.00067263	0.036254	TRUE
BRUGEN56835	TUBA3E	651.67/634/604.73	794.67/814.74/621.13	634	794.67	0.32541	584.38	2232.5	3.4005	0.99966	0.00033637	0.00067274	0.036254	TRUE
BRUGEN04351	CYP2A7	358.57/318.58/327.35	441.03/395.26/455.88	327.35	441.03	0.42891	525.79	1117.9	3.4	0.99966	0.00033696	0.00067392	0.036271	TRUE
BRUGEN68728	TAS2R60	137.99/134.58/139.71	210.35/205.38/258.33	137.99	210.35	0.60469	7.292	453	3.4	0.99966	0.00033699	0.00067398	0.036271	TRUE
BRUGEN57867	ARAP1	77.556/74.65/101.98	131.09/108.5/165.26	77.556	131.09	0.74973	302.46	248.09	3.3988	0.99966	0.00033841	0.00067681	0.036398	TRUE
BRUGEN07711	GRIA2	153.1/116.71/118.29	196.13/185.04/110.17	118.29	185.04	0.64104	606.85	385.66	3.3985	0.99966	0.00033876	0.00067753	0.036404	TRUE
BRUGEN27263	TENM1	291.09/240.77/307.97	310.96/414.63/397.94	291.09	397.94	0.44979	1408.4	988.71	3.3984	0.99966	0.00033894	0.00067787	0.036404	TRUE
BRUGEN22446	STC2	169.21/152.45/128.49	228.64/231.54/207.99	152.45	228.64	0.5816	427.49	502.76	3.398	0.99966	0.00033942	0.00067884	0.03642	TRUE
BRUGEN53404	DDI2	788.65/731.78/659.8	747.92/904.83/914.6	731.78	904.83	0.30587	4207.6	2594.1	3.3977	0.99966	0.00033974	0.00067949	0.03642	TRUE
BRUGEN53201	MRI1	477.42/446.85/496.63	615.81/736.27/540.4	477.42	615.81	0.36656	651.95	1659.1	3.3977	0.99966	0.00033979	0.00067958	0.03642	TRUE
BRUGEN50894	FBXO11	318.28/243.93/264.12	363.8/389.45/365.65	264.12	365.65	0.46775	1670.4	893.14	3.3972	0.99966	0.00034034	0.00068068	0.036454	TRUE
BRUGEN01315	ATM	666.78/636.1/579.24	772.31/813.77/796.84	636.1	796.84	0.32457	2087.2	2240.2	3.396	0.99966	0.0003419	0.00068379	0.036579	TRUE
BRUGEN63023	FBXO16	1122/1069.3/841.32	1079.2/858.33/802.53	1069.3	858.33	-0.3167	27374	3858.6	3.3959	0.00034198	0.99966	0.00068397	0.036579	FALSE
BRUGEN20630	ZNF90	36.26/56.776/38.752	59.956/82.345/75.98	38.752	75.98	0.95346	165.54	120.19	3.3957	0.99966	0.00034238	0.00068475	0.036596	TRUE
BRUGEN16142	RHO	213.53/188.2/167.24	276.41/273.19/228.89	188.2	273.19	0.53527	540.36	626.62	3.3953	0.99966	0.00034279	0.00068558	0.036615	TRUE
BRUGEN04194	CTH	114.82/159.81/170.3	237.79/172.44/284.92	159.81	237.79	0.57035	1067.1	528.16	3.393	0.99965	0.00034568	0.00069136	0.036899	TRUE
BRUGEN69393	PKD1L3	452.24/399.53/397.72	525.37/683.95/368.5	399.53	525.37	0.39416	1390.6	1377	3.3911	0.99965	0.000348	0.000696	0.037121	TRUE
BRUGEN22052	RAE1	38.274/22.079/46.91	75.198/53.282/93.075	38.274	75.198	0.95618	168.42	118.65	3.3899	0.99965	0.00034972	0.00069945	0.03723	TRUE
BRUGEN05593	ENO2	304.18/357.48/278.4	195.11/216.04/187.1	304.18	195.11	-0.638	1752.6	1035.3	3.3898	0.00034972	0.99965	0.00069944	0.03723	FALSE
BRUGEN04755	DHPS	363.6/218.69/153.99	243.89/126.91/124.42	218.69	126.91	-0.78037	12593	733.15	3.3897	0.00034979	0.99965	0.00069957	0.03723	FALSE
BRUGEN72144	TRIM49D1	304.18/259.7/291.66	398.35/380.73/407.44	291.66	398.35	0.44844	589.14	990.75	3.3896	0.99965	0.00034999	0.00069998	0.03723	TRUE
BRUGEN75977	TGFBR3L	869.23/680.26/748.52	837.35/963.93/923.15	748.52	923.15	0.30216	9614.9	2656.3	3.3883	0.99965	0.0003516	0.00070319	0.037375	TRUE
BRUGEN05246	ECH1	655.7/771.73/628.19	863.77/818.61/787.34	655.7	818.61	0.31971	7110.3	2312.5	3.3878	0.99965	0.00035231	0.00070461	0.037425	TRUE
BRUGEN12849	NRF1	63.455/34.696/21.415	65.037/69.751/78.829	34.696	69.751	0.98698	501.71	107.09	3.3874	0.99965	0.00035289	0.00070578	0.037439	TRUE
BRUGEN14579	PPP1R2	188.35/146.15/189.68	95.522/167.6/103.52	188.35	103.52	-0.85724	891.48	627.14	3.3873	0.00035292	0.99965	0.00070584	0.037439	FALSE
BRUGEN68899	LRRC30	481.45/474.18/497.65	518.26/620.01/649.63	481.45	620.01	0.36425	157.69	1673.8	3.3869	0.99965	0.0003534	0.00070681	0.037465	TRUE
BRUGEN74171	SPATA31A1	272.96/253.39/405.87	346.52/375.88/408.39	272.96	375.88	0.46018	9025	924.4	3.3853	0.99964	0.00035545	0.00071089	0.037655	TRUE
BRUGEN71610	OR56A3	147.05/123.01/227.41	221.53/245.1/212.74	147.05	221.53	0.58789	3517.6	484.16	3.3848	0.99964	0.00035617	0.00071234	0.037706	TRUE
BRUGEN53483	SARNP	173.24/239.72/135.63	101.62/83.314/92.125	173.24	92.125	-0.90384	2917	574.64	3.3838	0.00035742	0.99964	0.00071483	0.037812	FALSE
BRUGEN30476	PROSC	313.24/235.51/292.68	170.72/186/213.69	292.68	186	-0.65116	1845.3	994.37	3.3829	0.00035869	0.99964	0.00071738	0.037921	FALSE
BRUGEN07357	GNG3	328.35/340.65/314.09	470.5/404.95/441.63	328.35	441.63	0.42647	177.34	1121.5	3.3826	0.99964	0.00035901	0.00071802	0.037926	TRUE
BRUGEN30668	USP18	237.7/262.85/201.92	336.36/304.19/333.36	237.7	333.36	0.48619	956.53	799.92	3.3822	0.99964	0.00035958	0.00071916	0.037926	TRUE
BRUGEN18363	STAT5B	236.7/202.92/238.63	141.25/124.97/171.9	236.7	141.25	-0.74067	572.23	796.38	3.3821	0.00035963	0.99964	0.00071926	0.037926	FALSE
BRUGEN61043	FAM65C	230.65/255.49/180.5	375.99/269.32/324.81	230.65	324.81	0.49208	1566	775.13	3.3821	0.99964	0.00035972	0.00071944	0.037926	TRUE
BRUGEN68700	NLRP10	603.32/498.37/474.2	639.19/639.39/531.86	498.37	639.19	0.3584	5799.9	1735.3	3.3805	0.99964	0.00036181	0.00072361	0.038121	TRUE
BRUGEN24338	MAPKAPK2	661.74/694.98/775.03	527.41/529.92/421.69	694.98	527.41	-0.3974	3756.9	2457.7	3.3801	0.00036224	0.99964	0.00072449	0.038141	FALSE
BRUGEN63138	TTC16	735.27/672.9/677.14	842.43/775.02/944.05	677.14	842.43	0.31469	1698.6	2391.7	3.3798	0.99964	0.00036267	0.00072533	0.038159	TRUE
BRUGEN01521	AVP	575.12/520.44/528.25	619.88/709.14/673.37	528.25	673.37	0.3496	1129	1844.4	3.3792	0.99964	0.00036355	0.0007271	0.038206	TRUE
BRUGEN42092	TYW1	516.7/496.26/519.07	369.9/383.63/373.25	516.7	373.25	-0.46812	211.67	1802.2	3.3791	0.0003636	0.99964	0.0007272	0.038206	FALSE
BRUGEN38019	CYB5R4	398.86/332.24/422.19	532.49/524.1/497.67	398.86	524.1	0.39312	2490.9	1374.6	3.3782	0.99964	0.00036483	0.00072967	0.038306	TRUE
BRUGEN41807	INTS10	186.33/169.28/140.73	111.78/73.627/89.276	169.28	89.276	-0.91546	552.94	560.9	3.3779	0.00036518	0.99963	0.00073037	0.038306	FALSE
BRUGEN27159	SUGP2	135.97/151.4/126.45	188/207.32/331.46	135.97	207.32	0.60488	164.34	446.09	3.3778	0.99963	0.0003653	0.0007306	0.038306	TRUE
BRUGEN12428	NEFH	292.09/223.95/234.55	289.62/329.38/340.01	234.55	329.38	0.4881	1711.8	788.83	3.3765	0.99963	0.00036711	0.00073422	0.03847	TRUE
BRUGEN26369	KLHL21	674.83/668.69/676.12	562.97/503.76/510.01	674.83	510.01	-0.40331	19.679	2383.2	3.3762	0.00036744	0.99963	0.00073488	0.038479	FALSE
BRUGEN57906	SCGB3A2	521.74/580.37/601.67	732.68/612.26/761.7	580.37	732.68	0.33568	1946	2035.3	3.3759	0.99963	0.00036781	0.00073562	0.038491	TRUE
BRUGEN71828	OR4F6	159.14/208.18/168.26	247.95/217/260.23	168.26	247.95	0.55659	838.18	557.39	3.3753	0.99963	0.00036868	0.00073737	0.03854	TRUE
BRUGEN53204	MED10	162.16/167.17/165.2	214.42/244.13/246.93	165.2	244.13	0.56059	6.5677	546.8	3.3752	0.99963	0.00036878	0.00073755	0.03854	TRUE
BRUGEN48893	WDR77	357.56/304.91/286.56	413.59/460.17/364.7	304.91	413.59	0.4386	1554.6	1037.9	3.3736	0.99963	0.00037093	0.00074186	0.038732	TRUE
BRUGEN42455	TMEM63B	395.84/486.8/404.85	566.02/527.98/530.91	404.85	530.91	0.39022	3398.3	1396.2	3.3735	0.99963	0.00037111	0.00074223	0.038732	TRUE
BRUGEN54978	CIPC	333.39/367.99/355.9	359.73/473.73/533.76	355.9	473.73	0.41157	326.53	1220.1	3.3731	0.99963	0.00037157	0.00074315	0.038754	TRUE
BRUGEN45913	FAM135A	664.76/629.79/638.38	819.05/798.27/724.66	638.38	798.27	0.322	384.82	2248.7	3.3716	0.99963	0.00037361	0.00074722	0.038941	TRUE
BRUGEN00600	ALDH1A1	829.95/837.97/795.43	927.79/1013.3/1097	829.95	1013.3	0.28771	627.83	2959.5	3.371	0.99963	0.00037444	0.00074888	0.03898	TRUE
BRUGEN38449	REEP2	173.24/189.25/172.34	254.05/224.75/295.37	173.24	254.05	0.54969	128.59	574.64	3.371	0.99963	0.0003745	0.00074899	0.03898	TRUE
BRUGEN60926	BRI3BP	553.97/566.71/605.75	650.37/716.89/756	566.71	716.89	0.33862	843.35	1985.1	3.3708	0.99963	0.00037481	0.00074962	0.038987	TRUE
BRUGEN23647	PKD2L1	400.87/393.23/435.45	583.3/503.76/526.16	400.87	526.16	0.3915	626.96	1381.9	3.3703	0.99962	0.00037537	0.00075074	0.039019	TRUE
BRUGEN31815	GPATCH8	177.27/162.97/206	95.522/159.85/91.175	177.27	95.522	-0.88513	514.87	588.62	3.3694	0.00037661	0.99962	0.00075321	0.039121	FALSE
BRUGEN33678	CBY1	805.77/792.76/753.62	1014.2/971.68/930.75	792.76	971.68	0.29326	850.62	2820.8	3.3687	0.99962	0.00037758	0.00075517	0.039196	TRUE
BRUGEN53593	MSANTD4	169.21/174.53/141.75	248.97/222.82/269.73	169.21	248.97	0.55441	391.25	560.67	3.3683	0.99962	0.0003782	0.0007564	0.039233	TRUE
BRUGEN02899	CDK2	213.53/219.74/145.83	130.07/123.03/123.47	213.53	123.47	-0.78542	2311	715.06	3.368	0.00037855	0.99962	0.0007571	0.039233	FALSE
BRUGEN08701	HOXB7	523.75/477.34/549.66	402.41/379.76/364.7	523.75	379.76	-0.46276	1412.8	1828	3.3679	0.00037869	0.99962	0.00075739	0.039233	FALSE
BRUGEN02648	SIGLEC6	132.95/125.12/171.32	185.96/204.41/203.25	132.95	203.25	0.60858	766.86	435.74	3.3674	0.99962	0.00037935	0.00075869	0.039274	TRUE
BRUGEN66543	CALHM1	1006.2/889.49/978.99	1024.3/1207.1/1178.6	978.99	1178.6	0.2675	4375.8	3518.2	3.3658	0.99962	0.00038155	0.00076309	0.039475	TRUE
BRUGEN66719	OR4S1	630.52/547.78/529.27	695.08/655.86/718.01	547.78	695.08	0.34302	3594	1915.8	3.3652	0.99962	0.00038238	0.00076476	0.039535	TRUE
BRUGEN42393	STRBP	205.47/145.09/169.28	248.97/169.53/256.43	169.28	248.97	0.5538	947.37	560.92	3.3645	0.99962	0.00038341	0.00076683	0.039616	TRUE
BRUGEN75447	KRTAP4-7	366.63/328.04/307.97	215.43/242.19/191.85	328.04	215.43	-0.60433	945.81	1120.4	3.3641	0.00038391	0.99962	0.00076782	0.03964	FALSE
BRUGEN71734	OR6M1	257.85/261.8/290.64	397.33/312.91/361.85	261.8	361.85	0.46542	423.64	884.92	3.3634	0.99962	0.00038494	0.00076989	0.039721	TRUE
BRUGEN14753	PRIM1	57.411/18.925/23.455	51.826/64.908/32.291	23.455	51.826	1.1111	586.77	71.163	3.3632	0.99961	0.00038634	0.00077268	0.039812	TRUE
BRUGEN46608	ZNF250	275.98/212.38/221.29	350.59/312.91/297.27	221.29	312.91	0.4979	1534.9	742.27	3.3629	0.99961	0.00038567	0.00077135	0.03977	TRUE
BRUGEN70325	EFCAB5	810.81/705.49/801.55	675.77/621.95/599.29	801.55	621.95	-0.36547	4656.3	2853.6	3.3621	0.00038681	0.99961	0.00077362	0.039834	FALSE
BRUGEN08583	HNRNPAB	347.49/308.06/323.27	434.93/436.92/398.89	323.27	434.93	0.4269	408.93	1103.3	3.3616	0.99961	0.00038747	0.00077494	0.039875	TRUE
BRUGEN10891	CD180	332.38/299.65/294.72	320.1/406.88/421.69	299.65	406.88	0.44007	547.82	1019.2	3.359	0.99961	0.00039114	0.00078227	0.040168	TRUE
BRUGEN67287	RCOR2	296.12/350.12/285.54	465.42/332.29/402.69	296.12	402.69	0.4422	1513.8	1006.6	3.359	0.99961	0.00039117	0.00078234	0.040168	TRUE
BRUGEN52806	DTNBP1	182.31/151.4/181.52	224.58/293.54/264.03	181.52	264.03	0.53809	453.89	603.38	3.3589	0.99961	0.00039126	0.00078252	0.040168	TRUE
BRUGEN76651	NonTargetingControl	1516.9/1583.4/1652	1327.2/1648.8/1250.8	1583.4	1327.2	-0.25453	4569.6	5820.9	3.3588	0.00039135	0.99961	0.0007827	0.040168	FALSE
BRUGEN44424	GPR137	202.45/207.13/207.02	288.6/304.19/295.37	207.02	295.37	0.51071	10.428	692.27	3.3581	0.99961	0.0003924	0.0007848	0.04022	TRUE
BRUGEN06696	G6PC	249.79/222.9/206	170.72/116.25/131.06	222.9	131.06	-0.76159	504.41	747.9	3.358	0.00039258	0.99961	0.00078516	0.04022	FALSE
BRUGEN58265	DNAJC24	868.22/850.59/814.81	699.14/665.55/654.37	850.59	665.55	-0.35345	795.57	3036.6	3.3579	0.00039264	0.99961	0.00078527	0.04022	FALSE
BRUGEN73987	CCNI2	360.58/397.43/323.27	518.26/355.54/478.67	360.58	478.67	0.40772	1375	1236.9	3.3577	0.99961	0.00039301	0.00078602	0.040231	TRUE
BRUGEN06623	NR5A1	1580.3/1507.7/1414.4	1741.8/1757.3/1843.5	1507.7	1757.3	0.2209	6986	5529.8	3.357	0.99961	0.00039393	0.00078785	0.040298	TRUE
BRUGEN47608	ZSCAN31	111.8/132.48/111.16	175.8/144.35/203.25	111.8	175.8	0.64836	213.96	363.56	3.3566	0.99961	0.00039452	0.00078905	0.040333	TRUE
BRUGEN73414	RBMXL1	264.9/353.27/340.61	196.13/275.13/226.04	340.61	226.04	-0.5894	2946.2	1165.3	3.3562	0.00039518	0.9996	0.00079036	0.040373	FALSE
BRUGEN24890	HOMER1	594.26/561.45/510.91	661.54/710.11/721.81	561.45	710.11	0.33835	1815.2	1965.9	3.3529	0.9996	0.00039992	0.00079983	0.04083	TRUE
BRUGEN75857	PPP5D1	133.96/132.48/151.95	182.92/216.04/204.2	133.96	204.2	0.60447	162.88	439.19	3.3514	0.9996	0.00040196	0.00080392	0.041012	TRUE
BRUGEN39328	NLK	402.89/396.38/320.21	266.24/278.04/272.58	396.38	272.58	-0.53857	2921.9	1365.7	3.3501	0.0004039	0.9996	0.0008078	0.041138	FALSE
BRUGEN37574	PAM16	234.68/236.57/152.97	133.12/186.97/140.56	234.68	140.56	-0.7354	3340.3	789.29	3.3501	0.00040391	0.9996	0.00080782	0.041138	FALSE
BRUGEN55458	MCFD2	1550.1/1562.4/1466.4	1263.1/1373.7/1297.4	1550.1	1297.4	-0.25661	3574.7	5692.7	3.3499	0.00040415	0.9996	0.0008083	0.041138	FALSE
BRUGEN13166	OXT	1267.1/1487.7/1895.8	1138.1/1524.8/1240.4	1487.7	1240.4	-0.26216	107590	5453	3.3499	0.00040426	0.9996	0.00080851	0.041138	FALSE
BRUGEN35214	TBL2	748.36/761.22/789.31	668.66/587.07/384.65	761.22	587.07	-0.3742	477.3	2703.5	3.3492	0.00040522	0.99959	0.00081043	0.041165	FALSE
BRUGEN34564	CHTOP	226.62/209.23/170.3	148.36/93.971/120.62	209.23	120.62	-0.78961	908.88	700.01	3.3492	0.00040524	0.99959	0.00081048	0.041165	FALSE
BRUGEN21443	AKAP17A	196.41/175.58/141.75	229.66/262.54/256.43	175.58	256.43	0.54383	789.18	582.77	3.349	0.99959	0.00040553	0.00081106	0.041165	TRUE
BRUGEN56911	KTI12	190.36/137.73/117.27	263.19/189.88/208.94	137.73	208.94	0.59768	1594.2	452.13	3.349	0.99959	0.00040559	0.00081118	0.041165	TRUE
BRUGEN27982	WFDC2	122.88/124.07/111.16	209.34/147.25/189.95	122.88	189.95	0.62424	69.428	401.29	3.348	0.99959	0.00040695	0.0008139	0.041276	TRUE
BRUGEN08986	DNAJB1	273.96/220.79/252.91	344.49/350.69/369.45	252.91	350.69	0.47003	737.25	853.51	3.3472	0.99959	0.00040811	0.00081621	0.041367	TRUE
BRUGEN59250	IFFO2	224.61/252.34/160.11	174.79/132.72/130.12	224.61	132.72	-0.75459	2464.7	753.9	3.3466	0.00040911	0.99959	0.00081821	0.041441	FALSE
BRUGEN56915	RPUSD1	246.77/268.11/286.56	368.88/324.54/378	268.11	368.88	0.45887	397.92	907.23	3.3456	0.99959	0.0004105	0.00082099	0.041515	TRUE
BRUGEN43030	TRMU	110.79/114.6/158.07	132.11/179.22/223.19	114.6	179.22	0.6406	951.78	373.09	3.3455	0.99959	0.00041069	0.00082138	0.041515	TRUE
BRUGEN17398	SKI	121.87/187.15/191.72	103.65/78.47/120.62	187.15	103.65	-0.84628	2141	622.96	3.3454	0.00041085	0.99959	0.0008217	0.041515	FALSE
BRUGEN57702	ABHD15	185.33/209.23/193.76	108.73/252.85/90.226	193.76	108.73	-0.82769	155.21	645.98	3.3453	0.00041091	0.99959	0.00082181	0.041515	FALSE
BRUGEN33335	BACE1	622.46/516.24/472.16	725.56/569.64/658.17	516.24	658.17	0.34983	6612.8	1800.5	3.3449	0.99959	0.00041153	0.00082306	0.041548	TRUE
BRUGEN56240	MRRF	128.92/134.58/125.43	161.58/197.63/202.3	128.92	197.63	0.61241	22.087	421.94	3.3448	0.99959	0.00041177	0.00082354	0.041548	TRUE
BRUGEN72243	VMAC	193.39/198.72/212.11	307.91/284.82/245.03	198.72	284.82	0.51715	103.98	663.27	3.3433	0.99959	0.00041395	0.0008279	0.041741	TRUE
BRUGEN76450	NonTargetingControl	1935.9/1944/1825.4	1532.4/1882.3/1652.6	1935.9	1652.6	-0.22815	6133.8	7184.8	3.3424	0.00041532	0.99958	0.00083063	0.041851	FALSE
BRUGEN20224	EIF4H	236.7/218.69/280.44	188/142.41/123.47	236.7	142.41	-0.72898	1118.9	796.38	3.3411	0.00041724	0.99958	0.00083449	0.042018	FALSE
BRUGEN41059	SOHLH2	82.592/56.776/65.266	77.231/113.35/149.11	65.266	113.35	0.78707	186.13	207.17	3.3404	0.99958	0.00041826	0.00083652	0.042093	TRUE
BRUGEN52964	ZNRF3	472.38/527.8/405.87	371.93/337.13/333.36	472.38	337.13	-0.48542	3747.6	1640.8	3.339	0.00042041	0.99958	0.00084081	0.042281	FALSE
BRUGEN23900	ATP6V0D1	94.678/92.524/48.95	72.15/34.876/18.045	92.524	34.876	-1.3823	951.67	298.32	3.3377	0.00042238	0.99958	0.00084476	0.042452	FALSE
BRUGEN34658	C10orf12	674.83/773.83/693.45	858.69/773.08/953.54	693.45	858.69	0.30793	3403.9	2452.1	3.3368	0.99958	0.00042374	0.00084747	0.042561	TRUE
BRUGEN64305	PTCRA	190.36/335.4/198.86	296.73/284.82/198.5	198.86	284.82	0.51613	9357.7	663.77	3.3365	0.99958	0.00042417	0.00084833	0.042577	TRUE
BRUGEN60158	SLCO6A1	779.58/791.71/779.11	955.22/975.55/937.4	779.58	955.22	0.29279	73.589	2771.8	3.3361	0.99958	0.00042477	0.00084954	0.042607	TRUE
BRUGEN37250	UBQLN3	438.14/456.31/465.02	594.47/589.01/550.85	456.31	589.01	0.36758	203.03	1582.4	3.336	0.99957	0.00042502	0.00085005	0.042607	TRUE
BRUGEN23062	DPM1	367.63/292.29/348.77	486.76/464.04/449.23	348.77	464.04	0.41097	1772.7	1194.5	3.3353	0.99957	0.000426	0.000852	0.04261	TRUE
BRUGEN21477	F8A1	523.75/440.54/391.6	557.89/594.83/570.8	440.54	570.8	0.37296	4659.9	1525.2	3.3353	0.99957	0.00042601	0.00085202	0.04261	TRUE
[truncated: 75,894 more rows]

## Sheet: read alignment
MAGeCK count alignment statistics
Sean Nesdoly
2019-10-11
[truncated: 48 more rows]

## Sheet: Sequencing QC
##FastQC	0.11.8									##FastQC	0.11.8									##FastQC	0.11.8									##FastQC	0.11.8									##FastQC	0.11.8
[truncated: 5,976 more rows]
[truncated: 7 more columns]
